# Supplementary material for: The western redcedar genome reveals low genetic diversity in a self-compatible conifer
Source: bioRxiv preprint, doi:10.1101/2022.08.26.505492, version 1 (2022-08-29)
Supplement: Dataset S6 [file 505492_file12.xlsx]

## Sheet: VEP_all_filtered_SNPs
SNP	Scaffold	Allele	Gene	Feature	Feature_type	Consequence	cDNA_position	CDS_position	Protein_position	Amino_acids	Codons	Existing_variation
28219388_1377	28219388	A	Thupl.28219388s0001	Thupl.28219388s0001.1.v3.1	Transcript	3_prime_UTR_variant	1142	NA	NA	NA	NA	NA
28894541_4633	28894541	G	Thupl.28894541s0001	Thupl.28894541s0001.1.v3.1	Transcript	3_prime_UTR_variant	973	NA	NA	NA	NA	NA
29167589_804	29167589	G	Thupl.29167589s0001	Thupl.29167589s0001.1.v3.1	Transcript	3_prime_UTR_variant	2713	NA	NA	NA	NA	NA
29167589_816	29167589	T	Thupl.29167589s0001	Thupl.29167589s0001.1.v3.1	Transcript	3_prime_UTR_variant	2701	NA	NA	NA	NA	NA
29334860_58168	29334860	C	Thupl.29334860s0001	Thupl.29334860s0001.1.v3.1	Transcript	3_prime_UTR_variant	1678	NA	NA	NA	NA	NA
29334860_58219	29334860	C	Thupl.29334860s0001	Thupl.29334860s0001.1.v3.1	Transcript	3_prime_UTR_variant	1627	NA	NA	NA	NA	NA
29334860_58237	29334860	T	Thupl.29334860s0001	Thupl.29334860s0001.1.v3.1	Transcript	3_prime_UTR_variant	1609	NA	NA	NA	NA	NA
29334860_58346	29334860	A	Thupl.29334860s0001	Thupl.29334860s0001.1.v3.1	Transcript	3_prime_UTR_variant	1500	NA	NA	NA	NA	NA
29334860_58407	29334860	T	Thupl.29334860s0001	Thupl.29334860s0001.1.v3.1	Transcript	3_prime_UTR_variant	1439	NA	NA	NA	NA	NA
29335619_112528	29335619	T	Thupl.29335619s0001	Thupl.29335619s0001.1.v3.1	Transcript	3_prime_UTR_variant	1346	NA	NA	NA	NA	NA
29335619_112579	29335619	C	Thupl.29335619s0001	Thupl.29335619s0001.1.v3.1	Transcript	3_prime_UTR_variant	1295	NA	NA	NA	NA	NA
29335619_112583	29335619	C	Thupl.29335619s0001	Thupl.29335619s0001.1.v3.1	Transcript	3_prime_UTR_variant	1291	NA	NA	NA	NA	NA
29336559_161888	29336559	G	Thupl.29336559s0003	Thupl.29336559s0003.1.v3.1	Transcript	3_prime_UTR_variant	928	NA	NA	NA	NA	NA
29336622_151895	29336622	G	Thupl.29336622s0002	Thupl.29336622s0002.1.v3.1	Transcript	3_prime_UTR_variant	1197	NA	NA	NA	NA	NA
29338161_67691	29338161	T	Thupl.29338161s0001	Thupl.29338161s0001.1.v3.1	Transcript	3_prime_UTR_variant	1432	NA	NA	NA	NA	NA
29343737_198399	29343737	C	Thupl.29343737s0001	Thupl.29343737s0001.1.v3.1	Transcript	3_prime_UTR_variant	2766	NA	NA	NA	NA	NA
29343737_198403	29343737	T	Thupl.29343737s0001	Thupl.29343737s0001.1.v3.1	Transcript	3_prime_UTR_variant	2770	NA	NA	NA	NA	NA
29343746_1392	29343746	C	Thupl.29343746s0001	Thupl.29343746s0001.1.v3.1	Transcript	3_prime_UTR_variant	640	NA	NA	NA	NA	NA
29344749_30994	29344749	T	Thupl.29344749s0001	Thupl.29344749s0001.1.v3.1	Transcript	3_prime_UTR_variant	1303	NA	NA	NA	NA	NA
29345763_422505	29345763	C	Thupl.29345763s0013	Thupl.29345763s0013.1.v3.1	Transcript	3_prime_UTR_variant	2074	NA	NA	NA	NA	NA
29345763_422629	29345763	T	Thupl.29345763s0013	Thupl.29345763s0013.1.v3.1	Transcript	3_prime_UTR_variant	2198	NA	NA	NA	NA	NA
29345763_422693	29345763	G	Thupl.29345763s0013	Thupl.29345763s0013.1.v3.1	Transcript	3_prime_UTR_variant	2262	NA	NA	NA	NA	NA
29346344_9812	29346344	G	Thupl.29346344s0001	Thupl.29346344s0001.1.v3.1	Transcript	3_prime_UTR_variant	689	NA	NA	NA	NA	NA
29346344_9856	29346344	A	Thupl.29346344s0001	Thupl.29346344s0001.1.v3.1	Transcript	3_prime_UTR_variant	733	NA	NA	NA	NA	NA
29346344_9895	29346344	C	Thupl.29346344s0001	Thupl.29346344s0001.1.v3.1	Transcript	3_prime_UTR_variant	772	NA	NA	NA	NA	NA
29346405_33822	29346405	G	Thupl.29346405s0001	Thupl.29346405s0001.1.v3.1	Transcript	3_prime_UTR_variant	726	NA	NA	NA	NA	NA
29346405_33887	29346405	G	Thupl.29346405s0001	Thupl.29346405s0001.1.v3.1	Transcript	3_prime_UTR_variant	661	NA	NA	NA	NA	NA
29347763_162117	29347763	G	Thupl.29347763s0002	Thupl.29347763s0002.2.v3.1	Transcript	3_prime_UTR_variant	1478	NA	NA	NA	NA	NA
29347763_162163	29347763	A	Thupl.29347763s0002	Thupl.29347763s0002.2.v3.1	Transcript	3_prime_UTR_variant	1432	NA	NA	NA	NA	NA
29347763_162225	29347763	A	Thupl.29347763s0002	Thupl.29347763s0002.2.v3.1	Transcript	3_prime_UTR_variant	1370	NA	NA	NA	NA	NA
29347763_345411	29347763	A	Thupl.29347763s0003	Thupl.29347763s0003.1.v3.1	Transcript	3_prime_UTR_variant	945	NA	NA	NA	NA	NA
29348210_120978	29348210	T	Thupl.29348210s0001	Thupl.29348210s0001.1.v3.1	Transcript	3_prime_UTR_variant	1721	NA	NA	NA	NA	NA
29348817_89557	29348817	G	Thupl.29348817s0001	Thupl.29348817s0001.1.v3.1	Transcript	3_prime_UTR_variant	850	NA	NA	NA	NA	NA
29349059_140174	29349059	G	Thupl.29349059s0002	Thupl.29349059s0002.1.v3.1	Transcript	3_prime_UTR_variant	1512	NA	NA	NA	NA	NA
29350508_1112457	29350508	T	Thupl.29350508s0010	Thupl.29350508s0010.1.v3.1	Transcript	3_prime_UTR_variant	2607	NA	NA	NA	NA	NA
29350508_1112483	29350508	A	Thupl.29350508s0010	Thupl.29350508s0010.1.v3.1	Transcript	3_prime_UTR_variant	2633	NA	NA	NA	NA	NA
29350804_444488	29350804	G	Thupl.29350804s0002	Thupl.29350804s0002.1.v3.1	Transcript	3_prime_UTR_variant	1842	NA	NA	NA	NA	NA
29350804_444902	29350804	T	Thupl.29350804s0002	Thupl.29350804s0002.1.v3.1	Transcript	3_prime_UTR_variant	2256	NA	NA	NA	NA	NA
29351431_395181	29351431	T	Thupl.29351431s0001	Thupl.29351431s0001.1.v3.1	Transcript	3_prime_UTR_variant	1661	NA	NA	NA	NA	NA
29351763_4322	29351763	G	Thupl.29351763s0001	Thupl.29351763s0001.2.v3.1	Transcript	3_prime_UTR_variant	1452	NA	NA	NA	NA	NA
29352345_75973	29352345	G	Thupl.29352345s0001	Thupl.29352345s0001.1.v3.1	Transcript	3_prime_UTR_variant	698	NA	NA	NA	NA	NA
29352514_140085	29352514	C	Thupl.29352514s0001	Thupl.29352514s0001.1.v3.1	Transcript	3_prime_UTR_variant	1558	NA	NA	NA	NA	NA
29353611_135621	29353611	G	Thupl.29353611s0001	Thupl.29353611s0001.1.v3.1	Transcript	3_prime_UTR_variant	1200	NA	NA	NA	NA	NA
29353611_135645	29353611	C	Thupl.29353611s0001	Thupl.29353611s0001.1.v3.1	Transcript	3_prime_UTR_variant	1224	NA	NA	NA	NA	NA
29354202_74281	29354202	G	Thupl.29354202s0001	Thupl.29354202s0001.1.v3.1	Transcript	3_prime_UTR_variant	1602	NA	NA	NA	NA	NA
29355190_173809	29355190	G	Thupl.29355190s0001	Thupl.29355190s0001.1.v3.1	Transcript	3_prime_UTR_variant	2343	NA	NA	NA	NA	NA
29355726_87345	29355726	A	Thupl.29355726s0003	Thupl.29355726s0003.1.v3.1	Transcript	3_prime_UTR_variant	1427	NA	NA	NA	NA	NA
29355726_87397	29355726	G	Thupl.29355726s0003	Thupl.29355726s0003.1.v3.1	Transcript	3_prime_UTR_variant	1375	NA	NA	NA	NA	NA
29355726_87437	29355726	C	Thupl.29355726s0003	Thupl.29355726s0003.1.v3.1	Transcript	3_prime_UTR_variant	1335	NA	NA	NA	NA	NA
29357168_525807	29357168	C	Thupl.29357168s0001	Thupl.29357168s0001.1.v3.1	Transcript	3_prime_UTR_variant	2562	NA	NA	NA	NA	NA
29358072_1252531	29358072	C	Thupl.29358072s0003	Thupl.29358072s0003.1.v3.1	Transcript	3_prime_UTR_variant	2384	NA	NA	NA	NA	NA
29358072_1252559	29358072	T	Thupl.29358072s0003	Thupl.29358072s0003.1.v3.1	Transcript	3_prime_UTR_variant	2412	NA	NA	NA	NA	NA
29359568_190786	29359568	A	Thupl.29359568s0002	Thupl.29359568s0002.1.v3.1	Transcript	3_prime_UTR_variant	698	NA	NA	NA	NA	NA
29359568_190813	29359568	T	Thupl.29359568s0002	Thupl.29359568s0002.1.v3.1	Transcript	3_prime_UTR_variant	725	NA	NA	NA	NA	NA
29359568_190846	29359568	T	Thupl.29359568s0002	Thupl.29359568s0002.1.v3.1	Transcript	3_prime_UTR_variant	758	NA	NA	NA	NA	NA
29360311_83765	29360311	T	Thupl.29360311s0001	Thupl.29360311s0001.1.v3.1	Transcript	3_prime_UTR_variant	931	NA	NA	NA	NA	NA
29361372_486921	29361372	C	Thupl.29361372s0007	Thupl.29361372s0007.1.v3.1	Transcript	3_prime_UTR_variant	806	NA	NA	NA	NA	NA
29362973_620494	29362973	A	Thupl.29362973s0004	Thupl.29362973s0004.1.v3.1	Transcript	3_prime_UTR_variant	1126	NA	NA	NA	NA	NA
29362973_620573	29362973	C	Thupl.29362973s0004	Thupl.29362973s0004.1.v3.1	Transcript	3_prime_UTR_variant	1205	NA	NA	NA	NA	NA
29364006_49330	29364006	T	Thupl.29364006s0001	Thupl.29364006s0001.1.v3.1	Transcript	3_prime_UTR_variant	1679	NA	NA	NA	NA	NA
29366303_67720	29366303	A	Thupl.29366303s0001	Thupl.29366303s0001.1.v3.1	Transcript	3_prime_UTR_variant	2045	NA	NA	NA	NA	NA
29367860_10740	29367860	A	Thupl.29367860s0001	Thupl.29367860s0001.1.v3.1	Transcript	3_prime_UTR_variant	4969	NA	NA	NA	NA	NA
29367860_10820	29367860	G	Thupl.29367860s0001	Thupl.29367860s0001.1.v3.1	Transcript	3_prime_UTR_variant	5049	NA	NA	NA	NA	NA
29367860_10835	29367860	A	Thupl.29367860s0001	Thupl.29367860s0001.1.v3.1	Transcript	3_prime_UTR_variant	5064	NA	NA	NA	NA	NA
29369386_38820	29369386	C	Thupl.29369386s0002	Thupl.29369386s0002.1.v3.1	Transcript	3_prime_UTR_variant	4628	NA	NA	NA	NA	NA
293717531_190514	293717531	A	Thupl.293717531s0002	Thupl.293717531s0002.1.v3.1	Transcript	3_prime_UTR_variant	1456	NA	NA	NA	NA	NA
29372105_60148	29372105	C	Thupl.29372105s0001	Thupl.29372105s0001.1.v3.1	Transcript	3_prime_UTR_variant	675	NA	NA	NA	NA	NA
29372212_428897	29372212	A	Thupl.29372212s0003	Thupl.29372212s0003.1.v3.1	Transcript	3_prime_UTR_variant	1032	NA	NA	NA	NA	NA
29372212_429037	29372212	C	Thupl.29372212s0003	Thupl.29372212s0003.1.v3.1	Transcript	3_prime_UTR_variant	1172	NA	NA	NA	NA	NA
29372212_429171	29372212	T	Thupl.29372212s0003	Thupl.29372212s0003.1.v3.1	Transcript	3_prime_UTR_variant	1306	NA	NA	NA	NA	NA
29372212_429190	29372212	C	Thupl.29372212s0003	Thupl.29372212s0003.1.v3.1	Transcript	3_prime_UTR_variant	1325	NA	NA	NA	NA	NA
29373002_65461	29373002	T	Thupl.29373002s0001	Thupl.29373002s0001.1.v3.1	Transcript	3_prime_UTR_variant	1146	NA	NA	NA	NA	NA
29375488_733453	29375488	C	Thupl.29375488s0002	Thupl.29375488s0002.1.v3.1	Transcript	3_prime_UTR_variant	4576	NA	NA	NA	NA	NA
29375488_733647	29375488	T	Thupl.29375488s0002	Thupl.29375488s0002.1.v3.1	Transcript	3_prime_UTR_variant	4770	NA	NA	NA	NA	NA
29375488_733724	29375488	T	Thupl.29375488s0002	Thupl.29375488s0002.1.v3.1	Transcript	3_prime_UTR_variant	4847	NA	NA	NA	NA	NA
29375488_733765	29375488	C	Thupl.29375488s0002	Thupl.29375488s0002.1.v3.1	Transcript	3_prime_UTR_variant	4888	NA	NA	NA	NA	NA
29375488_733784	29375488	A	Thupl.29375488s0002	Thupl.29375488s0002.1.v3.1	Transcript	3_prime_UTR_variant	4907	NA	NA	NA	NA	NA
29375488_733806	29375488	A	Thupl.29375488s0002	Thupl.29375488s0002.1.v3.1	Transcript	3_prime_UTR_variant	4929	NA	NA	NA	NA	NA
29375488_733820	29375488	G	Thupl.29375488s0002	Thupl.29375488s0002.1.v3.1	Transcript	3_prime_UTR_variant	4943	NA	NA	NA	NA	NA
29376428_507705	29376428	A	Thupl.29376428s0001	Thupl.29376428s0001.1.v3.1	Transcript	3_prime_UTR_variant	1890	NA	NA	NA	NA	NA
29376428_507796	29376428	A	Thupl.29376428s0001	Thupl.29376428s0001.1.v3.1	Transcript	3_prime_UTR_variant	1981	NA	NA	NA	NA	NA
29376458_574176	29376458	G	Thupl.29376458s0003	Thupl.29376458s0003.1.v3.1	Transcript	3_prime_UTR_variant	1034	NA	NA	NA	NA	NA
29376488_408174	29376488	G	Thupl.29376488s0002	Thupl.29376488s0002.1.v3.1	Transcript	3_prime_UTR_variant	3100	NA	NA	NA	NA	NA
29376837_473318	29376837	T	Thupl.29376837s0007	Thupl.29376837s0007.1.v3.1	Transcript	3_prime_UTR_variant	1014	NA	NA	NA	NA	NA
29376837_473392	29376837	C	Thupl.29376837s0007	Thupl.29376837s0007.1.v3.1	Transcript	3_prime_UTR_variant	940	NA	NA	NA	NA	NA
29376837_473513	29376837	A	Thupl.29376837s0007	Thupl.29376837s0007.1.v3.1	Transcript	3_prime_UTR_variant	819	NA	NA	NA	NA	NA
29376992_925698	29376992	A	Thupl.29376992s0005	Thupl.29376992s0005.2.v3.1	Transcript	3_prime_UTR_variant	841	NA	NA	NA	NA	NA
29376994_650774	29376994	T	Thupl.29376994s0001	Thupl.29376994s0001.1.v3.1	Transcript	3_prime_UTR_variant	1700	NA	NA	NA	NA	NA
29377000_39543	29377000	C	Thupl.29377000s0001	Thupl.29377000s0001.1.v3.1	Transcript	3_prime_UTR_variant	2067	NA	NA	NA	NA	NA
29377001_2749587	29377001	C	Thupl.29377001s0013	Thupl.29377001s0013.1.v3.1	Transcript	3_prime_UTR_variant	1002	NA	NA	NA	NA	NA
29377001_3190543	29377001	T	Thupl.29377001s0016	Thupl.29377001s0016.1.v3.1	Transcript	3_prime_UTR_variant	3414	NA	NA	NA	NA	NA
29377001_3287466	29377001	G	Thupl.29377001s0017	Thupl.29377001s0017.1.v3.1	Transcript	3_prime_UTR_variant	3606	NA	NA	NA	NA	NA
29377001_3287668	29377001	T	Thupl.29377001s0017	Thupl.29377001s0017.1.v3.1	Transcript	3_prime_UTR_variant	3808	NA	NA	NA	NA	NA
29377006_639648	29377006	T	Thupl.29377006s0002	Thupl.29377006s0002.1.v3.1	Transcript	3_prime_UTR_variant	1747	NA	NA	NA	NA	NA
29377012_293611	29377012	G	Thupl.29377012s0003	Thupl.29377012s0003.1.v3.1	Transcript	3_prime_UTR_variant	1220	NA	NA	NA	NA	NA
29377013_3398424	29377013	A	Thupl.29377013s0014	Thupl.29377013s0014.1.v3.1	Transcript	3_prime_UTR_variant	6892	NA	NA	NA	NA	NA
29377018_4359793	29377018	T	Thupl.29377018s0017	Thupl.29377018s0017.1.v3.1	Transcript	3_prime_UTR_variant	1854	NA	NA	NA	NA	NA
29377018_4359840	29377018	A	Thupl.29377018s0017	Thupl.29377018s0017.1.v3.1	Transcript	3_prime_UTR_variant	1807	NA	NA	NA	NA	NA
29377020_1006465	29377020	C	Thupl.29377020s0006	Thupl.29377020s0006.1.v3.1	Transcript	3_prime_UTR_variant	1764	NA	NA	NA	NA	NA
29377022_1761852	29377022	G	Thupl.29377022s0004	Thupl.29377022s0004.1.v3.1	Transcript	3_prime_UTR_variant	1538	NA	NA	NA	NA	NA
29377027_800105	29377027	A	Thupl.29377027s0003	Thupl.29377027s0003.1.v3.1	Transcript	3_prime_UTR_variant	1851	NA	NA	NA	NA	NA
29377027_800146	29377027	G	Thupl.29377027s0003	Thupl.29377027s0003.1.v3.1	Transcript	3_prime_UTR_variant	1892	NA	NA	NA	NA	NA
29377027_1611941	29377027	G	Thupl.29377027s0008	Thupl.29377027s0008.1.v3.1	Transcript	3_prime_UTR_variant	2793	NA	NA	NA	NA	NA
29377027_2918349	29377027	C	Thupl.29377027s0013	Thupl.29377027s0013.1.v3.1	Transcript	3_prime_UTR_variant	1286	NA	NA	NA	NA	NA
29377034_469949	29377034	G	Thupl.29377034s0001	Thupl.29377034s0001.1.v3.1	Transcript	3_prime_UTR_variant	718	NA	NA	NA	NA	NA
29377034_470035	29377034	C	Thupl.29377034s0001	Thupl.29377034s0001.1.v3.1	Transcript	3_prime_UTR_variant	804	NA	NA	NA	NA	NA
29377035_730898	29377035	G	Thupl.29377035s0003	Thupl.29377035s0003.1.v3.1	Transcript	3_prime_UTR_variant	2085	NA	NA	NA	NA	NA
29377036_120322	29377036	T	Thupl.29377036s0003	Thupl.29377036s0003.1.v3.1	Transcript	3_prime_UTR_variant	882	NA	NA	NA	NA	NA
29377036_120428	29377036	A	Thupl.29377036s0003	Thupl.29377036s0003.1.v3.1	Transcript	3_prime_UTR_variant	776	NA	NA	NA	NA	NA
29377047_907197	29377047	T	Thupl.29377047s0010	Thupl.29377047s0010.1.v3.1	Transcript	3_prime_UTR_variant	1650	NA	NA	NA	NA	NA
29377047_907259	29377047	C	Thupl.29377047s0010	Thupl.29377047s0010.1.v3.1	Transcript	3_prime_UTR_variant	1712	NA	NA	NA	NA	NA
29377047_907266	29377047	A	Thupl.29377047s0010	Thupl.29377047s0010.1.v3.1	Transcript	3_prime_UTR_variant	1719	NA	NA	NA	NA	NA
29377047_1625209	29377047	A	Thupl.29377047s0014	Thupl.29377047s0014.1.v3.1	Transcript	3_prime_UTR_variant	1725	NA	NA	NA	NA	NA
29377068_2265457	29377068	A	Thupl.29377068s0004	Thupl.29377068s0004.1.v3.1	Transcript	3_prime_UTR_variant	1324	NA	NA	NA	NA	NA
29377068_2265486	29377068	T	Thupl.29377068s0004	Thupl.29377068s0004.1.v3.1	Transcript	3_prime_UTR_variant	1353	NA	NA	NA	NA	NA
29377073_82934	29377073	C	Thupl.29377073s0001	Thupl.29377073s0001.1.v3.1	Transcript	3_prime_UTR_variant	5501	NA	NA	NA	NA	NA
29377078_61117	29377078	T	Thupl.29377078s0001	Thupl.29377078s0001.1.v3.1	Transcript	3_prime_UTR_variant	2896	NA	NA	NA	NA	NA
29377078_61245	29377078	G	Thupl.29377078s0001	Thupl.29377078s0001.1.v3.1	Transcript	3_prime_UTR_variant	3024	NA	NA	NA	NA	NA
29377078_61291	29377078	T	Thupl.29377078s0001	Thupl.29377078s0001.1.v3.1	Transcript	3_prime_UTR_variant	3070	NA	NA	NA	NA	NA
29377078_61332	29377078	G	Thupl.29377078s0001	Thupl.29377078s0001.1.v3.1	Transcript	3_prime_UTR_variant	3111	NA	NA	NA	NA	NA
29377078_61342	29377078	T	Thupl.29377078s0001	Thupl.29377078s0001.1.v3.1	Transcript	3_prime_UTR_variant	3121	NA	NA	NA	NA	NA
29377079_163182	29377079	G	Thupl.29377079s0001	Thupl.29377079s0001.1.v3.1	Transcript	3_prime_UTR_variant	2901	NA	NA	NA	NA	NA
29377079_163195	29377079	A	Thupl.29377079s0001	Thupl.29377079s0001.1.v3.1	Transcript	3_prime_UTR_variant	2888	NA	NA	NA	NA	NA
29377079_1076190	29377079	A	Thupl.29377079s0003	Thupl.29377079s0003.1.v3.1	Transcript	3_prime_UTR_variant	1362	NA	NA	NA	NA	NA
29377079_1076229	29377079	A	Thupl.29377079s0003	Thupl.29377079s0003.1.v3.1	Transcript	3_prime_UTR_variant	1401	NA	NA	NA	NA	NA
29377079_1076259	29377079	T	Thupl.29377079s0003	Thupl.29377079s0003.1.v3.1	Transcript	3_prime_UTR_variant	1431	NA	NA	NA	NA	NA
29377079_1748248	29377079	G	Thupl.29377079s0006	Thupl.29377079s0006.1.v3.1	Transcript	3_prime_UTR_variant	1276	NA	NA	NA	NA	NA
29377079_1748274	29377079	G	Thupl.29377079s0006	Thupl.29377079s0006.1.v3.1	Transcript	3_prime_UTR_variant	1302	NA	NA	NA	NA	NA
29377081_1524886	29377081	A	Thupl.29377081s0007	Thupl.29377081s0007.1.v3.1	Transcript	3_prime_UTR_variant	2255	NA	NA	NA	NA	NA
29377081_1524968	29377081	C	Thupl.29377081s0007	Thupl.29377081s0007.1.v3.1	Transcript	3_prime_UTR_variant	2337	NA	NA	NA	NA	NA
29377081_2192021	29377081	T	Thupl.29377081s0010	Thupl.29377081s0010.1.v3.1	Transcript	3_prime_UTR_variant	2850	NA	NA	NA	NA	NA
29377084_1122478	29377084	G	Thupl.29377084s0009	Thupl.29377084s0009.1.v3.1	Transcript	3_prime_UTR_variant	3799	NA	NA	NA	NA	NA
29377084_1122512	29377084	C	Thupl.29377084s0009	Thupl.29377084s0009.1.v3.1	Transcript	3_prime_UTR_variant	3765	NA	NA	NA	NA	NA
29377091_1201222	29377091	G	Thupl.29377091s0009	Thupl.29377091s0009.1.v3.1	Transcript	3_prime_UTR_variant	1234	NA	NA	NA	NA	NA
29377091_1201239	29377091	C	Thupl.29377091s0009	Thupl.29377091s0009.1.v3.1	Transcript	3_prime_UTR_variant	1251	NA	NA	NA	NA	NA
29377097_1886304	29377097	G	Thupl.29377097s0014	Thupl.29377097s0014.1.v3.1	Transcript	3_prime_UTR_variant	1125	NA	NA	NA	NA	NA
29377105_2636799	29377105	G	Thupl.29377105s0010	Thupl.29377105s0010.1.v3.1	Transcript	3_prime_UTR_variant	1180	NA	NA	NA	NA	NA
29377105_2636819	29377105	G	Thupl.29377105s0010	Thupl.29377105s0010.1.v3.1	Transcript	3_prime_UTR_variant	1160	NA	NA	NA	NA	NA
29377106_2971118	29377106	C	Thupl.29377106s0004	Thupl.29377106s0004.1.v3.1	Transcript	3_prime_UTR_variant	5225	NA	NA	NA	NA	NA
29377109_1244499	29377109	A	Thupl.29377109s0005	Thupl.29377109s0005.1.v3.1	Transcript	3_prime_UTR_variant	1229	NA	NA	NA	NA	NA
29377109_2332906	29377109	G	Thupl.29377109s0016	Thupl.29377109s0016.1.v3.1	Transcript	3_prime_UTR_variant	1572	NA	NA	NA	NA	NA
29377112_1279359	29377112	C	Thupl.29377112s0011	Thupl.29377112s0011.1.v3.1	Transcript	3_prime_UTR_variant	696	NA	NA	NA	NA	NA
29377113_4454	29377113	T	Thupl.29377113s0001	Thupl.29377113s0001.1.v3.1	Transcript	3_prime_UTR_variant	2844	NA	NA	NA	NA	NA
29377127_4644461	29377127	C	Thupl.29377127s0025	Thupl.29377127s0025.1.v3.1	Transcript	3_prime_UTR_variant	814	NA	NA	NA	NA	NA
29377127_4644484	29377127	C	Thupl.29377127s0025	Thupl.29377127s0025.1.v3.1	Transcript	3_prime_UTR_variant	791	NA	NA	NA	NA	NA
29377127_5074362	29377127	G	Thupl.29377127s0026	Thupl.29377127s0026.1.v3.1	Transcript	3_prime_UTR_variant	782	NA	NA	NA	NA	NA
29377127_5074421	29377127	T	Thupl.29377127s0026	Thupl.29377127s0026.1.v3.1	Transcript	3_prime_UTR_variant	841	NA	NA	NA	NA	NA
29377129_1739506	29377129	C	Thupl.29377129s0010	Thupl.29377129s0010.1.v3.1	Transcript	3_prime_UTR_variant	866	NA	NA	NA	NA	NA
29377141_310839	29377141	C	Thupl.29377141s0003	Thupl.29377141s0003.1.v3.1	Transcript	3_prime_UTR_variant	2265	NA	NA	NA	NA	NA
29377141_310841	29377141	A	Thupl.29377141s0003	Thupl.29377141s0003.1.v3.1	Transcript	3_prime_UTR_variant	2263	NA	NA	NA	NA	NA
29377141_310898	29377141	T	Thupl.29377141s0003	Thupl.29377141s0003.1.v3.1	Transcript	3_prime_UTR_variant	2206	NA	NA	NA	NA	NA
29377141_310955	29377141	A	Thupl.29377141s0003	Thupl.29377141s0003.1.v3.1	Transcript	3_prime_UTR_variant	2149	NA	NA	NA	NA	NA
29377141_310974	29377141	A	Thupl.29377141s0003	Thupl.29377141s0003.1.v3.1	Transcript	3_prime_UTR_variant	2130	NA	NA	NA	NA	NA
29377146_704169	29377146	C	Thupl.29377146s0002	Thupl.29377146s0002.1.v3.1	Transcript	3_prime_UTR_variant	2169	NA	NA	NA	NA	NA
29377146_1675401	29377146	A	Thupl.29377146s0006	Thupl.29377146s0006.1.v3.1	Transcript	3_prime_UTR_variant	2510	NA	NA	NA	NA	NA
29377151_2154878	29377151	G	Thupl.29377151s0004	Thupl.29377151s0004.1.v3.1	Transcript	3_prime_UTR_variant	1883	NA	NA	NA	NA	NA
29377163_3523527	29377163	A	Thupl.29377163s0021	Thupl.29377163s0021.1.v3.1	Transcript	3_prime_UTR_variant	2995	NA	NA	NA	NA	NA
29377169_2477153	29377169	C	Thupl.29377169s0020	Thupl.29377169s0020.1.v3.1	Transcript	3_prime_UTR_variant	2635	NA	NA	NA	NA	NA
29377169_2477211	29377169	A	Thupl.29377169s0020	Thupl.29377169s0020.1.v3.1	Transcript	3_prime_UTR_variant	2577	NA	NA	NA	NA	NA
29377169_2477222	29377169	A	Thupl.29377169s0020	Thupl.29377169s0020.1.v3.1	Transcript	3_prime_UTR_variant	2566	NA	NA	NA	NA	NA
29377170_6717520	29377170	G	Thupl.29377170s0033	Thupl.29377170s0033.1.v3.1	Transcript	3_prime_UTR_variant	2310	NA	NA	NA	NA	NA
29377170_6717602	29377170	T	Thupl.29377170s0033	Thupl.29377170s0033.1.v3.1	Transcript	3_prime_UTR_variant	2392	NA	NA	NA	NA	NA
29377170_6971250	29377170	C	Thupl.29377170s0036	Thupl.29377170s0036.1.v3.1	Transcript	3_prime_UTR_variant	3215	NA	NA	NA	NA	NA
29377170_6971253	29377170	A	Thupl.29377170s0036	Thupl.29377170s0036.1.v3.1	Transcript	3_prime_UTR_variant	3212	NA	NA	NA	NA	NA
29377170_11873346	29377170	G	Thupl.29377170s0066	Thupl.29377170s0066.1.v3.1	Transcript	3_prime_UTR_variant	605	NA	NA	NA	NA	NA
29377170_11873483	29377170	C	Thupl.29377170s0066	Thupl.29377170s0066.1.v3.1	Transcript	3_prime_UTR_variant	742	NA	NA	NA	NA	NA
29377171_4905799	29377171	A	Thupl.29377171s0013	Thupl.29377171s0013.1.v3.1	Transcript	3_prime_UTR_variant	2785	NA	NA	NA	NA	NA
29377172_572571	29377172	T	Thupl.29377172s0002	Thupl.29377172s0002.1.v3.1	Transcript	3_prime_UTR_variant	1228	NA	NA	NA	NA	NA
29377172_572625	29377172	T	Thupl.29377172s0002	Thupl.29377172s0002.1.v3.1	Transcript	3_prime_UTR_variant	1282	NA	NA	NA	NA	NA
29377175_1507474	29377175	C	Thupl.29377175s0007	Thupl.29377175s0007.1.v3.1	Transcript	3_prime_UTR_variant	1590	NA	NA	NA	NA	NA
29377175_1507539	29377175	T	Thupl.29377175s0007	Thupl.29377175s0007.1.v3.1	Transcript	3_prime_UTR_variant	1525	NA	NA	NA	NA	NA
29377177_311443	29377177	C	Thupl.29377177s0003	Thupl.29377177s0003.1.v3.1	Transcript	3_prime_UTR_variant	2854	NA	NA	NA	NA	NA
29377189_1010169	29377189	T	Thupl.29377189s0004	Thupl.29377189s0004.1.v3.1	Transcript	3_prime_UTR_variant	1447	NA	NA	NA	NA	NA
29377198_2199394	29377198	T	Thupl.29377198s0015	Thupl.29377198s0015.1.v3.1	Transcript	3_prime_UTR_variant	1034	NA	NA	NA	NA	NA
29377205_557469	29377205	A	Thupl.29377205s0010	Thupl.29377205s0010.1.v3.1	Transcript	3_prime_UTR_variant	1487	NA	NA	NA	NA	NA
29377207_14685	29377207	T	Thupl.29377207s0002	Thupl.29377207s0002.2.v3.1	Transcript	3_prime_UTR_variant	1886	NA	NA	NA	NA	NA
29377214_709623	29377214	T	Thupl.29377214s0003	Thupl.29377214s0003.1.v3.1	Transcript	3_prime_UTR_variant	1531	NA	NA	NA	NA	NA
29377214_4832353	29377214	A	Thupl.29377214s0020	Thupl.29377214s0020.1.v3.1	Transcript	3_prime_UTR_variant	1222	NA	NA	NA	NA	NA
29377221_154963	29377221	G	Thupl.29377221s0002	Thupl.29377221s0002.1.v3.1	Transcript	3_prime_UTR_variant	1959	NA	NA	NA	NA	NA
29377226_584918	29377226	C	Thupl.29377226s0006	Thupl.29377226s0006.1.v3.1	Transcript	3_prime_UTR_variant	2595	NA	NA	NA	NA	NA
29377226_584938	29377226	G	Thupl.29377226s0006	Thupl.29377226s0006.1.v3.1	Transcript	3_prime_UTR_variant	2575	NA	NA	NA	NA	NA
29377239_159621	29377239	T	Thupl.29377239s0005	Thupl.29377239s0005.1.v3.1	Transcript	3_prime_UTR_variant	812	NA	NA	NA	NA	NA
29377239_159678	29377239	G	Thupl.29377239s0005	Thupl.29377239s0005.1.v3.1	Transcript	3_prime_UTR_variant	755	NA	NA	NA	NA	NA
29377247_84972	29377247	T	Thupl.29377247s0001	Thupl.29377247s0001.1.v3.1	Transcript	3_prime_UTR_variant	2079	NA	NA	NA	NA	NA
29377248_379583	29377248	G	Thupl.29377248s0001	Thupl.29377248s0001.1.v3.1	Transcript	3_prime_UTR_variant	1121	NA	NA	NA	NA	NA
29377249_5341848	29377249	T	Thupl.29377249s0032	Thupl.29377249s0032.2.v3.1	Transcript	3_prime_UTR_variant	4624	NA	NA	NA	NA	NA
29377260_947121	29377260	A	Thupl.29377260s0006	Thupl.29377260s0006.1.v3.1	Transcript	3_prime_UTR_variant	1660	NA	NA	NA	NA	NA
29377264_63564	29377264	G	Thupl.29377264s0001	Thupl.29377264s0001.1.v3.1	Transcript	3_prime_UTR_variant	498	NA	NA	NA	NA	NA
29377264_63617	29377264	A	Thupl.29377264s0001	Thupl.29377264s0001.2.v3.1	Transcript	3_prime_UTR_variant	479	NA	NA	NA	NA	NA
29377264_63631	29377264	G	Thupl.29377264s0001	Thupl.29377264s0001.2.v3.1	Transcript	3_prime_UTR_variant	493	NA	NA	NA	NA	NA
29377264_63676	29377264	G	Thupl.29377264s0001	Thupl.29377264s0001.2.v3.1	Transcript	3_prime_UTR_variant	538	NA	NA	NA	NA	NA
29377271_731381	29377271	T	Thupl.29377271s0003	Thupl.29377271s0003.1.v3.1	Transcript	3_prime_UTR_variant	655	NA	NA	NA	NA	NA
29377271_1292403	29377271	T	Thupl.29377271s0005	Thupl.29377271s0005.2.v3.1	Transcript	3_prime_UTR_variant	1276	NA	NA	NA	NA	NA
29377271_1292421	29377271	T	Thupl.29377271s0005	Thupl.29377271s0005.2.v3.1	Transcript	3_prime_UTR_variant	1294	NA	NA	NA	NA	NA
29377274_1586232	29377274	T	Thupl.29377274s0002	Thupl.29377274s0002.1.v3.1	Transcript	3_prime_UTR_variant	4882	NA	NA	NA	NA	NA
29377274_1586426	29377274	T	Thupl.29377274s0002	Thupl.29377274s0002.1.v3.1	Transcript	3_prime_UTR_variant	5076	NA	NA	NA	NA	NA
29377274_1586446	29377274	T	Thupl.29377274s0002	Thupl.29377274s0002.1.v3.1	Transcript	3_prime_UTR_variant	5096	NA	NA	NA	NA	NA
29377274_1586454	29377274	G	Thupl.29377274s0002	Thupl.29377274s0002.1.v3.1	Transcript	3_prime_UTR_variant	5104	NA	NA	NA	NA	NA
29377274_2274650	29377274	C	Thupl.29377274s0007	Thupl.29377274s0007.1.v3.1	Transcript	3_prime_UTR_variant	3530	NA	NA	NA	NA	NA
29377274_2615998	29377274	T	Thupl.29377274s0009	Thupl.29377274s0009.1.v3.1	Transcript	3_prime_UTR_variant	2196	NA	NA	NA	NA	NA
29377274_2616047	29377274	T	Thupl.29377274s0009	Thupl.29377274s0009.1.v3.1	Transcript	3_prime_UTR_variant	2147	NA	NA	NA	NA	NA
29377274_2616049	29377274	A	Thupl.29377274s0009	Thupl.29377274s0009.1.v3.1	Transcript	3_prime_UTR_variant	2145	NA	NA	NA	NA	NA
29377276_261259	29377276	A	Thupl.29377276s0001	Thupl.29377276s0001.1.v3.1	Transcript	3_prime_UTR_variant	1085	NA	NA	NA	NA	NA
29377277_5364027	29377277	G	Thupl.29377277s0024	Thupl.29377277s0024.1.v3.1	Transcript	3_prime_UTR_variant	1544	NA	NA	NA	NA	NA
29377278_244398	29377278	T	Thupl.29377278s0002	Thupl.29377278s0002.1.v3.1	Transcript	3_prime_UTR_variant	2148	NA	NA	NA	NA	NA
29377278_463830	29377278	A	Thupl.29377278s0005	Thupl.29377278s0005.1.v3.1	Transcript	3_prime_UTR_variant	1820	NA	NA	NA	NA	NA
29377286_197832	29377286	A	Thupl.29377286s0001	Thupl.29377286s0001.2.v3.1	Transcript	3_prime_UTR_variant	1144	NA	NA	NA	NA	NA
29377294_9049	29377294	T	Thupl.29377294s0001	Thupl.29377294s0001.1.v3.1	Transcript	3_prime_UTR_variant	3744	NA	NA	NA	NA	NA
29377294_9080	29377294	G	Thupl.29377294s0001	Thupl.29377294s0001.1.v3.1	Transcript	3_prime_UTR_variant	3713	NA	NA	NA	NA	NA
29377309_127887	29377309	T	Thupl.29377309s0002	Thupl.29377309s0002.1.v3.1	Transcript	3_prime_UTR_variant	3451	NA	NA	NA	NA	NA
29377317_361108	29377317	C	Thupl.29377317s0001	Thupl.29377317s0001.1.v3.1	Transcript	3_prime_UTR_variant	3161	NA	NA	NA	NA	NA
29377317_361140	29377317	A	Thupl.29377317s0001	Thupl.29377317s0001.1.v3.1	Transcript	3_prime_UTR_variant	3129	NA	NA	NA	NA	NA
29377317_361312	29377317	T	Thupl.29377317s0001	Thupl.29377317s0001.1.v3.1	Transcript	3_prime_UTR_variant	2957	NA	NA	NA	NA	NA
29377322_934784	29377322	T	Thupl.29377322s0003	Thupl.29377322s0003.1.v3.1	Transcript	3_prime_UTR_variant	3032	NA	NA	NA	NA	NA
29377326_1034683	29377326	T	Thupl.29377326s0003	Thupl.29377326s0003.1.v3.1	Transcript	3_prime_UTR_variant	590	NA	NA	NA	NA	NA
29377326_1034784	29377326	A	Thupl.29377326s0003	Thupl.29377326s0003.1.v3.1	Transcript	3_prime_UTR_variant	489	NA	NA	NA	NA	NA
29377328_548284	29377328	G	Thupl.29377328s0004	Thupl.29377328s0004.1.v3.1	Transcript	3_prime_UTR_variant	1466	NA	NA	NA	NA	NA
29377328_868521	29377328	T	Thupl.29377328s0005	Thupl.29377328s0005.1.v3.1	Transcript	3_prime_UTR_variant	2792	NA	NA	NA	NA	NA
29377330_1428447	29377330	T	Thupl.29377330s0005	Thupl.29377330s0005.1.v3.1	Transcript	3_prime_UTR_variant	2748	NA	NA	NA	NA	NA
29377330_1428512	29377330	G	Thupl.29377330s0005	Thupl.29377330s0005.1.v3.1	Transcript	3_prime_UTR_variant	2813	NA	NA	NA	NA	NA
29377330_1428514	29377330	G	Thupl.29377330s0005	Thupl.29377330s0005.1.v3.1	Transcript	3_prime_UTR_variant	2815	NA	NA	NA	NA	NA
29377336_1084923	29377336	C	Thupl.29377336s0005	Thupl.29377336s0005.1.v3.1	Transcript	3_prime_UTR_variant	2920	NA	NA	NA	NA	NA
29377336_1084952	29377336	T	Thupl.29377336s0005	Thupl.29377336s0005.1.v3.1	Transcript	3_prime_UTR_variant	2949	NA	NA	NA	NA	NA
29377336_1376762	29377336	G	Thupl.29377336s0006	Thupl.29377336s0006.1.v3.1	Transcript	3_prime_UTR_variant	1890	NA	NA	NA	NA	NA
29377337_696694	29377337	C	Thupl.29377337s0007	Thupl.29377337s0007.1.v3.1	Transcript	3_prime_UTR_variant	1312	NA	NA	NA	NA	NA
29377337_1196013	29377337	G	Thupl.29377337s0009	Thupl.29377337s0009.1.v3.1	Transcript	3_prime_UTR_variant	1184	NA	NA	NA	NA	NA
29377341_919765	29377341	A	Thupl.29377341s0003	Thupl.29377341s0003.1.v3.1	Transcript	3_prime_UTR_variant	1022	NA	NA	NA	NA	NA
29377349_4071651	29377349	C	Thupl.29377349s0013	Thupl.29377349s0013.1.v3.1	Transcript	3_prime_UTR_variant	3008	NA	NA	NA	NA	NA
29377349_4071675	29377349	C	Thupl.29377349s0013	Thupl.29377349s0013.1.v3.1	Transcript	3_prime_UTR_variant	3032	NA	NA	NA	NA	NA
29377349_4071714	29377349	C	Thupl.29377349s0013	Thupl.29377349s0013.1.v3.1	Transcript	3_prime_UTR_variant	3071	NA	NA	NA	NA	NA
29377349_4071797	29377349	G	Thupl.29377349s0013	Thupl.29377349s0013.1.v3.1	Transcript	3_prime_UTR_variant	3154	NA	NA	NA	NA	NA
29377349_4071838	29377349	A	Thupl.29377349s0013	Thupl.29377349s0013.1.v3.1	Transcript	3_prime_UTR_variant	3195	NA	NA	NA	NA	NA
29377349_4071893	29377349	G	Thupl.29377349s0013	Thupl.29377349s0013.1.v3.1	Transcript	3_prime_UTR_variant	3250	NA	NA	NA	NA	NA
29377349_4071957	29377349	A	Thupl.29377349s0013	Thupl.29377349s0013.1.v3.1	Transcript	3_prime_UTR_variant	3314	NA	NA	NA	NA	NA
29377354_341998	29377354	C	Thupl.29377354s0002	Thupl.29377354s0002.1.v3.1	Transcript	3_prime_UTR_variant	1479	NA	NA	NA	NA	NA
29377354_342273	29377354	T	Thupl.29377354s0002	Thupl.29377354s0002.1.v3.1	Transcript	3_prime_UTR_variant	1204	NA	NA	NA	NA	NA
29377354_1404161	29377354	C	Thupl.29377354s0005	Thupl.29377354s0005.1.v3.1	Transcript	3_prime_UTR_variant	1876	NA	NA	NA	NA	NA
29377356_2142577	29377356	C	Thupl.29377356s0010	Thupl.29377356s0010.1.v3.1	Transcript	3_prime_UTR_variant	2144	NA	NA	NA	NA	NA
29377356_2142631	29377356	T	Thupl.29377356s0010	Thupl.29377356s0010.1.v3.1	Transcript	3_prime_UTR_variant	2198	NA	NA	NA	NA	NA
29377356_2392275	29377356	T	Thupl.29377356s0014	Thupl.29377356s0014.1.v3.1	Transcript	3_prime_UTR_variant	1815	NA	NA	NA	NA	NA
29377368_3117339	29377368	A	Thupl.29377368s0020	Thupl.29377368s0020.1.v3.1	Transcript	3_prime_UTR_variant	1532	NA	NA	NA	NA	NA
29377375_1027027	29377375	C	Thupl.29377375s0004	Thupl.29377375s0004.1.v3.1	Transcript	3_prime_UTR_variant	3692	NA	NA	NA	NA	NA
29377376_1130868	29377376	A	Thupl.29377376s0004	Thupl.29377376s0004.1.v3.1	Transcript	3_prime_UTR_variant	1656	NA	NA	NA	NA	NA
29377376_2846927	29377376	G	Thupl.29377376s0013	Thupl.29377376s0013.1.v3.1	Transcript	3_prime_UTR_variant	1394	NA	NA	NA	NA	NA
29377376_2846929	29377376	G	Thupl.29377376s0013	Thupl.29377376s0013.1.v3.1	Transcript	3_prime_UTR_variant	1396	NA	NA	NA	NA	NA
29377380_602323	29377380	T	Thupl.29377380s0003	Thupl.29377380s0003.1.v3.1	Transcript	3_prime_UTR_variant	2514	NA	NA	NA	NA	NA
29377381_2101521	29377381	G	Thupl.29377381s0010	Thupl.29377381s0010.1.v3.1	Transcript	3_prime_UTR_variant	1466	NA	NA	NA	NA	NA
29377381_2101564	29377381	C	Thupl.29377381s0010	Thupl.29377381s0010.1.v3.1	Transcript	3_prime_UTR_variant	1509	NA	NA	NA	NA	NA
29377393_42807	29377393	T	Thupl.29377393s0001	Thupl.29377393s0001.1.v3.1	Transcript	3_prime_UTR_variant	3106	NA	NA	NA	NA	NA
29377393_42836	29377393	A	Thupl.29377393s0001	Thupl.29377393s0001.1.v3.1	Transcript	3_prime_UTR_variant	3077	NA	NA	NA	NA	NA
29377401_83443	29377401	C	Thupl.29377401s0001	Thupl.29377401s0001.1.v3.1	Transcript	3_prime_UTR_variant	1155	NA	NA	NA	NA	NA
29377401_83609	29377401	A	Thupl.29377401s0001	Thupl.29377401s0001.1.v3.1	Transcript	3_prime_UTR_variant	1321	NA	NA	NA	NA	NA
29377401_83665	29377401	G	Thupl.29377401s0001	Thupl.29377401s0001.1.v3.1	Transcript	3_prime_UTR_variant	1377	NA	NA	NA	NA	NA
29377401_83721	29377401	C	Thupl.29377401s0001	Thupl.29377401s0001.1.v3.1	Transcript	3_prime_UTR_variant	1433	NA	NA	NA	NA	NA
29377401_304363	29377401	A	Thupl.29377401s0002	Thupl.29377401s0002.1.v3.1	Transcript	3_prime_UTR_variant	7560	NA	NA	NA	NA	NA
29377401_1847645	29377401	G	Thupl.29377401s0009	Thupl.29377401s0009.1.v3.1	Transcript	3_prime_UTR_variant	1335	NA	NA	NA	NA	NA
29377401_1847728	29377401	G	Thupl.29377401s0009	Thupl.29377401s0009.1.v3.1	Transcript	3_prime_UTR_variant	1418	NA	NA	NA	NA	NA
29377401_2038981	29377401	A	Thupl.29377401s0010	Thupl.29377401s0010.1.v3.1	Transcript	3_prime_UTR_variant	1021	NA	NA	NA	NA	NA
29377401_2039238	29377401	G	Thupl.29377401s0010	Thupl.29377401s0010.1.v3.1	Transcript	3_prime_UTR_variant	1278	NA	NA	NA	NA	NA
29377401_2101595	29377401	A	Thupl.29377401s0011	Thupl.29377401s0011.1.v3.1	Transcript	3_prime_UTR_variant	3084	NA	NA	NA	NA	NA
29377402_4312689	29377402	A	Thupl.29377402s0022	Thupl.29377402s0022.1.v3.1	Transcript	3_prime_UTR_variant	1180	NA	NA	NA	NA	NA
29377407_929923	29377407	G	Thupl.29377407s0005	Thupl.29377407s0005.1.v3.1	Transcript	3_prime_UTR_variant	1972	NA	NA	NA	NA	NA
29377418_2118361	29377418	T	Thupl.29377418s0012	Thupl.29377418s0012.1.v3.1	Transcript	3_prime_UTR_variant	1087	NA	NA	NA	NA	NA
29377418_3511536	29377418	C	Thupl.29377418s0017	Thupl.29377418s0017.1.v3.1	Transcript	3_prime_UTR_variant	4018	NA	NA	NA	NA	NA
29377418_3511556	29377418	C	Thupl.29377418s0017	Thupl.29377418s0017.1.v3.1	Transcript	3_prime_UTR_variant	4038	NA	NA	NA	NA	NA
29377419_919920	29377419	A	Thupl.29377419s0005	Thupl.29377419s0005.1.v3.1	Transcript	3_prime_UTR_variant	3255	NA	NA	NA	NA	NA
29377420_2388040	29377420	C	Thupl.29377420s0007	Thupl.29377420s0007.1.v3.1	Transcript	3_prime_UTR_variant	1627	NA	NA	NA	NA	NA
29377420_2388215	29377420	C	Thupl.29377420s0007	Thupl.29377420s0007.1.v3.1	Transcript	3_prime_UTR_variant	1452	NA	NA	NA	NA	NA
29377420_5231973	29377420	C	Thupl.29377420s0010	Thupl.29377420s0010.1.v3.1	Transcript	3_prime_UTR_variant	934	NA	NA	NA	NA	NA
29377435_680535	29377435	T	Thupl.29377435s0001	Thupl.29377435s0001.1.v3.1	Transcript	3_prime_UTR_variant	2184	NA	NA	NA	NA	NA
29377435_680791	29377435	T	Thupl.29377435s0001	Thupl.29377435s0001.1.v3.1	Transcript	3_prime_UTR_variant	2440	NA	NA	NA	NA	NA
29377435_1642470	29377435	G	Thupl.29377435s0003	Thupl.29377435s0003.1.v3.1	Transcript	3_prime_UTR_variant	3321	NA	NA	NA	NA	NA
29377437_2940240	29377437	G	Thupl.29377437s0007	Thupl.29377437s0007.1.v3.1	Transcript	3_prime_UTR_variant	940	NA	NA	NA	NA	NA
29377438_818427	29377438	G	Thupl.29377438s0002	Thupl.29377438s0002.1.v3.1	Transcript	3_prime_UTR_variant	960	NA	NA	NA	NA	NA
29377438_818462	29377438	G	Thupl.29377438s0002	Thupl.29377438s0002.1.v3.1	Transcript	3_prime_UTR_variant	995	NA	NA	NA	NA	NA
29377438_1245450	29377438	G	Thupl.29377438s0003	Thupl.29377438s0003.1.v3.1	Transcript	3_prime_UTR_variant	3876	NA	NA	NA	NA	NA
29377438_1245512	29377438	G	Thupl.29377438s0003	Thupl.29377438s0003.1.v3.1	Transcript	3_prime_UTR_variant	3938	NA	NA	NA	NA	NA
29377439_191357	29377439	C	Thupl.29377439s0002	Thupl.29377439s0002.1.v3.1	Transcript	3_prime_UTR_variant	2151	NA	NA	NA	NA	NA
29377439_496449	29377439	A	Thupl.29377439s0004	Thupl.29377439s0004.1.v3.1	Transcript	3_prime_UTR_variant	966	NA	NA	NA	NA	NA
29377439_969027	29377439	T	Thupl.29377439s0010	Thupl.29377439s0010.1.v3.1	Transcript	3_prime_UTR_variant	1008	NA	NA	NA	NA	NA
29377439_1137244	29377439	G	Thupl.29377439s0011	Thupl.29377439s0011.1.v3.1	Transcript	3_prime_UTR_variant	1010	NA	NA	NA	NA	NA
29377439_1137308	29377439	C	Thupl.29377439s0011	Thupl.29377439s0011.1.v3.1	Transcript	3_prime_UTR_variant	1074	NA	NA	NA	NA	NA
29377439_1137351	29377439	A	Thupl.29377439s0011	Thupl.29377439s0011.1.v3.1	Transcript	3_prime_UTR_variant	1117	NA	NA	NA	NA	NA
29377439_1137608	29377439	G	Thupl.29377439s0011	Thupl.29377439s0011.1.v3.1	Transcript	3_prime_UTR_variant	1374	NA	NA	NA	NA	NA
29377446_2267773	29377446	A	Thupl.29377446s0008	Thupl.29377446s0008.1.v3.1	Transcript	3_prime_UTR_variant	1870	NA	NA	NA	NA	NA
29377451_58796	29377451	A	Thupl.29377451s0001	Thupl.29377451s0001.1.v3.1	Transcript	3_prime_UTR_variant	1092	NA	NA	NA	NA	NA
29377451_971387	29377451	G	Thupl.29377451s0003	Thupl.29377451s0003.1.v3.1	Transcript	3_prime_UTR_variant	2661	NA	NA	NA	NA	NA
29377451_1452722	29377451	A	Thupl.29377451s0005	Thupl.29377451s0005.1.v3.1	Transcript	3_prime_UTR_variant	2695	NA	NA	NA	NA	NA
29377456_1333104	29377456	T	Thupl.29377456s0012	Thupl.29377456s0012.1.v3.1	Transcript	3_prime_UTR_variant	625	NA	NA	NA	NA	NA
29377456_1333106	29377456	T	Thupl.29377456s0012	Thupl.29377456s0012.1.v3.1	Transcript	3_prime_UTR_variant	623	NA	NA	NA	NA	NA
29377456_1333108	29377456	A	Thupl.29377456s0012	Thupl.29377456s0012.1.v3.1	Transcript	3_prime_UTR_variant	621	NA	NA	NA	NA	NA
29377459_448627	29377459	C	Thupl.29377459s0002	Thupl.29377459s0002.1.v3.1	Transcript	3_prime_UTR_variant	2237	NA	NA	NA	NA	NA
29377464_3122462	29377464	C	Thupl.29377464s0012	Thupl.29377464s0012.1.v3.1	Transcript	3_prime_UTR_variant	2328	NA	NA	NA	NA	NA
29377464_3122539	29377464	G	Thupl.29377464s0012	Thupl.29377464s0012.1.v3.1	Transcript	3_prime_UTR_variant	2251	NA	NA	NA	NA	NA
29377464_3883696	29377464	T	Thupl.29377464s0015	Thupl.29377464s0015.1.v3.1	Transcript	3_prime_UTR_variant	664	NA	NA	NA	NA	NA
29377464_4063681	29377464	G	Thupl.29377464s0017	Thupl.29377464s0017.1.v3.1	Transcript	3_prime_UTR_variant	2947	NA	NA	NA	NA	NA
29377465_929119	29377465	C	Thupl.29377465s0003	Thupl.29377465s0003.11.v3.1	Transcript	3_prime_UTR_variant	985	NA	NA	NA	NA	NA
29377477_15525	29377477	A	Thupl.29377477s0001	Thupl.29377477s0001.1.v3.1	Transcript	3_prime_UTR_variant	2025	NA	NA	NA	NA	NA
29377477_15526	29377477	T	Thupl.29377477s0001	Thupl.29377477s0001.1.v3.1	Transcript	3_prime_UTR_variant	2024	NA	NA	NA	NA	NA
29377477_15554	29377477	G	Thupl.29377477s0001	Thupl.29377477s0001.1.v3.1	Transcript	3_prime_UTR_variant	1996	NA	NA	NA	NA	NA
29377477_15573	29377477	C	Thupl.29377477s0001	Thupl.29377477s0001.1.v3.1	Transcript	3_prime_UTR_variant	1977	NA	NA	NA	NA	NA
29377477_15686	29377477	T	Thupl.29377477s0001	Thupl.29377477s0001.1.v3.1	Transcript	3_prime_UTR_variant	1864	NA	NA	NA	NA	NA
29377477_15777	29377477	A	Thupl.29377477s0001	Thupl.29377477s0001.1.v3.1	Transcript	3_prime_UTR_variant	1773	NA	NA	NA	NA	NA
29377477_15795	29377477	C	Thupl.29377477s0001	Thupl.29377477s0001.1.v3.1	Transcript	3_prime_UTR_variant	1755	NA	NA	NA	NA	NA
29377477_15801	29377477	A	Thupl.29377477s0001	Thupl.29377477s0001.1.v3.1	Transcript	3_prime_UTR_variant	1749	NA	NA	NA	NA	NA
29377477_281222	29377477	A	Thupl.29377477s0003	Thupl.29377477s0003.1.v3.1	Transcript	3_prime_UTR_variant	1699	NA	NA	NA	NA	NA
29377477_281226	29377477	G	Thupl.29377477s0003	Thupl.29377477s0003.1.v3.1	Transcript	3_prime_UTR_variant	1695	NA	NA	NA	NA	NA
29377477_281229	29377477	A	Thupl.29377477s0003	Thupl.29377477s0003.1.v3.1	Transcript	3_prime_UTR_variant	1692	NA	NA	NA	NA	NA
29377477_568272	29377477	A	Thupl.29377477s0004	Thupl.29377477s0004.1.v3.1	Transcript	3_prime_UTR_variant	1832	NA	NA	NA	NA	NA
29377477_568294	29377477	C	Thupl.29377477s0004	Thupl.29377477s0004.1.v3.1	Transcript	3_prime_UTR_variant	1854	NA	NA	NA	NA	NA
29377478_297948	29377478	A	Thupl.29377478s0003	Thupl.29377478s0003.1.v3.1	Transcript	3_prime_UTR_variant	2381	NA	NA	NA	NA	NA
29377478_915199	29377478	C	Thupl.29377478s0005	Thupl.29377478s0005.10.v3.1	Transcript	3_prime_UTR_variant	2901	NA	NA	NA	NA	NA
29377479_1540	29377479	A	Thupl.29377479s0001	Thupl.29377479s0001.1.v3.1	Transcript	3_prime_UTR_variant	1995	NA	NA	NA	NA	NA
29377479_404262	29377479	T	Thupl.29377479s0002	Thupl.29377479s0002.1.v3.1	Transcript	3_prime_UTR_variant	481	NA	NA	NA	NA	NA
29377479_404278	29377479	A	Thupl.29377479s0002	Thupl.29377479s0002.1.v3.1	Transcript	3_prime_UTR_variant	465	NA	NA	NA	NA	NA
29377484_359835	29377484	A	Thupl.29377484s0003	Thupl.29377484s0003.1.v3.1	Transcript	3_prime_UTR_variant	1240	NA	NA	NA	NA	NA
29377484_2196483	29377484	G	Thupl.29377484s0013	Thupl.29377484s0013.1.v3.1	Transcript	3_prime_UTR_variant	1449	NA	NA	NA	NA	NA
29377488_782784	29377488	A	Thupl.29377488s0003	Thupl.29377488s0003.1.v3.1	Transcript	3_prime_UTR_variant	1218	NA	NA	NA	NA	NA
29377488_782843	29377488	C	Thupl.29377488s0003	Thupl.29377488s0003.1.v3.1	Transcript	3_prime_UTR_variant	1159	NA	NA	NA	NA	NA
29377496_225714	29377496	A	Thupl.29377496s0005	Thupl.29377496s0005.1.v3.1	Transcript	3_prime_UTR_variant	668	NA	NA	NA	NA	NA
29377500_928546	29377500	A	Thupl.29377500s0006	Thupl.29377500s0006.1.v3.1	Transcript	3_prime_UTR_variant	2668	NA	NA	NA	NA	NA
29377506_699765	29377506	C	Thupl.29377506s0004	Thupl.29377506s0004.1.v3.1	Transcript	3_prime_UTR_variant	1439	NA	NA	NA	NA	NA
29377506_699933	29377506	T	Thupl.29377506s0004	Thupl.29377506s0004.1.v3.1	Transcript	3_prime_UTR_variant	1271	NA	NA	NA	NA	NA
29377506_699944	29377506	T	Thupl.29377506s0004	Thupl.29377506s0004.1.v3.1	Transcript	3_prime_UTR_variant	1260	NA	NA	NA	NA	NA
29377506_700005	29377506	C	Thupl.29377506s0004	Thupl.29377506s0004.1.v3.1	Transcript	3_prime_UTR_variant	1199	NA	NA	NA	NA	NA
29377507_88457	29377507	C	Thupl.29377507s0001	Thupl.29377507s0001.1.v3.1	Transcript	3_prime_UTR_variant	1522	NA	NA	NA	NA	NA
29377513_1850929	29377513	C	Thupl.29377513s0006	Thupl.29377513s0006.1.v3.1	Transcript	3_prime_UTR_variant	1207	NA	NA	NA	NA	NA
29377513_1851029	29377513	C	Thupl.29377513s0006	Thupl.29377513s0006.1.v3.1	Transcript	3_prime_UTR_variant	1107	NA	NA	NA	NA	NA
29377513_2158094	29377513	C	Thupl.29377513s0008	Thupl.29377513s0008.1.v3.1	Transcript	3_prime_UTR_variant	1799	NA	NA	NA	NA	NA
29377513_2158159	29377513	T	Thupl.29377513s0008	Thupl.29377513s0008.1.v3.1	Transcript	3_prime_UTR_variant	1734	NA	NA	NA	NA	NA
29377513_2158536	29377513	A	Thupl.29377513s0008	Thupl.29377513s0008.1.v3.1	Transcript	3_prime_UTR_variant	1357	NA	NA	NA	NA	NA
29377524_1947933	29377524	T	Thupl.29377524s0011	Thupl.29377524s0011.1.v3.1	Transcript	3_prime_UTR_variant	731	NA	NA	NA	NA	NA
29377524_1947938	29377524	T	Thupl.29377524s0011	Thupl.29377524s0011.1.v3.1	Transcript	3_prime_UTR_variant	726	NA	NA	NA	NA	NA
29377529_3414489	29377529	T	Thupl.29377529s0017	Thupl.29377529s0017.1.v3.1	Transcript	3_prime_UTR_variant	2103	NA	NA	NA	NA	NA
29377529_3414508	29377529	A	Thupl.29377529s0017	Thupl.29377529s0017.1.v3.1	Transcript	3_prime_UTR_variant	2084	NA	NA	NA	NA	NA
29377535_715521	29377535	T	Thupl.29377535s0001	Thupl.29377535s0001.3.v3.1	Transcript	3_prime_UTR_variant	5898	NA	NA	NA	NA	NA
29377535_715677	29377535	T	Thupl.29377535s0001	Thupl.29377535s0001.3.v3.1	Transcript	3_prime_UTR_variant	6054	NA	NA	NA	NA	NA
29377537_69273	29377537	T	Thupl.29377537s0001	Thupl.29377537s0001.1.v3.1	Transcript	3_prime_UTR_variant	3642	NA	NA	NA	NA	NA
29377537_2578011	29377537	A	Thupl.29377537s0009	Thupl.29377537s0009.1.v3.1	Transcript	3_prime_UTR_variant	601	NA	NA	NA	NA	NA
29377537_3439918	29377537	C	Thupl.29377537s0017	Thupl.29377537s0017.1.v3.1	Transcript	3_prime_UTR_variant	2154	NA	NA	NA	NA	NA
29377542_331659	29377542	G	Thupl.29377542s0001	Thupl.29377542s0001.1.v3.1	Transcript	3_prime_UTR_variant	1758	NA	NA	NA	NA	NA
29377542_1314380	29377542	G	Thupl.29377542s0003	Thupl.29377542s0003.1.v3.1	Transcript	3_prime_UTR_variant	719	NA	NA	NA	NA	NA
29377542_1314695	29377542	T	Thupl.29377542s0003	Thupl.29377542s0003.1.v3.1	Transcript	3_prime_UTR_variant	1034	NA	NA	NA	NA	NA
29377542_1314800	29377542	T	Thupl.29377542s0003	Thupl.29377542s0003.1.v3.1	Transcript	3_prime_UTR_variant	1139	NA	NA	NA	NA	NA
29377544_350332	29377544	T	Thupl.29377544s0005	Thupl.29377544s0005.1.v3.1	Transcript	3_prime_UTR_variant	1455	NA	NA	NA	NA	NA
29377544_424280	29377544	A	Thupl.29377544s0006	Thupl.29377544s0006.1.v3.1	Transcript	3_prime_UTR_variant	2560	NA	NA	NA	NA	NA
29377544_424449	29377544	A	Thupl.29377544s0006	Thupl.29377544s0006.1.v3.1	Transcript	3_prime_UTR_variant	2391	NA	NA	NA	NA	NA
29377544_424483	29377544	G	Thupl.29377544s0006	Thupl.29377544s0006.1.v3.1	Transcript	3_prime_UTR_variant	2357	NA	NA	NA	NA	NA
29377544_424513	29377544	C	Thupl.29377544s0006	Thupl.29377544s0006.1.v3.1	Transcript	3_prime_UTR_variant	2327	NA	NA	NA	NA	NA
29377544_424514	29377544	C	Thupl.29377544s0006	Thupl.29377544s0006.1.v3.1	Transcript	3_prime_UTR_variant	2326	NA	NA	NA	NA	NA
29377546_21081	29377546	T	Thupl.29377546s0001	Thupl.29377546s0001.1.v3.1	Transcript	3_prime_UTR_variant	2316	NA	NA	NA	NA	NA
29377552_868120	29377552	C	Thupl.29377552s0003	Thupl.29377552s0003.1.v3.1	Transcript	3_prime_UTR_variant	2835	NA	NA	NA	NA	NA
29377552_868128	29377552	T	Thupl.29377552s0003	Thupl.29377552s0003.1.v3.1	Transcript	3_prime_UTR_variant	2827	NA	NA	NA	NA	NA
29377556_171773	29377556	C	Thupl.29377556s0002	Thupl.29377556s0002.1.v3.1	Transcript	3_prime_UTR_variant	1120	NA	NA	NA	NA	NA
29377559_985031	29377559	C	Thupl.29377559s0001	Thupl.29377559s0001.1.v3.1	Transcript	3_prime_UTR_variant	745	NA	NA	NA	NA	NA
29377559_985062	29377559	C	Thupl.29377559s0001	Thupl.29377559s0001.1.v3.1	Transcript	3_prime_UTR_variant	776	NA	NA	NA	NA	NA
29377559_2742523	29377559	G	Thupl.29377559s0011	Thupl.29377559s0011.1.v3.1	Transcript	3_prime_UTR_variant	1810	NA	NA	NA	NA	NA
29377559_3151395	29377559	C	Thupl.29377559s0012	Thupl.29377559s0012.1.v3.1	Transcript	3_prime_UTR_variant	1853	NA	NA	NA	NA	NA
29377559_3630312	29377559	A	Thupl.29377559s0016	Thupl.29377559s0016.1.v3.1	Transcript	3_prime_UTR_variant	1081	NA	NA	NA	NA	NA
29377559_3630523	29377559	G	Thupl.29377559s0016	Thupl.29377559s0016.1.v3.1	Transcript	3_prime_UTR_variant	1292	NA	NA	NA	NA	NA
29377560_902832	29377560	T	Thupl.29377560s0006	Thupl.29377560s0006.1.v3.1	Transcript	3_prime_UTR_variant	7282	NA	NA	NA	NA	NA
29377560_993441	29377560	G	Thupl.29377560s0009	Thupl.29377560s0009.1.v3.1	Transcript	3_prime_UTR_variant	1871	NA	NA	NA	NA	NA
29377572_51655	29377572	A	Thupl.29377572s0001	Thupl.29377572s0001.1.v3.1	Transcript	3_prime_UTR_variant	3074	NA	NA	NA	NA	NA
29377578_2209294	29377578	A	Thupl.29377578s0004	Thupl.29377578s0004.1.v3.1	Transcript	3_prime_UTR_variant	6940	NA	NA	NA	NA	NA
29377578_2209297	29377578	A	Thupl.29377578s0004	Thupl.29377578s0004.1.v3.1	Transcript	3_prime_UTR_variant	6943	NA	NA	NA	NA	NA
29377580_1574327	29377580	C	Thupl.29377580s0006	Thupl.29377580s0006.1.v3.1	Transcript	3_prime_UTR_variant	1330	NA	NA	NA	NA	NA
29377580_1574370	29377580	T	Thupl.29377580s0006	Thupl.29377580s0006.1.v3.1	Transcript	3_prime_UTR_variant	1287	NA	NA	NA	NA	NA
29377583_1285669	29377583	C	Thupl.29377583s0010	Thupl.29377583s0010.1.v3.1	Transcript	3_prime_UTR_variant	1241	NA	NA	NA	NA	NA
29377583_3118995	29377583	T	Thupl.29377583s0018	Thupl.29377583s0018.1.v3.1	Transcript	3_prime_UTR_variant	1861	NA	NA	NA	NA	NA
29377583_3119059	29377583	T	Thupl.29377583s0018	Thupl.29377583s0018.1.v3.1	Transcript	3_prime_UTR_variant	1925	NA	NA	NA	NA	NA
29377583_3119098	29377583	T	Thupl.29377583s0018	Thupl.29377583s0018.1.v3.1	Transcript	3_prime_UTR_variant	1964	NA	NA	NA	NA	NA
29377584_628176	29377584	G	Thupl.29377584s0003	Thupl.29377584s0003.1.v3.1	Transcript	3_prime_UTR_variant	3396	NA	NA	NA	NA	NA
29377584_628236	29377584	G	Thupl.29377584s0003	Thupl.29377584s0003.1.v3.1	Transcript	3_prime_UTR_variant	3456	NA	NA	NA	NA	NA
29377587_1165908	29377587	C	Thupl.29377587s0003	Thupl.29377587s0003.1.v3.1	Transcript	3_prime_UTR_variant	2052	NA	NA	NA	NA	NA
29377587_3188623	29377587	C	Thupl.29377587s0009	Thupl.29377587s0009.1.v3.1	Transcript	3_prime_UTR_variant	1742	NA	NA	NA	NA	NA
29377600_1018505	29377600	A	Thupl.29377600s0003	Thupl.29377600s0003.1.v3.1	Transcript	3_prime_UTR_variant	1118	NA	NA	NA	NA	NA
29377600_1018506	29377600	A	Thupl.29377600s0003	Thupl.29377600s0003.1.v3.1	Transcript	3_prime_UTR_variant	1117	NA	NA	NA	NA	NA
29377605_328064	29377605	C	Thupl.29377605s0002	Thupl.29377605s0002.1.v3.1	Transcript	3_prime_UTR_variant	1400	NA	NA	NA	NA	NA
29377609_320933	29377609	A	Thupl.29377609s0002	Thupl.29377609s0002.1.v3.1	Transcript	3_prime_UTR_variant	2289	NA	NA	NA	NA	NA
29377609_2255350	29377609	A	Thupl.29377609s0007	Thupl.29377609s0007.1.v3.1	Transcript	3_prime_UTR_variant	1159	NA	NA	NA	NA	NA
29377609_2255379	29377609	C	Thupl.29377609s0007	Thupl.29377609s0007.1.v3.1	Transcript	3_prime_UTR_variant	1130	NA	NA	NA	NA	NA
29377609_2610169	29377609	G	Thupl.29377609s0009	Thupl.29377609s0009.1.v3.1	Transcript	3_prime_UTR_variant	967	NA	NA	NA	NA	NA
29377609_2610190	29377609	A	Thupl.29377609s0009	Thupl.29377609s0009.1.v3.1	Transcript	3_prime_UTR_variant	988	NA	NA	NA	NA	NA
29377609_2610211	29377609	A	Thupl.29377609s0009	Thupl.29377609s0009.1.v3.1	Transcript	3_prime_UTR_variant	1009	NA	NA	NA	NA	NA
29377625_209427	29377625	C	Thupl.29377625s0003	Thupl.29377625s0003.1.v3.1	Transcript	3_prime_UTR_variant	666	NA	NA	NA	NA	NA
29377647_673604	29377647	T	Thupl.29377647s0004	Thupl.29377647s0004.1.v3.1	Transcript	3_prime_UTR_variant	4067	NA	NA	NA	NA	NA
29377658_2309043	29377658	C	Thupl.29377658s0011	Thupl.29377658s0011.1.v3.1	Transcript	3_prime_UTR_variant	3703	NA	NA	NA	NA	NA
29377658_2309087	29377658	A	Thupl.29377658s0011	Thupl.29377658s0011.1.v3.1	Transcript	3_prime_UTR_variant	3659	NA	NA	NA	NA	NA
29377658_2309274	29377658	C	Thupl.29377658s0011	Thupl.29377658s0011.1.v3.1	Transcript	3_prime_UTR_variant	3472	NA	NA	NA	NA	NA
29377668_209152	29377668	C	Thupl.29377668s0003	Thupl.29377668s0003.1.v3.1	Transcript	3_prime_UTR_variant	1708	NA	NA	NA	NA	NA
29377668_702179	29377668	C	Thupl.29377668s0005	Thupl.29377668s0005.1.v3.1	Transcript	3_prime_UTR_variant	7458	NA	NA	NA	NA	NA
29377672_1177735	29377672	T	Thupl.29377672s0006	Thupl.29377672s0006.1.v3.1	Transcript	3_prime_UTR_variant	1383	NA	NA	NA	NA	NA
29377683_614339	29377683	G	Thupl.29377683s0005	Thupl.29377683s0005.1.v3.1	Transcript	3_prime_UTR_variant	987	NA	NA	NA	NA	NA
29377683_3046121	29377683	C	Thupl.29377683s0023	Thupl.29377683s0023.1.v3.1	Transcript	3_prime_UTR_variant	4588	NA	NA	NA	NA	NA
29377685_239417	29377685	G	Thupl.29377685s0003	Thupl.29377685s0003.1.v3.1	Transcript	3_prime_UTR_variant	2374	NA	NA	NA	NA	NA
29377687_4872201	29377687	C	Thupl.29377687s0028	Thupl.29377687s0028.1.v3.1	Transcript	3_prime_UTR_variant	1545	NA	NA	NA	NA	NA
29377689_526761	29377689	C	Thupl.29377689s0005	Thupl.29377689s0005.1.v3.1	Transcript	3_prime_UTR_variant	1209	NA	NA	NA	NA	NA
29377690_1873463	29377690	G	Thupl.29377690s0010	Thupl.29377690s0010.1.v3.1	Transcript	3_prime_UTR_variant	6438	NA	NA	NA	NA	NA
29377690_1873468	29377690	A	Thupl.29377690s0010	Thupl.29377690s0010.1.v3.1	Transcript	3_prime_UTR_variant	6443	NA	NA	NA	NA	NA
29377690_1873525	29377690	C	Thupl.29377690s0010	Thupl.29377690s0010.1.v3.1	Transcript	3_prime_UTR_variant	6500	NA	NA	NA	NA	NA
29377693_2173132	29377693	C	Thupl.29377693s0009	Thupl.29377693s0009.1.v3.1	Transcript	3_prime_UTR_variant	2611	NA	NA	NA	NA	NA
29377696_3073523	29377696	T	Thupl.29377696s0011	Thupl.29377696s0011.1.v3.1	Transcript	3_prime_UTR_variant	465	NA	NA	NA	NA	NA
29377696_3073566	29377696	T	Thupl.29377696s0011	Thupl.29377696s0011.1.v3.1	Transcript	3_prime_UTR_variant	508	NA	NA	NA	NA	NA
29377703_366805	29377703	A	Thupl.29377703s0002	Thupl.29377703s0002.1.v3.1	Transcript	3_prime_UTR_variant	1170	NA	NA	NA	NA	NA
29377707_807946	29377707	G	Thupl.29377707s0006	Thupl.29377707s0006.1.v3.1	Transcript	3_prime_UTR_variant	1757	NA	NA	NA	NA	NA
29377707_807951	29377707	T	Thupl.29377707s0006	Thupl.29377707s0006.1.v3.1	Transcript	3_prime_UTR_variant	1752	NA	NA	NA	NA	NA
29377713_242555	29377713	T	Thupl.29377713s0001	Thupl.29377713s0001.1.v3.1	Transcript	3_prime_UTR_variant	2663	NA	NA	NA	NA	NA
29377713_250694	29377713	C	Thupl.29377713s0001	Thupl.29377713s0001.4.v3.1	Transcript	3_prime_UTR_variant	2624	NA	NA	NA	NA	NA
29377713_250885	29377713	T	Thupl.29377713s0001	Thupl.29377713s0001.1.v3.1	Transcript	3_prime_UTR_variant	2857	NA	NA	NA	NA	NA
29377721_1773873	29377721	T	Thupl.29377721s0012	Thupl.29377721s0012.1.v3.1	Transcript	3_prime_UTR_variant	588	NA	NA	NA	NA	NA
29377726_565302	29377726	A	Thupl.29377726s0003	Thupl.29377726s0003.1.v3.1	Transcript	3_prime_UTR_variant	906	NA	NA	NA	NA	NA
29377726_565412	29377726	G	Thupl.29377726s0003	Thupl.29377726s0003.1.v3.1	Transcript	3_prime_UTR_variant	1016	NA	NA	NA	NA	NA
29377731_892326	29377731	T	Thupl.29377731s0006	Thupl.29377731s0006.3.v3.1	Transcript	3_prime_UTR_variant	1356	NA	NA	NA	NA	NA
29377731_911743	29377731	A	Thupl.29377731s0006	Thupl.29377731s0006.1.v3.1	Transcript	3_prime_UTR_variant	1879	NA	NA	NA	NA	NA
29377737_384015	29377737	C	Thupl.29377737s0003	Thupl.29377737s0003.1.v3.1	Transcript	3_prime_UTR_variant	939	NA	NA	NA	NA	NA
29377741_319106	29377741	G	Thupl.29377741s0002	Thupl.29377741s0002.1.v3.1	Transcript	3_prime_UTR_variant	594	NA	NA	NA	NA	NA
29377742_2405183	29377742	C	Thupl.29377742s0007	Thupl.29377742s0007.1.v3.1	Transcript	3_prime_UTR_variant	1805	NA	NA	NA	NA	NA
29377742_2405235	29377742	C	Thupl.29377742s0007	Thupl.29377742s0007.1.v3.1	Transcript	3_prime_UTR_variant	1857	NA	NA	NA	NA	NA
29377742_2405282	29377742	G	Thupl.29377742s0007	Thupl.29377742s0007.1.v3.1	Transcript	3_prime_UTR_variant	1904	NA	NA	NA	NA	NA
29377744_1089228	29377744	T	Thupl.29377744s0019	Thupl.29377744s0019.1.v3.1	Transcript	3_prime_UTR_variant	975	NA	NA	NA	NA	NA
29377744_1089314	29377744	G	Thupl.29377744s0019	Thupl.29377744s0019.1.v3.1	Transcript	3_prime_UTR_variant	1061	NA	NA	NA	NA	NA
29377745_442314	29377745	A	Thupl.29377745s0003	Thupl.29377745s0003.1.v3.1	Transcript	3_prime_UTR_variant	1061	NA	NA	NA	NA	NA
29377745_1570343	29377745	A	Thupl.29377745s0011	Thupl.29377745s0011.1.v3.1	Transcript	3_prime_UTR_variant	2578	NA	NA	NA	NA	NA
29377745_1769537	29377745	A	Thupl.29377745s0013	Thupl.29377745s0013.1.v3.1	Transcript	3_prime_UTR_variant	1752	NA	NA	NA	NA	NA
29377749_3829031	29377749	C	Thupl.29377749s0008	Thupl.29377749s0008.1.v3.1	Transcript	3_prime_UTR_variant	775	NA	NA	NA	NA	NA
29377750_1842952	29377750	A	Thupl.29377750s0009	Thupl.29377750s0009.1.v3.1	Transcript	3_prime_UTR_variant	2163	NA	NA	NA	NA	NA
29377761_86425	29377761	C	Thupl.29377761s0002	Thupl.29377761s0002.1.v3.1	Transcript	3_prime_UTR_variant	2618	NA	NA	NA	NA	NA
29377761_86428	29377761	T	Thupl.29377761s0002	Thupl.29377761s0002.1.v3.1	Transcript	3_prime_UTR_variant	2621	NA	NA	NA	NA	NA
29377762_1257853	29377762	G	Thupl.29377762s0010	Thupl.29377762s0010.1.v3.1	Transcript	3_prime_UTR_variant	1597	NA	NA	NA	NA	NA
29377763_59325	29377763	C	Thupl.29377763s0001	Thupl.29377763s0001.1.v3.1	Transcript	3_prime_UTR_variant	3178	NA	NA	NA	NA	NA
29377763_755491	29377763	T	Thupl.29377763s0003	Thupl.29377763s0003.1.v3.1	Transcript	3_prime_UTR_variant	2198	NA	NA	NA	NA	NA
29377763_755513	29377763	C	Thupl.29377763s0003	Thupl.29377763s0003.1.v3.1	Transcript	3_prime_UTR_variant	2176	NA	NA	NA	NA	NA
29377763_755527	29377763	T	Thupl.29377763s0003	Thupl.29377763s0003.1.v3.1	Transcript	3_prime_UTR_variant	2162	NA	NA	NA	NA	NA
29377768_4091510	29377768	C	Thupl.29377768s0020	Thupl.29377768s0020.3.v3.1	Transcript	3_prime_UTR_variant	1620	NA	NA	NA	NA	NA
29377770_324465	29377770	G	Thupl.29377770s0001	Thupl.29377770s0001.1.v3.1	Transcript	3_prime_UTR_variant	1799	NA	NA	NA	NA	NA
29377770_324485	29377770	A	Thupl.29377770s0001	Thupl.29377770s0001.1.v3.1	Transcript	3_prime_UTR_variant	1779	NA	NA	NA	NA	NA
29377770_806343	29377770	A	Thupl.29377770s0003	Thupl.29377770s0003.1.v3.1	Transcript	3_prime_UTR_variant	1797	NA	NA	NA	NA	NA
29377770_806383	29377770	G	Thupl.29377770s0003	Thupl.29377770s0003.1.v3.1	Transcript	3_prime_UTR_variant	1757	NA	NA	NA	NA	NA
29377770_806400	29377770	C	Thupl.29377770s0003	Thupl.29377770s0003.1.v3.1	Transcript	3_prime_UTR_variant	1740	NA	NA	NA	NA	NA
29377770_806420	29377770	T	Thupl.29377770s0003	Thupl.29377770s0003.1.v3.1	Transcript	3_prime_UTR_variant	1720	NA	NA	NA	NA	NA
29377775_597770	29377775	T	Thupl.29377775s0002	Thupl.29377775s0002.1.v3.1	Transcript	3_prime_UTR_variant	2047	NA	NA	NA	NA	NA
29377775_597799	29377775	C	Thupl.29377775s0002	Thupl.29377775s0002.1.v3.1	Transcript	3_prime_UTR_variant	2076	NA	NA	NA	NA	NA
29377777_491597	29377777	C	Thupl.29377777s0002	Thupl.29377777s0002.1.v3.1	Transcript	3_prime_UTR_variant	3895	NA	NA	NA	NA	NA
29377777_491651	29377777	C	Thupl.29377777s0002	Thupl.29377777s0002.1.v3.1	Transcript	3_prime_UTR_variant	3949	NA	NA	NA	NA	NA
29377779_695398	29377779	T	Thupl.29377779s0003	Thupl.29377779s0003.1.v3.1	Transcript	3_prime_UTR_variant	1218	NA	NA	NA	NA	NA
29377781_1747600	29377781	A	Thupl.29377781s0010	Thupl.29377781s0010.1.v3.1	Transcript	3_prime_UTR_variant	1239	NA	NA	NA	NA	NA
29377784_3815640	29377784	G	Thupl.29377784s0013	Thupl.29377784s0013.1.v3.1	Transcript	3_prime_UTR_variant	1425	NA	NA	NA	NA	NA
29377784_3815672	29377784	T	Thupl.29377784s0013	Thupl.29377784s0013.1.v3.1	Transcript	3_prime_UTR_variant	1457	NA	NA	NA	NA	NA
29377784_3815716	29377784	C	Thupl.29377784s0013	Thupl.29377784s0013.1.v3.1	Transcript	3_prime_UTR_variant	1501	NA	NA	NA	NA	NA
29377790_5465182	29377790	T	Thupl.29377790s0020	Thupl.29377790s0020.1.v3.1	Transcript	3_prime_UTR_variant	2920	NA	NA	NA	NA	NA
29377790_5465215	29377790	A	Thupl.29377790s0020	Thupl.29377790s0020.1.v3.1	Transcript	3_prime_UTR_variant	2953	NA	NA	NA	NA	NA
29377791_747322	29377791	T	Thupl.29377791s0003	Thupl.29377791s0003.1.v3.1	Transcript	3_prime_UTR_variant	4050	NA	NA	NA	NA	NA
29377793_439549	29377793	A	Thupl.29377793s0003	Thupl.29377793s0003.1.v3.1	Transcript	3_prime_UTR_variant	811	NA	NA	NA	NA	NA
29377794_11053	29377794	T	Thupl.29377794s0001	Thupl.29377794s0001.1.v3.1	Transcript	3_prime_UTR_variant	2059	NA	NA	NA	NA	NA
29377794_11082	29377794	T	Thupl.29377794s0001	Thupl.29377794s0001.1.v3.1	Transcript	3_prime_UTR_variant	2030	NA	NA	NA	NA	NA
29377794_754985	29377794	A	Thupl.29377794s0005	Thupl.29377794s0005.1.v3.1	Transcript	3_prime_UTR_variant	1367	NA	NA	NA	NA	NA
29377796_442044	29377796	A	Thupl.29377796s0004	Thupl.29377796s0004.1.v3.1	Transcript	3_prime_UTR_variant	2154	NA	NA	NA	NA	NA
29377796_442073	29377796	A	Thupl.29377796s0004	Thupl.29377796s0004.1.v3.1	Transcript	3_prime_UTR_variant	2125	NA	NA	NA	NA	NA
29377796_442092	29377796	C	Thupl.29377796s0004	Thupl.29377796s0004.1.v3.1	Transcript	3_prime_UTR_variant	2106	NA	NA	NA	NA	NA
29377796_1301289	29377796	A	Thupl.29377796s0007	Thupl.29377796s0007.1.v3.1	Transcript	3_prime_UTR_variant	1667	NA	NA	NA	NA	NA
29377805_1026808	29377805	G	Thupl.29377805s0006	Thupl.29377805s0006.1.v3.1	Transcript	3_prime_UTR_variant	2425	NA	NA	NA	NA	NA
29377813_696744	29377813	G	Thupl.29377813s0003	Thupl.29377813s0003.1.v3.1	Transcript	3_prime_UTR_variant	939	NA	NA	NA	NA	NA
29377818_828958	29377818	G	Thupl.29377818s0003	Thupl.29377818s0003.1.v3.1	Transcript	3_prime_UTR_variant	914	NA	NA	NA	NA	NA
29377832_1825327	29377832	A	Thupl.29377832s0018	Thupl.29377832s0018.1.v3.1	Transcript	3_prime_UTR_variant	2311	NA	NA	NA	NA	NA
29377832_1825378	29377832	G	Thupl.29377832s0018	Thupl.29377832s0018.1.v3.1	Transcript	3_prime_UTR_variant	2362	NA	NA	NA	NA	NA
29377832_1825413	29377832	C	Thupl.29377832s0018	Thupl.29377832s0018.1.v3.1	Transcript	3_prime_UTR_variant	2397	NA	NA	NA	NA	NA
29377832_1825476	29377832	G	Thupl.29377832s0018	Thupl.29377832s0018.1.v3.1	Transcript	3_prime_UTR_variant	2460	NA	NA	NA	NA	NA
29377832_1825506	29377832	A	Thupl.29377832s0018	Thupl.29377832s0018.1.v3.1	Transcript	3_prime_UTR_variant	2490	NA	NA	NA	NA	NA
29377832_1825559	29377832	G	Thupl.29377832s0018	Thupl.29377832s0018.1.v3.1	Transcript	3_prime_UTR_variant	2543	NA	NA	NA	NA	NA
29377837_425903	29377837	T	Thupl.29377837s0002	Thupl.29377837s0002.1.v3.1	Transcript	3_prime_UTR_variant	688	NA	NA	NA	NA	NA
29377840_218900	29377840	G	Thupl.29377840s0003	Thupl.29377840s0003.1.v3.1	Transcript	3_prime_UTR_variant	2707	NA	NA	NA	NA	NA
29377840_754049	29377840	G	Thupl.29377840s0009	Thupl.29377840s0009.1.v3.1	Transcript	3_prime_UTR_variant	553	NA	NA	NA	NA	NA
29377840_754055	29377840	C	Thupl.29377840s0009	Thupl.29377840s0009.1.v3.1	Transcript	3_prime_UTR_variant	559	NA	NA	NA	NA	NA
29377840_955858	29377840	A	Thupl.29377840s0011	Thupl.29377840s0011.1.v3.1	Transcript	3_prime_UTR_variant	1934	NA	NA	NA	NA	NA
29377843_135887	29377843	G	Thupl.29377843s0001	Thupl.29377843s0001.1.v3.1	Transcript	3_prime_UTR_variant	2046	NA	NA	NA	NA	NA
29377843_450270	29377843	C	Thupl.29377843s0002	Thupl.29377843s0002.1.v3.1	Transcript	3_prime_UTR_variant	1139	NA	NA	NA	NA	NA
29377860_622461	29377860	G	Thupl.29377860s0008	Thupl.29377860s0008.1.v3.1	Transcript	3_prime_UTR_variant	560	NA	NA	NA	NA	NA
29377860_622464	29377860	C	Thupl.29377860s0008	Thupl.29377860s0008.1.v3.1	Transcript	3_prime_UTR_variant	557	NA	NA	NA	NA	NA
29377863_16582	29377863	T	Thupl.29377863s0001	Thupl.29377863s0001.1.v3.1	Transcript	3_prime_UTR_variant	2179	NA	NA	NA	NA	NA
29377865_53145	29377865	A	Thupl.29377865s0001	Thupl.29377865s0001.1.v3.1	Transcript	3_prime_UTR_variant	3376	NA	NA	NA	NA	NA
29377867_532294	29377867	C	Thupl.29377867s0004	Thupl.29377867s0004.1.v3.1	Transcript	3_prime_UTR_variant	1480	NA	NA	NA	NA	NA
29377867_532323	29377867	A	Thupl.29377867s0004	Thupl.29377867s0004.1.v3.1	Transcript	3_prime_UTR_variant	1509	NA	NA	NA	NA	NA
29377872_860696	29377872	C	Thupl.29377872s0002	Thupl.29377872s0002.1.v3.1	Transcript	3_prime_UTR_variant	3179	NA	NA	NA	NA	NA
29377872_860705	29377872	C	Thupl.29377872s0002	Thupl.29377872s0002.1.v3.1	Transcript	3_prime_UTR_variant	3188	NA	NA	NA	NA	NA
29377872_860722	29377872	G	Thupl.29377872s0002	Thupl.29377872s0002.1.v3.1	Transcript	3_prime_UTR_variant	3205	NA	NA	NA	NA	NA
29377880_3264314	29377880	T	Thupl.29377880s0013	Thupl.29377880s0013.1.v3.1	Transcript	3_prime_UTR_variant	955	NA	NA	NA	NA	NA
29377894_327121	29377894	C	Thupl.29377894s0002	Thupl.29377894s0002.1.v3.1	Transcript	3_prime_UTR_variant	2401	NA	NA	NA	NA	NA
29377894_327125	29377894	G	Thupl.29377894s0002	Thupl.29377894s0002.1.v3.1	Transcript	3_prime_UTR_variant	2405	NA	NA	NA	NA	NA
29377894_327127	29377894	A	Thupl.29377894s0002	Thupl.29377894s0002.1.v3.1	Transcript	3_prime_UTR_variant	2407	NA	NA	NA	NA	NA
29377894_327278	29377894	C	Thupl.29377894s0002	Thupl.29377894s0002.1.v3.1	Transcript	3_prime_UTR_variant	2558	NA	NA	NA	NA	NA
29377896_1443656	29377896	C	Thupl.29377896s0006	Thupl.29377896s0006.1.v3.1	Transcript	3_prime_UTR_variant	1383	NA	NA	NA	NA	NA
29377896_3971267	29377896	C	Thupl.29377896s0013	Thupl.29377896s0013.5.v3.1	Transcript	3_prime_UTR_variant	2554	NA	NA	NA	NA	NA
29377896_3971332	29377896	G	Thupl.29377896s0013	Thupl.29377896s0013.5.v3.1	Transcript	3_prime_UTR_variant	2489	NA	NA	NA	NA	NA
29377905_372190	29377905	G	Thupl.29377905s0004	Thupl.29377905s0004.1.v3.1	Transcript	3_prime_UTR_variant	2598	NA	NA	NA	NA	NA
29377905_372232	29377905	C	Thupl.29377905s0004	Thupl.29377905s0004.1.v3.1	Transcript	3_prime_UTR_variant	2640	NA	NA	NA	NA	NA
29377905_372277	29377905	A	Thupl.29377905s0004	Thupl.29377905s0004.1.v3.1	Transcript	3_prime_UTR_variant	2685	NA	NA	NA	NA	NA
29377905_372377	29377905	C	Thupl.29377905s0004	Thupl.29377905s0004.1.v3.1	Transcript	3_prime_UTR_variant	2785	NA	NA	NA	NA	NA
29377931_1428489	29377931	A	Thupl.29377931s0008	Thupl.29377931s0008.1.v3.1	Transcript	3_prime_UTR_variant	2283	NA	NA	NA	NA	NA
29377937_1039182	29377937	C	Thupl.29377937s0003	Thupl.29377937s0003.1.v3.1	Transcript	3_prime_UTR_variant	1383	NA	NA	NA	NA	NA
29377945_251145	29377945	C	Thupl.29377945s0003	Thupl.29377945s0003.1.v3.1	Transcript	3_prime_UTR_variant	1534	NA	NA	NA	NA	NA
29377945_251147	29377945	A	Thupl.29377945s0003	Thupl.29377945s0003.1.v3.1	Transcript	3_prime_UTR_variant	1532	NA	NA	NA	NA	NA
29377945_251187	29377945	G	Thupl.29377945s0003	Thupl.29377945s0003.1.v3.1	Transcript	3_prime_UTR_variant	1492	NA	NA	NA	NA	NA
29377954_1095519	29377954	T	Thupl.29377954s0003	Thupl.29377954s0003.1.v3.1	Transcript	3_prime_UTR_variant	1587	NA	NA	NA	NA	NA
29377954_1095537	29377954	G	Thupl.29377954s0003	Thupl.29377954s0003.1.v3.1	Transcript	3_prime_UTR_variant	1569	NA	NA	NA	NA	NA
29377955_3305059	29377955	T	Thupl.29377955s0020	Thupl.29377955s0020.1.v3.1	Transcript	3_prime_UTR_variant	3129	NA	NA	NA	NA	NA
29377959_1414348	29377959	C	Thupl.29377959s0003	Thupl.29377959s0003.1.v3.1	Transcript	3_prime_UTR_variant	3754	NA	NA	NA	NA	NA
29377973_294967	29377973	G	Thupl.29377973s0001	Thupl.29377973s0001.1.v3.1	Transcript	3_prime_UTR_variant	903	NA	NA	NA	NA	NA
29377975_685620	29377975	A	Thupl.29377975s0004	Thupl.29377975s0004.1.v3.1	Transcript	3_prime_UTR_variant	3688	NA	NA	NA	NA	NA
29377975_685660	29377975	G	Thupl.29377975s0004	Thupl.29377975s0004.1.v3.1	Transcript	3_prime_UTR_variant	3728	NA	NA	NA	NA	NA
29377981_257824	29377981	A	Thupl.29377981s0002	Thupl.29377981s0002.1.v3.1	Transcript	3_prime_UTR_variant	2834	NA	NA	NA	NA	NA
29377992_680902	29377992	A	Thupl.29377992s0003	Thupl.29377992s0003.1.v3.1	Transcript	3_prime_UTR_variant	10933	NA	NA	NA	NA	NA
29377992_680969	29377992	C	Thupl.29377992s0003	Thupl.29377992s0003.1.v3.1	Transcript	3_prime_UTR_variant	11000	NA	NA	NA	NA	NA
29377995_2817559	29377995	G	Thupl.29377995s0005	Thupl.29377995s0005.1.v3.1	Transcript	3_prime_UTR_variant	952	NA	NA	NA	NA	NA
29377995_2817571	29377995	G	Thupl.29377995s0005	Thupl.29377995s0005.1.v3.1	Transcript	3_prime_UTR_variant	940	NA	NA	NA	NA	NA
29378002_82353	29378002	C	Thupl.29378002s0001	Thupl.29378002s0001.1.v3.1	Transcript	3_prime_UTR_variant	588	NA	NA	NA	NA	NA
29378002_82534	29378002	G	Thupl.29378002s0001	Thupl.29378002s0001.1.v3.1	Transcript	3_prime_UTR_variant	769	NA	NA	NA	NA	NA
29378002_82552	29378002	T	Thupl.29378002s0001	Thupl.29378002s0001.1.v3.1	Transcript	3_prime_UTR_variant	787	NA	NA	NA	NA	NA
29378002_266264	29378002	C	Thupl.29378002s0003	Thupl.29378002s0003.1.v3.1	Transcript	3_prime_UTR_variant	4064	NA	NA	NA	NA	NA
29378002_266353	29378002	T	Thupl.29378002s0003	Thupl.29378002s0003.1.v3.1	Transcript	3_prime_UTR_variant	3975	NA	NA	NA	NA	NA
29378005_193774	29378005	T	Thupl.29378005s0001	Thupl.29378005s0001.1.v3.1	Transcript	3_prime_UTR_variant	1621	NA	NA	NA	NA	NA
29378005_193809	29378005	A	Thupl.29378005s0001	Thupl.29378005s0001.1.v3.1	Transcript	3_prime_UTR_variant	1656	NA	NA	NA	NA	NA
29378005_194030	29378005	A	Thupl.29378005s0001	Thupl.29378005s0001.1.v3.1	Transcript	3_prime_UTR_variant	1877	NA	NA	NA	NA	NA
29378005_194078	29378005	T	Thupl.29378005s0001	Thupl.29378005s0001.1.v3.1	Transcript	3_prime_UTR_variant	1925	NA	NA	NA	NA	NA
29378005_194084	29378005	G	Thupl.29378005s0001	Thupl.29378005s0001.1.v3.1	Transcript	3_prime_UTR_variant	1931	NA	NA	NA	NA	NA
29378009_1478569	29378009	A	Thupl.29378009s0005	Thupl.29378009s0005.1.v3.1	Transcript	3_prime_UTR_variant	800	NA	NA	NA	NA	NA
29378009_1813765	29378009	C	Thupl.29378009s0007	Thupl.29378009s0007.1.v3.1	Transcript	3_prime_UTR_variant	2153	NA	NA	NA	NA	NA
29378009_2251428	29378009	A	Thupl.29378009s0010	Thupl.29378009s0010.1.v3.1	Transcript	3_prime_UTR_variant	4692	NA	NA	NA	NA	NA
29378015_2114192	29378015	C	Thupl.29378015s0010	Thupl.29378015s0010.1.v3.1	Transcript	3_prime_UTR_variant	1471	NA	NA	NA	NA	NA
29378015_3526975	29378015	G	Thupl.29378015s0019	Thupl.29378015s0019.1.v3.1	Transcript	3_prime_UTR_variant	1210	NA	NA	NA	NA	NA
29378015_3526987	29378015	G	Thupl.29378015s0019	Thupl.29378015s0019.1.v3.1	Transcript	3_prime_UTR_variant	1222	NA	NA	NA	NA	NA
29378015_4216712	29378015	T	Thupl.29378015s0024	Thupl.29378015s0024.1.v3.1	Transcript	3_prime_UTR_variant	2162	NA	NA	NA	NA	NA
29378015_4216745	29378015	A	Thupl.29378015s0024	Thupl.29378015s0024.1.v3.1	Transcript	3_prime_UTR_variant	2195	NA	NA	NA	NA	NA
29378023_2418648	29378023	T	Thupl.29378023s0008	Thupl.29378023s0008.1.v3.1	Transcript	3_prime_UTR_variant	1968	NA	NA	NA	NA	NA
29378028_3091525	29378028	A	Thupl.29378028s0014	Thupl.29378028s0014.1.v3.1	Transcript	3_prime_UTR_variant	2887	NA	NA	NA	NA	NA
29378036_413161	29378036	T	Thupl.29378036s0003	Thupl.29378036s0003.1.v3.1	Transcript	3_prime_UTR_variant	486	NA	NA	NA	NA	NA
29378043_890190	29378043	T	Thupl.29378043s0003	Thupl.29378043s0003.1.v3.1	Transcript	3_prime_UTR_variant	1468	NA	NA	NA	NA	NA
29378043_1193028	29378043	G	Thupl.29378043s0006	Thupl.29378043s0006.1.v3.1	Transcript	3_prime_UTR_variant	2497	NA	NA	NA	NA	NA
29378048_378722	29378048	A	Thupl.29378048s0005	Thupl.29378048s0005.1.v3.1	Transcript	3_prime_UTR_variant	2215	NA	NA	NA	NA	NA
29378048_378724	29378048	T	Thupl.29378048s0005	Thupl.29378048s0005.1.v3.1	Transcript	3_prime_UTR_variant	2213	NA	NA	NA	NA	NA
29378048_1025541	29378048	T	Thupl.29378048s0006	Thupl.29378048s0006.1.v3.1	Transcript	3_prime_UTR_variant	2622	NA	NA	NA	NA	NA
29378052_3909075	29378052	C	Thupl.29378052s0029	Thupl.29378052s0029.1.v3.1	Transcript	3_prime_UTR_variant	732	NA	NA	NA	NA	NA
29378054_1799062	29378054	A	Thupl.29378054s0005	Thupl.29378054s0005.1.v3.1	Transcript	3_prime_UTR_variant	578	NA	NA	NA	NA	NA
29378054_1799130	29378054	A	Thupl.29378054s0005	Thupl.29378054s0005.1.v3.1	Transcript	3_prime_UTR_variant	646	NA	NA	NA	NA	NA
29378057_251571	29378057	T	Thupl.29378057s0002	Thupl.29378057s0002.1.v3.1	Transcript	3_prime_UTR_variant	1789	NA	NA	NA	NA	NA
29378059_79152	29378059	G	Thupl.29378059s0001	Thupl.29378059s0001.1.v3.1	Transcript	3_prime_UTR_variant	6757	NA	NA	NA	NA	NA
29378059_79688	29378059	T	Thupl.29378059s0001	Thupl.29378059s0001.1.v3.1	Transcript	3_prime_UTR_variant	7293	NA	NA	NA	NA	NA
29378064_4133251	29378064	C	Thupl.29378064s0023	Thupl.29378064s0023.1.v3.1	Transcript	3_prime_UTR_variant	6740	NA	NA	NA	NA	NA
29378064_4133322	29378064	C	Thupl.29378064s0023	Thupl.29378064s0023.1.v3.1	Transcript	3_prime_UTR_variant	6669	NA	NA	NA	NA	NA
29378064_4506598	29378064	G	Thupl.29378064s0024	Thupl.29378064s0024.1.v3.1	Transcript	3_prime_UTR_variant	1237	NA	NA	NA	NA	NA
29378070_3838382	29378070	C	Thupl.29378070s0010	Thupl.29378070s0010.1.v3.1	Transcript	3_prime_UTR_variant	1106	NA	NA	NA	NA	NA
29378070_3838408	29378070	C	Thupl.29378070s0010	Thupl.29378070s0010.1.v3.1	Transcript	3_prime_UTR_variant	1132	NA	NA	NA	NA	NA
29378070_4573428	29378070	T	Thupl.29378070s0011	Thupl.29378070s0011.1.v3.1	Transcript	3_prime_UTR_variant	4514	NA	NA	NA	NA	NA
29378070_4573616	29378070	A	Thupl.29378070s0011	Thupl.29378070s0011.1.v3.1	Transcript	3_prime_UTR_variant	4702	NA	NA	NA	NA	NA
29378070_5436819	29378070	T	Thupl.29378070s0015	Thupl.29378070s0015.1.v3.1	Transcript	3_prime_UTR_variant	1462	NA	NA	NA	NA	NA
29378074_1793278	29378074	T	Thupl.29378074s0007	Thupl.29378074s0007.3.v3.1	Transcript	3_prime_UTR_variant	3739	NA	NA	NA	NA	NA
29378074_2925862	29378074	C	Thupl.29378074s0011	Thupl.29378074s0011.1.v3.1	Transcript	3_prime_UTR_variant	2077	NA	NA	NA	NA	NA
29378075_1755657	29378075	G	Thupl.29378075s0005	Thupl.29378075s0005.2.v3.1	Transcript	3_prime_UTR_variant	4349	NA	NA	NA	NA	NA
29378078_1959712	29378078	A	Thupl.29378078s0005	Thupl.29378078s0005.1.v3.1	Transcript	3_prime_UTR_variant	1142	NA	NA	NA	NA	NA
29378078_1959808	29378078	T	Thupl.29378078s0005	Thupl.29378078s0005.1.v3.1	Transcript	3_prime_UTR_variant	1238	NA	NA	NA	NA	NA
29378078_1959859	29378078	A	Thupl.29378078s0005	Thupl.29378078s0005.1.v3.1	Transcript	3_prime_UTR_variant	1289	NA	NA	NA	NA	NA
29378078_4658329	29378078	T	Thupl.29378078s0012	Thupl.29378078s0012.2.v3.1	Transcript	3_prime_UTR_variant	1142	NA	NA	NA	NA	NA
29378078_7801424	29378078	A	Thupl.29378078s0021	Thupl.29378078s0021.1.v3.1	Transcript	3_prime_UTR_variant	1827	NA	NA	NA	NA	NA
29378093_453285	29378093	T	Thupl.29378093s0001	Thupl.29378093s0001.2.v3.1	Transcript	3_prime_UTR_variant	2568	NA	NA	NA	NA	NA
29378093_490378	29378093	C	Thupl.29378093s0001	Thupl.29378093s0001.1.v3.1	Transcript	3_prime_UTR_variant	3040	NA	NA	NA	NA	NA
29378093_490728	29378093	G	Thupl.29378093s0001	Thupl.29378093s0001.1.v3.1	Transcript	3_prime_UTR_variant	3390	NA	NA	NA	NA	NA
29378097_224222	29378097	C	Thupl.29378097s0002	Thupl.29378097s0002.1.v3.1	Transcript	3_prime_UTR_variant	5593	NA	NA	NA	NA	NA
29378097_224240	29378097	T	Thupl.29378097s0002	Thupl.29378097s0002.1.v3.1	Transcript	3_prime_UTR_variant	5611	NA	NA	NA	NA	NA
29378097_224385	29378097	G	Thupl.29378097s0002	Thupl.29378097s0002.1.v3.1	Transcript	3_prime_UTR_variant	5756	NA	NA	NA	NA	NA
29378106_97425	29378106	C	Thupl.29378106s0001	Thupl.29378106s0001.1.v3.1	Transcript	3_prime_UTR_variant	2279	NA	NA	NA	NA	NA
29378106_601078	29378106	C	Thupl.29378106s0003	Thupl.29378106s0003.1.v3.1	Transcript	3_prime_UTR_variant	1425	NA	NA	NA	NA	NA
29378106_601118	29378106	A	Thupl.29378106s0003	Thupl.29378106s0003.1.v3.1	Transcript	3_prime_UTR_variant	1465	NA	NA	NA	NA	NA
29378112_539583	29378112	G	Thupl.29378112s0003	Thupl.29378112s0003.1.v3.1	Transcript	3_prime_UTR_variant	3095	NA	NA	NA	NA	NA
29378112_539584	29378112	C	Thupl.29378112s0003	Thupl.29378112s0003.1.v3.1	Transcript	3_prime_UTR_variant	3094	NA	NA	NA	NA	NA
29378112_614273	29378112	G	Thupl.29378112s0004	Thupl.29378112s0004.1.v3.1	Transcript	3_prime_UTR_variant	2577	NA	NA	NA	NA	NA
29378112_614305	29378112	G	Thupl.29378112s0004	Thupl.29378112s0004.1.v3.1	Transcript	3_prime_UTR_variant	2545	NA	NA	NA	NA	NA
29378112_614337	29378112	G	Thupl.29378112s0004	Thupl.29378112s0004.1.v3.1	Transcript	3_prime_UTR_variant	2513	NA	NA	NA	NA	NA
29378115_1263472	29378115	G	Thupl.29378115s0003	Thupl.29378115s0003.1.v3.1	Transcript	3_prime_UTR_variant	4414	NA	NA	NA	NA	NA
29378116_711769	29378116	T	Thupl.29378116s0002	Thupl.29378116s0002.1.v3.1	Transcript	3_prime_UTR_variant	810	NA	NA	NA	NA	NA
29378116_4550367	29378116	C	Thupl.29378116s0024	Thupl.29378116s0024.1.v3.1	Transcript	3_prime_UTR_variant	489	NA	NA	NA	NA	NA
29378118_2682071	29378118	C	Thupl.29378118s0006	Thupl.29378118s0006.1.v3.1	Transcript	3_prime_UTR_variant	2412	NA	NA	NA	NA	NA
29378118_2682082	29378118	C	Thupl.29378118s0006	Thupl.29378118s0006.1.v3.1	Transcript	3_prime_UTR_variant	2401	NA	NA	NA	NA	NA
29378119_1265878	29378119	A	Thupl.29378119s0009	Thupl.29378119s0009.1.v3.1	Transcript	3_prime_UTR_variant	683	NA	NA	NA	NA	NA
29378119_1567767	29378119	A	Thupl.29378119s0010	Thupl.29378119s0010.1.v3.1	Transcript	3_prime_UTR_variant	2469	NA	NA	NA	NA	NA
29378119_1567775	29378119	T	Thupl.29378119s0010	Thupl.29378119s0010.1.v3.1	Transcript	3_prime_UTR_variant	2477	NA	NA	NA	NA	NA
29378119_1567840	29378119	C	Thupl.29378119s0010	Thupl.29378119s0010.1.v3.1	Transcript	3_prime_UTR_variant	2542	NA	NA	NA	NA	NA
29378131_1882711	29378131	A	Thupl.29378131s0005	Thupl.29378131s0005.1.v3.1	Transcript	3_prime_UTR_variant	824	NA	NA	NA	NA	NA
29378131_3279241	29378131	G	Thupl.29378131s0015	Thupl.29378131s0015.1.v3.1	Transcript	3_prime_UTR_variant	2199	NA	NA	NA	NA	NA
29378131_4215744	29378131	C	Thupl.29378131s0021	Thupl.29378131s0021.1.v3.1	Transcript	3_prime_UTR_variant	889	NA	NA	NA	NA	NA
29378135_1270864	29378135	A	Thupl.29378135s0012	Thupl.29378135s0012.1.v3.1	Transcript	3_prime_UTR_variant	7154	NA	NA	NA	NA	NA
29378135_1270892	29378135	T	Thupl.29378135s0012	Thupl.29378135s0012.1.v3.1	Transcript	3_prime_UTR_variant	7126	NA	NA	NA	NA	NA
29378137_1925240	29378137	T	Thupl.29378137s0014	Thupl.29378137s0014.1.v3.1	Transcript	3_prime_UTR_variant	1107	NA	NA	NA	NA	NA
29378137_1925260	29378137	C	Thupl.29378137s0014	Thupl.29378137s0014.1.v3.1	Transcript	3_prime_UTR_variant	1127	NA	NA	NA	NA	NA
29378137_1925356	29378137	G	Thupl.29378137s0014	Thupl.29378137s0014.1.v3.1	Transcript	3_prime_UTR_variant	1223	NA	NA	NA	NA	NA
29378161_1751322	29378161	C	Thupl.29378161s0017	Thupl.29378161s0017.1.v3.1	Transcript	3_prime_UTR_variant	1452	NA	NA	NA	NA	NA
29378161_1751405	29378161	C	Thupl.29378161s0017	Thupl.29378161s0017.1.v3.1	Transcript	3_prime_UTR_variant	1369	NA	NA	NA	NA	NA
29378161_1751410	29378161	A	Thupl.29378161s0017	Thupl.29378161s0017.1.v3.1	Transcript	3_prime_UTR_variant	1364	NA	NA	NA	NA	NA
29378161_2994659	29378161	G	Thupl.29378161s0020	Thupl.29378161s0020.1.v3.1	Transcript	3_prime_UTR_variant	2949	NA	NA	NA	NA	NA
29378161_2994709	29378161	G	Thupl.29378161s0020	Thupl.29378161s0020.1.v3.1	Transcript	3_prime_UTR_variant	2999	NA	NA	NA	NA	NA
29378161_2994718	29378161	A	Thupl.29378161s0020	Thupl.29378161s0020.1.v3.1	Transcript	3_prime_UTR_variant	3008	NA	NA	NA	NA	NA
29378162_1645629	29378162	A	Thupl.29378162s0006	Thupl.29378162s0006.1.v3.1	Transcript	3_prime_UTR_variant	1023	NA	NA	NA	NA	NA
29378162_1645663	29378162	G	Thupl.29378162s0006	Thupl.29378162s0006.1.v3.1	Transcript	3_prime_UTR_variant	989	NA	NA	NA	NA	NA
29378162_4477875	29378162	G	Thupl.29378162s0012	Thupl.29378162s0012.1.v3.1	Transcript	3_prime_UTR_variant	2043	NA	NA	NA	NA	NA
29378162_4477917	29378162	A	Thupl.29378162s0012	Thupl.29378162s0012.1.v3.1	Transcript	3_prime_UTR_variant	2085	NA	NA	NA	NA	NA
29378162_5892885	29378162	C	Thupl.29378162s0014	Thupl.29378162s0014.1.v3.1	Transcript	3_prime_UTR_variant	6906	NA	NA	NA	NA	NA
29378162_5892911	29378162	C	Thupl.29378162s0014	Thupl.29378162s0014.1.v3.1	Transcript	3_prime_UTR_variant	6932	NA	NA	NA	NA	NA
29378164_19723	29378164	G	Thupl.29378164s0001	Thupl.29378164s0001.1.v3.1	Transcript	3_prime_UTR_variant	2497	NA	NA	NA	NA	NA
29378169_194057	29378169	G	Thupl.29378169s0003	Thupl.29378169s0003.1.v3.1	Transcript	3_prime_UTR_variant	3941	NA	NA	NA	NA	NA
29378169_2150864	29378169	C	Thupl.29378169s0018	Thupl.29378169s0018.1.v3.1	Transcript	3_prime_UTR_variant	2132	NA	NA	NA	NA	NA
29378169_2573515	29378169	T	Thupl.29378169s0021	Thupl.29378169s0021.1.v3.1	Transcript	3_prime_UTR_variant	1579	NA	NA	NA	NA	NA
29378169_2573516	29378169	C	Thupl.29378169s0021	Thupl.29378169s0021.1.v3.1	Transcript	3_prime_UTR_variant	1578	NA	NA	NA	NA	NA
29378169_2573539	29378169	C	Thupl.29378169s0021	Thupl.29378169s0021.1.v3.1	Transcript	3_prime_UTR_variant	1555	NA	NA	NA	NA	NA
29378169_2573562	29378169	A	Thupl.29378169s0021	Thupl.29378169s0021.1.v3.1	Transcript	3_prime_UTR_variant	1532	NA	NA	NA	NA	NA
29378169_2573566	29378169	G	Thupl.29378169s0021	Thupl.29378169s0021.1.v3.1	Transcript	3_prime_UTR_variant	1528	NA	NA	NA	NA	NA
29378169_2573588	29378169	C	Thupl.29378169s0021	Thupl.29378169s0021.1.v3.1	Transcript	3_prime_UTR_variant	1506	NA	NA	NA	NA	NA
29378169_2573605	29378169	C	Thupl.29378169s0021	Thupl.29378169s0021.1.v3.1	Transcript	3_prime_UTR_variant	1489	NA	NA	NA	NA	NA
29378169_2573652	29378169	G	Thupl.29378169s0021	Thupl.29378169s0021.1.v3.1	Transcript	3_prime_UTR_variant	1442	NA	NA	NA	NA	NA
29378169_2573658	29378169	T	Thupl.29378169s0021	Thupl.29378169s0021.1.v3.1	Transcript	3_prime_UTR_variant	1436	NA	NA	NA	NA	NA
29378169_2573667	29378169	T	Thupl.29378169s0021	Thupl.29378169s0021.1.v3.1	Transcript	3_prime_UTR_variant	1427	NA	NA	NA	NA	NA
29378169_2573882	29378169	G	Thupl.29378169s0021	Thupl.29378169s0021.1.v3.1	Transcript	3_prime_UTR_variant	1212	NA	NA	NA	NA	NA
29378171_802037	29378171	T	Thupl.29378171s0006	Thupl.29378171s0006.1.v3.1	Transcript	3_prime_UTR_variant	2963	NA	NA	NA	NA	NA
29378173_1419110	29378173	G	Thupl.29378173s0003	Thupl.29378173s0003.1.v3.1	Transcript	3_prime_UTR_variant	2113	NA	NA	NA	NA	NA
29378174_617663	29378174	G	Thupl.29378174s0004	Thupl.29378174s0004.1.v3.1	Transcript	3_prime_UTR_variant	2134	NA	NA	NA	NA	NA
29378174_707660	29378174	T	Thupl.29378174s0006	Thupl.29378174s0006.1.v3.1	Transcript	3_prime_UTR_variant	1645	NA	NA	NA	NA	NA
29378174_975487	29378174	A	Thupl.29378174s0007	Thupl.29378174s0007.1.v3.1	Transcript	3_prime_UTR_variant	1968	NA	NA	NA	NA	NA
29378174_975569	29378174	A	Thupl.29378174s0007	Thupl.29378174s0007.1.v3.1	Transcript	3_prime_UTR_variant	2050	NA	NA	NA	NA	NA
29378174_1413944	29378174	G	Thupl.29378174s0009	Thupl.29378174s0009.1.v3.1	Transcript	3_prime_UTR_variant	1639	NA	NA	NA	NA	NA
29378174_1934915	29378174	A	Thupl.29378174s0011	Thupl.29378174s0011.1.v3.1	Transcript	3_prime_UTR_variant	1265	NA	NA	NA	NA	NA
29378174_1934961	29378174	G	Thupl.29378174s0011	Thupl.29378174s0011.1.v3.1	Transcript	3_prime_UTR_variant	1311	NA	NA	NA	NA	NA
29378174_2234625	29378174	A	Thupl.29378174s0012	Thupl.29378174s0012.1.v3.1	Transcript	3_prime_UTR_variant	985	NA	NA	NA	NA	NA
29378174_2700958	29378174	A	Thupl.29378174s0013	Thupl.29378174s0013.1.v3.1	Transcript	3_prime_UTR_variant	2304	NA	NA	NA	NA	NA
29378174_2701025	29378174	A	Thupl.29378174s0013	Thupl.29378174s0013.1.v3.1	Transcript	3_prime_UTR_variant	2237	NA	NA	NA	NA	NA
29378174_2701056	29378174	C	Thupl.29378174s0013	Thupl.29378174s0013.1.v3.1	Transcript	3_prime_UTR_variant	2206	NA	NA	NA	NA	NA
29378176_1381309	29378176	T	Thupl.29378176s0001	Thupl.29378176s0001.1.v3.1	Transcript	3_prime_UTR_variant	2268	NA	NA	NA	NA	NA
29378176_1381320	29378176	C	Thupl.29378176s0001	Thupl.29378176s0001.1.v3.1	Transcript	3_prime_UTR_variant	2279	NA	NA	NA	NA	NA
29378176_1381394	29378176	C	Thupl.29378176s0001	Thupl.29378176s0001.1.v3.1	Transcript	3_prime_UTR_variant	2353	NA	NA	NA	NA	NA
29378176_1381434	29378176	C	Thupl.29378176s0001	Thupl.29378176s0001.1.v3.1	Transcript	3_prime_UTR_variant	2393	NA	NA	NA	NA	NA
29378181_129981	29378181	C	Thupl.29378181s0001	Thupl.29378181s0001.1.v3.1	Transcript	3_prime_UTR_variant	810	NA	NA	NA	NA	NA
29378181_413024	29378181	G	Thupl.29378181s0002	Thupl.29378181s0002.1.v3.1	Transcript	3_prime_UTR_variant	1308	NA	NA	NA	NA	NA
29378184_1163626	29378184	G	Thupl.29378184s0014	Thupl.29378184s0014.1.v3.1	Transcript	3_prime_UTR_variant	574	NA	NA	NA	NA	NA
29378187_390852	29378187	A	Thupl.29378187s0005	Thupl.29378187s0005.1.v3.1	Transcript	3_prime_UTR_variant	1057	NA	NA	NA	NA	NA
29378187_390908	29378187	G	Thupl.29378187s0005	Thupl.29378187s0005.1.v3.1	Transcript	3_prime_UTR_variant	1113	NA	NA	NA	NA	NA
29378199_3773779	29378199	T	Thupl.29378199s0017	Thupl.29378199s0017.1.v3.1	Transcript	3_prime_UTR_variant	3362	NA	NA	NA	NA	NA
29378199_4298649	29378199	G	Thupl.29378199s0018	Thupl.29378199s0018.1.v3.1	Transcript	3_prime_UTR_variant	2499	NA	NA	NA	NA	NA
29378199_6425604	29378199	T	Thupl.29378199s0027	Thupl.29378199s0027.1.v3.1	Transcript	3_prime_UTR_variant	1733	NA	NA	NA	NA	NA
29378199_6425653	29378199	A	Thupl.29378199s0027	Thupl.29378199s0027.1.v3.1	Transcript	3_prime_UTR_variant	1782	NA	NA	NA	NA	NA
29378199_6425957	29378199	C	Thupl.29378199s0027	Thupl.29378199s0027.1.v3.1	Transcript	3_prime_UTR_variant	2086	NA	NA	NA	NA	NA
29378201_2389835	29378201	C	Thupl.29378201s0006	Thupl.29378201s0006.1.v3.1	Transcript	3_prime_UTR_variant	2422	NA	NA	NA	NA	NA
29378203_106203	29378203	C	Thupl.29378203s0002	Thupl.29378203s0002.1.v3.1	Transcript	3_prime_UTR_variant	2675	NA	NA	NA	NA	NA
29378203_106230	29378203	G	Thupl.29378203s0002	Thupl.29378203s0002.1.v3.1	Transcript	3_prime_UTR_variant	2702	NA	NA	NA	NA	NA
29378206_123238	29378206	C	Thupl.29378206s0001	Thupl.29378206s0001.1.v3.1	Transcript	3_prime_UTR_variant	5496	NA	NA	NA	NA	NA
29378206_123332	29378206	G	Thupl.29378206s0001	Thupl.29378206s0001.1.v3.1	Transcript	3_prime_UTR_variant	5402	NA	NA	NA	NA	NA
29378206_1076360	29378206	T	Thupl.29378206s0005	Thupl.29378206s0005.1.v3.1	Transcript	3_prime_UTR_variant	3029	NA	NA	NA	NA	NA
29378207_44110	29378207	A	Thupl.29378207s0001	Thupl.29378207s0001.1.v3.1	Transcript	3_prime_UTR_variant	891	NA	NA	NA	NA	NA
29378210_1451363	29378210	T	Thupl.29378210s0007	Thupl.29378210s0007.1.v3.1	Transcript	3_prime_UTR_variant	716	NA	NA	NA	NA	NA
29378212_6771647	29378212	T	Thupl.29378212s0025	Thupl.29378212s0025.1.v3.1	Transcript	3_prime_UTR_variant	4586	NA	NA	NA	NA	NA
29378212_7156705	29378212	A	Thupl.29378212s0029	Thupl.29378212s0029.1.v3.1	Transcript	3_prime_UTR_variant	2835	NA	NA	NA	NA	NA
29378212_7156792	29378212	C	Thupl.29378212s0029	Thupl.29378212s0029.1.v3.1	Transcript	3_prime_UTR_variant	2748	NA	NA	NA	NA	NA
29378213_107184	29378213	C	Thupl.29378213s0001	Thupl.29378213s0001.1.v3.1	Transcript	3_prime_UTR_variant	2684	NA	NA	NA	NA	NA
29378213_448209	29378213	T	Thupl.29378213s0003	Thupl.29378213s0003.1.v3.1	Transcript	3_prime_UTR_variant	2230	NA	NA	NA	NA	NA
29378216_640435	29378216	G	Thupl.29378216s0002	Thupl.29378216s0002.1.v3.1	Transcript	3_prime_UTR_variant	1678	NA	NA	NA	NA	NA
29378216_640504	29378216	G	Thupl.29378216s0002	Thupl.29378216s0002.1.v3.1	Transcript	3_prime_UTR_variant	1609	NA	NA	NA	NA	NA
29378220_781866	29378220	A	Thupl.29378220s0004	Thupl.29378220s0004.1.v3.1	Transcript	3_prime_UTR_variant	1529	NA	NA	NA	NA	NA
29378220_781885	29378220	C	Thupl.29378220s0004	Thupl.29378220s0004.1.v3.1	Transcript	3_prime_UTR_variant	1510	NA	NA	NA	NA	NA
29378220_781915	29378220	T	Thupl.29378220s0004	Thupl.29378220s0004.1.v3.1	Transcript	3_prime_UTR_variant	1480	NA	NA	NA	NA	NA
29378220_781927	29378220	A	Thupl.29378220s0004	Thupl.29378220s0004.1.v3.1	Transcript	3_prime_UTR_variant	1468	NA	NA	NA	NA	NA
29378220_782260	29378220	G	Thupl.29378220s0004	Thupl.29378220s0004.1.v3.1	Transcript	3_prime_UTR_variant	1135	NA	NA	NA	NA	NA
29378220_782268	29378220	T	Thupl.29378220s0004	Thupl.29378220s0004.1.v3.1	Transcript	3_prime_UTR_variant	1127	NA	NA	NA	NA	NA
29378220_782306	29378220	T	Thupl.29378220s0004	Thupl.29378220s0004.1.v3.1	Transcript	3_prime_UTR_variant	1089	NA	NA	NA	NA	NA
29378222_709414	29378222	G	Thupl.29378222s0004	Thupl.29378222s0004.1.v3.1	Transcript	3_prime_UTR_variant	2618	NA	NA	NA	NA	NA
29378224_3676746	29378224	C	Thupl.29378224s0018	Thupl.29378224s0018.1.v3.1	Transcript	3_prime_UTR_variant	3738	NA	NA	NA	NA	NA
29378224_3676842	29378224	A	Thupl.29378224s0018	Thupl.29378224s0018.1.v3.1	Transcript	3_prime_UTR_variant	3834	NA	NA	NA	NA	NA
29378224_3676881	29378224	T	Thupl.29378224s0018	Thupl.29378224s0018.1.v3.1	Transcript	3_prime_UTR_variant	3873	NA	NA	NA	NA	NA
29378226_4494638	29378226	G	Thupl.29378226s0019	Thupl.29378226s0019.1.v3.1	Transcript	3_prime_UTR_variant	4273	NA	NA	NA	NA	NA
29378231_751421	29378231	C	Thupl.29378231s0002	Thupl.29378231s0002.2.v3.1	Transcript	3_prime_UTR_variant	550	NA	NA	NA	NA	NA
29378241_806589	29378241	G	Thupl.29378241s0005	Thupl.29378241s0005.1.v3.1	Transcript	3_prime_UTR_variant	3668	NA	NA	NA	NA	NA
29378242_2179607	29378242	C	Thupl.29378242s0012	Thupl.29378242s0012.1.v3.1	Transcript	3_prime_UTR_variant	3330	NA	NA	NA	NA	NA
29378246_1397487	29378246	A	Thupl.29378246s0008	Thupl.29378246s0008.1.v3.1	Transcript	3_prime_UTR_variant	1948	NA	NA	NA	NA	NA
29378258_3844430	29378258	A	Thupl.29378258s0008	Thupl.29378258s0008.1.v3.1	Transcript	3_prime_UTR_variant	1556	NA	NA	NA	NA	NA
29378258_3844442	29378258	G	Thupl.29378258s0008	Thupl.29378258s0008.1.v3.1	Transcript	3_prime_UTR_variant	1568	NA	NA	NA	NA	NA
29378269_460813	29378269	G	Thupl.29378269s0005	Thupl.29378269s0005.1.v3.1	Transcript	3_prime_UTR_variant	912	NA	NA	NA	NA	NA
29378269_460841	29378269	A	Thupl.29378269s0005	Thupl.29378269s0005.1.v3.1	Transcript	3_prime_UTR_variant	940	NA	NA	NA	NA	NA
29378269_460853	29378269	T	Thupl.29378269s0005	Thupl.29378269s0005.1.v3.1	Transcript	3_prime_UTR_variant	952	NA	NA	NA	NA	NA
29378271_1373526	29378271	G	Thupl.29378271s0008	Thupl.29378271s0008.1.v3.1	Transcript	3_prime_UTR_variant	4894	NA	NA	NA	NA	NA
29378271_1875953	29378271	T	Thupl.29378271s0010	Thupl.29378271s0010.1.v3.1	Transcript	3_prime_UTR_variant	2801	NA	NA	NA	NA	NA
29378271_1876005	29378271	T	Thupl.29378271s0010	Thupl.29378271s0010.1.v3.1	Transcript	3_prime_UTR_variant	2749	NA	NA	NA	NA	NA
29378271_2620459	29378271	G	Thupl.29378271s0014	Thupl.29378271s0014.1.v3.1	Transcript	3_prime_UTR_variant	1530	NA	NA	NA	NA	NA
29378271_3926497	29378271	T	Thupl.29378271s0027	Thupl.29378271s0027.1.v3.1	Transcript	3_prime_UTR_variant	1892	NA	NA	NA	NA	NA
29378279_585265	29378279	G	Thupl.29378279s0004	Thupl.29378279s0004.1.v3.1	Transcript	3_prime_UTR_variant	1545	NA	NA	NA	NA	NA
29378279_914434	29378279	G	Thupl.29378279s0008	Thupl.29378279s0008.1.v3.1	Transcript	3_prime_UTR_variant	1563	NA	NA	NA	NA	NA
29378279_914503	29378279	C	Thupl.29378279s0008	Thupl.29378279s0008.1.v3.1	Transcript	3_prime_UTR_variant	1632	NA	NA	NA	NA	NA
29378279_914525	29378279	T	Thupl.29378279s0008	Thupl.29378279s0008.1.v3.1	Transcript	3_prime_UTR_variant	1654	NA	NA	NA	NA	NA
29378279_1646870	29378279	G	Thupl.29378279s0012	Thupl.29378279s0012.1.v3.1	Transcript	3_prime_UTR_variant	1678	NA	NA	NA	NA	NA
29378279_6497030	29378279	G	Thupl.29378279s0023	Thupl.29378279s0023.1.v3.1	Transcript	3_prime_UTR_variant	1497	NA	NA	NA	NA	NA
29378279_7472671	29378279	C	Thupl.29378279s0025	Thupl.29378279s0025.1.v3.1	Transcript	3_prime_UTR_variant	2916	NA	NA	NA	NA	NA
29378279_7472882	29378279	C	Thupl.29378279s0025	Thupl.29378279s0025.1.v3.1	Transcript	3_prime_UTR_variant	2705	NA	NA	NA	NA	NA
29378279_7908667	29378279	G	Thupl.29378279s0026	Thupl.29378279s0026.4.v3.1	Transcript	3_prime_UTR_variant	1488	NA	NA	NA	NA	NA
29378279_9837691	29378279	G	Thupl.29378279s0032	Thupl.29378279s0032.1.v3.1	Transcript	3_prime_UTR_variant	2021	NA	NA	NA	NA	NA
29378279_9837728	29378279	T	Thupl.29378279s0032	Thupl.29378279s0032.1.v3.1	Transcript	3_prime_UTR_variant	2058	NA	NA	NA	NA	NA
29378279_9837742	29378279	A	Thupl.29378279s0032	Thupl.29378279s0032.1.v3.1	Transcript	3_prime_UTR_variant	2072	NA	NA	NA	NA	NA
29378290_91141	29378290	T	Thupl.29378290s0001	Thupl.29378290s0001.1.v3.1	Transcript	3_prime_UTR_variant	1288	NA	NA	NA	NA	NA
29378294_732933	29378294	T	Thupl.29378294s0003	Thupl.29378294s0003.1.v3.1	Transcript	3_prime_UTR_variant	1958	NA	NA	NA	NA	NA
29378294_733025	29378294	A	Thupl.29378294s0003	Thupl.29378294s0003.1.v3.1	Transcript	3_prime_UTR_variant	2050	NA	NA	NA	NA	NA
29378297_430859	29378297	C	Thupl.29378297s0005	Thupl.29378297s0005.1.v3.1	Transcript	3_prime_UTR_variant	2809	NA	NA	NA	NA	NA
29378305_1002059	29378305	C	Thupl.29378305s0006	Thupl.29378305s0006.1.v3.1	Transcript	3_prime_UTR_variant	866	NA	NA	NA	NA	NA
29378305_1002115	29378305	C	Thupl.29378305s0006	Thupl.29378305s0006.1.v3.1	Transcript	3_prime_UTR_variant	922	NA	NA	NA	NA	NA
29378313_952757	29378313	G	Thupl.29378313s0006	Thupl.29378313s0006.1.v3.1	Transcript	3_prime_UTR_variant	2421	NA	NA	NA	NA	NA
29378314_2152895	29378314	A	Thupl.29378314s0009	Thupl.29378314s0009.1.v3.1	Transcript	3_prime_UTR_variant	390	NA	NA	NA	NA	NA
29378317_900239	29378317	A	Thupl.29378317s0003	Thupl.29378317s0003.1.v3.1	Transcript	3_prime_UTR_variant	4108	NA	NA	NA	NA	NA
29378320_240944	29378320	C	Thupl.29378320s0001	Thupl.29378320s0001.1.v3.1	Transcript	3_prime_UTR_variant	1047	NA	NA	NA	NA	NA
29378320_241015	29378320	A	Thupl.29378320s0001	Thupl.29378320s0001.1.v3.1	Transcript	3_prime_UTR_variant	1118	NA	NA	NA	NA	NA
29378320_1549959	29378320	A	Thupl.29378320s0005	Thupl.29378320s0005.1.v3.1	Transcript	3_prime_UTR_variant	2620	NA	NA	NA	NA	NA
29378331_115854	29378331	C	Thupl.29378331s0004	Thupl.29378331s0004.1.v3.1	Transcript	3_prime_UTR_variant	1670	NA	NA	NA	NA	NA
29378336_263502	29378336	G	Thupl.29378336s0001	Thupl.29378336s0001.1.v3.1	Transcript	3_prime_UTR_variant	3487	NA	NA	NA	NA	NA
29378343_209347	29378343	G	Thupl.29378343s0001	Thupl.29378343s0001.1.v3.1	Transcript	3_prime_UTR_variant	1638	NA	NA	NA	NA	NA
29378352_396294	29378352	A	Thupl.29378352s0001	Thupl.29378352s0001.1.v3.1	Transcript	3_prime_UTR_variant	1816	NA	NA	NA	NA	NA
29378352_396346	29378352	T	Thupl.29378352s0001	Thupl.29378352s0001.1.v3.1	Transcript	3_prime_UTR_variant	1868	NA	NA	NA	NA	NA
29378352_396545	29378352	C	Thupl.29378352s0001	Thupl.29378352s0001.1.v3.1	Transcript	3_prime_UTR_variant	2067	NA	NA	NA	NA	NA
29378352_396616	29378352	G	Thupl.29378352s0001	Thupl.29378352s0001.1.v3.1	Transcript	3_prime_UTR_variant	2138	NA	NA	NA	NA	NA
29378352_746594	29378352	A	Thupl.29378352s0005	Thupl.29378352s0005.1.v3.1	Transcript	3_prime_UTR_variant	2305	NA	NA	NA	NA	NA
29378352_1227190	29378352	C	Thupl.29378352s0008	Thupl.29378352s0008.1.v3.1	Transcript	3_prime_UTR_variant	3037	NA	NA	NA	NA	NA
29378353_76978	29378353	A	Thupl.29378353s0001	Thupl.29378353s0001.1.v3.1	Transcript	3_prime_UTR_variant	2314	NA	NA	NA	NA	NA
29378358_1646704	29378358	A	Thupl.29378358s0007	Thupl.29378358s0007.1.v3.1	Transcript	3_prime_UTR_variant	2121	NA	NA	NA	NA	NA
29378365_392940	29378365	T	Thupl.29378365s0003	Thupl.29378365s0003.1.v3.1	Transcript	3_prime_UTR_variant	1096	NA	NA	NA	NA	NA
29378367_5686869	29378367	G	Thupl.29378367s0016	Thupl.29378367s0016.1.v3.1	Transcript	3_prime_UTR_variant	1885	NA	NA	NA	NA	NA
29378368_127607	29378368	G	Thupl.29378368s0002	Thupl.29378368s0002.1.v3.1	Transcript	3_prime_UTR_variant	1233	NA	NA	NA	NA	NA
29378370_3257259	29378370	G	Thupl.29378370s0014	Thupl.29378370s0014.1.v3.1	Transcript	3_prime_UTR_variant	1546	NA	NA	NA	NA	NA
29378370_3257349	29378370	C	Thupl.29378370s0014	Thupl.29378370s0014.1.v3.1	Transcript	3_prime_UTR_variant	1636	NA	NA	NA	NA	NA
29378370_3257395	29378370	C	Thupl.29378370s0014	Thupl.29378370s0014.1.v3.1	Transcript	3_prime_UTR_variant	1682	NA	NA	NA	NA	NA
29378370_3257523	29378370	G	Thupl.29378370s0014	Thupl.29378370s0014.1.v3.1	Transcript	3_prime_UTR_variant	1810	NA	NA	NA	NA	NA
29378377_3023084	29378377	C	Thupl.29378377s0012	Thupl.29378377s0012.1.v3.1	Transcript	3_prime_UTR_variant	2541	NA	NA	NA	NA	NA
29378377_4102721	29378377	C	Thupl.29378377s0015	Thupl.29378377s0015.1.v3.1	Transcript	3_prime_UTR_variant	2516	NA	NA	NA	NA	NA
29378377_4348080	29378377	C	Thupl.29378377s0017	Thupl.29378377s0017.1.v3.1	Transcript	3_prime_UTR_variant	584	NA	NA	NA	NA	NA
29378377_4889237	29378377	C	Thupl.29378377s0019	Thupl.29378377s0019.1.v3.1	Transcript	3_prime_UTR_variant	5560	NA	NA	NA	NA	NA
29378377_4889363	29378377	C	Thupl.29378377s0019	Thupl.29378377s0019.1.v3.1	Transcript	3_prime_UTR_variant	5686	NA	NA	NA	NA	NA
29378377_4889396	29378377	A	Thupl.29378377s0019	Thupl.29378377s0019.1.v3.1	Transcript	3_prime_UTR_variant	5719	NA	NA	NA	NA	NA
29378393_1214887	29378393	G	Thupl.29378393s0002	Thupl.29378393s0002.1.v3.1	Transcript	3_prime_UTR_variant	751	NA	NA	NA	NA	NA
29378393_1778202	29378393	G	Thupl.29378393s0003	Thupl.29378393s0003.1.v3.1	Transcript	3_prime_UTR_variant	2340	NA	NA	NA	NA	NA
29378402_89853	29378402	A	Thupl.29378402s0001	Thupl.29378402s0001.1.v3.1	Transcript	3_prime_UTR_variant	3260	NA	NA	NA	NA	NA
29378403_120353	29378403	G	Thupl.29378403s0003	Thupl.29378403s0003.1.v3.1	Transcript	3_prime_UTR_variant	635	NA	NA	NA	NA	NA
29378403_1334184	29378403	A	Thupl.29378403s0005	Thupl.29378403s0005.1.v3.1	Transcript	3_prime_UTR_variant	1193	NA	NA	NA	NA	NA
29378406_1366274	29378406	C	Thupl.29378406s0006	Thupl.29378406s0006.1.v3.1	Transcript	3_prime_UTR_variant	3413	NA	NA	NA	NA	NA
29378407_1257957	29378407	G	Thupl.29378407s0009	Thupl.29378407s0009.1.v3.1	Transcript	3_prime_UTR_variant	3434	NA	NA	NA	NA	NA
29378407_4548807	29378407	T	Thupl.29378407s0020	Thupl.29378407s0020.1.v3.1	Transcript	3_prime_UTR_variant	3549	NA	NA	NA	NA	NA
29378407_5684174	29378407	A	Thupl.29378407s0025	Thupl.29378407s0025.1.v3.1	Transcript	3_prime_UTR_variant	1160	NA	NA	NA	NA	NA
29378409_168957	29378409	A	Thupl.29378409s0001	Thupl.29378409s0001.1.v3.1	Transcript	3_prime_UTR_variant	2192	NA	NA	NA	NA	NA
29378414_4411331	29378414	T	Thupl.29378414s0018	Thupl.29378414s0018.1.v3.1	Transcript	3_prime_UTR_variant	1147	NA	NA	NA	NA	NA
29378417_1096282	29378417	C	Thupl.29378417s0004	Thupl.29378417s0004.1.v3.1	Transcript	3_prime_UTR_variant	2634	NA	NA	NA	NA	NA
29378420_531466	29378420	T	Thupl.29378420s0003	Thupl.29378420s0003.1.v3.1	Transcript	3_prime_UTR_variant	2040	NA	NA	NA	NA	NA
29378420_531527	29378420	C	Thupl.29378420s0003	Thupl.29378420s0003.1.v3.1	Transcript	3_prime_UTR_variant	2101	NA	NA	NA	NA	NA
29378424_1627432	29378424	C	Thupl.29378424s0010	Thupl.29378424s0010.1.v3.1	Transcript	3_prime_UTR_variant	661	NA	NA	NA	NA	NA
29378425_281511	29378425	G	Thupl.29378425s0004	Thupl.29378425s0004.2.v3.1	Transcript	3_prime_UTR_variant	4266	NA	NA	NA	NA	NA
29378434_1001066	29378434	A	Thupl.29378434s0003	Thupl.29378434s0003.1.v3.1	Transcript	3_prime_UTR_variant	717	NA	NA	NA	NA	NA
29378434_1001085	29378434	G	Thupl.29378434s0003	Thupl.29378434s0003.1.v3.1	Transcript	3_prime_UTR_variant	698	NA	NA	NA	NA	NA
29378434_1001089	29378434	A	Thupl.29378434s0003	Thupl.29378434s0003.1.v3.1	Transcript	3_prime_UTR_variant	694	NA	NA	NA	NA	NA
29378434_1001103	29378434	G	Thupl.29378434s0003	Thupl.29378434s0003.1.v3.1	Transcript	3_prime_UTR_variant	680	NA	NA	NA	NA	NA
29378434_1807706	29378434	G	Thupl.29378434s0008	Thupl.29378434s0008.1.v3.1	Transcript	3_prime_UTR_variant	1937	NA	NA	NA	NA	NA
29378436_1180754	29378436	A	Thupl.29378436s0002	Thupl.29378436s0002.1.v3.1	Transcript	3_prime_UTR_variant	1264	NA	NA	NA	NA	NA
29378436_2085818	29378436	C	Thupl.29378436s0004	Thupl.29378436s0004.1.v3.1	Transcript	3_prime_UTR_variant	1846	NA	NA	NA	NA	NA
29378436_2085955	29378436	A	Thupl.29378436s0004	Thupl.29378436s0004.1.v3.1	Transcript	3_prime_UTR_variant	1983	NA	NA	NA	NA	NA
29378436_2085980	29378436	C	Thupl.29378436s0004	Thupl.29378436s0004.1.v3.1	Transcript	3_prime_UTR_variant	2008	NA	NA	NA	NA	NA
29378436_2085995	29378436	A	Thupl.29378436s0004	Thupl.29378436s0004.1.v3.1	Transcript	3_prime_UTR_variant	2023	NA	NA	NA	NA	NA
29378436_2086047	29378436	C	Thupl.29378436s0004	Thupl.29378436s0004.1.v3.1	Transcript	3_prime_UTR_variant	2075	NA	NA	NA	NA	NA
29378436_2086100	29378436	G	Thupl.29378436s0004	Thupl.29378436s0004.1.v3.1	Transcript	3_prime_UTR_variant	2128	NA	NA	NA	NA	NA
29378436_2086122	29378436	G	Thupl.29378436s0004	Thupl.29378436s0004.1.v3.1	Transcript	3_prime_UTR_variant	2150	NA	NA	NA	NA	NA
29378436_2086133	29378436	A	Thupl.29378436s0004	Thupl.29378436s0004.1.v3.1	Transcript	3_prime_UTR_variant	2161	NA	NA	NA	NA	NA
29378438_1974634	29378438	G	Thupl.29378438s0009	Thupl.29378438s0009.1.v3.1	Transcript	3_prime_UTR_variant	682	NA	NA	NA	NA	NA
29378444_423073	29378444	G	Thupl.29378444s0004	Thupl.29378444s0004.1.v3.1	Transcript	3_prime_UTR_variant	2623	NA	NA	NA	NA	NA
29378445_1399609	29378445	C	Thupl.29378445s0015	Thupl.29378445s0015.1.v3.1	Transcript	3_prime_UTR_variant	1237	NA	NA	NA	NA	NA
29378445_1399672	29378445	A	Thupl.29378445s0015	Thupl.29378445s0015.1.v3.1	Transcript	3_prime_UTR_variant	1300	NA	NA	NA	NA	NA
29378445_1399773	29378445	T	Thupl.29378445s0015	Thupl.29378445s0015.1.v3.1	Transcript	3_prime_UTR_variant	1401	NA	NA	NA	NA	NA
29378451_311457	29378451	A	Thupl.29378451s0007	Thupl.29378451s0007.2.v3.1	Transcript	3_prime_UTR_variant	1864	NA	NA	NA	NA	NA
29378451_477906	29378451	C	Thupl.29378451s0008	Thupl.29378451s0008.1.v3.1	Transcript	3_prime_UTR_variant	1441	NA	NA	NA	NA	NA
29378451_477928	29378451	C	Thupl.29378451s0008	Thupl.29378451s0008.1.v3.1	Transcript	3_prime_UTR_variant	1463	NA	NA	NA	NA	NA
29378451_477929	29378451	C	Thupl.29378451s0008	Thupl.29378451s0008.1.v3.1	Transcript	3_prime_UTR_variant	1464	NA	NA	NA	NA	NA
29378451_609752	29378451	T	Thupl.29378451s0009	Thupl.29378451s0009.1.v3.1	Transcript	3_prime_UTR_variant	2061	NA	NA	NA	NA	NA
29378454_174592	29378454	C	Thupl.29378454s0003	Thupl.29378454s0003.1.v3.1	Transcript	3_prime_UTR_variant	3093	NA	NA	NA	NA	NA
29378456_1545078	29378456	G	Thupl.29378456s0019	Thupl.29378456s0019.1.v3.1	Transcript	3_prime_UTR_variant	1233	NA	NA	NA	NA	NA
29378456_1545090	29378456	G	Thupl.29378456s0019	Thupl.29378456s0019.1.v3.1	Transcript	3_prime_UTR_variant	1245	NA	NA	NA	NA	NA
29378456_1545193	29378456	C	Thupl.29378456s0019	Thupl.29378456s0019.1.v3.1	Transcript	3_prime_UTR_variant	1348	NA	NA	NA	NA	NA
29378458_323848	29378458	T	Thupl.29378458s0003	Thupl.29378458s0003.1.v3.1	Transcript	3_prime_UTR_variant	1315	NA	NA	NA	NA	NA
29378458_324056	29378458	A	Thupl.29378458s0003	Thupl.29378458s0003.1.v3.1	Transcript	3_prime_UTR_variant	1523	NA	NA	NA	NA	NA
29378458_924729	29378458	T	Thupl.29378458s0007	Thupl.29378458s0007.1.v3.1	Transcript	3_prime_UTR_variant	2463	NA	NA	NA	NA	NA
29378460_1248393	29378460	C	Thupl.29378460s0007	Thupl.29378460s0007.1.v3.1	Transcript	3_prime_UTR_variant	743	NA	NA	NA	NA	NA
29378460_1417077	29378460	T	Thupl.29378460s0009	Thupl.29378460s0009.1.v3.1	Transcript	3_prime_UTR_variant	1126	NA	NA	NA	NA	NA
29378461_3042646	29378461	G	Thupl.29378461s0013	Thupl.29378461s0013.1.v3.1	Transcript	3_prime_UTR_variant	1649	NA	NA	NA	NA	NA
29378461_3042762	29378461	A	Thupl.29378461s0013	Thupl.29378461s0013.1.v3.1	Transcript	3_prime_UTR_variant	1765	NA	NA	NA	NA	NA
29378461_3042787	29378461	T	Thupl.29378461s0013	Thupl.29378461s0013.1.v3.1	Transcript	3_prime_UTR_variant	1790	NA	NA	NA	NA	NA
29378481_1326026	29378481	A	Thupl.29378481s0004	Thupl.29378481s0004.1.v3.1	Transcript	3_prime_UTR_variant	2693	NA	NA	NA	NA	NA
29378485_7585038	29378485	G	Thupl.29378485s0020	Thupl.29378485s0020.1.v3.1	Transcript	3_prime_UTR_variant	1819	NA	NA	NA	NA	NA
29378485_7585137	29378485	A	Thupl.29378485s0020	Thupl.29378485s0020.1.v3.1	Transcript	3_prime_UTR_variant	1918	NA	NA	NA	NA	NA
29378488_1038506	29378488	G	Thupl.29378488s0004	Thupl.29378488s0004.1.v3.1	Transcript	3_prime_UTR_variant	1751	NA	NA	NA	NA	NA
29378490_3519594	29378490	G	Thupl.29378490s0009	Thupl.29378490s0009.2.v3.1	Transcript	3_prime_UTR_variant	1481	NA	NA	NA	NA	NA
29378490_3519678	29378490	A	Thupl.29378490s0009	Thupl.29378490s0009.2.v3.1	Transcript	3_prime_UTR_variant	1565	NA	NA	NA	NA	NA
29378491_409287	29378491	T	Thupl.29378491s0007	Thupl.29378491s0007.1.v3.1	Transcript	3_prime_UTR_variant	1522	NA	NA	NA	NA	NA
29378491_1334118	29378491	A	Thupl.29378491s0012	Thupl.29378491s0012.1.v3.1	Transcript	3_prime_UTR_variant	3053	NA	NA	NA	NA	NA
29378491_1334225	29378491	A	Thupl.29378491s0012	Thupl.29378491s0012.1.v3.1	Transcript	3_prime_UTR_variant	3160	NA	NA	NA	NA	NA
29378499_1673502	29378499	A	Thupl.29378499s0020	Thupl.29378499s0020.1.v3.1	Transcript	3_prime_UTR_variant	2478	NA	NA	NA	NA	NA
29378499_1673651	29378499	C	Thupl.29378499s0020	Thupl.29378499s0020.1.v3.1	Transcript	3_prime_UTR_variant	2627	NA	NA	NA	NA	NA
29378501_370682	29378501	C	Thupl.29378501s0003	Thupl.29378501s0003.1.v3.1	Transcript	3_prime_UTR_variant	4345	NA	NA	NA	NA	NA
29378501_370808	29378501	A	Thupl.29378501s0003	Thupl.29378501s0003.1.v3.1	Transcript	3_prime_UTR_variant	4471	NA	NA	NA	NA	NA
29378501_370883	29378501	C	Thupl.29378501s0003	Thupl.29378501s0003.1.v3.1	Transcript	3_prime_UTR_variant	4546	NA	NA	NA	NA	NA
29378501_370943	29378501	C	Thupl.29378501s0003	Thupl.29378501s0003.1.v3.1	Transcript	3_prime_UTR_variant	4606	NA	NA	NA	NA	NA
29378501_698757	29378501	T	Thupl.29378501s0004	Thupl.29378501s0004.1.v3.1	Transcript	3_prime_UTR_variant	1662	NA	NA	NA	NA	NA
29378505_191567	29378505	G	Thupl.29378505s0001	Thupl.29378505s0001.1.v3.1	Transcript	3_prime_UTR_variant	5260	NA	NA	NA	NA	NA
29378509_747735	29378509	C	Thupl.29378509s0002	Thupl.29378509s0002.1.v3.1	Transcript	3_prime_UTR_variant	1862	NA	NA	NA	NA	NA
29378510_2876903	29378510	G	Thupl.29378510s0020	Thupl.29378510s0020.1.v3.1	Transcript	3_prime_UTR_variant	659	NA	NA	NA	NA	NA
29378510_2877433	29378510	T	Thupl.29378510s0020	Thupl.29378510s0020.1.v3.1	Transcript	3_prime_UTR_variant	1189	NA	NA	NA	NA	NA
29378510_2877434	29378510	T	Thupl.29378510s0020	Thupl.29378510s0020.1.v3.1	Transcript	3_prime_UTR_variant	1190	NA	NA	NA	NA	NA
29378511_217566	29378511	C	Thupl.29378511s0003	Thupl.29378511s0003.1.v3.1	Transcript	3_prime_UTR_variant	1994	NA	NA	NA	NA	NA
29378511_217601	29378511	A	Thupl.29378511s0003	Thupl.29378511s0003.1.v3.1	Transcript	3_prime_UTR_variant	1959	NA	NA	NA	NA	NA
29378511_217647	29378511	T	Thupl.29378511s0003	Thupl.29378511s0003.1.v3.1	Transcript	3_prime_UTR_variant	1913	NA	NA	NA	NA	NA
29378511_217649	29378511	C	Thupl.29378511s0003	Thupl.29378511s0003.1.v3.1	Transcript	3_prime_UTR_variant	1911	NA	NA	NA	NA	NA
29378511_217674	29378511	C	Thupl.29378511s0003	Thupl.29378511s0003.1.v3.1	Transcript	3_prime_UTR_variant	1886	NA	NA	NA	NA	NA
29378511_752799	29378511	A	Thupl.29378511s0008	Thupl.29378511s0008.1.v3.1	Transcript	3_prime_UTR_variant	2272	NA	NA	NA	NA	NA
29378511_752906	29378511	A	Thupl.29378511s0008	Thupl.29378511s0008.1.v3.1	Transcript	3_prime_UTR_variant	2165	NA	NA	NA	NA	NA
29378511_752918	29378511	C	Thupl.29378511s0008	Thupl.29378511s0008.1.v3.1	Transcript	3_prime_UTR_variant	2153	NA	NA	NA	NA	NA
29378511_945416	29378511	G	Thupl.29378511s0009	Thupl.29378511s0009.1.v3.1	Transcript	3_prime_UTR_variant	835	NA	NA	NA	NA	NA
29378511_1793742	29378511	A	Thupl.29378511s0017	Thupl.29378511s0017.1.v3.1	Transcript	3_prime_UTR_variant	3301	NA	NA	NA	NA	NA
29378517_434482	29378517	C	Thupl.29378517s0001	Thupl.29378517s0001.1.v3.1	Transcript	3_prime_UTR_variant	792	NA	NA	NA	NA	NA
29378517_724168	29378517	C	Thupl.29378517s0003	Thupl.29378517s0003.1.v3.1	Transcript	3_prime_UTR_variant	627	NA	NA	NA	NA	NA
29378522_2910666	29378522	A	Thupl.29378522s0008	Thupl.29378522s0008.1.v3.1	Transcript	3_prime_UTR_variant	2217	NA	NA	NA	NA	NA
29378524_488659	29378524	G	Thupl.29378524s0004	Thupl.29378524s0004.1.v3.1	Transcript	3_prime_UTR_variant	1110	NA	NA	NA	NA	NA
29378524_488668	29378524	G	Thupl.29378524s0004	Thupl.29378524s0004.1.v3.1	Transcript	3_prime_UTR_variant	1119	NA	NA	NA	NA	NA
29378524_4690215	29378524	T	Thupl.29378524s0024	Thupl.29378524s0024.1.v3.1	Transcript	3_prime_UTR_variant	4860	NA	NA	NA	NA	NA
29378540_686399	29378540	A	Thupl.29378540s0003	Thupl.29378540s0003.1.v3.1	Transcript	3_prime_UTR_variant	1476	NA	NA	NA	NA	NA
29378540_1394035	29378540	T	Thupl.29378540s0008	Thupl.29378540s0008.1.v3.1	Transcript	3_prime_UTR_variant	1777	NA	NA	NA	NA	NA
29378544_188035	29378544	T	Thupl.29378544s0001	Thupl.29378544s0001.1.v3.1	Transcript	3_prime_UTR_variant	1435	NA	NA	NA	NA	NA
29378544_954835	29378544	G	Thupl.29378544s0003	Thupl.29378544s0003.1.v3.1	Transcript	3_prime_UTR_variant	3867	NA	NA	NA	NA	NA
29378545_1258351	29378545	T	Thupl.29378545s0010	Thupl.29378545s0010.1.v3.1	Transcript	3_prime_UTR_variant	2536	NA	NA	NA	NA	NA
29378545_1258466	29378545	A	Thupl.29378545s0010	Thupl.29378545s0010.1.v3.1	Transcript	3_prime_UTR_variant	2421	NA	NA	NA	NA	NA
29378545_1258721	29378545	T	Thupl.29378545s0010	Thupl.29378545s0010.1.v3.1	Transcript	3_prime_UTR_variant	2166	NA	NA	NA	NA	NA
29378545_1559980	29378545	G	Thupl.29378545s0011	Thupl.29378545s0011.1.v3.1	Transcript	3_prime_UTR_variant	2247	NA	NA	NA	NA	NA
29378545_2231858	29378545	C	Thupl.29378545s0014	Thupl.29378545s0014.1.v3.1	Transcript	3_prime_UTR_variant	2752	NA	NA	NA	NA	NA
29378545_3023018	29378545	A	Thupl.29378545s0018	Thupl.29378545s0018.1.v3.1	Transcript	3_prime_UTR_variant	2311	NA	NA	NA	NA	NA
29378545_4047829	29378545	G	Thupl.29378545s0022	Thupl.29378545s0022.1.v3.1	Transcript	3_prime_UTR_variant	2185	NA	NA	NA	NA	NA
29378545_4048041	29378545	A	Thupl.29378545s0022	Thupl.29378545s0022.1.v3.1	Transcript	3_prime_UTR_variant	2397	NA	NA	NA	NA	NA
29378545_4048056	29378545	A	Thupl.29378545s0022	Thupl.29378545s0022.1.v3.1	Transcript	3_prime_UTR_variant	2412	NA	NA	NA	NA	NA
29378552_313018	29378552	C	Thupl.29378552s0002	Thupl.29378552s0002.1.v3.1	Transcript	3_prime_UTR_variant	1655	NA	NA	NA	NA	NA
29378558_2702459	29378558	T	Thupl.29378558s0013	Thupl.29378558s0013.1.v3.1	Transcript	3_prime_UTR_variant	1720	NA	NA	NA	NA	NA
29378558_2702478	29378558	C	Thupl.29378558s0013	Thupl.29378558s0013.1.v3.1	Transcript	3_prime_UTR_variant	1701	NA	NA	NA	NA	NA
29378567_420794	29378567	C	Thupl.29378567s0004	Thupl.29378567s0004.1.v3.1	Transcript	3_prime_UTR_variant	2844	NA	NA	NA	NA	NA
29378567_420851	29378567	C	Thupl.29378567s0004	Thupl.29378567s0004.1.v3.1	Transcript	3_prime_UTR_variant	2901	NA	NA	NA	NA	NA
29378568_190048	29378568	A	Thupl.29378568s0001	Thupl.29378568s0001.1.v3.1	Transcript	3_prime_UTR_variant	2781	NA	NA	NA	NA	NA
29378568_840712	29378568	G	Thupl.29378568s0004	Thupl.29378568s0004.1.v3.1	Transcript	3_prime_UTR_variant	3453	NA	NA	NA	NA	NA
29378568_840713	29378568	C	Thupl.29378568s0004	Thupl.29378568s0004.1.v3.1	Transcript	3_prime_UTR_variant	3452	NA	NA	NA	NA	NA
29378590_1109063	29378590	G	Thupl.29378590s0005	Thupl.29378590s0005.1.v3.1	Transcript	3_prime_UTR_variant	3108	NA	NA	NA	NA	NA
29378590_1109150	29378590	T	Thupl.29378590s0005	Thupl.29378590s0005.1.v3.1	Transcript	3_prime_UTR_variant	3021	NA	NA	NA	NA	NA
29378590_1694180	29378590	C	Thupl.29378590s0006	Thupl.29378590s0006.1.v3.1	Transcript	3_prime_UTR_variant	2324	NA	NA	NA	NA	NA
29378590_2810620	29378590	C	Thupl.29378590s0015	Thupl.29378590s0015.1.v3.1	Transcript	3_prime_UTR_variant	1018	NA	NA	NA	NA	NA
29378590_3257507	29378590	A	Thupl.29378590s0017	Thupl.29378590s0017.1.v3.1	Transcript	3_prime_UTR_variant	1661	NA	NA	NA	NA	NA
29378590_3257708	29378590	C	Thupl.29378590s0017	Thupl.29378590s0017.1.v3.1	Transcript	3_prime_UTR_variant	1862	NA	NA	NA	NA	NA
29378590_3257709	29378590	T	Thupl.29378590s0017	Thupl.29378590s0017.1.v3.1	Transcript	3_prime_UTR_variant	1863	NA	NA	NA	NA	NA
29378592_1009953	29378592	A	Thupl.29378592s0007	Thupl.29378592s0007.1.v3.1	Transcript	3_prime_UTR_variant	804	NA	NA	NA	NA	NA
29378597_244763	29378597	T	Thupl.29378597s0002	Thupl.29378597s0002.1.v3.1	Transcript	3_prime_UTR_variant	945	NA	NA	NA	NA	NA
29378597_244823	29378597	A	Thupl.29378597s0002	Thupl.29378597s0002.1.v3.1	Transcript	3_prime_UTR_variant	885	NA	NA	NA	NA	NA
29378597_915898	29378597	A	Thupl.29378597s0003	Thupl.29378597s0003.1.v3.1	Transcript	3_prime_UTR_variant	3363	NA	NA	NA	NA	NA
29378604_1593896	29378604	C	Thupl.29378604s0006	Thupl.29378604s0006.1.v3.1	Transcript	3_prime_UTR_variant	1124	NA	NA	NA	NA	NA
29378604_1593962	29378604	C	Thupl.29378604s0006	Thupl.29378604s0006.1.v3.1	Transcript	3_prime_UTR_variant	1190	NA	NA	NA	NA	NA
29378604_2024083	29378604	T	Thupl.29378604s0011	Thupl.29378604s0011.1.v3.1	Transcript	3_prime_UTR_variant	2644	NA	NA	NA	NA	NA
29378604_2024128	29378604	T	Thupl.29378604s0011	Thupl.29378604s0011.1.v3.1	Transcript	3_prime_UTR_variant	2689	NA	NA	NA	NA	NA
29378612_105882	29378612	T	Thupl.29378612s0003	Thupl.29378612s0003.1.v3.1	Transcript	3_prime_UTR_variant	1109	NA	NA	NA	NA	NA
29378612_105919	29378612	A	Thupl.29378612s0003	Thupl.29378612s0003.1.v3.1	Transcript	3_prime_UTR_variant	1072	NA	NA	NA	NA	NA
29378612_105933	29378612	G	Thupl.29378612s0003	Thupl.29378612s0003.1.v3.1	Transcript	3_prime_UTR_variant	1058	NA	NA	NA	NA	NA
29378621_1819629	29378621	G	Thupl.29378621s0006	Thupl.29378621s0006.1.v3.1	Transcript	3_prime_UTR_variant	837	NA	NA	NA	NA	NA
29378621_6302749	29378621	G	Thupl.29378621s0026	Thupl.29378621s0026.1.v3.1	Transcript	3_prime_UTR_variant	851	NA	NA	NA	NA	NA
29378621_6302755	29378621	G	Thupl.29378621s0026	Thupl.29378621s0026.1.v3.1	Transcript	3_prime_UTR_variant	857	NA	NA	NA	NA	NA
29378631_1288730	29378631	G	Thupl.29378631s0002	Thupl.29378631s0002.1.v3.1	Transcript	3_prime_UTR_variant	1054	NA	NA	NA	NA	NA
29378632_1068690	29378632	C	Thupl.29378632s0003	Thupl.29378632s0003.1.v3.1	Transcript	3_prime_UTR_variant	2448	NA	NA	NA	NA	NA
29378632_1068770	29378632	G	Thupl.29378632s0003	Thupl.29378632s0003.1.v3.1	Transcript	3_prime_UTR_variant	2528	NA	NA	NA	NA	NA
29378632_1068828	29378632	T	Thupl.29378632s0003	Thupl.29378632s0003.1.v3.1	Transcript	3_prime_UTR_variant	2586	NA	NA	NA	NA	NA
29378636_1476345	29378636	A	Thupl.29378636s0004	Thupl.29378636s0004.1.v3.1	Transcript	3_prime_UTR_variant	1196	NA	NA	NA	NA	NA
29378636_4197644	29378636	T	Thupl.29378636s0011	Thupl.29378636s0011.1.v3.1	Transcript	3_prime_UTR_variant	1878	NA	NA	NA	NA	NA
29378636_4197698	29378636	A	Thupl.29378636s0011	Thupl.29378636s0011.1.v3.1	Transcript	3_prime_UTR_variant	1932	NA	NA	NA	NA	NA
29378637_732435	29378637	C	Thupl.29378637s0001	Thupl.29378637s0001.1.v3.1	Transcript	3_prime_UTR_variant	1364	NA	NA	NA	NA	NA
29378637_732494	29378637	A	Thupl.29378637s0001	Thupl.29378637s0001.1.v3.1	Transcript	3_prime_UTR_variant	1423	NA	NA	NA	NA	NA
29378637_3246513	29378637	T	Thupl.29378637s0025	Thupl.29378637s0025.1.v3.1	Transcript	3_prime_UTR_variant	1573	NA	NA	NA	NA	NA
29378637_3246536	29378637	T	Thupl.29378637s0025	Thupl.29378637s0025.1.v3.1	Transcript	3_prime_UTR_variant	1596	NA	NA	NA	NA	NA
29378637_3246600	29378637	G	Thupl.29378637s0025	Thupl.29378637s0025.1.v3.1	Transcript	3_prime_UTR_variant	1660	NA	NA	NA	NA	NA
29378637_3246673	29378637	G	Thupl.29378637s0025	Thupl.29378637s0025.1.v3.1	Transcript	3_prime_UTR_variant	1733	NA	NA	NA	NA	NA
29378644_495870	29378644	G	Thupl.29378644s0003	Thupl.29378644s0003.1.v3.1	Transcript	3_prime_UTR_variant	978	NA	NA	NA	NA	NA
29378644_495887	29378644	T	Thupl.29378644s0003	Thupl.29378644s0003.1.v3.1	Transcript	3_prime_UTR_variant	995	NA	NA	NA	NA	NA
29378644_495900	29378644	T	Thupl.29378644s0003	Thupl.29378644s0003.1.v3.1	Transcript	3_prime_UTR_variant	1008	NA	NA	NA	NA	NA
29378644_495938	29378644	T	Thupl.29378644s0003	Thupl.29378644s0003.1.v3.1	Transcript	3_prime_UTR_variant	1046	NA	NA	NA	NA	NA
29378644_495949	29378644	C	Thupl.29378644s0003	Thupl.29378644s0003.1.v3.1	Transcript	3_prime_UTR_variant	1057	NA	NA	NA	NA	NA
29378645_360266	29378645	T	Thupl.29378645s0001	Thupl.29378645s0001.1.v3.1	Transcript	3_prime_UTR_variant	3705	NA	NA	NA	NA	NA
29378651_656721	29378651	A	Thupl.29378651s0002	Thupl.29378651s0002.1.v3.1	Transcript	3_prime_UTR_variant	1220	NA	NA	NA	NA	NA
29378652_529516	29378652	G	Thupl.29378652s0002	Thupl.29378652s0002.1.v3.1	Transcript	3_prime_UTR_variant	2161	NA	NA	NA	NA	NA
29378652_529517	29378652	T	Thupl.29378652s0002	Thupl.29378652s0002.1.v3.1	Transcript	3_prime_UTR_variant	2160	NA	NA	NA	NA	NA
29378653_717679	29378653	C	Thupl.29378653s0005	Thupl.29378653s0005.1.v3.1	Transcript	3_prime_UTR_variant	510	NA	NA	NA	NA	NA
29378654_1286150	29378654	C	Thupl.29378654s0007	Thupl.29378654s0007.1.v3.1	Transcript	3_prime_UTR_variant	2136	NA	NA	NA	NA	NA
29378657_336969	29378657	T	Thupl.29378657s0004	Thupl.29378657s0004.1.v3.1	Transcript	3_prime_UTR_variant	2395	NA	NA	NA	NA	NA
29378666_3222374	29378666	A	Thupl.29378666s0021	Thupl.29378666s0021.1.v3.1	Transcript	3_prime_UTR_variant	1020	NA	NA	NA	NA	NA
29378667_445269	29378667	A	Thupl.29378667s0002	Thupl.29378667s0002.3.v3.1	Transcript	3_prime_UTR_variant	1983	NA	NA	NA	NA	NA
29378675_234598	29378675	G	Thupl.29378675s0001	Thupl.29378675s0001.1.v3.1	Transcript	3_prime_UTR_variant	312	NA	NA	NA	NA	NA
29378682_1173569	29378682	C	Thupl.29378682s0004	Thupl.29378682s0004.1.v3.1	Transcript	3_prime_UTR_variant	3786	NA	NA	NA	NA	NA
29378682_2070047	29378682	G	Thupl.29378682s0006	Thupl.29378682s0006.1.v3.1	Transcript	3_prime_UTR_variant	1655	NA	NA	NA	NA	NA
29378682_2324205	29378682	C	Thupl.29378682s0008	Thupl.29378682s0008.1.v3.1	Transcript	3_prime_UTR_variant	1827	NA	NA	NA	NA	NA
29378682_2324262	29378682	C	Thupl.29378682s0008	Thupl.29378682s0008.1.v3.1	Transcript	3_prime_UTR_variant	1884	NA	NA	NA	NA	NA
29378682_2324430	29378682	C	Thupl.29378682s0008	Thupl.29378682s0008.1.v3.1	Transcript	3_prime_UTR_variant	2052	NA	NA	NA	NA	NA
29378682_2324455	29378682	G	Thupl.29378682s0008	Thupl.29378682s0008.1.v3.1	Transcript	3_prime_UTR_variant	2077	NA	NA	NA	NA	NA
29378689_146684	29378689	A	Thupl.29378689s0001	Thupl.29378689s0001.1.v3.1	Transcript	3_prime_UTR_variant	1575	NA	NA	NA	NA	NA
29378713_770683	29378713	C	Thupl.29378713s0004	Thupl.29378713s0004.1.v3.1	Transcript	3_prime_UTR_variant	1893	NA	NA	NA	NA	NA
29378716_420961	29378716	C	Thupl.29378716s0002	Thupl.29378716s0002.1.v3.1	Transcript	3_prime_UTR_variant	1009	NA	NA	NA	NA	NA
29378716_421027	29378716	G	Thupl.29378716s0002	Thupl.29378716s0002.1.v3.1	Transcript	3_prime_UTR_variant	1075	NA	NA	NA	NA	NA
29378717_262501	29378717	A	Thupl.29378717s0001	Thupl.29378717s0001.1.v3.1	Transcript	3_prime_UTR_variant	1828	NA	NA	NA	NA	NA
29378717_1362873	29378717	G	Thupl.29378717s0004	Thupl.29378717s0004.1.v3.1	Transcript	3_prime_UTR_variant	2507	NA	NA	NA	NA	NA
29378717_1362926	29378717	C	Thupl.29378717s0004	Thupl.29378717s0004.1.v3.1	Transcript	3_prime_UTR_variant	2560	NA	NA	NA	NA	NA
29378717_1362996	29378717	G	Thupl.29378717s0004	Thupl.29378717s0004.1.v3.1	Transcript	3_prime_UTR_variant	2630	NA	NA	NA	NA	NA
29378728_2274502	29378728	A	Thupl.29378728s0010	Thupl.29378728s0010.1.v3.1	Transcript	3_prime_UTR_variant	1993	NA	NA	NA	NA	NA
29378728_2274537	29378728	C	Thupl.29378728s0010	Thupl.29378728s0010.1.v3.1	Transcript	3_prime_UTR_variant	1958	NA	NA	NA	NA	NA
29378729_1389748	29378729	A	Thupl.29378729s0005	Thupl.29378729s0005.1.v3.1	Transcript	3_prime_UTR_variant	3086	NA	NA	NA	NA	NA
29378729_1390225	29378729	C	Thupl.29378729s0005	Thupl.29378729s0005.2.v3.1	Transcript	3_prime_UTR_variant	3187	NA	NA	NA	NA	NA
29378729_1390273	29378729	A	Thupl.29378729s0005	Thupl.29378729s0005.2.v3.1	Transcript	3_prime_UTR_variant	3139	NA	NA	NA	NA	NA
29378729_1390306	29378729	C	Thupl.29378729s0005	Thupl.29378729s0005.2.v3.1	Transcript	3_prime_UTR_variant	3106	NA	NA	NA	NA	NA
29378735_7046335	29378735	T	Thupl.29378735s0024	Thupl.29378735s0024.1.v3.1	Transcript	3_prime_UTR_variant	366	NA	NA	NA	NA	NA
29378735_7046416	29378735	A	Thupl.29378735s0024	Thupl.29378735s0024.1.v3.1	Transcript	3_prime_UTR_variant	285	NA	NA	NA	NA	NA
29378735_8270916	29378735	T	Thupl.29378735s0028	Thupl.29378735s0028.1.v3.1	Transcript	3_prime_UTR_variant	1964	NA	NA	NA	NA	NA
29378735_8271048	29378735	A	Thupl.29378735s0028	Thupl.29378735s0028.1.v3.1	Transcript	3_prime_UTR_variant	2096	NA	NA	NA	NA	NA
29378735_10930442	29378735	A	Thupl.29378735s0040	Thupl.29378735s0040.1.v3.1	Transcript	3_prime_UTR_variant	913	NA	NA	NA	NA	NA
29378735_11090633	29378735	A	Thupl.29378735s0043	Thupl.29378735s0043.1.v3.1	Transcript	3_prime_UTR_variant	2209	NA	NA	NA	NA	NA
29378736_1813028	29378736	A	Thupl.29378736s0014	Thupl.29378736s0014.1.v3.1	Transcript	3_prime_UTR_variant	2295	NA	NA	NA	NA	NA
29378736_2511759	29378736	C	Thupl.29378736s0020	Thupl.29378736s0020.1.v3.1	Transcript	3_prime_UTR_variant	1815	NA	NA	NA	NA	NA
29378740_1576642	29378740	G	Thupl.29378740s0002	Thupl.29378740s0002.1.v3.1	Transcript	3_prime_UTR_variant	2769	NA	NA	NA	NA	NA
29378740_5032816	29378740	G	Thupl.29378740s0016	Thupl.29378740s0016.1.v3.1	Transcript	3_prime_UTR_variant	2639	NA	NA	NA	NA	NA
29378749_308394	29378749	G	Thupl.29378749s0005	Thupl.29378749s0005.1.v3.1	Transcript	3_prime_UTR_variant	3008	NA	NA	NA	NA	NA
29378750_2548294	29378750	T	Thupl.29378750s0008	Thupl.29378750s0008.1.v3.1	Transcript	3_prime_UTR_variant	957	NA	NA	NA	NA	NA
29378750_2548336	29378750	T	Thupl.29378750s0008	Thupl.29378750s0008.1.v3.1	Transcript	3_prime_UTR_variant	999	NA	NA	NA	NA	NA
29378750_2548357	29378750	A	Thupl.29378750s0008	Thupl.29378750s0008.1.v3.1	Transcript	3_prime_UTR_variant	1020	NA	NA	NA	NA	NA
29378765_1983157	29378765	A	Thupl.29378765s0005	Thupl.29378765s0005.1.v3.1	Transcript	3_prime_UTR_variant	1531	NA	NA	NA	NA	NA
29378771_198010	29378771	G	Thupl.29378771s0005	Thupl.29378771s0005.1.v3.1	Transcript	3_prime_UTR_variant	1290	NA	NA	NA	NA	NA
29378771_198124	29378771	A	Thupl.29378771s0005	Thupl.29378771s0005.1.v3.1	Transcript	3_prime_UTR_variant	1404	NA	NA	NA	NA	NA
29378771_198400	29378771	A	Thupl.29378771s0005	Thupl.29378771s0005.1.v3.1	Transcript	3_prime_UTR_variant	1680	NA	NA	NA	NA	NA
29378771_198430	29378771	G	Thupl.29378771s0005	Thupl.29378771s0005.1.v3.1	Transcript	3_prime_UTR_variant	1710	NA	NA	NA	NA	NA
29378771_198435	29378771	T	Thupl.29378771s0005	Thupl.29378771s0005.1.v3.1	Transcript	3_prime_UTR_variant	1715	NA	NA	NA	NA	NA
29378772_511924	29378772	T	Thupl.29378772s0006	Thupl.29378772s0006.1.v3.1	Transcript	3_prime_UTR_variant	1421	NA	NA	NA	NA	NA
29378772_511953	29378772	A	Thupl.29378772s0006	Thupl.29378772s0006.1.v3.1	Transcript	3_prime_UTR_variant	1450	NA	NA	NA	NA	NA
29378777_762494	29378777	G	Thupl.29378777s0002	Thupl.29378777s0002.1.v3.1	Transcript	3_prime_UTR_variant	971	NA	NA	NA	NA	NA
29378777_762495	29378777	C	Thupl.29378777s0002	Thupl.29378777s0002.1.v3.1	Transcript	3_prime_UTR_variant	972	NA	NA	NA	NA	NA
29378777_762503	29378777	G	Thupl.29378777s0002	Thupl.29378777s0002.1.v3.1	Transcript	3_prime_UTR_variant	980	NA	NA	NA	NA	NA
29378777_5023657	29378777	C	Thupl.29378777s0027	Thupl.29378777s0027.1.v3.1	Transcript	3_prime_UTR_variant	1411	NA	NA	NA	NA	NA
29378789_316009	29378789	T	Thupl.29378789s0002	Thupl.29378789s0002.1.v3.1	Transcript	3_prime_UTR_variant	882	NA	NA	NA	NA	NA
29378798_1396153	29378798	G	Thupl.29378798s0006	Thupl.29378798s0006.2.v3.1	Transcript	3_prime_UTR_variant	2335	NA	NA	NA	NA	NA
29378798_1396160	29378798	T	Thupl.29378798s0006	Thupl.29378798s0006.2.v3.1	Transcript	3_prime_UTR_variant	2328	NA	NA	NA	NA	NA
29378800_2781542	29378800	A	Thupl.29378800s0012	Thupl.29378800s0012.1.v3.1	Transcript	3_prime_UTR_variant	1600	NA	NA	NA	NA	NA
29378803_8824343	29378803	T	Thupl.29378803s0033	Thupl.29378803s0033.1.v3.1	Transcript	3_prime_UTR_variant	2910	NA	NA	NA	NA	NA
29378807_120175	29378807	G	Thupl.29378807s0001	Thupl.29378807s0001.1.v3.1	Transcript	3_prime_UTR_variant	1303	NA	NA	NA	NA	NA
29378810_186631	29378810	T	Thupl.29378810s0003	Thupl.29378810s0003.1.v3.1	Transcript	3_prime_UTR_variant	2879	NA	NA	NA	NA	NA
29378810_435712	29378810	G	Thupl.29378810s0005	Thupl.29378810s0005.1.v3.1	Transcript	3_prime_UTR_variant	980	NA	NA	NA	NA	NA
29378811_113710	29378811	A	Thupl.29378811s0003	Thupl.29378811s0003.2.v3.1	Transcript	3_prime_UTR_variant	1004	NA	NA	NA	NA	NA
29378811_113898	29378811	T	Thupl.29378811s0003	Thupl.29378811s0003.2.v3.1	Transcript	3_prime_UTR_variant	1192	NA	NA	NA	NA	NA
29378811_113920	29378811	T	Thupl.29378811s0003	Thupl.29378811s0003.2.v3.1	Transcript	3_prime_UTR_variant	1214	NA	NA	NA	NA	NA
29378819_1343416	29378819	G	Thupl.29378819s0008	Thupl.29378819s0008.1.v3.1	Transcript	3_prime_UTR_variant	2082	NA	NA	NA	NA	NA
29378819_1343448	29378819	G	Thupl.29378819s0008	Thupl.29378819s0008.1.v3.1	Transcript	3_prime_UTR_variant	2114	NA	NA	NA	NA	NA
29378819_2525786	29378819	T	Thupl.29378819s0013	Thupl.29378819s0013.1.v3.1	Transcript	3_prime_UTR_variant	1293	NA	NA	NA	NA	NA
29378820_3576916	29378820	T	Thupl.29378820s0020	Thupl.29378820s0020.1.v3.1	Transcript	3_prime_UTR_variant	3622	NA	NA	NA	NA	NA
29378826_707901	29378826	G	Thupl.29378826s0004	Thupl.29378826s0004.1.v3.1	Transcript	3_prime_UTR_variant	3829	NA	NA	NA	NA	NA
29378826_707974	29378826	T	Thupl.29378826s0004	Thupl.29378826s0004.1.v3.1	Transcript	3_prime_UTR_variant	3902	NA	NA	NA	NA	NA
29378826_708126	29378826	A	Thupl.29378826s0004	Thupl.29378826s0004.1.v3.1	Transcript	3_prime_UTR_variant	4054	NA	NA	NA	NA	NA
29378826_1169726	29378826	G	Thupl.29378826s0008	Thupl.29378826s0008.1.v3.1	Transcript	3_prime_UTR_variant	2520	NA	NA	NA	NA	NA
29378829_864987	29378829	T	Thupl.29378829s0006	Thupl.29378829s0006.1.v3.1	Transcript	3_prime_UTR_variant	991	NA	NA	NA	NA	NA
29378829_865120	29378829	A	Thupl.29378829s0006	Thupl.29378829s0006.1.v3.1	Transcript	3_prime_UTR_variant	858	NA	NA	NA	NA	NA
29378832_674090	29378832	A	Thupl.29378832s0006	Thupl.29378832s0006.1.v3.1	Transcript	3_prime_UTR_variant	4175	NA	NA	NA	NA	NA
29378832_1386849	29378832	A	Thupl.29378832s0010	Thupl.29378832s0010.1.v3.1	Transcript	3_prime_UTR_variant	2400	NA	NA	NA	NA	NA
29378839_1318177	29378839	G	Thupl.29378839s0005	Thupl.29378839s0005.1.v3.1	Transcript	3_prime_UTR_variant	3779	NA	NA	NA	NA	NA
29378852_316385	29378852	C	Thupl.29378852s0001	Thupl.29378852s0001.1.v3.1	Transcript	3_prime_UTR_variant	2520	NA	NA	NA	NA	NA
29378852_316458	29378852	A	Thupl.29378852s0001	Thupl.29378852s0001.1.v3.1	Transcript	3_prime_UTR_variant	2447	NA	NA	NA	NA	NA
29378852_316480	29378852	A	Thupl.29378852s0001	Thupl.29378852s0001.1.v3.1	Transcript	3_prime_UTR_variant	2425	NA	NA	NA	NA	NA
29378852_316487	29378852	C	Thupl.29378852s0001	Thupl.29378852s0001.1.v3.1	Transcript	3_prime_UTR_variant	2418	NA	NA	NA	NA	NA
29378852_316546	29378852	G	Thupl.29378852s0001	Thupl.29378852s0001.1.v3.1	Transcript	3_prime_UTR_variant	2359	NA	NA	NA	NA	NA
29378852_1608832	29378852	T	Thupl.29378852s0007	Thupl.29378852s0007.1.v3.1	Transcript	3_prime_UTR_variant	2196	NA	NA	NA	NA	NA
29378855_5433636	29378855	A	Thupl.29378855s0014	Thupl.29378855s0014.1.v3.1	Transcript	3_prime_UTR_variant	908	NA	NA	NA	NA	NA
29378855_5433731	29378855	C	Thupl.29378855s0014	Thupl.29378855s0014.1.v3.1	Transcript	3_prime_UTR_variant	813	NA	NA	NA	NA	NA
29378858_72320	29378858	A	Thupl.29378858s0001	Thupl.29378858s0001.1.v3.1	Transcript	3_prime_UTR_variant	1067	NA	NA	NA	NA	NA
29378858_72326	29378858	A	Thupl.29378858s0001	Thupl.29378858s0001.1.v3.1	Transcript	3_prime_UTR_variant	1073	NA	NA	NA	NA	NA
29378858_72334	29378858	C	Thupl.29378858s0001	Thupl.29378858s0001.1.v3.1	Transcript	3_prime_UTR_variant	1081	NA	NA	NA	NA	NA
29378862_399267	29378862	A	Thupl.29378862s0003	Thupl.29378862s0003.1.v3.1	Transcript	3_prime_UTR_variant	1183	NA	NA	NA	NA	NA
29378868_498444	29378868	G	Thupl.29378868s0001	Thupl.29378868s0001.1.v3.1	Transcript	3_prime_UTR_variant	1935	NA	NA	NA	NA	NA
29378868_498459	29378868	G	Thupl.29378868s0001	Thupl.29378868s0001.1.v3.1	Transcript	3_prime_UTR_variant	1950	NA	NA	NA	NA	NA
29378868_498469	29378868	T	Thupl.29378868s0001	Thupl.29378868s0001.1.v3.1	Transcript	3_prime_UTR_variant	1960	NA	NA	NA	NA	NA
29378868_3006675	29378868	A	Thupl.29378868s0013	Thupl.29378868s0013.1.v3.1	Transcript	3_prime_UTR_variant	2033	NA	NA	NA	NA	NA
29378874_717928	29378874	T	Thupl.29378874s0007	Thupl.29378874s0007.1.v3.1	Transcript	3_prime_UTR_variant	1140	NA	NA	NA	NA	NA
29378874_1321375	29378874	G	Thupl.29378874s0012	Thupl.29378874s0012.1.v3.1	Transcript	3_prime_UTR_variant	1161	NA	NA	NA	NA	NA
29378876_189403	29378876	G	Thupl.29378876s0001	Thupl.29378876s0001.1.v3.1	Transcript	3_prime_UTR_variant	4892	NA	NA	NA	NA	NA
29378876_4667764	29378876	A	Thupl.29378876s0016	Thupl.29378876s0016.1.v3.1	Transcript	3_prime_UTR_variant	4267	NA	NA	NA	NA	NA
29378876_4667792	29378876	A	Thupl.29378876s0016	Thupl.29378876s0016.1.v3.1	Transcript	3_prime_UTR_variant	4239	NA	NA	NA	NA	NA
29378877_2825132	29378877	G	Thupl.29378877s0012	Thupl.29378877s0012.1.v3.1	Transcript	3_prime_UTR_variant	2279	NA	NA	NA	NA	NA
29378877_2825198	29378877	G	Thupl.29378877s0012	Thupl.29378877s0012.1.v3.1	Transcript	3_prime_UTR_variant	2213	NA	NA	NA	NA	NA
29378877_2825631	29378877	T	Thupl.29378877s0012	Thupl.29378877s0012.1.v3.1	Transcript	3_prime_UTR_variant	1780	NA	NA	NA	NA	NA
29378878_1179221	29378878	A	Thupl.29378878s0009	Thupl.29378878s0009.1.v3.1	Transcript	3_prime_UTR_variant	1501	NA	NA	NA	NA	NA
29378878_8197012	29378878	T	Thupl.29378878s0047	Thupl.29378878s0047.1.v3.1	Transcript	3_prime_UTR_variant	1821	NA	NA	NA	NA	NA
29378878_8197201	29378878	G	Thupl.29378878s0047	Thupl.29378878s0047.1.v3.1	Transcript	3_prime_UTR_variant	1632	NA	NA	NA	NA	NA
29378878_8611917	29378878	G	Thupl.29378878s0049	Thupl.29378878s0049.1.v3.1	Transcript	3_prime_UTR_variant	5262	NA	NA	NA	NA	NA
29378878_9422009	29378878	T	Thupl.29378878s0054	Thupl.29378878s0054.1.v3.1	Transcript	3_prime_UTR_variant	952	NA	NA	NA	NA	NA
29378884_115988	29378884	C	Thupl.29378884s0001	Thupl.29378884s0001.1.v3.1	Transcript	3_prime_UTR_variant	2865	NA	NA	NA	NA	NA
29378884_116022	29378884	T	Thupl.29378884s0001	Thupl.29378884s0001.1.v3.1	Transcript	3_prime_UTR_variant	2899	NA	NA	NA	NA	NA
29378884_1021385	29378884	G	Thupl.29378884s0006	Thupl.29378884s0006.1.v3.1	Transcript	3_prime_UTR_variant	1296	NA	NA	NA	NA	NA
29378888_116329	29378888	T	Thupl.29378888s0003	Thupl.29378888s0003.1.v3.1	Transcript	3_prime_UTR_variant	914	NA	NA	NA	NA	NA
29378888_116364	29378888	A	Thupl.29378888s0003	Thupl.29378888s0003.1.v3.1	Transcript	3_prime_UTR_variant	949	NA	NA	NA	NA	NA
29378890_896247	29378890	G	Thupl.29378890s0002	Thupl.29378890s0002.1.v3.1	Transcript	3_prime_UTR_variant	1649	NA	NA	NA	NA	NA
29378890_896250	29378890	T	Thupl.29378890s0002	Thupl.29378890s0002.1.v3.1	Transcript	3_prime_UTR_variant	1646	NA	NA	NA	NA	NA
29378890_5507927	29378890	A	Thupl.29378890s0013	Thupl.29378890s0013.1.v3.1	Transcript	3_prime_UTR_variant	2314	NA	NA	NA	NA	NA
29378890_5507983	29378890	C	Thupl.29378890s0013	Thupl.29378890s0013.1.v3.1	Transcript	3_prime_UTR_variant	2370	NA	NA	NA	NA	NA
29378896_14809649	29378896	T	Thupl.29378896s0066	Thupl.29378896s0066.1.v3.1	Transcript	3_prime_UTR_variant	2798	NA	NA	NA	NA	NA
29378903_1369220	29378903	T	Thupl.29378903s0004	Thupl.29378903s0004.1.v3.1	Transcript	3_prime_UTR_variant	1298	NA	NA	NA	NA	NA
29378906_182784	29378906	G	Thupl.29378906s0003	Thupl.29378906s0003.1.v3.1	Transcript	3_prime_UTR_variant	1275	NA	NA	NA	NA	NA
29378907_206181	29378907	C	Thupl.29378907s0001	Thupl.29378907s0001.1.v3.1	Transcript	3_prime_UTR_variant	1505	NA	NA	NA	NA	NA
29378907_206466	29378907	C	Thupl.29378907s0001	Thupl.29378907s0001.1.v3.1	Transcript	3_prime_UTR_variant	1790	NA	NA	NA	NA	NA
29378908_63440	29378908	C	Thupl.29378908s0001	Thupl.29378908s0001.1.v3.1	Transcript	3_prime_UTR_variant	1330	NA	NA	NA	NA	NA
29378908_63573	29378908	C	Thupl.29378908s0001	Thupl.29378908s0001.1.v3.1	Transcript	3_prime_UTR_variant	1197	NA	NA	NA	NA	NA
29378908_501167	29378908	G	Thupl.29378908s0006	Thupl.29378908s0006.1.v3.1	Transcript	3_prime_UTR_variant	2141	NA	NA	NA	NA	NA
29378908_501381	29378908	T	Thupl.29378908s0006	Thupl.29378908s0006.1.v3.1	Transcript	3_prime_UTR_variant	1927	NA	NA	NA	NA	NA
29378908_2188691	29378908	T	Thupl.29378908s0031	Thupl.29378908s0031.1.v3.1	Transcript	3_prime_UTR_variant	1636	NA	NA	NA	NA	NA
29378909_1208387	29378909	C	Thupl.29378909s0005	Thupl.29378909s0005.1.v3.1	Transcript	3_prime_UTR_variant	4060	NA	NA	NA	NA	NA
29378909_2003278	29378909	C	Thupl.29378909s0007	Thupl.29378909s0007.1.v3.1	Transcript	3_prime_UTR_variant	1963	NA	NA	NA	NA	NA
29378909_2003329	29378909	C	Thupl.29378909s0007	Thupl.29378909s0007.1.v3.1	Transcript	3_prime_UTR_variant	2014	NA	NA	NA	NA	NA
29378909_2003450	29378909	G	Thupl.29378909s0007	Thupl.29378909s0007.1.v3.1	Transcript	3_prime_UTR_variant	2135	NA	NA	NA	NA	NA
29378909_2158586	29378909	C	Thupl.29378909s0009	Thupl.29378909s0009.1.v3.1	Transcript	3_prime_UTR_variant	1075	NA	NA	NA	NA	NA
29378915_65202	29378915	G	Thupl.29378915s0002	Thupl.29378915s0002.1.v3.1	Transcript	3_prime_UTR_variant	836	NA	NA	NA	NA	NA
29378917_2665178	29378917	G	Thupl.29378917s0010	Thupl.29378917s0010.1.v3.1	Transcript	3_prime_UTR_variant	1175	NA	NA	NA	NA	NA
29378924_1200800	29378924	G	Thupl.29378924s0004	Thupl.29378924s0004.1.v3.1	Transcript	3_prime_UTR_variant	1002	NA	NA	NA	NA	NA
29378928_3079180	29378928	G	Thupl.29378928s0006	Thupl.29378928s0006.1.v3.1	Transcript	3_prime_UTR_variant	3136	NA	NA	NA	NA	NA
29378928_4180928	29378928	A	Thupl.29378928s0012	Thupl.29378928s0012.1.v3.1	Transcript	3_prime_UTR_variant	3373	NA	NA	NA	NA	NA
29378960_795195	29378960	G	Thupl.29378960s0010	Thupl.29378960s0010.1.v3.1	Transcript	3_prime_UTR_variant	676	NA	NA	NA	NA	NA
29378964_3141532	29378964	A	Thupl.29378964s0018	Thupl.29378964s0018.1.v3.1	Transcript	3_prime_UTR_variant	1637	NA	NA	NA	NA	NA
29378965_1769572	29378965	A	Thupl.29378965s0006	Thupl.29378965s0006.1.v3.1	Transcript	3_prime_UTR_variant	1927	NA	NA	NA	NA	NA
29378965_1769583	29378965	G	Thupl.29378965s0006	Thupl.29378965s0006.1.v3.1	Transcript	3_prime_UTR_variant	1938	NA	NA	NA	NA	NA
29378965_1769603	29378965	C	Thupl.29378965s0006	Thupl.29378965s0006.1.v3.1	Transcript	3_prime_UTR_variant	1958	NA	NA	NA	NA	NA
29378965_1769626	29378965	C	Thupl.29378965s0006	Thupl.29378965s0006.1.v3.1	Transcript	3_prime_UTR_variant	1981	NA	NA	NA	NA	NA
29378967_152495	29378967	C	Thupl.29378967s0003	Thupl.29378967s0003.1.v3.1	Transcript	3_prime_UTR_variant	1901	NA	NA	NA	NA	NA
29378967_2398897	29378967	G	Thupl.29378967s0013	Thupl.29378967s0013.1.v3.1	Transcript	3_prime_UTR_variant	651	NA	NA	NA	NA	NA
29378967_3864152	29378967	C	Thupl.29378967s0022	Thupl.29378967s0022.1.v3.1	Transcript	3_prime_UTR_variant	2754	NA	NA	NA	NA	NA
29378967_3864272	29378967	C	Thupl.29378967s0022	Thupl.29378967s0022.1.v3.1	Transcript	3_prime_UTR_variant	2874	NA	NA	NA	NA	NA
29378969_832784	29378969	G	Thupl.29378969s0005	Thupl.29378969s0005.1.v3.1	Transcript	3_prime_UTR_variant	1284	NA	NA	NA	NA	NA
29378969_832846	29378969	A	Thupl.29378969s0005	Thupl.29378969s0005.1.v3.1	Transcript	3_prime_UTR_variant	1222	NA	NA	NA	NA	NA
29378970_858244	29378970	T	Thupl.29378970s0011	Thupl.29378970s0011.1.v3.1	Transcript	3_prime_UTR_variant	1620	NA	NA	NA	NA	NA
29378970_1769926	29378970	A	Thupl.29378970s0021	Thupl.29378970s0021.1.v3.1	Transcript	3_prime_UTR_variant	2988	NA	NA	NA	NA	NA
29378973_702936	29378973	T	Thupl.29378973s0006	Thupl.29378973s0006.1.v3.1	Transcript	3_prime_UTR_variant	1999	NA	NA	NA	NA	NA
29378973_702978	29378973	C	Thupl.29378973s0006	Thupl.29378973s0006.1.v3.1	Transcript	3_prime_UTR_variant	1957	NA	NA	NA	NA	NA
29378973_703022	29378973	C	Thupl.29378973s0006	Thupl.29378973s0006.1.v3.1	Transcript	3_prime_UTR_variant	1913	NA	NA	NA	NA	NA
29378975_766560	29378975	G	Thupl.29378975s0002	Thupl.29378975s0002.1.v3.1	Transcript	3_prime_UTR_variant	1155	NA	NA	NA	NA	NA
29378986_1005242	29378986	C	Thupl.29378986s0003	Thupl.29378986s0003.1.v3.1	Transcript	3_prime_UTR_variant	1371	NA	NA	NA	NA	NA
29378987_3057959	29378987	C	Thupl.29378987s0008	Thupl.29378987s0008.1.v3.1	Transcript	3_prime_UTR_variant	1020	NA	NA	NA	NA	NA
29378987_3058004	29378987	T	Thupl.29378987s0008	Thupl.29378987s0008.1.v3.1	Transcript	3_prime_UTR_variant	1065	NA	NA	NA	NA	NA
29378987_3058009	29378987	A	Thupl.29378987s0008	Thupl.29378987s0008.1.v3.1	Transcript	3_prime_UTR_variant	1070	NA	NA	NA	NA	NA
29378988_528560	29378988	C	Thupl.29378988s0003	Thupl.29378988s0003.1.v3.1	Transcript	3_prime_UTR_variant	1977	NA	NA	NA	NA	NA
29378996_577838	29378996	A	Thupl.29378996s0002	Thupl.29378996s0002.2.v3.1	Transcript	3_prime_UTR_variant	2094	NA	NA	NA	NA	NA
29378996_577939	29378996	T	Thupl.29378996s0002	Thupl.29378996s0002.1.v3.1	Transcript	3_prime_UTR_variant	2211	NA	NA	NA	NA	NA
29378999_2551917	29378999	G	Thupl.29378999s0005	Thupl.29378999s0005.1.v3.1	Transcript	3_prime_UTR_variant	3376	NA	NA	NA	NA	NA
29378999_2551966	29378999	T	Thupl.29378999s0005	Thupl.29378999s0005.1.v3.1	Transcript	3_prime_UTR_variant	3425	NA	NA	NA	NA	NA
29379015_2044219	29379015	G	Thupl.29379015s0003	Thupl.29379015s0003.1.v3.1	Transcript	3_prime_UTR_variant	1353	NA	NA	NA	NA	NA
29379015_2044264	29379015	T	Thupl.29379015s0003	Thupl.29379015s0003.1.v3.1	Transcript	3_prime_UTR_variant	1308	NA	NA	NA	NA	NA
29379015_2044286	29379015	A	Thupl.29379015s0003	Thupl.29379015s0003.1.v3.1	Transcript	3_prime_UTR_variant	1286	NA	NA	NA	NA	NA
29379017_959254	29379017	A	Thupl.29379017s0002	Thupl.29379017s0002.2.v3.1	Transcript	3_prime_UTR_variant	1379	NA	NA	NA	NA	NA
29379017_1091376	29379017	T	Thupl.29379017s0003	Thupl.29379017s0003.1.v3.1	Transcript	3_prime_UTR_variant	1288	NA	NA	NA	NA	NA
29379017_1091428	29379017	C	Thupl.29379017s0003	Thupl.29379017s0003.1.v3.1	Transcript	3_prime_UTR_variant	1236	NA	NA	NA	NA	NA
29379017_2805353	29379017	T	Thupl.29379017s0008	Thupl.29379017s0008.1.v3.1	Transcript	3_prime_UTR_variant	3504	NA	NA	NA	NA	NA
29379017_3128450	29379017	G	Thupl.29379017s0009	Thupl.29379017s0009.1.v3.1	Transcript	3_prime_UTR_variant	2066	NA	NA	NA	NA	NA
29379017_3289976	29379017	G	Thupl.29379017s0010	Thupl.29379017s0010.2.v3.1	Transcript	3_prime_UTR_variant	7767	NA	NA	NA	NA	NA
29379023_1096630	29379023	T	Thupl.29379023s0006	Thupl.29379023s0006.1.v3.1	Transcript	3_prime_UTR_variant	1030	NA	NA	NA	NA	NA
29379023_1096794	29379023	T	Thupl.29379023s0006	Thupl.29379023s0006.1.v3.1	Transcript	3_prime_UTR_variant	1194	NA	NA	NA	NA	NA
29379024_3774588	29379024	C	Thupl.29379024s0008	Thupl.29379024s0008.1.v3.1	Transcript	3_prime_UTR_variant	1241	NA	NA	NA	NA	NA
29379024_4613476	29379024	T	Thupl.29379024s0010	Thupl.29379024s0010.1.v3.1	Transcript	3_prime_UTR_variant	1783	NA	NA	NA	NA	NA
29379031_176240	29379031	G	Thupl.29379031s0002	Thupl.29379031s0002.1.v3.1	Transcript	3_prime_UTR_variant	2128	NA	NA	NA	NA	NA
29379031_176425	29379031	A	Thupl.29379031s0002	Thupl.29379031s0002.1.v3.1	Transcript	3_prime_UTR_variant	1943	NA	NA	NA	NA	NA
29379046_3459916	29379046	T	Thupl.29379046s0016	Thupl.29379046s0016.1.v3.1	Transcript	3_prime_UTR_variant	970	NA	NA	NA	NA	NA
29379046_3459924	29379046	C	Thupl.29379046s0016	Thupl.29379046s0016.1.v3.1	Transcript	3_prime_UTR_variant	978	NA	NA	NA	NA	NA
29379047_2086470	29379047	G	Thupl.29379047s0010	Thupl.29379047s0010.1.v3.1	Transcript	3_prime_UTR_variant	3667	NA	NA	NA	NA	NA
29379047_2086486	29379047	A	Thupl.29379047s0010	Thupl.29379047s0010.1.v3.1	Transcript	3_prime_UTR_variant	3683	NA	NA	NA	NA	NA
29379047_2556453	29379047	G	Thupl.29379047s0012	Thupl.29379047s0012.1.v3.1	Transcript	3_prime_UTR_variant	1471	NA	NA	NA	NA	NA
29379047_2707305	29379047	C	Thupl.29379047s0014	Thupl.29379047s0014.1.v3.1	Transcript	3_prime_UTR_variant	1172	NA	NA	NA	NA	NA
29379047_2707331	29379047	A	Thupl.29379047s0014	Thupl.29379047s0014.1.v3.1	Transcript	3_prime_UTR_variant	1198	NA	NA	NA	NA	NA
29379047_2708285	29379047	A	Thupl.29379047s0014	Thupl.29379047s0014.1.v3.1	Transcript	3_prime_UTR_variant	2152	NA	NA	NA	NA	NA
29379051_127132	29379051	T	Thupl.29379051s0001	Thupl.29379051s0001.1.v3.1	Transcript	3_prime_UTR_variant	891	NA	NA	NA	NA	NA
29379064_498344	29379064	T	Thupl.29379064s0001	Thupl.29379064s0001.1.v3.1	Transcript	3_prime_UTR_variant	1757	NA	NA	NA	NA	NA
29379064_1276583	29379064	T	Thupl.29379064s0003	Thupl.29379064s0003.2.v3.1	Transcript	3_prime_UTR_variant	550	NA	NA	NA	NA	NA
29379066_600474	29379066	C	Thupl.29379066s0002	Thupl.29379066s0002.1.v3.1	Transcript	3_prime_UTR_variant	2057	NA	NA	NA	NA	NA
29379066_600506	29379066	T	Thupl.29379066s0002	Thupl.29379066s0002.1.v3.1	Transcript	3_prime_UTR_variant	2089	NA	NA	NA	NA	NA
29379070_1013560	29379070	C	Thupl.29379070s0003	Thupl.29379070s0003.1.v3.1	Transcript	3_prime_UTR_variant	1671	NA	NA	NA	NA	NA
29379070_1013582	29379070	T	Thupl.29379070s0003	Thupl.29379070s0003.1.v3.1	Transcript	3_prime_UTR_variant	1649	NA	NA	NA	NA	NA
29379070_1013628	29379070	G	Thupl.29379070s0003	Thupl.29379070s0003.1.v3.1	Transcript	3_prime_UTR_variant	1603	NA	NA	NA	NA	NA
29379085_2585955	29379085	A	Thupl.29379085s0012	Thupl.29379085s0012.1.v3.1	Transcript	3_prime_UTR_variant	643	NA	NA	NA	NA	NA
29379086_352692	29379086	C	Thupl.29379086s0003	Thupl.29379086s0003.1.v3.1	Transcript	3_prime_UTR_variant	2918	NA	NA	NA	NA	NA
29379100_2959208	29379100	G	Thupl.29379100s0015	Thupl.29379100s0015.1.v3.1	Transcript	3_prime_UTR_variant	1405	NA	NA	NA	NA	NA
29379106_295158	29379106	G	Thupl.29379106s0002	Thupl.29379106s0002.1.v3.1	Transcript	3_prime_UTR_variant	627	NA	NA	NA	NA	NA
29379120_832883	29379120	T	Thupl.29379120s0005	Thupl.29379120s0005.1.v3.1	Transcript	3_prime_UTR_variant	796	NA	NA	NA	NA	NA
29379120_832993	29379120	T	Thupl.29379120s0005	Thupl.29379120s0005.1.v3.1	Transcript	3_prime_UTR_variant	906	NA	NA	NA	NA	NA
29379120_833005	29379120	G	Thupl.29379120s0005	Thupl.29379120s0005.1.v3.1	Transcript	3_prime_UTR_variant	918	NA	NA	NA	NA	NA
29379120_833009	29379120	C	Thupl.29379120s0005	Thupl.29379120s0005.1.v3.1	Transcript	3_prime_UTR_variant	922	NA	NA	NA	NA	NA
29379120_833010	29379120	A	Thupl.29379120s0005	Thupl.29379120s0005.1.v3.1	Transcript	3_prime_UTR_variant	923	NA	NA	NA	NA	NA
29379120_893311	29379120	G	Thupl.29379120s0007	Thupl.29379120s0007.1.v3.1	Transcript	3_prime_UTR_variant	3214	NA	NA	NA	NA	NA
29379120_893338	29379120	A	Thupl.29379120s0007	Thupl.29379120s0007.1.v3.1	Transcript	3_prime_UTR_variant	3187	NA	NA	NA	NA	NA
29379120_1241601	29379120	A	Thupl.29379120s0010	Thupl.29379120s0010.1.v3.1	Transcript	3_prime_UTR_variant	2357	NA	NA	NA	NA	NA
29379120_1241671	29379120	C	Thupl.29379120s0010	Thupl.29379120s0010.1.v3.1	Transcript	3_prime_UTR_variant	2287	NA	NA	NA	NA	NA
29379120_1503994	29379120	T	Thupl.29379120s0012	Thupl.29379120s0012.1.v3.1	Transcript	3_prime_UTR_variant	1188	NA	NA	NA	NA	NA
29379121_2096192	29379121	T	Thupl.29379121s0012	Thupl.29379121s0012.1.v3.1	Transcript	3_prime_UTR_variant	4009	NA	NA	NA	NA	NA
29379121_2250719	29379121	A	Thupl.29379121s0014	Thupl.29379121s0014.1.v3.1	Transcript	3_prime_UTR_variant	840	NA	NA	NA	NA	NA
29379121_2250781	29379121	C	Thupl.29379121s0014	Thupl.29379121s0014.1.v3.1	Transcript	3_prime_UTR_variant	778	NA	NA	NA	NA	NA
29379121_2250841	29379121	T	Thupl.29379121s0014	Thupl.29379121s0014.1.v3.1	Transcript	3_prime_UTR_variant	718	NA	NA	NA	NA	NA
29379126_1242622	29379126	T	Thupl.29379126s0007	Thupl.29379126s0007.1.v3.1	Transcript	3_prime_UTR_variant	1410	NA	NA	NA	NA	NA
29379126_1749241	29379126	C	Thupl.29379126s0011	Thupl.29379126s0011.1.v3.1	Transcript	3_prime_UTR_variant	672	NA	NA	NA	NA	NA
29379126_1749589	29379126	G	Thupl.29379126s0011	Thupl.29379126s0011.1.v3.1	Transcript	3_prime_UTR_variant	463	NA	NA	NA	NA	NA
29379126_1997420	29379126	A	Thupl.29379126s0012	Thupl.29379126s0012.1.v3.1	Transcript	3_prime_UTR_variant	658	NA	NA	NA	NA	NA
29379126_1997503	29379126	A	Thupl.29379126s0012	Thupl.29379126s0012.1.v3.1	Transcript	3_prime_UTR_variant	575	NA	NA	NA	NA	NA
29379126_1997611	29379126	A	Thupl.29379126s0012	Thupl.29379126s0012.1.v3.1	Transcript	3_prime_UTR_variant	467	NA	NA	NA	NA	NA
29379132_1386960	29379132	A	Thupl.29379132s0011	Thupl.29379132s0011.1.v3.1	Transcript	3_prime_UTR_variant	2451	NA	NA	NA	NA	NA
29379132_1387355	29379132	A	Thupl.29379132s0011	Thupl.29379132s0011.1.v3.1	Transcript	3_prime_UTR_variant	2846	NA	NA	NA	NA	NA
29379138_1387575	29379138	T	Thupl.29379138s0007	Thupl.29379138s0007.1.v3.1	Transcript	3_prime_UTR_variant	1298	NA	NA	NA	NA	NA
29379138_3214360	29379138	C	Thupl.29379138s0010	Thupl.29379138s0010.1.v3.1	Transcript	3_prime_UTR_variant	2506	NA	NA	NA	NA	NA
29379141_328717	29379141	A	Thupl.29379141s0002	Thupl.29379141s0002.1.v3.1	Transcript	3_prime_UTR_variant	2529	NA	NA	NA	NA	NA
29379141_328737	29379141	T	Thupl.29379141s0002	Thupl.29379141s0002.1.v3.1	Transcript	3_prime_UTR_variant	2509	NA	NA	NA	NA	NA
29379146_1613981	29379146	T	Thupl.29379146s0012	Thupl.29379146s0012.1.v3.1	Transcript	3_prime_UTR_variant	824	NA	NA	NA	NA	NA
29379146_2060592	29379146	T	Thupl.29379146s0015	Thupl.29379146s0015.1.v3.1	Transcript	3_prime_UTR_variant	1288	NA	NA	NA	NA	NA
29379159_322359	29379159	A	Thupl.29379159s0002	Thupl.29379159s0002.1.v3.1	Transcript	3_prime_UTR_variant	1213	NA	NA	NA	NA	NA
29379160_219797	29379160	G	Thupl.29379160s0001	Thupl.29379160s0001.1.v3.1	Transcript	3_prime_UTR_variant	1415	NA	NA	NA	NA	NA
29379160_2807047	29379160	G	Thupl.29379160s0018	Thupl.29379160s0018.1.v3.1	Transcript	3_prime_UTR_variant	2314	NA	NA	NA	NA	NA
29379160_2807082	29379160	G	Thupl.29379160s0018	Thupl.29379160s0018.1.v3.1	Transcript	3_prime_UTR_variant	2349	NA	NA	NA	NA	NA
29379160_3496338	29379160	T	Thupl.29379160s0021	Thupl.29379160s0021.1.v3.1	Transcript	3_prime_UTR_variant	3867	NA	NA	NA	NA	NA
29379160_4233695	29379160	A	Thupl.29379160s0027	Thupl.29379160s0027.1.v3.1	Transcript	3_prime_UTR_variant	556	NA	NA	NA	NA	NA
29379160_4233758	29379160	T	Thupl.29379160s0027	Thupl.29379160s0027.1.v3.1	Transcript	3_prime_UTR_variant	619	NA	NA	NA	NA	NA
29379160_4233762	29379160	T	Thupl.29379160s0027	Thupl.29379160s0027.1.v3.1	Transcript	3_prime_UTR_variant	623	NA	NA	NA	NA	NA
29379160_4233775	29379160	T	Thupl.29379160s0027	Thupl.29379160s0027.1.v3.1	Transcript	3_prime_UTR_variant	636	NA	NA	NA	NA	NA
29379160_4247291	29379160	A	Thupl.29379160s0027	Thupl.29379160s0027.1.v3.1	Transcript	3_prime_UTR_variant	748	NA	NA	NA	NA	NA
29379162_1048338	29379162	T	Thupl.29379162s0001	Thupl.29379162s0001.1.v3.1	Transcript	3_prime_UTR_variant	1721	NA	NA	NA	NA	NA
29379162_1048340	29379162	T	Thupl.29379162s0001	Thupl.29379162s0001.1.v3.1	Transcript	3_prime_UTR_variant	1719	NA	NA	NA	NA	NA
29379162_1048388	29379162	C	Thupl.29379162s0001	Thupl.29379162s0001.1.v3.1	Transcript	3_prime_UTR_variant	1671	NA	NA	NA	NA	NA
29379169_1853857	29379169	A	Thupl.29379169s0011	Thupl.29379169s0011.1.v3.1	Transcript	3_prime_UTR_variant	962	NA	NA	NA	NA	NA
29379169_2191549	29379169	T	Thupl.29379169s0012	Thupl.29379169s0012.2.v3.1	Transcript	3_prime_UTR_variant	3459	NA	NA	NA	NA	NA
29379169_2191556	29379169	A	Thupl.29379169s0012	Thupl.29379169s0012.2.v3.1	Transcript	3_prime_UTR_variant	3466	NA	NA	NA	NA	NA
29379170_1234162	29379170	G	Thupl.29379170s0003	Thupl.29379170s0003.1.v3.1	Transcript	3_prime_UTR_variant	2242	NA	NA	NA	NA	NA
29379179_1300334	29379179	C	Thupl.29379179s0005	Thupl.29379179s0005.1.v3.1	Transcript	3_prime_UTR_variant	884	NA	NA	NA	NA	NA
29379181_354908	29379181	G	Thupl.29379181s0002	Thupl.29379181s0002.1.v3.1	Transcript	3_prime_UTR_variant	2060	NA	NA	NA	NA	NA
29379184_944556	29379184	T	Thupl.29379184s0006	Thupl.29379184s0006.1.v3.1	Transcript	3_prime_UTR_variant	1650	NA	NA	NA	NA	NA
29379184_1453266	29379184	A	Thupl.29379184s0009	Thupl.29379184s0009.1.v3.1	Transcript	3_prime_UTR_variant	5481	NA	NA	NA	NA	NA
29379184_1453304	29379184	G	Thupl.29379184s0009	Thupl.29379184s0009.1.v3.1	Transcript	3_prime_UTR_variant	5519	NA	NA	NA	NA	NA
29379184_1888027	29379184	C	Thupl.29379184s0012	Thupl.29379184s0012.1.v3.1	Transcript	3_prime_UTR_variant	2389	NA	NA	NA	NA	NA
29379184_1888088	29379184	T	Thupl.29379184s0012	Thupl.29379184s0012.1.v3.1	Transcript	3_prime_UTR_variant	2328	NA	NA	NA	NA	NA
29379185_3923022	29379185	A	Thupl.29379185s0006	Thupl.29379185s0006.1.v3.1	Transcript	3_prime_UTR_variant	1645	NA	NA	NA	NA	NA
29379185_11259585	29379185	A	Thupl.29379185s0030	Thupl.29379185s0030.1.v3.1	Transcript	3_prime_UTR_variant	1737	NA	NA	NA	NA	NA
29379185_11259647	29379185	C	Thupl.29379185s0030	Thupl.29379185s0030.1.v3.1	Transcript	3_prime_UTR_variant	1675	NA	NA	NA	NA	NA
29379186_401212	29379186	G	Thupl.29379186s0004	Thupl.29379186s0004.1.v3.1	Transcript	3_prime_UTR_variant	2882	NA	NA	NA	NA	NA
29379186_572791	29379186	G	Thupl.29379186s0006	Thupl.29379186s0006.1.v3.1	Transcript	3_prime_UTR_variant	3781	NA	NA	NA	NA	NA
29379189_139230	29379189	C	Thupl.29379189s0001	Thupl.29379189s0001.1.v3.1	Transcript	3_prime_UTR_variant	2199	NA	NA	NA	NA	NA
29379189_139468	29379189	A	Thupl.29379189s0001	Thupl.29379189s0001.1.v3.1	Transcript	3_prime_UTR_variant	2437	NA	NA	NA	NA	NA
29379193_1493981	29379193	G	Thupl.29379193s0006	Thupl.29379193s0006.1.v3.1	Transcript	3_prime_UTR_variant	2259	NA	NA	NA	NA	NA
29379208_1316167	29379208	T	Thupl.29379208s0008	Thupl.29379208s0008.1.v3.1	Transcript	3_prime_UTR_variant	1205	NA	NA	NA	NA	NA
29379217_603873	29379217	C	Thupl.29379217s0004	Thupl.29379217s0004.1.v3.1	Transcript	3_prime_UTR_variant	1567	NA	NA	NA	NA	NA
29379217_1956816	29379217	C	Thupl.29379217s0014	Thupl.29379217s0014.1.v3.1	Transcript	3_prime_UTR_variant	2230	NA	NA	NA	NA	NA
29379217_1956877	29379217	G	Thupl.29379217s0014	Thupl.29379217s0014.1.v3.1	Transcript	3_prime_UTR_variant	2291	NA	NA	NA	NA	NA
29379217_1956927	29379217	C	Thupl.29379217s0014	Thupl.29379217s0014.1.v3.1	Transcript	3_prime_UTR_variant	2341	NA	NA	NA	NA	NA
29379217_1956967	29379217	T	Thupl.29379217s0014	Thupl.29379217s0014.1.v3.1	Transcript	3_prime_UTR_variant	2381	NA	NA	NA	NA	NA
29379225_509173	29379225	C	Thupl.29379225s0005	Thupl.29379225s0005.1.v3.1	Transcript	3_prime_UTR_variant	3736	NA	NA	NA	NA	NA
29379226_2046893	29379226	T	Thupl.29379226s0005	Thupl.29379226s0005.5.v3.1	Transcript	3_prime_UTR_variant	3233	NA	NA	NA	NA	NA
29379226_2047014	29379226	T	Thupl.29379226s0005	Thupl.29379226s0005.1.v3.1	Transcript	3_prime_UTR_variant	3341	NA	NA	NA	NA	NA
29379226_4227881	29379226	C	Thupl.29379226s0016	Thupl.29379226s0016.1.v3.1	Transcript	3_prime_UTR_variant	3194	NA	NA	NA	NA	NA
29379227_819435	29379227	G	Thupl.29379227s0001	Thupl.29379227s0001.1.v3.1	Transcript	3_prime_UTR_variant	2251	NA	NA	NA	NA	NA
29379232_45788	29379232	C	Thupl.29379232s0001	Thupl.29379232s0001.1.v3.1	Transcript	3_prime_UTR_variant	3276	NA	NA	NA	NA	NA
29379232_45794	29379232	C	Thupl.29379232s0001	Thupl.29379232s0001.1.v3.1	Transcript	3_prime_UTR_variant	3270	NA	NA	NA	NA	NA
29379232_45846	29379232	G	Thupl.29379232s0001	Thupl.29379232s0001.1.v3.1	Transcript	3_prime_UTR_variant	3218	NA	NA	NA	NA	NA
29379238_7216992	29379238	G	Thupl.29379238s0030	Thupl.29379238s0030.1.v3.1	Transcript	3_prime_UTR_variant	2047	NA	NA	NA	NA	NA
29379242_459693	29379242	G	Thupl.29379242s0002	Thupl.29379242s0002.1.v3.1	Transcript	3_prime_UTR_variant	2361	NA	NA	NA	NA	NA
29379242_459770	29379242	G	Thupl.29379242s0002	Thupl.29379242s0002.1.v3.1	Transcript	3_prime_UTR_variant	2438	NA	NA	NA	NA	NA
29379245_1949380	29379245	T	Thupl.29379245s0006	Thupl.29379245s0006.1.v3.1	Transcript	3_prime_UTR_variant	1745	NA	NA	NA	NA	NA
29379254_2170349	29379254	C	Thupl.29379254s0019	Thupl.29379254s0019.1.v3.1	Transcript	3_prime_UTR_variant	4268	NA	NA	NA	NA	NA
29379254_2170353	29379254	A	Thupl.29379254s0019	Thupl.29379254s0019.1.v3.1	Transcript	3_prime_UTR_variant	4264	NA	NA	NA	NA	NA
29379255_157240	29379255	T	Thupl.29379255s0001	Thupl.29379255s0001.1.v3.1	Transcript	3_prime_UTR_variant	3123	NA	NA	NA	NA	NA
29379255_157292	29379255	T	Thupl.29379255s0001	Thupl.29379255s0001.1.v3.1	Transcript	3_prime_UTR_variant	3071	NA	NA	NA	NA	NA
29379255_157363	29379255	C	Thupl.29379255s0001	Thupl.29379255s0001.1.v3.1	Transcript	3_prime_UTR_variant	3000	NA	NA	NA	NA	NA
29379261_82642	29379261	C	Thupl.29379261s0001	Thupl.29379261s0001.1.v3.1	Transcript	3_prime_UTR_variant	1302	NA	NA	NA	NA	NA
29379265_186688	29379265	T	Thupl.29379265s0003	Thupl.29379265s0003.1.v3.1	Transcript	3_prime_UTR_variant	2669	NA	NA	NA	NA	NA
29379265_186689	29379265	G	Thupl.29379265s0003	Thupl.29379265s0003.1.v3.1	Transcript	3_prime_UTR_variant	2668	NA	NA	NA	NA	NA
29379270_6432078	29379270	A	Thupl.29379270s0022	Thupl.29379270s0022.1.v3.1	Transcript	3_prime_UTR_variant	602	NA	NA	NA	NA	NA
29379270_6432128	29379270	T	Thupl.29379270s0022	Thupl.29379270s0022.1.v3.1	Transcript	3_prime_UTR_variant	552	NA	NA	NA	NA	NA
29379271_359369	29379271	G	Thupl.29379271s0005	Thupl.29379271s0005.1.v3.1	Transcript	3_prime_UTR_variant	893	NA	NA	NA	NA	NA
29379272_687141	29379272	C	Thupl.29379272s0002	Thupl.29379272s0002.1.v3.1	Transcript	3_prime_UTR_variant	2491	NA	NA	NA	NA	NA
29379272_1018934	29379272	C	Thupl.29379272s0003	Thupl.29379272s0003.1.v3.1	Transcript	3_prime_UTR_variant	2425	NA	NA	NA	NA	NA
29379279_1491305	29379279	G	Thupl.29379279s0005	Thupl.29379279s0005.1.v3.1	Transcript	3_prime_UTR_variant	1469	NA	NA	NA	NA	NA
29379279_1491344	29379279	G	Thupl.29379279s0005	Thupl.29379279s0005.1.v3.1	Transcript	3_prime_UTR_variant	1430	NA	NA	NA	NA	NA
29379279_1491345	29379279	G	Thupl.29379279s0005	Thupl.29379279s0005.1.v3.1	Transcript	3_prime_UTR_variant	1429	NA	NA	NA	NA	NA
29379279_1491418	29379279	C	Thupl.29379279s0005	Thupl.29379279s0005.1.v3.1	Transcript	3_prime_UTR_variant	1356	NA	NA	NA	NA	NA
29379279_1491423	29379279	A	Thupl.29379279s0005	Thupl.29379279s0005.1.v3.1	Transcript	3_prime_UTR_variant	1351	NA	NA	NA	NA	NA
29379280_660247	29379280	A	Thupl.29379280s0004	Thupl.29379280s0004.1.v3.1	Transcript	3_prime_UTR_variant	850	NA	NA	NA	NA	NA
29379287_114856	29379287	G	Thupl.29379287s0001	Thupl.29379287s0001.1.v3.1	Transcript	3_prime_UTR_variant	3212	NA	NA	NA	NA	NA
29379287_114870	29379287	T	Thupl.29379287s0001	Thupl.29379287s0001.1.v3.1	Transcript	3_prime_UTR_variant	3198	NA	NA	NA	NA	NA
29379287_255419	29379287	G	Thupl.29379287s0002	Thupl.29379287s0002.1.v3.1	Transcript	3_prime_UTR_variant	1103	NA	NA	NA	NA	NA
29379304_1680362	29379304	C	Thupl.29379304s0003	Thupl.29379304s0003.1.v3.1	Transcript	3_prime_UTR_variant	1761	NA	NA	NA	NA	NA
29379304_3659428	29379304	A	Thupl.29379304s0010	Thupl.29379304s0010.1.v3.1	Transcript	3_prime_UTR_variant	1213	NA	NA	NA	NA	NA
29379304_3659539	29379304	G	Thupl.29379304s0010	Thupl.29379304s0010.1.v3.1	Transcript	3_prime_UTR_variant	1324	NA	NA	NA	NA	NA
29379306_523468	29379306	C	Thupl.29379306s0004	Thupl.29379306s0004.1.v3.1	Transcript	3_prime_UTR_variant	2620	NA	NA	NA	NA	NA
29379314_2371524	29379314	C	Thupl.29379314s0007	Thupl.29379314s0007.1.v3.1	Transcript	3_prime_UTR_variant	1107	NA	NA	NA	NA	NA
29379314_2371625	29379314	C	Thupl.29379314s0007	Thupl.29379314s0007.1.v3.1	Transcript	3_prime_UTR_variant	1208	NA	NA	NA	NA	NA
29379326_78036	29379326	C	Thupl.29379326s0001	Thupl.29379326s0001.2.v3.1	Transcript	3_prime_UTR_variant	788	NA	NA	NA	NA	NA
29379326_78094	29379326	A	Thupl.29379326s0001	Thupl.29379326s0001.2.v3.1	Transcript	3_prime_UTR_variant	846	NA	NA	NA	NA	NA
29379337_3177822	29379337	C	Thupl.29379337s0019	Thupl.29379337s0019.1.v3.1	Transcript	3_prime_UTR_variant	2887	NA	NA	NA	NA	NA
29379337_3939905	29379337	C	Thupl.29379337s0021	Thupl.29379337s0021.1.v3.1	Transcript	3_prime_UTR_variant	1036	NA	NA	NA	NA	NA
29379339_4579963	29379339	A	Thupl.29379339s0024	Thupl.29379339s0024.1.v3.1	Transcript	3_prime_UTR_variant	1283	NA	NA	NA	NA	NA
29379339_4713483	29379339	C	Thupl.29379339s0025	Thupl.29379339s0025.1.v3.1	Transcript	3_prime_UTR_variant	1498	NA	NA	NA	NA	NA
29379343_748270	29379343	A	Thupl.29379343s0015	Thupl.29379343s0015.1.v3.1	Transcript	3_prime_UTR_variant	3294	NA	NA	NA	NA	NA
29379343_748356	29379343	A	Thupl.29379343s0015	Thupl.29379343s0015.1.v3.1	Transcript	3_prime_UTR_variant	3208	NA	NA	NA	NA	NA
29379343_748405	29379343	G	Thupl.29379343s0015	Thupl.29379343s0015.1.v3.1	Transcript	3_prime_UTR_variant	3159	NA	NA	NA	NA	NA
29379349_322350	29379349	C	Thupl.29379349s0003	Thupl.29379349s0003.1.v3.1	Transcript	3_prime_UTR_variant	1583	NA	NA	NA	NA	NA
29379352_1657600	29379352	T	Thupl.29379352s0010	Thupl.29379352s0010.1.v3.1	Transcript	3_prime_UTR_variant	1056	NA	NA	NA	NA	NA
29379354_986741	29379354	C	Thupl.29379354s0005	Thupl.29379354s0005.1.v3.1	Transcript	3_prime_UTR_variant	697	NA	NA	NA	NA	NA
29379354_986789	29379354	G	Thupl.29379354s0005	Thupl.29379354s0005.1.v3.1	Transcript	3_prime_UTR_variant	649	NA	NA	NA	NA	NA
29379355_449795	29379355	T	Thupl.29379355s0003	Thupl.29379355s0003.1.v3.1	Transcript	3_prime_UTR_variant	2733	NA	NA	NA	NA	NA
29379356_3637425	29379356	A	Thupl.29379356s0013	Thupl.29379356s0013.1.v3.1	Transcript	3_prime_UTR_variant	986	NA	NA	NA	NA	NA
29379356_3637426	29379356	C	Thupl.29379356s0013	Thupl.29379356s0013.1.v3.1	Transcript	3_prime_UTR_variant	985	NA	NA	NA	NA	NA
29379370_1684022	29379370	C	Thupl.29379370s0012	Thupl.29379370s0012.1.v3.1	Transcript	3_prime_UTR_variant	857	NA	NA	NA	NA	NA
29379370_1684076	29379370	G	Thupl.29379370s0012	Thupl.29379370s0012.1.v3.1	Transcript	3_prime_UTR_variant	803	NA	NA	NA	NA	NA
29379372_313569	29379372	T	Thupl.29379372s0004	Thupl.29379372s0004.1.v3.1	Transcript	3_prime_UTR_variant	3286	NA	NA	NA	NA	NA
29379372_313632	29379372	A	Thupl.29379372s0004	Thupl.29379372s0004.1.v3.1	Transcript	3_prime_UTR_variant	3349	NA	NA	NA	NA	NA
29379382_719570	29379382	C	Thupl.29379382s0002	Thupl.29379382s0002.1.v3.1	Transcript	3_prime_UTR_variant	2964	NA	NA	NA	NA	NA
29379382_1468163	29379382	T	Thupl.29379382s0008	Thupl.29379382s0008.1.v3.1	Transcript	3_prime_UTR_variant	1510	NA	NA	NA	NA	NA
29379382_1764158	29379382	T	Thupl.29379382s0010	Thupl.29379382s0010.1.v3.1	Transcript	3_prime_UTR_variant	2137	NA	NA	NA	NA	NA
29379382_1764188	29379382	T	Thupl.29379382s0010	Thupl.29379382s0010.1.v3.1	Transcript	3_prime_UTR_variant	2167	NA	NA	NA	NA	NA
29379386_630771	29379386	T	Thupl.29379386s0005	Thupl.29379386s0005.1.v3.1	Transcript	3_prime_UTR_variant	1877	NA	NA	NA	NA	NA
29379386_982339	29379386	A	Thupl.29379386s0007	Thupl.29379386s0007.1.v3.1	Transcript	3_prime_UTR_variant	2686	NA	NA	NA	NA	NA
29379386_982592	29379386	A	Thupl.29379386s0007	Thupl.29379386s0007.1.v3.1	Transcript	3_prime_UTR_variant	2433	NA	NA	NA	NA	NA
29379388_477085	29379388	C	Thupl.29379388s0004	Thupl.29379388s0004.1.v3.1	Transcript	3_prime_UTR_variant	1072	NA	NA	NA	NA	NA
29379390_2813695	29379390	C	Thupl.29379390s0011	Thupl.29379390s0011.1.v3.1	Transcript	3_prime_UTR_variant	2358	NA	NA	NA	NA	NA
29379392_1002299	29379392	G	Thupl.29379392s0002	Thupl.29379392s0002.1.v3.1	Transcript	3_prime_UTR_variant	2884	NA	NA	NA	NA	NA
29379392_1002307	29379392	A	Thupl.29379392s0002	Thupl.29379392s0002.1.v3.1	Transcript	3_prime_UTR_variant	2892	NA	NA	NA	NA	NA
29379392_1002313	29379392	G	Thupl.29379392s0002	Thupl.29379392s0002.1.v3.1	Transcript	3_prime_UTR_variant	2898	NA	NA	NA	NA	NA
29379392_1740242	29379392	T	Thupl.29379392s0004	Thupl.29379392s0004.1.v3.1	Transcript	3_prime_UTR_variant	1291	NA	NA	NA	NA	NA
29379400_1809747	29379400	G	Thupl.29379400s0011	Thupl.29379400s0011.1.v3.1	Transcript	3_prime_UTR_variant	1822	NA	NA	NA	NA	NA
29379401_53813	29379401	G	Thupl.29379401s0001	Thupl.29379401s0001.1.v3.1	Transcript	3_prime_UTR_variant	1127	NA	NA	NA	NA	NA
29379401_53881	29379401	C	Thupl.29379401s0001	Thupl.29379401s0001.1.v3.1	Transcript	3_prime_UTR_variant	1059	NA	NA	NA	NA	NA
29379401_53911	29379401	G	Thupl.29379401s0001	Thupl.29379401s0001.1.v3.1	Transcript	3_prime_UTR_variant	1029	NA	NA	NA	NA	NA
29379401_53949	29379401	T	Thupl.29379401s0001	Thupl.29379401s0001.1.v3.1	Transcript	3_prime_UTR_variant	991	NA	NA	NA	NA	NA
29379401_54109	29379401	A	Thupl.29379401s0001	Thupl.29379401s0001.1.v3.1	Transcript	3_prime_UTR_variant	831	NA	NA	NA	NA	NA
29379401_54126	29379401	G	Thupl.29379401s0001	Thupl.29379401s0001.1.v3.1	Transcript	3_prime_UTR_variant	814	NA	NA	NA	NA	NA
29379401_54137	29379401	T	Thupl.29379401s0001	Thupl.29379401s0001.1.v3.1	Transcript	3_prime_UTR_variant	803	NA	NA	NA	NA	NA
29379401_475714	29379401	A	Thupl.29379401s0002	Thupl.29379401s0002.1.v3.1	Transcript	3_prime_UTR_variant	607	NA	NA	NA	NA	NA
29379401_475772	29379401	T	Thupl.29379401s0002	Thupl.29379401s0002.1.v3.1	Transcript	3_prime_UTR_variant	665	NA	NA	NA	NA	NA
29379401_475773	29379401	T	Thupl.29379401s0002	Thupl.29379401s0002.1.v3.1	Transcript	3_prime_UTR_variant	666	NA	NA	NA	NA	NA
29379402_1476316	29379402	T	Thupl.29379402s0006	Thupl.29379402s0006.1.v3.1	Transcript	3_prime_UTR_variant	2845	NA	NA	NA	NA	NA
29379402_1476368	29379402	A	Thupl.29379402s0006	Thupl.29379402s0006.1.v3.1	Transcript	3_prime_UTR_variant	2897	NA	NA	NA	NA	NA
29379402_1476612	29379402	A	Thupl.29379402s0006	Thupl.29379402s0006.1.v3.1	Transcript	3_prime_UTR_variant	3141	NA	NA	NA	NA	NA
29379402_1476676	29379402	A	Thupl.29379402s0006	Thupl.29379402s0006.1.v3.1	Transcript	3_prime_UTR_variant	3205	NA	NA	NA	NA	NA
29379402_1476698	29379402	A	Thupl.29379402s0006	Thupl.29379402s0006.1.v3.1	Transcript	3_prime_UTR_variant	3227	NA	NA	NA	NA	NA
29379402_1476713	29379402	C	Thupl.29379402s0006	Thupl.29379402s0006.1.v3.1	Transcript	3_prime_UTR_variant	3242	NA	NA	NA	NA	NA
29379402_1991269	29379402	C	Thupl.29379402s0008	Thupl.29379402s0008.1.v3.1	Transcript	3_prime_UTR_variant	2802	NA	NA	NA	NA	NA
29379404_674832	29379404	G	Thupl.29379404s0010	Thupl.29379404s0010.2.v3.1	Transcript	3_prime_UTR_variant	1050	NA	NA	NA	NA	NA
29379404_1376835	29379404	G	Thupl.29379404s0012	Thupl.29379404s0012.1.v3.1	Transcript	3_prime_UTR_variant	1898	NA	NA	NA	NA	NA
29379404_1376890	29379404	A	Thupl.29379404s0012	Thupl.29379404s0012.1.v3.1	Transcript	3_prime_UTR_variant	1953	NA	NA	NA	NA	NA
29379409_1504908	29379409	G	Thupl.29379409s0009	Thupl.29379409s0009.1.v3.1	Transcript	3_prime_UTR_variant	4065	NA	NA	NA	NA	NA
29379409_1907308	29379409	G	Thupl.29379409s0012	Thupl.29379409s0012.1.v3.1	Transcript	3_prime_UTR_variant	931	NA	NA	NA	NA	NA
29379409_2570362	29379409	T	Thupl.29379409s0014	Thupl.29379409s0014.1.v3.1	Transcript	3_prime_UTR_variant	8782	NA	NA	NA	NA	NA
29379409_2570377	29379409	G	Thupl.29379409s0014	Thupl.29379409s0014.1.v3.1	Transcript	3_prime_UTR_variant	8797	NA	NA	NA	NA	NA
29379416_2299964	29379416	T	Thupl.29379416s0009	Thupl.29379416s0009.1.v3.1	Transcript	3_prime_UTR_variant	1317	NA	NA	NA	NA	NA
29379418_1261040	29379418	C	Thupl.29379418s0006	Thupl.29379418s0006.1.v3.1	Transcript	3_prime_UTR_variant	701	NA	NA	NA	NA	NA
29379418_1261124	29379418	G	Thupl.29379418s0006	Thupl.29379418s0006.1.v3.1	Transcript	3_prime_UTR_variant	617	NA	NA	NA	NA	NA
29379424_108989	29379424	G	Thupl.29379424s0001	Thupl.29379424s0001.1.v3.1	Transcript	3_prime_UTR_variant	1320	NA	NA	NA	NA	NA
29379424_483318	29379424	T	Thupl.29379424s0003	Thupl.29379424s0003.1.v3.1	Transcript	3_prime_UTR_variant	1321	NA	NA	NA	NA	NA
29379424_483358	29379424	C	Thupl.29379424s0003	Thupl.29379424s0003.1.v3.1	Transcript	3_prime_UTR_variant	1361	NA	NA	NA	NA	NA
29379424_483372	29379424	T	Thupl.29379424s0003	Thupl.29379424s0003.2.v3.1	Transcript	3_prime_UTR_variant	1169	NA	NA	NA	NA	NA
29379424_2681285	29379424	A	Thupl.29379424s0019	Thupl.29379424s0019.1.v3.1	Transcript	3_prime_UTR_variant	4350	NA	NA	NA	NA	NA
29379424_2681473	29379424	C	Thupl.29379424s0019	Thupl.29379424s0019.1.v3.1	Transcript	3_prime_UTR_variant	4538	NA	NA	NA	NA	NA
29379424_2962951	29379424	C	Thupl.29379424s0021	Thupl.29379424s0021.1.v3.1	Transcript	3_prime_UTR_variant	2495	NA	NA	NA	NA	NA
29379424_2963023	29379424	T	Thupl.29379424s0021	Thupl.29379424s0021.1.v3.1	Transcript	3_prime_UTR_variant	2423	NA	NA	NA	NA	NA
29379424_2963050	29379424	A	Thupl.29379424s0021	Thupl.29379424s0021.1.v3.1	Transcript	3_prime_UTR_variant	2396	NA	NA	NA	NA	NA
29379424_2963088	29379424	C	Thupl.29379424s0021	Thupl.29379424s0021.1.v3.1	Transcript	3_prime_UTR_variant	2358	NA	NA	NA	NA	NA
29379428_1677397	29379428	G	Thupl.29379428s0012	Thupl.29379428s0012.1.v3.1	Transcript	3_prime_UTR_variant	975	NA	NA	NA	NA	NA
29379430_96180	29379430	A	Thupl.29379430s0002	Thupl.29379430s0002.1.v3.1	Transcript	3_prime_UTR_variant	1214	NA	NA	NA	NA	NA
29379430_96203	29379430	C	Thupl.29379430s0002	Thupl.29379430s0002.1.v3.1	Transcript	3_prime_UTR_variant	1191	NA	NA	NA	NA	NA
29379430_96258	29379430	C	Thupl.29379430s0002	Thupl.29379430s0002.1.v3.1	Transcript	3_prime_UTR_variant	1136	NA	NA	NA	NA	NA
29379430_96373	29379430	T	Thupl.29379430s0002	Thupl.29379430s0002.1.v3.1	Transcript	3_prime_UTR_variant	1021	NA	NA	NA	NA	NA
29379430_1174824	29379430	C	Thupl.29379430s0006	Thupl.29379430s0006.1.v3.1	Transcript	3_prime_UTR_variant	1799	NA	NA	NA	NA	NA
29379430_1174978	29379430	T	Thupl.29379430s0006	Thupl.29379430s0006.1.v3.1	Transcript	3_prime_UTR_variant	1953	NA	NA	NA	NA	NA
29379434_100519	29379434	A	Thupl.29379434s0001	Thupl.29379434s0001.1.v3.1	Transcript	3_prime_UTR_variant	2124	NA	NA	NA	NA	NA
29379439_261666	29379439	T	Thupl.29379439s0004	Thupl.29379439s0004.1.v3.1	Transcript	3_prime_UTR_variant	775	NA	NA	NA	NA	NA
29379439_261843	29379439	T	Thupl.29379439s0004	Thupl.29379439s0004.1.v3.1	Transcript	3_prime_UTR_variant	952	NA	NA	NA	NA	NA
29379439_261857	29379439	C	Thupl.29379439s0004	Thupl.29379439s0004.1.v3.1	Transcript	3_prime_UTR_variant	966	NA	NA	NA	NA	NA
29379440_2923498	29379440	G	Thupl.29379440s0009	Thupl.29379440s0009.1.v3.1	Transcript	3_prime_UTR_variant	2390	NA	NA	NA	NA	NA
29379440_2923523	29379440	T	Thupl.29379440s0009	Thupl.29379440s0009.1.v3.1	Transcript	3_prime_UTR_variant	2415	NA	NA	NA	NA	NA
29379440_4919887	29379440	C	Thupl.29379440s0014	Thupl.29379440s0014.1.v3.1	Transcript	3_prime_UTR_variant	2784	NA	NA	NA	NA	NA
29379440_4919965	29379440	G	Thupl.29379440s0014	Thupl.29379440s0014.1.v3.1	Transcript	3_prime_UTR_variant	2862	NA	NA	NA	NA	NA
29379454_1156036	29379454	A	Thupl.29379454s0004	Thupl.29379454s0004.1.v3.1	Transcript	3_prime_UTR_variant	1932	NA	NA	NA	NA	NA
29379454_3774363	29379454	C	Thupl.29379454s0014	Thupl.29379454s0014.2.v3.1	Transcript	3_prime_UTR_variant	4266	NA	NA	NA	NA	NA
29379454_3774797	29379454	T	Thupl.29379454s0014	Thupl.29379454s0014.2.v3.1	Transcript	3_prime_UTR_variant	3832	NA	NA	NA	NA	NA
29379462_525512	29379462	T	Thupl.29379462s0001	Thupl.29379462s0001.1.v3.1	Transcript	3_prime_UTR_variant	1635	NA	NA	NA	NA	NA
29379470_2722252	29379470	G	Thupl.29379470s0023	Thupl.29379470s0023.1.v3.1	Transcript	3_prime_UTR_variant	3037	NA	NA	NA	NA	NA
29379470_3027619	29379470	G	Thupl.29379470s0024	Thupl.29379470s0024.1.v3.1	Transcript	3_prime_UTR_variant	1469	NA	NA	NA	NA	NA
29379473_623722	29379473	C	Thupl.29379473s0001	Thupl.29379473s0001.1.v3.1	Transcript	3_prime_UTR_variant	875	NA	NA	NA	NA	NA
29379477_1055947	29379477	C	Thupl.29379477s0002	Thupl.29379477s0002.1.v3.1	Transcript	3_prime_UTR_variant	2265	NA	NA	NA	NA	NA
29379479_327753	29379479	C	Thupl.29379479s0003	Thupl.29379479s0003.1.v3.1	Transcript	3_prime_UTR_variant	1438	NA	NA	NA	NA	NA
29379479_849386	29379479	C	Thupl.29379479s0005	Thupl.29379479s0005.1.v3.1	Transcript	3_prime_UTR_variant	1894	NA	NA	NA	NA	NA
29379479_849433	29379479	A	Thupl.29379479s0005	Thupl.29379479s0005.1.v3.1	Transcript	3_prime_UTR_variant	1847	NA	NA	NA	NA	NA
29379482_3022719	29379482	C	Thupl.29379482s0016	Thupl.29379482s0016.1.v3.1	Transcript	3_prime_UTR_variant	1267	NA	NA	NA	NA	NA
29379482_5496174	29379482	G	Thupl.29379482s0038	Thupl.29379482s0038.1.v3.1	Transcript	3_prime_UTR_variant	2561	NA	NA	NA	NA	NA
29379482_6216733	29379482	G	Thupl.29379482s0043	Thupl.29379482s0043.1.v3.1	Transcript	3_prime_UTR_variant	2204	NA	NA	NA	NA	NA
29379482_6217002	29379482	G	Thupl.29379482s0043	Thupl.29379482s0043.1.v3.1	Transcript	3_prime_UTR_variant	2473	NA	NA	NA	NA	NA
29379488_1782856	29379488	A	Thupl.29379488s0007	Thupl.29379488s0007.1.v3.1	Transcript	3_prime_UTR_variant	2023	NA	NA	NA	NA	NA
29379488_1782917	29379488	A	Thupl.29379488s0007	Thupl.29379488s0007.1.v3.1	Transcript	3_prime_UTR_variant	1962	NA	NA	NA	NA	NA
29379488_1782930	29379488	A	Thupl.29379488s0007	Thupl.29379488s0007.1.v3.1	Transcript	3_prime_UTR_variant	1949	NA	NA	NA	NA	NA
29379488_1782953	29379488	G	Thupl.29379488s0007	Thupl.29379488s0007.1.v3.1	Transcript	3_prime_UTR_variant	1926	NA	NA	NA	NA	NA
29379488_1782964	29379488	T	Thupl.29379488s0007	Thupl.29379488s0007.1.v3.1	Transcript	3_prime_UTR_variant	1915	NA	NA	NA	NA	NA
29379495_1766206	29379495	C	Thupl.29379495s0004	Thupl.29379495s0004.1.v3.1	Transcript	3_prime_UTR_variant	5736	NA	NA	NA	NA	NA
29379495_2554106	29379495	T	Thupl.29379495s0006	Thupl.29379495s0006.1.v3.1	Transcript	3_prime_UTR_variant	1150	NA	NA	NA	NA	NA
29379495_2554120	29379495	G	Thupl.29379495s0006	Thupl.29379495s0006.1.v3.1	Transcript	3_prime_UTR_variant	1164	NA	NA	NA	NA	NA
29379495_3011803	29379495	A	Thupl.29379495s0007	Thupl.29379495s0007.1.v3.1	Transcript	3_prime_UTR_variant	1954	NA	NA	NA	NA	NA
29379495_3011863	29379495	A	Thupl.29379495s0007	Thupl.29379495s0007.1.v3.1	Transcript	3_prime_UTR_variant	2014	NA	NA	NA	NA	NA
29379495_3011917	29379495	A	Thupl.29379495s0007	Thupl.29379495s0007.1.v3.1	Transcript	3_prime_UTR_variant	2068	NA	NA	NA	NA	NA
29379498_4797110	29379498	A	Thupl.29379498s0028	Thupl.29379498s0028.1.v3.1	Transcript	3_prime_UTR_variant	2426	NA	NA	NA	NA	NA
29379498_5717779	29379498	A	Thupl.29379498s0032	Thupl.29379498s0032.1.v3.1	Transcript	3_prime_UTR_variant	3515	NA	NA	NA	NA	NA
29379498_5718319	29379498	C	Thupl.29379498s0032	Thupl.29379498s0032.1.v3.1	Transcript	3_prime_UTR_variant	2975	NA	NA	NA	NA	NA
29379498_5718356	29379498	A	Thupl.29379498s0032	Thupl.29379498s0032.1.v3.1	Transcript	3_prime_UTR_variant	2938	NA	NA	NA	NA	NA
29379513_1612600	29379513	G	Thupl.29379513s0006	Thupl.29379513s0006.1.v3.1	Transcript	3_prime_UTR_variant	1635	NA	NA	NA	NA	NA
29379515_232170	29379515	C	Thupl.29379515s0001	Thupl.29379515s0001.1.v3.1	Transcript	3_prime_UTR_variant	1787	NA	NA	NA	NA	NA
29379521_1437496	29379521	G	Thupl.29379521s0007	Thupl.29379521s0007.1.v3.1	Transcript	3_prime_UTR_variant	746	NA	NA	NA	NA	NA
29379523_789764	29379523	T	Thupl.29379523s0001	Thupl.29379523s0001.1.v3.1	Transcript	3_prime_UTR_variant	1660	NA	NA	NA	NA	NA
29379523_790474	29379523	T	Thupl.29379523s0001	Thupl.29379523s0001.1.v3.1	Transcript	3_prime_UTR_variant	950	NA	NA	NA	NA	NA
29379523_790530	29379523	T	Thupl.29379523s0001	Thupl.29379523s0001.1.v3.1	Transcript	3_prime_UTR_variant	894	NA	NA	NA	NA	NA
29379524_3385847	29379524	G	Thupl.29379524s0013	Thupl.29379524s0013.1.v3.1	Transcript	3_prime_UTR_variant	1317	NA	NA	NA	NA	NA
29379534_709639	29379534	C	Thupl.29379534s0004	Thupl.29379534s0004.1.v3.1	Transcript	3_prime_UTR_variant	3500	NA	NA	NA	NA	NA
29379534_1465805	29379534	C	Thupl.29379534s0007	Thupl.29379534s0007.1.v3.1	Transcript	3_prime_UTR_variant	3137	NA	NA	NA	NA	NA
29379536_243622	29379536	A	Thupl.29379536s0001	Thupl.29379536s0001.1.v3.1	Transcript	3_prime_UTR_variant	770	NA	NA	NA	NA	NA
29379536_243661	29379536	G	Thupl.29379536s0001	Thupl.29379536s0001.1.v3.1	Transcript	3_prime_UTR_variant	809	NA	NA	NA	NA	NA
29379536_243694	29379536	G	Thupl.29379536s0001	Thupl.29379536s0001.1.v3.1	Transcript	3_prime_UTR_variant	842	NA	NA	NA	NA	NA
29379551_5606710	29379551	T	Thupl.29379551s0019	Thupl.29379551s0019.1.v3.1	Transcript	3_prime_UTR_variant	1052	NA	NA	NA	NA	NA
29379567_1776085	29379567	C	Thupl.29379567s0011	Thupl.29379567s0011.1.v3.1	Transcript	3_prime_UTR_variant	2724	NA	NA	NA	NA	NA
29379586_602839	29379586	T	Thupl.29379586s0004	Thupl.29379586s0004.1.v3.1	Transcript	3_prime_UTR_variant	1539	NA	NA	NA	NA	NA
29379586_603077	29379586	A	Thupl.29379586s0004	Thupl.29379586s0004.1.v3.1	Transcript	3_prime_UTR_variant	1777	NA	NA	NA	NA	NA
29379587_744618	29379587	A	Thupl.29379587s0004	Thupl.29379587s0004.1.v3.1	Transcript	3_prime_UTR_variant	2773	NA	NA	NA	NA	NA
29379587_3516973	29379587	A	Thupl.29379587s0010	Thupl.29379587s0010.1.v3.1	Transcript	3_prime_UTR_variant	4987	NA	NA	NA	NA	NA
29379588_443614	29379588	T	Thupl.29379588s0001	Thupl.29379588s0001.1.v3.1	Transcript	3_prime_UTR_variant	4608	NA	NA	NA	NA	NA
29379588_443931	29379588	A	Thupl.29379588s0001	Thupl.29379588s0001.1.v3.1	Transcript	3_prime_UTR_variant	4291	NA	NA	NA	NA	NA
29379588_444038	29379588	A	Thupl.29379588s0001	Thupl.29379588s0001.1.v3.1	Transcript	3_prime_UTR_variant	4184	NA	NA	NA	NA	NA
29379588_444051	29379588	T	Thupl.29379588s0001	Thupl.29379588s0001.1.v3.1	Transcript	3_prime_UTR_variant	4171	NA	NA	NA	NA	NA
29379588_444065	29379588	C	Thupl.29379588s0001	Thupl.29379588s0001.1.v3.1	Transcript	3_prime_UTR_variant	4157	NA	NA	NA	NA	NA
29379588_444243	29379588	C	Thupl.29379588s0001	Thupl.29379588s0001.1.v3.1	Transcript	3_prime_UTR_variant	3979	NA	NA	NA	NA	NA
29379588_905216	29379588	C	Thupl.29379588s0002	Thupl.29379588s0002.1.v3.1	Transcript	3_prime_UTR_variant	632	NA	NA	NA	NA	NA
29379588_905235	29379588	A	Thupl.29379588s0002	Thupl.29379588s0002.1.v3.1	Transcript	3_prime_UTR_variant	613	NA	NA	NA	NA	NA
29379588_905236	29379588	C	Thupl.29379588s0002	Thupl.29379588s0002.1.v3.1	Transcript	3_prime_UTR_variant	612	NA	NA	NA	NA	NA
29379588_905259	29379588	C	Thupl.29379588s0002	Thupl.29379588s0002.1.v3.1	Transcript	3_prime_UTR_variant	589	NA	NA	NA	NA	NA
29379588_905269	29379588	G	Thupl.29379588s0002	Thupl.29379588s0002.1.v3.1	Transcript	3_prime_UTR_variant	579	NA	NA	NA	NA	NA
29379588_905279	29379588	A	Thupl.29379588s0002	Thupl.29379588s0002.1.v3.1	Transcript	3_prime_UTR_variant	569	NA	NA	NA	NA	NA
29379589_109413	29379589	C	Thupl.29379589s0001	Thupl.29379589s0001.1.v3.1	Transcript	3_prime_UTR_variant	1570	NA	NA	NA	NA	NA
29379589_109428	29379589	A	Thupl.29379589s0001	Thupl.29379589s0001.1.v3.1	Transcript	3_prime_UTR_variant	1555	NA	NA	NA	NA	NA
29379591_720819	29379591	T	Thupl.29379591s0005	Thupl.29379591s0005.1.v3.1	Transcript	3_prime_UTR_variant	1242	NA	NA	NA	NA	NA
29379598_69970	29379598	C	Thupl.29379598s0001	Thupl.29379598s0001.1.v3.1	Transcript	3_prime_UTR_variant	1670	NA	NA	NA	NA	NA
29379608_1677862	29379608	G	Thupl.29379608s0010	Thupl.29379608s0010.1.v3.1	Transcript	3_prime_UTR_variant	682	NA	NA	NA	NA	NA
29379608_2124874	29379608	A	Thupl.29379608s0011	Thupl.29379608s0011.1.v3.1	Transcript	3_prime_UTR_variant	2316	NA	NA	NA	NA	NA
29379608_2124976	29379608	G	Thupl.29379608s0011	Thupl.29379608s0011.1.v3.1	Transcript	3_prime_UTR_variant	2418	NA	NA	NA	NA	NA
29379612_1063431	29379612	C	Thupl.29379612s0005	Thupl.29379612s0005.1.v3.1	Transcript	3_prime_UTR_variant	1234	NA	NA	NA	NA	NA
29379612_1063436	29379612	G	Thupl.29379612s0005	Thupl.29379612s0005.1.v3.1	Transcript	3_prime_UTR_variant	1229	NA	NA	NA	NA	NA
29379612_1063652	29379612	T	Thupl.29379612s0005	Thupl.29379612s0005.1.v3.1	Transcript	3_prime_UTR_variant	1013	NA	NA	NA	NA	NA
29379627_2241013	29379627	T	Thupl.29379627s0004	Thupl.29379627s0004.1.v3.1	Transcript	3_prime_UTR_variant	813	NA	NA	NA	NA	NA
29379627_3255866	29379627	G	Thupl.29379627s0010	Thupl.29379627s0010.1.v3.1	Transcript	3_prime_UTR_variant	709	NA	NA	NA	NA	NA
29379627_3256031	29379627	C	Thupl.29379627s0010	Thupl.29379627s0010.1.v3.1	Transcript	3_prime_UTR_variant	874	NA	NA	NA	NA	NA
29379627_3256035	29379627	T	Thupl.29379627s0010	Thupl.29379627s0010.1.v3.1	Transcript	3_prime_UTR_variant	878	NA	NA	NA	NA	NA
29379627_3256050	29379627	C	Thupl.29379627s0010	Thupl.29379627s0010.1.v3.1	Transcript	3_prime_UTR_variant	893	NA	NA	NA	NA	NA
29379627_3256091	29379627	T	Thupl.29379627s0010	Thupl.29379627s0010.1.v3.1	Transcript	3_prime_UTR_variant	934	NA	NA	NA	NA	NA
29379628_1339940	29379628	T	Thupl.29379628s0008	Thupl.29379628s0008.1.v3.1	Transcript	3_prime_UTR_variant	1518	NA	NA	NA	NA	NA
29379630_7066491	29379630	T	Thupl.29379630s0034	Thupl.29379630s0034.1.v3.1	Transcript	3_prime_UTR_variant	713	NA	NA	NA	NA	NA
29379637_1148286	29379637	T	Thupl.29379637s0012	Thupl.29379637s0012.1.v3.1	Transcript	3_prime_UTR_variant	3419	NA	NA	NA	NA	NA
29379637_1148314	29379637	G	Thupl.29379637s0012	Thupl.29379637s0012.1.v3.1	Transcript	3_prime_UTR_variant	3391	NA	NA	NA	NA	NA
29379637_1148316	29379637	G	Thupl.29379637s0012	Thupl.29379637s0012.1.v3.1	Transcript	3_prime_UTR_variant	3389	NA	NA	NA	NA	NA
29379637_1148323	29379637	A	Thupl.29379637s0012	Thupl.29379637s0012.1.v3.1	Transcript	3_prime_UTR_variant	3382	NA	NA	NA	NA	NA
29379644_684448	29379644	A	Thupl.29379644s0003	Thupl.29379644s0003.1.v3.1	Transcript	3_prime_UTR_variant	509	NA	NA	NA	NA	NA
29379661_1567650	29379661	G	Thupl.29379661s0007	Thupl.29379661s0007.1.v3.1	Transcript	3_prime_UTR_variant	6593	NA	NA	NA	NA	NA
29379661_1567671	29379661	A	Thupl.29379661s0007	Thupl.29379661s0007.1.v3.1	Transcript	3_prime_UTR_variant	6614	NA	NA	NA	NA	NA
29379665_5543908	29379665	C	Thupl.29379665s0020	Thupl.29379665s0020.1.v3.1	Transcript	3_prime_UTR_variant	1540	NA	NA	NA	NA	NA
29379665_6748459	29379665	G	Thupl.29379665s0033	Thupl.29379665s0033.1.v3.1	Transcript	3_prime_UTR_variant	2024	NA	NA	NA	NA	NA
29379665_8867042	29379665	G	Thupl.29379665s0044	Thupl.29379665s0044.1.v3.1	Transcript	3_prime_UTR_variant	1352	NA	NA	NA	NA	NA
29379668_415470	29379668	G	Thupl.29379668s0008	Thupl.29379668s0008.1.v3.1	Transcript	3_prime_UTR_variant	1144	NA	NA	NA	NA	NA
29379668_1402952	29379668	A	Thupl.29379668s0011	Thupl.29379668s0011.1.v3.1	Transcript	3_prime_UTR_variant	1879	NA	NA	NA	NA	NA
29379668_1542433	29379668	A	Thupl.29379668s0012	Thupl.29379668s0012.1.v3.1	Transcript	3_prime_UTR_variant	641	NA	NA	NA	NA	NA
29379668_1542485	29379668	T	Thupl.29379668s0012	Thupl.29379668s0012.1.v3.1	Transcript	3_prime_UTR_variant	589	NA	NA	NA	NA	NA
29379668_1542495	29379668	A	Thupl.29379668s0012	Thupl.29379668s0012.1.v3.1	Transcript	3_prime_UTR_variant	579	NA	NA	NA	NA	NA
29379669_1660123	29379669	A	Thupl.29379669s0007	Thupl.29379669s0007.1.v3.1	Transcript	3_prime_UTR_variant	1495	NA	NA	NA	NA	NA
29379681_2215386	29379681	T	Thupl.29379681s0005	Thupl.29379681s0005.1.v3.1	Transcript	3_prime_UTR_variant	1111	NA	NA	NA	NA	NA
29379687_950930	29379687	G	Thupl.29379687s0004	Thupl.29379687s0004.1.v3.1	Transcript	3_prime_UTR_variant	1138	NA	NA	NA	NA	NA
29379693_1184554	29379693	A	Thupl.29379693s0002	Thupl.29379693s0002.1.v3.1	Transcript	3_prime_UTR_variant	1931	NA	NA	NA	NA	NA
29379693_1662001	29379693	G	Thupl.29379693s0003	Thupl.29379693s0003.1.v3.1	Transcript	3_prime_UTR_variant	2247	NA	NA	NA	NA	NA
29379694_3420177	29379694	T	Thupl.29379694s0014	Thupl.29379694s0014.1.v3.1	Transcript	3_prime_UTR_variant	2891	NA	NA	NA	NA	NA
29379708_296068	29379708	A	Thupl.29379708s0004	Thupl.29379708s0004.1.v3.1	Transcript	3_prime_UTR_variant	2382	NA	NA	NA	NA	NA
29379708_402867	29379708	T	Thupl.29379708s0005	Thupl.29379708s0005.1.v3.1	Transcript	3_prime_UTR_variant	4257	NA	NA	NA	NA	NA
29379708_403045	29379708	G	Thupl.29379708s0005	Thupl.29379708s0005.1.v3.1	Transcript	3_prime_UTR_variant	4079	NA	NA	NA	NA	NA
29379713_3442593	29379713	T	Thupl.29379713s0033	Thupl.29379713s0033.1.v3.1	Transcript	3_prime_UTR_variant	509	NA	NA	NA	NA	NA
29379716_2221920	29379716	T	Thupl.29379716s0011	Thupl.29379716s0011.1.v3.1	Transcript	3_prime_UTR_variant	1898	NA	NA	NA	NA	NA
29379718_36119	29379718	T	Thupl.29379718s0001	Thupl.29379718s0001.1.v3.1	Transcript	3_prime_UTR_variant	1592	NA	NA	NA	NA	NA
29379720_161701	29379720	A	Thupl.29379720s0005	Thupl.29379720s0005.1.v3.1	Transcript	3_prime_UTR_variant	696	NA	NA	NA	NA	NA
29379727_55486	29379727	G	Thupl.29379727s0003	Thupl.29379727s0003.1.v3.1	Transcript	3_prime_UTR_variant	2630	NA	NA	NA	NA	NA
29379728_1162666	29379728	C	Thupl.29379728s0009	Thupl.29379728s0009.1.v3.1	Transcript	3_prime_UTR_variant	3286	NA	NA	NA	NA	NA
29379728_2667100	29379728	T	Thupl.29379728s0018	Thupl.29379728s0018.1.v3.1	Transcript	3_prime_UTR_variant	1980	NA	NA	NA	NA	NA
29379728_2667146	29379728	C	Thupl.29379728s0018	Thupl.29379728s0018.1.v3.1	Transcript	3_prime_UTR_variant	1934	NA	NA	NA	NA	NA
29379732_431329	29379732	G	Thupl.29379732s0002	Thupl.29379732s0002.1.v3.1	Transcript	3_prime_UTR_variant	1238	NA	NA	NA	NA	NA
29379732_431367	29379732	A	Thupl.29379732s0002	Thupl.29379732s0002.1.v3.1	Transcript	3_prime_UTR_variant	1200	NA	NA	NA	NA	NA
29379736_59550	29379736	T	Thupl.29379736s0001	Thupl.29379736s0001.1.v3.1	Transcript	3_prime_UTR_variant	848	NA	NA	NA	NA	NA
29379740_45307	29379740	T	Thupl.29379740s0003	Thupl.29379740s0003.1.v3.1	Transcript	3_prime_UTR_variant	1672	NA	NA	NA	NA	NA
29379744_1059751	29379744	G	Thupl.29379744s0005	Thupl.29379744s0005.1.v3.1	Transcript	3_prime_UTR_variant	3469	NA	NA	NA	NA	NA
29379747_164687	29379747	C	Thupl.29379747s0001	Thupl.29379747s0001.1.v3.1	Transcript	3_prime_UTR_variant	1870	NA	NA	NA	NA	NA
29379747_164693	29379747	C	Thupl.29379747s0001	Thupl.29379747s0001.1.v3.1	Transcript	3_prime_UTR_variant	1876	NA	NA	NA	NA	NA
29379747_164719	29379747	C	Thupl.29379747s0001	Thupl.29379747s0001.1.v3.1	Transcript	3_prime_UTR_variant	1902	NA	NA	NA	NA	NA
29379747_164729	29379747	G	Thupl.29379747s0001	Thupl.29379747s0001.1.v3.1	Transcript	3_prime_UTR_variant	1912	NA	NA	NA	NA	NA
29379747_271165	29379747	G	Thupl.29379747s0003	Thupl.29379747s0003.2.v3.1	Transcript	3_prime_UTR_variant	379	NA	NA	NA	NA	NA
29379747_680206	29379747	C	Thupl.29379747s0007	Thupl.29379747s0007.1.v3.1	Transcript	3_prime_UTR_variant	1767	NA	NA	NA	NA	NA
29379747_680279	29379747	G	Thupl.29379747s0007	Thupl.29379747s0007.1.v3.1	Transcript	3_prime_UTR_variant	1840	NA	NA	NA	NA	NA
29379752_870336	29379752	C	Thupl.29379752s0002	Thupl.29379752s0002.1.v3.1	Transcript	3_prime_UTR_variant	1237	NA	NA	NA	NA	NA
29379752_1814180	29379752	G	Thupl.29379752s0008	Thupl.29379752s0008.1.v3.1	Transcript	3_prime_UTR_variant	898	NA	NA	NA	NA	NA
29379753_2591453	29379753	C	Thupl.29379753s0008	Thupl.29379753s0008.1.v3.1	Transcript	3_prime_UTR_variant	2655	NA	NA	NA	NA	NA
29379753_3764304	29379753	A	Thupl.29379753s0013	Thupl.29379753s0013.1.v3.1	Transcript	3_prime_UTR_variant	1398	NA	NA	NA	NA	NA
29379753_3764389	29379753	T	Thupl.29379753s0013	Thupl.29379753s0013.1.v3.1	Transcript	3_prime_UTR_variant	1483	NA	NA	NA	NA	NA
29379753_4134477	29379753	C	Thupl.29379753s0016	Thupl.29379753s0016.1.v3.1	Transcript	3_prime_UTR_variant	1187	NA	NA	NA	NA	NA
29379759_151138	29379759	A	Thupl.29379759s0002	Thupl.29379759s0002.1.v3.1	Transcript	3_prime_UTR_variant	2564	NA	NA	NA	NA	NA
29379759_151140	29379759	T	Thupl.29379759s0002	Thupl.29379759s0002.1.v3.1	Transcript	3_prime_UTR_variant	2562	NA	NA	NA	NA	NA
29379759_151158	29379759	A	Thupl.29379759s0002	Thupl.29379759s0002.1.v3.1	Transcript	3_prime_UTR_variant	2544	NA	NA	NA	NA	NA
29379759_151848	29379759	G	Thupl.29379759s0002	Thupl.29379759s0002.1.v3.1	Transcript	3_prime_UTR_variant	1854	NA	NA	NA	NA	NA
29379760_437674	29379760	C	Thupl.29379760s0001	Thupl.29379760s0001.1.v3.1	Transcript	3_prime_UTR_variant	19433	NA	NA	NA	NA	NA
29379760_437676	29379760	T	Thupl.29379760s0001	Thupl.29379760s0001.1.v3.1	Transcript	3_prime_UTR_variant	19435	NA	NA	NA	NA	NA
29379763_983552	29379763	A	Thupl.29379763s0005	Thupl.29379763s0005.1.v3.1	Transcript	3_prime_UTR_variant	1307	NA	NA	NA	NA	NA
29379763_983689	29379763	T	Thupl.29379763s0005	Thupl.29379763s0005.1.v3.1	Transcript	3_prime_UTR_variant	1444	NA	NA	NA	NA	NA
29379765_2151634	29379765	C	Thupl.29379765s0014	Thupl.29379765s0014.1.v3.1	Transcript	3_prime_UTR_variant	2819	NA	NA	NA	NA	NA
29379765_2469864	29379765	C	Thupl.29379765s0015	Thupl.29379765s0015.1.v3.1	Transcript	3_prime_UTR_variant	3075	NA	NA	NA	NA	NA
29379771_380300	29379771	T	Thupl.29379771s0001	Thupl.29379771s0001.1.v3.1	Transcript	3_prime_UTR_variant	1560	NA	NA	NA	NA	NA
29379771_380305	29379771	G	Thupl.29379771s0001	Thupl.29379771s0001.1.v3.1	Transcript	3_prime_UTR_variant	1555	NA	NA	NA	NA	NA
29379771_1077668	29379771	C	Thupl.29379771s0005	Thupl.29379771s0005.1.v3.1	Transcript	3_prime_UTR_variant	810	NA	NA	NA	NA	NA
29379771_1078086	29379771	C	Thupl.29379771s0005	Thupl.29379771s0005.1.v3.1	Transcript	3_prime_UTR_variant	392	NA	NA	NA	NA	NA
29379771_1456351	29379771	G	Thupl.29379771s0010	Thupl.29379771s0010.1.v3.1	Transcript	3_prime_UTR_variant	806	NA	NA	NA	NA	NA
29379771_1456858	29379771	T	Thupl.29379771s0010	Thupl.29379771s0010.1.v3.1	Transcript	3_prime_UTR_variant	415	NA	NA	NA	NA	NA
29379771_1456877	29379771	A	Thupl.29379771s0010	Thupl.29379771s0010.1.v3.1	Transcript	3_prime_UTR_variant	396	NA	NA	NA	NA	NA
29379771_2809899	29379771	C	Thupl.29379771s0019	Thupl.29379771s0019.1.v3.1	Transcript	3_prime_UTR_variant	424	NA	NA	NA	NA	NA
29379782_206924	29379782	G	Thupl.29379782s0001	Thupl.29379782s0001.1.v3.1	Transcript	3_prime_UTR_variant	821	NA	NA	NA	NA	NA
29379782_206944	29379782	A	Thupl.29379782s0001	Thupl.29379782s0001.1.v3.1	Transcript	3_prime_UTR_variant	841	NA	NA	NA	NA	NA
29379782_267666	29379782	A	Thupl.29379782s0002	Thupl.29379782s0002.1.v3.1	Transcript	3_prime_UTR_variant	486	NA	NA	NA	NA	NA
29379782_267676	29379782	T	Thupl.29379782s0002	Thupl.29379782s0002.1.v3.1	Transcript	3_prime_UTR_variant	476	NA	NA	NA	NA	NA
29379782_267686	29379782	T	Thupl.29379782s0002	Thupl.29379782s0002.1.v3.1	Transcript	3_prime_UTR_variant	466	NA	NA	NA	NA	NA
29379782_1262874	29379782	G	Thupl.29379782s0009	Thupl.29379782s0009.1.v3.1	Transcript	3_prime_UTR_variant	829	NA	NA	NA	NA	NA
29379782_1269290	29379782	A	Thupl.29379782s0010	Thupl.29379782s0010.1.v3.1	Transcript	3_prime_UTR_variant	1099	NA	NA	NA	NA	NA
29379782_1999747	29379782	T	Thupl.29379782s0016	Thupl.29379782s0016.2.v3.1	Transcript	3_prime_UTR_variant	1216	NA	NA	NA	NA	NA
29379782_1999891	29379782	A	Thupl.29379782s0016	Thupl.29379782s0016.2.v3.1	Transcript	3_prime_UTR_variant	1360	NA	NA	NA	NA	NA
29379782_2000062	29379782	A	Thupl.29379782s0016	Thupl.29379782s0016.2.v3.1	Transcript	3_prime_UTR_variant	1531	NA	NA	NA	NA	NA
29379783_2675674	29379783	A	Thupl.29379783s0007	Thupl.29379783s0007.1.v3.1	Transcript	3_prime_UTR_variant	2461	NA	NA	NA	NA	NA
29379784_789567	29379784	T	Thupl.29379784s0006	Thupl.29379784s0006.1.v3.1	Transcript	3_prime_UTR_variant	1716	NA	NA	NA	NA	NA
29379784_789770	29379784	A	Thupl.29379784s0006	Thupl.29379784s0006.1.v3.1	Transcript	3_prime_UTR_variant	1513	NA	NA	NA	NA	NA
29379784_789771	29379784	A	Thupl.29379784s0006	Thupl.29379784s0006.1.v3.1	Transcript	3_prime_UTR_variant	1512	NA	NA	NA	NA	NA
29379789_12175	29379789	C	Thupl.29379789s0001	Thupl.29379789s0001.1.v3.1	Transcript	3_prime_UTR_variant	2263	NA	NA	NA	NA	NA
29379789_97275	29379789	C	Thupl.29379789s0002	Thupl.29379789s0002.1.v3.1	Transcript	3_prime_UTR_variant	1124	NA	NA	NA	NA	NA
29379789_671847	29379789	T	Thupl.29379789s0010	Thupl.29379789s0010.1.v3.1	Transcript	3_prime_UTR_variant	1598	NA	NA	NA	NA	NA
29379789_672004	29379789	G	Thupl.29379789s0010	Thupl.29379789s0010.1.v3.1	Transcript	3_prime_UTR_variant	1441	NA	NA	NA	NA	NA
29379789_672008	29379789	A	Thupl.29379789s0010	Thupl.29379789s0010.1.v3.1	Transcript	3_prime_UTR_variant	1437	NA	NA	NA	NA	NA
29379790_2123994	29379790	A	Thupl.29379790s0018	Thupl.29379790s0018.1.v3.1	Transcript	3_prime_UTR_variant	2228	NA	NA	NA	NA	NA
29379795_2490850	29379795	G	Thupl.29379795s0008	Thupl.29379795s0008.1.v3.1	Transcript	3_prime_UTR_variant	1556	NA	NA	NA	NA	NA
29379795_2490863	29379795	A	Thupl.29379795s0008	Thupl.29379795s0008.1.v3.1	Transcript	3_prime_UTR_variant	1569	NA	NA	NA	NA	NA
29379795_2490993	29379795	A	Thupl.29379795s0008	Thupl.29379795s0008.1.v3.1	Transcript	3_prime_UTR_variant	1699	NA	NA	NA	NA	NA
29379795_2491042	29379795	A	Thupl.29379795s0008	Thupl.29379795s0008.1.v3.1	Transcript	3_prime_UTR_variant	1748	NA	NA	NA	NA	NA
29379795_2491095	29379795	C	Thupl.29379795s0008	Thupl.29379795s0008.1.v3.1	Transcript	3_prime_UTR_variant	1801	NA	NA	NA	NA	NA
29379795_2491443	29379795	C	Thupl.29379795s0008	Thupl.29379795s0008.1.v3.1	Transcript	3_prime_UTR_variant	2149	NA	NA	NA	NA	NA
29379795_2491444	29379795	G	Thupl.29379795s0008	Thupl.29379795s0008.1.v3.1	Transcript	3_prime_UTR_variant	2150	NA	NA	NA	NA	NA
29379797_1174698	29379797	T	Thupl.29379797s0011	Thupl.29379797s0011.1.v3.1	Transcript	3_prime_UTR_variant	2665	NA	NA	NA	NA	NA
29379797_1506677	29379797	A	Thupl.29379797s0017	Thupl.29379797s0017.1.v3.1	Transcript	3_prime_UTR_variant	2183	NA	NA	NA	NA	NA
29379797_2056080	29379797	A	Thupl.29379797s0021	Thupl.29379797s0021.1.v3.1	Transcript	3_prime_UTR_variant	3285	NA	NA	NA	NA	NA
29379799_2047567	29379799	C	Thupl.29379799s0009	Thupl.29379799s0009.1.v3.1	Transcript	3_prime_UTR_variant	1097	NA	NA	NA	NA	NA
29379799_3010926	29379799	G	Thupl.29379799s0013	Thupl.29379799s0013.1.v3.1	Transcript	3_prime_UTR_variant	2029	NA	NA	NA	NA	NA
29379799_3011005	29379799	A	Thupl.29379799s0013	Thupl.29379799s0013.1.v3.1	Transcript	3_prime_UTR_variant	2108	NA	NA	NA	NA	NA
29379799_3073075	29379799	G	Thupl.29379799s0014	Thupl.29379799s0014.1.v3.1	Transcript	3_prime_UTR_variant	2036	NA	NA	NA	NA	NA
29379799_4016173	29379799	G	Thupl.29379799s0020	Thupl.29379799s0020.1.v3.1	Transcript	3_prime_UTR_variant	3320	NA	NA	NA	NA	NA
29379799_4016272	29379799	G	Thupl.29379799s0020	Thupl.29379799s0020.1.v3.1	Transcript	3_prime_UTR_variant	3419	NA	NA	NA	NA	NA
29379802_2152039	29379802	G	Thupl.29379802s0011	Thupl.29379802s0011.1.v3.1	Transcript	3_prime_UTR_variant	2403	NA	NA	NA	NA	NA
29379805_2711138	29379805	A	Thupl.29379805s0018	Thupl.29379805s0018.1.v3.1	Transcript	3_prime_UTR_variant	1061	NA	NA	NA	NA	NA
29379805_3062438	29379805	A	Thupl.29379805s0019	Thupl.29379805s0019.1.v3.1	Transcript	3_prime_UTR_variant	3207	NA	NA	NA	NA	NA
29379805_3847186	29379805	G	Thupl.29379805s0020	Thupl.29379805s0020.2.v3.1	Transcript	3_prime_UTR_variant	1620	NA	NA	NA	NA	NA
29379805_3927979	29379805	A	Thupl.29379805s0021	Thupl.29379805s0021.1.v3.1	Transcript	3_prime_UTR_variant	2543	NA	NA	NA	NA	NA
29379808_1206946	29379808	A	Thupl.29379808s0009	Thupl.29379808s0009.1.v3.1	Transcript	3_prime_UTR_variant	517	NA	NA	NA	NA	NA
29379808_2155719	29379808	G	Thupl.29379808s0021	Thupl.29379808s0021.1.v3.1	Transcript	3_prime_UTR_variant	1559	NA	NA	NA	NA	NA
29379808_3139728	29379808	T	Thupl.29379808s0024	Thupl.29379808s0024.1.v3.1	Transcript	3_prime_UTR_variant	3504	NA	NA	NA	NA	NA
29379808_4509943	29379808	C	Thupl.29379808s0034	Thupl.29379808s0034.1.v3.1	Transcript	3_prime_UTR_variant	621	NA	NA	NA	NA	NA
29379810_1716371	29379810	C	Thupl.29379810s0002	Thupl.29379810s0002.1.v3.1	Transcript	3_prime_UTR_variant	5758	NA	NA	NA	NA	NA
29379813_1538737	29379813	T	Thupl.29379813s0009	Thupl.29379813s0009.1.v3.1	Transcript	3_prime_UTR_variant	1444	NA	NA	NA	NA	NA
29379813_1693736	29379813	T	Thupl.29379813s0010	Thupl.29379813s0010.1.v3.1	Transcript	3_prime_UTR_variant	1230	NA	NA	NA	NA	NA
29379817_2659294	29379817	A	Thupl.29379817s0016	Thupl.29379817s0016.1.v3.1	Transcript	3_prime_UTR_variant	2881	NA	NA	NA	NA	NA
29379817_3782835	29379817	C	Thupl.29379817s0019	Thupl.29379817s0019.1.v3.1	Transcript	3_prime_UTR_variant	845	NA	NA	NA	NA	NA
29379818_274907	29379818	G	Thupl.29379818s0002	Thupl.29379818s0002.1.v3.1	Transcript	3_prime_UTR_variant	2746	NA	NA	NA	NA	NA
29379831_1092731	29379831	C	Thupl.29379831s0006	Thupl.29379831s0006.1.v3.1	Transcript	3_prime_UTR_variant	2398	NA	NA	NA	NA	NA
29379839_760197	29379839	C	Thupl.29379839s0006	Thupl.29379839s0006.1.v3.1	Transcript	3_prime_UTR_variant	1375	NA	NA	NA	NA	NA
29379839_760232	29379839	T	Thupl.29379839s0006	Thupl.29379839s0006.1.v3.1	Transcript	3_prime_UTR_variant	1340	NA	NA	NA	NA	NA
29379839_760290	29379839	G	Thupl.29379839s0006	Thupl.29379839s0006.1.v3.1	Transcript	3_prime_UTR_variant	1282	NA	NA	NA	NA	NA
29379839_760298	29379839	G	Thupl.29379839s0006	Thupl.29379839s0006.1.v3.1	Transcript	3_prime_UTR_variant	1274	NA	NA	NA	NA	NA
29379841_56941	29379841	T	Thupl.29379841s0001	Thupl.29379841s0001.1.v3.1	Transcript	3_prime_UTR_variant	6552	NA	NA	NA	NA	NA
29379843_266433	29379843	A	Thupl.29379843s0004	Thupl.29379843s0004.1.v3.1	Transcript	3_prime_UTR_variant	1743	NA	NA	NA	NA	NA
29379843_266834	29379843	G	Thupl.29379843s0004	Thupl.29379843s0004.1.v3.1	Transcript	3_prime_UTR_variant	1484	NA	NA	NA	NA	NA
29379844_511707	29379844	C	Thupl.29379844s0005	Thupl.29379844s0005.2.v3.1	Transcript	3_prime_UTR_variant	3676	NA	NA	NA	NA	NA
29379844_511749	29379844	T	Thupl.29379844s0005	Thupl.29379844s0005.2.v3.1	Transcript	3_prime_UTR_variant	3718	NA	NA	NA	NA	NA
29379850_222267	29379850	T	Thupl.29379850s0002	Thupl.29379850s0002.1.v3.1	Transcript	3_prime_UTR_variant	7155	NA	NA	NA	NA	NA
29379861_3101786	29379861	C	Thupl.29379861s0014	Thupl.29379861s0014.2.v3.1	Transcript	3_prime_UTR_variant	2087	NA	NA	NA	NA	NA
29379862_419351	29379862	A	Thupl.29379862s0004	Thupl.29379862s0004.1.v3.1	Transcript	3_prime_UTR_variant	1892	NA	NA	NA	NA	NA
29379868_2529885	29379868	G	Thupl.29379868s0010	Thupl.29379868s0010.1.v3.1	Transcript	3_prime_UTR_variant	668	NA	NA	NA	NA	NA
29379868_2530056	29379868	T	Thupl.29379868s0010	Thupl.29379868s0010.1.v3.1	Transcript	3_prime_UTR_variant	839	NA	NA	NA	NA	NA
29379871_1234682	29379871	G	Thupl.29379871s0011	Thupl.29379871s0011.1.v3.1	Transcript	3_prime_UTR_variant	2102	NA	NA	NA	NA	NA
29379871_2056626	29379871	T	Thupl.29379871s0020	Thupl.29379871s0020.1.v3.1	Transcript	3_prime_UTR_variant	2802	NA	NA	NA	NA	NA
29379871_2166162	29379871	A	Thupl.29379871s0023	Thupl.29379871s0023.1.v3.1	Transcript	3_prime_UTR_variant	1928	NA	NA	NA	NA	NA
29379871_2563306	29379871	C	Thupl.29379871s0029	Thupl.29379871s0029.1.v3.1	Transcript	3_prime_UTR_variant	2573	NA	NA	NA	NA	NA
29379871_2626914	29379871	C	Thupl.29379871s0030	Thupl.29379871s0030.1.v3.1	Transcript	3_prime_UTR_variant	4664	NA	NA	NA	NA	NA
29379871_2626948	29379871	T	Thupl.29379871s0030	Thupl.29379871s0030.1.v3.1	Transcript	3_prime_UTR_variant	4698	NA	NA	NA	NA	NA
29379871_2626949	29379871	G	Thupl.29379871s0030	Thupl.29379871s0030.1.v3.1	Transcript	3_prime_UTR_variant	4699	NA	NA	NA	NA	NA
29379871_3529493	29379871	T	Thupl.29379871s0035	Thupl.29379871s0035.1.v3.1	Transcript	3_prime_UTR_variant	2121	NA	NA	NA	NA	NA
29379873_696324	29379873	A	Thupl.29379873s0002	Thupl.29379873s0002.1.v3.1	Transcript	3_prime_UTR_variant	1089	NA	NA	NA	NA	NA
29379873_696518	29379873	G	Thupl.29379873s0002	Thupl.29379873s0002.1.v3.1	Transcript	3_prime_UTR_variant	1283	NA	NA	NA	NA	NA
29379873_696610	29379873	C	Thupl.29379873s0002	Thupl.29379873s0002.1.v3.1	Transcript	3_prime_UTR_variant	1375	NA	NA	NA	NA	NA
29379874_3829220	29379874	T	Thupl.29379874s0014	Thupl.29379874s0014.1.v3.1	Transcript	3_prime_UTR_variant	1409	NA	NA	NA	NA	NA
29379874_3829268	29379874	T	Thupl.29379874s0014	Thupl.29379874s0014.1.v3.1	Transcript	3_prime_UTR_variant	1457	NA	NA	NA	NA	NA
29379877_1888679	29379877	A	Thupl.29379877s0007	Thupl.29379877s0007.1.v3.1	Transcript	3_prime_UTR_variant	3342	NA	NA	NA	NA	NA
29379891_1292333	29379891	A	Thupl.29379891s0004	Thupl.29379891s0004.1.v3.1	Transcript	3_prime_UTR_variant	648	NA	NA	NA	NA	NA
29379896_2545298	29379896	A	Thupl.29379896s0017	Thupl.29379896s0017.1.v3.1	Transcript	3_prime_UTR_variant	8255	NA	NA	NA	NA	NA
29379907_831344	29379907	T	Thupl.29379907s0008	Thupl.29379907s0008.1.v3.1	Transcript	3_prime_UTR_variant	2770	NA	NA	NA	NA	NA
29379907_831392	29379907	C	Thupl.29379907s0008	Thupl.29379907s0008.1.v3.1	Transcript	3_prime_UTR_variant	2818	NA	NA	NA	NA	NA
29379907_831428	29379907	A	Thupl.29379907s0008	Thupl.29379907s0008.1.v3.1	Transcript	3_prime_UTR_variant	2854	NA	NA	NA	NA	NA
29379910_443635	29379910	T	Thupl.29379910s0005	Thupl.29379910s0005.1.v3.1	Transcript	3_prime_UTR_variant	1145	NA	NA	NA	NA	NA
29379910_443695	29379910	G	Thupl.29379910s0005	Thupl.29379910s0005.1.v3.1	Transcript	3_prime_UTR_variant	1205	NA	NA	NA	NA	NA
29379915_1173216	29379915	A	Thupl.29379915s0007	Thupl.29379915s0007.1.v3.1	Transcript	3_prime_UTR_variant	1173	NA	NA	NA	NA	NA
29379915_1173293	29379915	G	Thupl.29379915s0007	Thupl.29379915s0007.1.v3.1	Transcript	3_prime_UTR_variant	1250	NA	NA	NA	NA	NA
29379915_1425555	29379915	G	Thupl.29379915s0008	Thupl.29379915s0008.1.v3.1	Transcript	3_prime_UTR_variant	1681	NA	NA	NA	NA	NA
29379919_2072810	29379919	G	Thupl.29379919s0010	Thupl.29379919s0010.1.v3.1	Transcript	3_prime_UTR_variant	1057	NA	NA	NA	NA	NA
29379919_2072812	29379919	C	Thupl.29379919s0010	Thupl.29379919s0010.1.v3.1	Transcript	3_prime_UTR_variant	1055	NA	NA	NA	NA	NA
29379926_38353	29379926	G	Thupl.29379926s0001	Thupl.29379926s0001.1.v3.1	Transcript	3_prime_UTR_variant	2023	NA	NA	NA	NA	NA
29379926_217996	29379926	A	Thupl.29379926s0002	Thupl.29379926s0002.7.v3.1	Transcript	3_prime_UTR_variant	3106	NA	NA	NA	NA	NA
29379926_218144	29379926	G	Thupl.29379926s0002	Thupl.29379926s0002.7.v3.1	Transcript	3_prime_UTR_variant	3254	NA	NA	NA	NA	NA
29379926_218262	29379926	C	Thupl.29379926s0002	Thupl.29379926s0002.7.v3.1	Transcript	3_prime_UTR_variant	3372	NA	NA	NA	NA	NA
29379926_218288	29379926	A	Thupl.29379926s0002	Thupl.29379926s0002.7.v3.1	Transcript	3_prime_UTR_variant	3398	NA	NA	NA	NA	NA
29379930_69725	29379930	A	Thupl.29379930s0002	Thupl.29379930s0002.1.v3.1	Transcript	3_prime_UTR_variant	1809	NA	NA	NA	NA	NA
29379931_410167	29379931	T	Thupl.29379931s0001	Thupl.29379931s0001.1.v3.1	Transcript	3_prime_UTR_variant	2066	NA	NA	NA	NA	NA
29379932_1750613	29379932	A	Thupl.29379932s0006	Thupl.29379932s0006.1.v3.1	Transcript	3_prime_UTR_variant	929	NA	NA	NA	NA	NA
29379933_2870087	29379933	T	Thupl.29379933s0023	Thupl.29379933s0023.1.v3.1	Transcript	3_prime_UTR_variant	1251	NA	NA	NA	NA	NA
29379938_435295	29379938	C	Thupl.29379938s0002	Thupl.29379938s0002.1.v3.1	Transcript	3_prime_UTR_variant	4785	NA	NA	NA	NA	NA
29379938_547768	29379938	T	Thupl.29379938s0003	Thupl.29379938s0003.1.v3.1	Transcript	3_prime_UTR_variant	2763	NA	NA	NA	NA	NA
29379939_3972862	29379939	A	Thupl.29379939s0021	Thupl.29379939s0021.1.v3.1	Transcript	3_prime_UTR_variant	2924	NA	NA	NA	NA	NA
29379939_5207017	29379939	G	Thupl.29379939s0027	Thupl.29379939s0027.1.v3.1	Transcript	3_prime_UTR_variant	1460	NA	NA	NA	NA	NA
29379939_5207255	29379939	T	Thupl.29379939s0027	Thupl.29379939s0027.1.v3.1	Transcript	3_prime_UTR_variant	1222	NA	NA	NA	NA	NA
29379945_2263986	29379945	T	Thupl.29379945s0019	Thupl.29379945s0019.1.v3.1	Transcript	3_prime_UTR_variant	1732	NA	NA	NA	NA	NA
29379948_4498480	29379948	C	Thupl.29379948s0015	Thupl.29379948s0015.1.v3.1	Transcript	3_prime_UTR_variant	1801	NA	NA	NA	NA	NA
29379948_4498543	29379948	A	Thupl.29379948s0015	Thupl.29379948s0015.1.v3.1	Transcript	3_prime_UTR_variant	1738	NA	NA	NA	NA	NA
29379948_4696376	29379948	C	Thupl.29379948s0016	Thupl.29379948s0016.10.v3.1	Transcript	3_prime_UTR_variant	1191	NA	NA	NA	NA	NA
29379948_4696610	29379948	C	Thupl.29379948s0016	Thupl.29379948s0016.10.v3.1	Transcript	3_prime_UTR_variant	1425	NA	NA	NA	NA	NA
29379948_4696659	29379948	A	Thupl.29379948s0016	Thupl.29379948s0016.10.v3.1	Transcript	3_prime_UTR_variant	1474	NA	NA	NA	NA	NA
29379957_765252	29379957	G	Thupl.29379957s0003	Thupl.29379957s0003.1.v3.1	Transcript	3_prime_UTR_variant	3234	NA	NA	NA	NA	NA
29379959_3707479	29379959	C	Thupl.29379959s0021	Thupl.29379959s0021.1.v3.1	Transcript	3_prime_UTR_variant	1614	NA	NA	NA	NA	NA
29379962_1724196	29379962	T	Thupl.29379962s0011	Thupl.29379962s0011.1.v3.1	Transcript	3_prime_UTR_variant	1516	NA	NA	NA	NA	NA
29379965_1519715	29379965	A	Thupl.29379965s0014	Thupl.29379965s0014.1.v3.1	Transcript	3_prime_UTR_variant	3118	NA	NA	NA	NA	NA
29379965_1519732	29379965	A	Thupl.29379965s0014	Thupl.29379965s0014.1.v3.1	Transcript	3_prime_UTR_variant	3135	NA	NA	NA	NA	NA
29379965_1519766	29379965	T	Thupl.29379965s0014	Thupl.29379965s0014.1.v3.1	Transcript	3_prime_UTR_variant	3169	NA	NA	NA	NA	NA
29379965_1522929	29379965	C	Thupl.29379965s0014	Thupl.29379965s0014.1.v3.1	Transcript	3_prime_UTR_variant	6246	NA	NA	NA	NA	NA
29379968_1886222	29379968	G	Thupl.29379968s0007	Thupl.29379968s0007.1.v3.1	Transcript	3_prime_UTR_variant	1536	NA	NA	NA	NA	NA
29379968_1886242	29379968	C	Thupl.29379968s0007	Thupl.29379968s0007.1.v3.1	Transcript	3_prime_UTR_variant	1556	NA	NA	NA	NA	NA
29379973_1680602	29379973	T	Thupl.29379973s0003	Thupl.29379973s0003.1.v3.1	Transcript	3_prime_UTR_variant	2522	NA	NA	NA	NA	NA
29379975_677510	29379975	A	Thupl.29379975s0007	Thupl.29379975s0007.1.v3.1	Transcript	3_prime_UTR_variant	2622	NA	NA	NA	NA	NA
29379975_808100	29379975	C	Thupl.29379975s0008	Thupl.29379975s0008.1.v3.1	Transcript	3_prime_UTR_variant	1687	NA	NA	NA	NA	NA
29379975_808120	29379975	C	Thupl.29379975s0008	Thupl.29379975s0008.1.v3.1	Transcript	3_prime_UTR_variant	1667	NA	NA	NA	NA	NA
29379975_1283989	29379975	C	Thupl.29379975s0011	Thupl.29379975s0011.1.v3.1	Transcript	3_prime_UTR_variant	4098	NA	NA	NA	NA	NA
29379975_1284018	29379975	T	Thupl.29379975s0011	Thupl.29379975s0011.1.v3.1	Transcript	3_prime_UTR_variant	4127	NA	NA	NA	NA	NA
29379979_2232065	29379979	T	Thupl.29379979s0009	Thupl.29379979s0009.1.v3.1	Transcript	3_prime_UTR_variant	1739	NA	NA	NA	NA	NA
29379979_2232137	29379979	C	Thupl.29379979s0009	Thupl.29379979s0009.1.v3.1	Transcript	3_prime_UTR_variant	1667	NA	NA	NA	NA	NA
29379987_269050	29379987	G	Thupl.29379987s0006	Thupl.29379987s0006.1.v3.1	Transcript	3_prime_UTR_variant	1915	NA	NA	NA	NA	NA
29379987_269095	29379987	T	Thupl.29379987s0006	Thupl.29379987s0006.1.v3.1	Transcript	3_prime_UTR_variant	1960	NA	NA	NA	NA	NA
29379987_425989	29379987	T	Thupl.29379987s0007	Thupl.29379987s0007.1.v3.1	Transcript	3_prime_UTR_variant	3255	NA	NA	NA	NA	NA
29379996_1535138	29379996	C	Thupl.29379996s0012	Thupl.29379996s0012.1.v3.1	Transcript	3_prime_UTR_variant	1330	NA	NA	NA	NA	NA
29379996_1916074	29379996	G	Thupl.29379996s0015	Thupl.29379996s0015.1.v3.1	Transcript	3_prime_UTR_variant	1367	NA	NA	NA	NA	NA
29379996_2361695	29379996	A	Thupl.29379996s0018	Thupl.29379996s0018.1.v3.1	Transcript	3_prime_UTR_variant	2449	NA	NA	NA	NA	NA
29379996_2362040	29379996	G	Thupl.29379996s0018	Thupl.29379996s0018.1.v3.1	Transcript	3_prime_UTR_variant	2104	NA	NA	NA	NA	NA
29379996_3683879	29379996	C	Thupl.29379996s0021	Thupl.29379996s0021.1.v3.1	Transcript	3_prime_UTR_variant	2219	NA	NA	NA	NA	NA
29379996_3683894	29379996	T	Thupl.29379996s0021	Thupl.29379996s0021.1.v3.1	Transcript	3_prime_UTR_variant	2204	NA	NA	NA	NA	NA
29379996_3683900	29379996	T	Thupl.29379996s0021	Thupl.29379996s0021.1.v3.1	Transcript	3_prime_UTR_variant	2198	NA	NA	NA	NA	NA
29379996_3683915	29379996	G	Thupl.29379996s0021	Thupl.29379996s0021.1.v3.1	Transcript	3_prime_UTR_variant	2183	NA	NA	NA	NA	NA
29379996_5644661	29379996	T	Thupl.29379996s0029	Thupl.29379996s0029.4.v3.1	Transcript	3_prime_UTR_variant	3002	NA	NA	NA	NA	NA
29379996_5644932	29379996	G	Thupl.29379996s0029	Thupl.29379996s0029.1.v3.1	Transcript	3_prime_UTR_variant	2731	NA	NA	NA	NA	NA
29379997_4253333	29379997	A	Thupl.29379997s0015	Thupl.29379997s0015.1.v3.1	Transcript	3_prime_UTR_variant	1493	NA	NA	NA	NA	NA
29379999_281672	29379999	A	Thupl.29379999s0002	Thupl.29379999s0002.1.v3.1	Transcript	3_prime_UTR_variant	1134	NA	NA	NA	NA	NA
29380003_406609	29380003	C	Thupl.29380003s0003	Thupl.29380003s0003.1.v3.1	Transcript	3_prime_UTR_variant	1226	NA	NA	NA	NA	NA
29380010_1775640	29380010	G	Thupl.29380010s0009	Thupl.29380010s0009.1.v3.1	Transcript	3_prime_UTR_variant	1275	NA	NA	NA	NA	NA
29380013_8724917	29380013	T	Thupl.29380013s0021	Thupl.29380013s0021.1.v3.1	Transcript	3_prime_UTR_variant	4174	NA	NA	NA	NA	NA
29380013_11659630	29380013	T	Thupl.29380013s0028	Thupl.29380013s0028.1.v3.1	Transcript	3_prime_UTR_variant	1481	NA	NA	NA	NA	NA
29380014_1263821	29380014	A	Thupl.29380014s0016	Thupl.29380014s0016.1.v3.1	Transcript	3_prime_UTR_variant	2394	NA	NA	NA	NA	NA
29380016_1055514	29380016	T	Thupl.29380016s0004	Thupl.29380016s0004.1.v3.1	Transcript	3_prime_UTR_variant	1994	NA	NA	NA	NA	NA
29380016_1055574	29380016	C	Thupl.29380016s0004	Thupl.29380016s0004.1.v3.1	Transcript	3_prime_UTR_variant	2054	NA	NA	NA	NA	NA
29380016_1055610	29380016	T	Thupl.29380016s0004	Thupl.29380016s0004.1.v3.1	Transcript	3_prime_UTR_variant	2090	NA	NA	NA	NA	NA
29380016_2132249	29380016	C	Thupl.29380016s0011	Thupl.29380016s0011.2.v3.1	Transcript	3_prime_UTR_variant	1410	NA	NA	NA	NA	NA
29380017_1846364	29380017	A	Thupl.29380017s0016	Thupl.29380017s0016.1.v3.1	Transcript	3_prime_UTR_variant	801	NA	NA	NA	NA	NA
29380021_1436997	29380021	C	Thupl.29380021s0011	Thupl.29380021s0011.1.v3.1	Transcript	3_prime_UTR_variant	2652	NA	NA	NA	NA	NA
29380029_1706738	29380029	C	Thupl.29380029s0013	Thupl.29380029s0013.1.v3.1	Transcript	3_prime_UTR_variant	2714	NA	NA	NA	NA	NA
29380035_205334	29380035	G	Thupl.29380035s0002	Thupl.29380035s0002.1.v3.1	Transcript	3_prime_UTR_variant	1332	NA	NA	NA	NA	NA
29380041_56756	29380041	G	Thupl.29380041s0001	Thupl.29380041s0001.1.v3.1	Transcript	3_prime_UTR_variant	3679	NA	NA	NA	NA	NA
29380041_56781	29380041	T	Thupl.29380041s0001	Thupl.29380041s0001.1.v3.1	Transcript	3_prime_UTR_variant	3654	NA	NA	NA	NA	NA
29380045_572974	29380045	G	Thupl.29380045s0002	Thupl.29380045s0002.2.v3.1	Transcript	3_prime_UTR_variant	1075	NA	NA	NA	NA	NA
29380045_573110	29380045	G	Thupl.29380045s0002	Thupl.29380045s0002.1.v3.1	Transcript	3_prime_UTR_variant	1061	NA	NA	NA	NA	NA
29380045_573143	29380045	T	Thupl.29380045s0002	Thupl.29380045s0002.1.v3.1	Transcript	3_prime_UTR_variant	1028	NA	NA	NA	NA	NA
29380045_573178	29380045	G	Thupl.29380045s0002	Thupl.29380045s0002.1.v3.1	Transcript	3_prime_UTR_variant	993	NA	NA	NA	NA	NA
29380045_573212	29380045	T	Thupl.29380045s0002	Thupl.29380045s0002.1.v3.1	Transcript	3_prime_UTR_variant	959	NA	NA	NA	NA	NA
29380045_573213	29380045	A	Thupl.29380045s0002	Thupl.29380045s0002.1.v3.1	Transcript	3_prime_UTR_variant	958	NA	NA	NA	NA	NA
29380045_573255	29380045	G	Thupl.29380045s0002	Thupl.29380045s0002.1.v3.1	Transcript	3_prime_UTR_variant	916	NA	NA	NA	NA	NA
29380045_597985	29380045	A	Thupl.29380045s0003	Thupl.29380045s0003.1.v3.1	Transcript	3_prime_UTR_variant	932	NA	NA	NA	NA	NA
29380045_598030	29380045	A	Thupl.29380045s0003	Thupl.29380045s0003.1.v3.1	Transcript	3_prime_UTR_variant	977	NA	NA	NA	NA	NA
29380045_598160	29380045	T	Thupl.29380045s0003	Thupl.29380045s0003.1.v3.1	Transcript	3_prime_UTR_variant	1107	NA	NA	NA	NA	NA
29380045_598170	29380045	G	Thupl.29380045s0003	Thupl.29380045s0003.1.v3.1	Transcript	3_prime_UTR_variant	1117	NA	NA	NA	NA	NA
29380047_1335339	29380047	G	Thupl.29380047s0012	Thupl.29380047s0012.1.v3.1	Transcript	3_prime_UTR_variant	2786	NA	NA	NA	NA	NA
29380060_723669	29380060	A	Thupl.29380060s0003	Thupl.29380060s0003.1.v3.1	Transcript	3_prime_UTR_variant	1798	NA	NA	NA	NA	NA
29380060_723725	29380060	T	Thupl.29380060s0003	Thupl.29380060s0003.1.v3.1	Transcript	3_prime_UTR_variant	1854	NA	NA	NA	NA	NA
29380065_1498724	29380065	T	Thupl.29380065s0005	Thupl.29380065s0005.5.v3.1	Transcript	3_prime_UTR_variant	1569	NA	NA	NA	NA	NA
29380075_951877	29380075	A	Thupl.29380075s0007	Thupl.29380075s0007.1.v3.1	Transcript	3_prime_UTR_variant	1795	NA	NA	NA	NA	NA
29380077_1336431	29380077	G	Thupl.29380077s0008	Thupl.29380077s0008.1.v3.1	Transcript	3_prime_UTR_variant	864	NA	NA	NA	NA	NA
29380090_1450293	29380090	A	Thupl.29380090s0012	Thupl.29380090s0012.1.v3.1	Transcript	3_prime_UTR_variant	1458	NA	NA	NA	NA	NA
29380090_1450347	29380090	A	Thupl.29380090s0012	Thupl.29380090s0012.1.v3.1	Transcript	3_prime_UTR_variant	1404	NA	NA	NA	NA	NA
29380093_920586	29380093	C	Thupl.29380093s0002	Thupl.29380093s0002.1.v3.1	Transcript	3_prime_UTR_variant	1328	NA	NA	NA	NA	NA
29380093_920685	29380093	C	Thupl.29380093s0002	Thupl.29380093s0002.1.v3.1	Transcript	3_prime_UTR_variant	1427	NA	NA	NA	NA	NA
29380093_920698	29380093	T	Thupl.29380093s0002	Thupl.29380093s0002.1.v3.1	Transcript	3_prime_UTR_variant	1440	NA	NA	NA	NA	NA
29380093_1207621	29380093	G	Thupl.29380093s0004	Thupl.29380093s0004.1.v3.1	Transcript	3_prime_UTR_variant	1725	NA	NA	NA	NA	NA
29380102_422447	29380102	A	Thupl.29380102s0002	Thupl.29380102s0002.1.v3.1	Transcript	3_prime_UTR_variant	926	NA	NA	NA	NA	NA
29380102_422495	29380102	C	Thupl.29380102s0002	Thupl.29380102s0002.1.v3.1	Transcript	3_prime_UTR_variant	974	NA	NA	NA	NA	NA
29380113_627141	29380113	A	Thupl.29380113s0008	Thupl.29380113s0008.1.v3.1	Transcript	3_prime_UTR_variant	1493	NA	NA	NA	NA	NA
29380113_627200	29380113	T	Thupl.29380113s0008	Thupl.29380113s0008.1.v3.1	Transcript	3_prime_UTR_variant	1434	NA	NA	NA	NA	NA
29380113_627252	29380113	G	Thupl.29380113s0008	Thupl.29380113s0008.1.v3.1	Transcript	3_prime_UTR_variant	1382	NA	NA	NA	NA	NA
29380113_1462580	29380113	C	Thupl.29380113s0010	Thupl.29380113s0010.1.v3.1	Transcript	3_prime_UTR_variant	2816	NA	NA	NA	NA	NA
29380114_7101469	29380114	G	Thupl.29380114s0018	Thupl.29380114s0018.3.v3.1	Transcript	3_prime_UTR_variant	1468	NA	NA	NA	NA	NA
29380114_7101495	29380114	C	Thupl.29380114s0018	Thupl.29380114s0018.3.v3.1	Transcript	3_prime_UTR_variant	1442	NA	NA	NA	NA	NA
29380114_7101496	29380114	G	Thupl.29380114s0018	Thupl.29380114s0018.3.v3.1	Transcript	3_prime_UTR_variant	1441	NA	NA	NA	NA	NA
29380116_569157	29380116	A	Thupl.29380116s0006	Thupl.29380116s0006.1.v3.1	Transcript	3_prime_UTR_variant	2078	NA	NA	NA	NA	NA
29380116_569176	29380116	A	Thupl.29380116s0006	Thupl.29380116s0006.1.v3.1	Transcript	3_prime_UTR_variant	2059	NA	NA	NA	NA	NA
29380116_1215872	29380116	T	Thupl.29380116s0008	Thupl.29380116s0008.1.v3.1	Transcript	3_prime_UTR_variant	983	NA	NA	NA	NA	NA
29380118_736867	29380118	T	Thupl.29380118s0003	Thupl.29380118s0003.1.v3.1	Transcript	3_prime_UTR_variant	1846	NA	NA	NA	NA	NA
29380121_153343	29380121	C	Thupl.29380121s0002	Thupl.29380121s0002.1.v3.1	Transcript	3_prime_UTR_variant	587	NA	NA	NA	NA	NA
29380121_1709357	29380121	G	Thupl.29380121s0008	Thupl.29380121s0008.1.v3.1	Transcript	3_prime_UTR_variant	1273	NA	NA	NA	NA	NA
29380121_1709386	29380121	T	Thupl.29380121s0008	Thupl.29380121s0008.1.v3.1	Transcript	3_prime_UTR_variant	1244	NA	NA	NA	NA	NA
29380121_1709398	29380121	C	Thupl.29380121s0008	Thupl.29380121s0008.1.v3.1	Transcript	3_prime_UTR_variant	1232	NA	NA	NA	NA	NA
29380128_1458623	29380128	G	Thupl.29380128s0010	Thupl.29380128s0010.1.v3.1	Transcript	3_prime_UTR_variant	3770	NA	NA	NA	NA	NA
29380133_2692965	29380133	G	Thupl.29380133s0010	Thupl.29380133s0010.1.v3.1	Transcript	3_prime_UTR_variant	1858	NA	NA	NA	NA	NA
29380133_2693024	29380133	A	Thupl.29380133s0010	Thupl.29380133s0010.1.v3.1	Transcript	3_prime_UTR_variant	1917	NA	NA	NA	NA	NA
29380133_3902168	29380133	T	Thupl.29380133s0019	Thupl.29380133s0019.1.v3.1	Transcript	3_prime_UTR_variant	1182	NA	NA	NA	NA	NA
29380133_3902169	29380133	C	Thupl.29380133s0019	Thupl.29380133s0019.1.v3.1	Transcript	3_prime_UTR_variant	1181	NA	NA	NA	NA	NA
29380138_1810272	29380138	A	Thupl.29380138s0007	Thupl.29380138s0007.1.v3.1	Transcript	3_prime_UTR_variant	1328	NA	NA	NA	NA	NA
29380139_59520	29380139	G	Thupl.29380139s0001	Thupl.29380139s0001.1.v3.1	Transcript	3_prime_UTR_variant	1864	NA	NA	NA	NA	NA
29380148_1216571	29380148	C	Thupl.29380148s0030	Thupl.29380148s0030.1.v3.1	Transcript	3_prime_UTR_variant	3136	NA	NA	NA	NA	NA
29380148_1759409	29380148	A	Thupl.29380148s0033	Thupl.29380148s0033.1.v3.1	Transcript	3_prime_UTR_variant	2096	NA	NA	NA	NA	NA
29380148_1759452	29380148	C	Thupl.29380148s0033	Thupl.29380148s0033.1.v3.1	Transcript	3_prime_UTR_variant	2053	NA	NA	NA	NA	NA
29380148_2647104	29380148	G	Thupl.29380148s0035	Thupl.29380148s0035.1.v3.1	Transcript	3_prime_UTR_variant	1327	NA	NA	NA	NA	NA
29380148_2647110	29380148	T	Thupl.29380148s0035	Thupl.29380148s0035.1.v3.1	Transcript	3_prime_UTR_variant	1321	NA	NA	NA	NA	NA
29380148_2647126	29380148	C	Thupl.29380148s0035	Thupl.29380148s0035.1.v3.1	Transcript	3_prime_UTR_variant	1305	NA	NA	NA	NA	NA
29380148_4267968	29380148	T	Thupl.29380148s0044	Thupl.29380148s0044.1.v3.1	Transcript	3_prime_UTR_variant	1864	NA	NA	NA	NA	NA
29380148_4267971	29380148	C	Thupl.29380148s0044	Thupl.29380148s0044.1.v3.1	Transcript	3_prime_UTR_variant	1867	NA	NA	NA	NA	NA
29380152_440875	29380152	G	Thupl.29380152s0006	Thupl.29380152s0006.1.v3.1	Transcript	3_prime_UTR_variant	2915	NA	NA	NA	NA	NA
29380155_1083648	29380155	T	Thupl.29380155s0007	Thupl.29380155s0007.1.v3.1	Transcript	3_prime_UTR_variant	2286	NA	NA	NA	NA	NA
29380155_1422299	29380155	A	Thupl.29380155s0009	Thupl.29380155s0009.1.v3.1	Transcript	3_prime_UTR_variant	1563	NA	NA	NA	NA	NA
29380155_1422349	29380155	A	Thupl.29380155s0009	Thupl.29380155s0009.1.v3.1	Transcript	3_prime_UTR_variant	1613	NA	NA	NA	NA	NA
29380155_1422387	29380155	G	Thupl.29380155s0009	Thupl.29380155s0009.1.v3.1	Transcript	3_prime_UTR_variant	1651	NA	NA	NA	NA	NA
29380156_280251	29380156	T	Thupl.29380156s0001	Thupl.29380156s0001.1.v3.1	Transcript	3_prime_UTR_variant	3532	NA	NA	NA	NA	NA
29380167_1424406	29380167	T	Thupl.29380167s0009	Thupl.29380167s0009.1.v3.1	Transcript	3_prime_UTR_variant	1534	NA	NA	NA	NA	NA
29380167_1424423	29380167	C	Thupl.29380167s0009	Thupl.29380167s0009.1.v3.1	Transcript	3_prime_UTR_variant	1551	NA	NA	NA	NA	NA
29380167_1968120	29380167	C	Thupl.29380167s0011	Thupl.29380167s0011.1.v3.1	Transcript	3_prime_UTR_variant	2939	NA	NA	NA	NA	NA
29380176_1532333	29380176	C	Thupl.29380176s0009	Thupl.29380176s0009.1.v3.1	Transcript	3_prime_UTR_variant	1379	NA	NA	NA	NA	NA
29380176_2991271	29380176	A	Thupl.29380176s0024	Thupl.29380176s0024.1.v3.1	Transcript	3_prime_UTR_variant	2288	NA	NA	NA	NA	NA
29380179_1495857	29380179	T	Thupl.29380179s0008	Thupl.29380179s0008.1.v3.1	Transcript	3_prime_UTR_variant	1558	NA	NA	NA	NA	NA
29380179_1495895	29380179	G	Thupl.29380179s0008	Thupl.29380179s0008.1.v3.1	Transcript	3_prime_UTR_variant	1596	NA	NA	NA	NA	NA
29380179_1710654	29380179	A	Thupl.29380179s0009	Thupl.29380179s0009.1.v3.1	Transcript	3_prime_UTR_variant	2166	NA	NA	NA	NA	NA
29380184_1073411	29380184	C	Thupl.29380184s0003	Thupl.29380184s0003.1.v3.1	Transcript	3_prime_UTR_variant	1046	NA	NA	NA	NA	NA
29380184_1073514	29380184	T	Thupl.29380184s0003	Thupl.29380184s0003.1.v3.1	Transcript	3_prime_UTR_variant	1149	NA	NA	NA	NA	NA
29380196_1228039	29380196	A	Thupl.29380196s0011	Thupl.29380196s0011.1.v3.1	Transcript	3_prime_UTR_variant	233	NA	NA	NA	NA	NA
29380196_1992225	29380196	C	Thupl.29380196s0014	Thupl.29380196s0014.1.v3.1	Transcript	3_prime_UTR_variant	5226	NA	NA	NA	NA	NA
29380210_265855	29380210	G	Thupl.29380210s0001	Thupl.29380210s0001.1.v3.1	Transcript	3_prime_UTR_variant	3738	NA	NA	NA	NA	NA
29380212_583837	29380212	T	Thupl.29380212s0005	Thupl.29380212s0005.1.v3.1	Transcript	3_prime_UTR_variant	3140	NA	NA	NA	NA	NA
29380212_3419151	29380212	C	Thupl.29380212s0009	Thupl.29380212s0009.1.v3.1	Transcript	3_prime_UTR_variant	969	NA	NA	NA	NA	NA
29380212_3419152	29380212	T	Thupl.29380212s0009	Thupl.29380212s0009.1.v3.1	Transcript	3_prime_UTR_variant	970	NA	NA	NA	NA	NA
29380212_3419380	29380212	C	Thupl.29380212s0009	Thupl.29380212s0009.1.v3.1	Transcript	3_prime_UTR_variant	1198	NA	NA	NA	NA	NA
29380212_3563396	29380212	C	Thupl.29380212s0010	Thupl.29380212s0010.1.v3.1	Transcript	3_prime_UTR_variant	5442	NA	NA	NA	NA	NA
29380217_2328839	29380217	A	Thupl.29380217s0017	Thupl.29380217s0017.1.v3.1	Transcript	3_prime_UTR_variant	2253	NA	NA	NA	NA	NA
29380217_2328884	29380217	A	Thupl.29380217s0017	Thupl.29380217s0017.1.v3.1	Transcript	3_prime_UTR_variant	2208	NA	NA	NA	NA	NA
29380217_2649597	29380217	C	Thupl.29380217s0018	Thupl.29380217s0018.2.v3.1	Transcript	3_prime_UTR_variant	1575	NA	NA	NA	NA	NA
29380217_5220773	29380217	A	Thupl.29380217s0030	Thupl.29380217s0030.1.v3.1	Transcript	3_prime_UTR_variant	1679	NA	NA	NA	NA	NA
29380219_466825	29380219	T	Thupl.29380219s0004	Thupl.29380219s0004.1.v3.1	Transcript	3_prime_UTR_variant	2224	NA	NA	NA	NA	NA
29380219_466930	29380219	T	Thupl.29380219s0004	Thupl.29380219s0004.1.v3.1	Transcript	3_prime_UTR_variant	2329	NA	NA	NA	NA	NA
29380219_657817	29380219	C	Thupl.29380219s0006	Thupl.29380219s0006.1.v3.1	Transcript	3_prime_UTR_variant	1429	NA	NA	NA	NA	NA
29380219_1534325	29380219	G	Thupl.29380219s0010	Thupl.29380219s0010.1.v3.1	Transcript	3_prime_UTR_variant	3213	NA	NA	NA	NA	NA
29380220_135814	29380220	C	Thupl.29380220s0001	Thupl.29380220s0001.1.v3.1	Transcript	3_prime_UTR_variant	2107	NA	NA	NA	NA	NA
29380222_333685	29380222	T	Thupl.29380222s0001	Thupl.29380222s0001.1.v3.1	Transcript	3_prime_UTR_variant	4710	NA	NA	NA	NA	NA
29380224_401882	29380224	A	Thupl.29380224s0001	Thupl.29380224s0001.1.v3.1	Transcript	3_prime_UTR_variant	3656	NA	NA	NA	NA	NA
29380238_1744605	29380238	T	Thupl.29380238s0008	Thupl.29380238s0008.1.v3.1	Transcript	3_prime_UTR_variant	7546	NA	NA	NA	NA	NA
29380241_828607	29380241	A	Thupl.29380241s0003	Thupl.29380241s0003.1.v3.1	Transcript	3_prime_UTR_variant	1632	NA	NA	NA	NA	NA
29380247_5950283	29380247	T	Thupl.29380247s0022	Thupl.29380247s0022.1.v3.1	Transcript	3_prime_UTR_variant	4397	NA	NA	NA	NA	NA
29380247_6237089	29380247	A	Thupl.29380247s0023	Thupl.29380247s0023.1.v3.1	Transcript	3_prime_UTR_variant	1771	NA	NA	NA	NA	NA
29380254_354520	29380254	A	Thupl.29380254s0007	Thupl.29380254s0007.1.v3.1	Transcript	3_prime_UTR_variant	409	NA	NA	NA	NA	NA
29380254_1561866	29380254	T	Thupl.29380254s0013	Thupl.29380254s0013.1.v3.1	Transcript	3_prime_UTR_variant	3317	NA	NA	NA	NA	NA
29380261_1063820	29380261	A	Thupl.29380261s0005	Thupl.29380261s0005.1.v3.1	Transcript	3_prime_UTR_variant	1941	NA	NA	NA	NA	NA
29380261_2481320	29380261	C	Thupl.29380261s0010	Thupl.29380261s0010.1.v3.1	Transcript	3_prime_UTR_variant	1155	NA	NA	NA	NA	NA
29380261_3886254	29380261	G	Thupl.29380261s0016	Thupl.29380261s0016.1.v3.1	Transcript	3_prime_UTR_variant	1126	NA	NA	NA	NA	NA
29380261_4537454	29380261	A	Thupl.29380261s0019	Thupl.29380261s0019.2.v3.1	Transcript	3_prime_UTR_variant	432	NA	NA	NA	NA	NA
29380261_4537492	29380261	C	Thupl.29380261s0019	Thupl.29380261s0019.2.v3.1	Transcript	3_prime_UTR_variant	394	NA	NA	NA	NA	NA
29380273_130285	29380273	T	Thupl.29380273s0001	Thupl.29380273s0001.1.v3.1	Transcript	3_prime_UTR_variant	2954	NA	NA	NA	NA	NA
29380276_969285	29380276	G	Thupl.29380276s0003	Thupl.29380276s0003.1.v3.1	Transcript	3_prime_UTR_variant	735	NA	NA	NA	NA	NA
29380278_694667	29380278	T	Thupl.29380278s0004	Thupl.29380278s0004.1.v3.1	Transcript	3_prime_UTR_variant	3978	NA	NA	NA	NA	NA
29380279_1034707	29380279	T	Thupl.29380279s0002	Thupl.29380279s0002.1.v3.1	Transcript	3_prime_UTR_variant	4706	NA	NA	NA	NA	NA
29380279_1034719	29380279	T	Thupl.29380279s0002	Thupl.29380279s0002.1.v3.1	Transcript	3_prime_UTR_variant	4718	NA	NA	NA	NA	NA
29380279_1034721	29380279	T	Thupl.29380279s0002	Thupl.29380279s0002.1.v3.1	Transcript	3_prime_UTR_variant	4720	NA	NA	NA	NA	NA
29380279_1034780	29380279	T	Thupl.29380279s0002	Thupl.29380279s0002.1.v3.1	Transcript	3_prime_UTR_variant	4779	NA	NA	NA	NA	NA
29380279_1034842	29380279	A	Thupl.29380279s0002	Thupl.29380279s0002.1.v3.1	Transcript	3_prime_UTR_variant	4841	NA	NA	NA	NA	NA
29380295_234442	29380295	C	Thupl.29380295s0002	Thupl.29380295s0002.1.v3.1	Transcript	3_prime_UTR_variant	1324	NA	NA	NA	NA	NA
29380295_234748	29380295	C	Thupl.29380295s0002	Thupl.29380295s0002.1.v3.1	Transcript	3_prime_UTR_variant	1018	NA	NA	NA	NA	NA
29380306_2836750	29380306	T	Thupl.29380306s0011	Thupl.29380306s0011.1.v3.1	Transcript	3_prime_UTR_variant	2366	NA	NA	NA	NA	NA
29380306_2836772	29380306	C	Thupl.29380306s0011	Thupl.29380306s0011.1.v3.1	Transcript	3_prime_UTR_variant	2388	NA	NA	NA	NA	NA
29380309_357202	29380309	A	Thupl.29380309s0001	Thupl.29380309s0001.1.v3.1	Transcript	3_prime_UTR_variant	4437	NA	NA	NA	NA	NA
29380322_248452	29380322	C	Thupl.29380322s0001	Thupl.29380322s0001.1.v3.1	Transcript	3_prime_UTR_variant	1192	NA	NA	NA	NA	NA
29380322_248525	29380322	C	Thupl.29380322s0001	Thupl.29380322s0001.1.v3.1	Transcript	3_prime_UTR_variant	1265	NA	NA	NA	NA	NA
29380325_3328191	29380325	G	Thupl.29380325s0024	Thupl.29380325s0024.1.v3.1	Transcript	3_prime_UTR_variant	1793	NA	NA	NA	NA	NA
29380325_3455819	29380325	T	Thupl.29380325s0025	Thupl.29380325s0025.1.v3.1	Transcript	3_prime_UTR_variant	2535	NA	NA	NA	NA	NA
29380327_748298	29380327	C	Thupl.29380327s0004	Thupl.29380327s0004.1.v3.1	Transcript	3_prime_UTR_variant	3973	NA	NA	NA	NA	NA
29380327_748366	29380327	G	Thupl.29380327s0004	Thupl.29380327s0004.1.v3.1	Transcript	3_prime_UTR_variant	3905	NA	NA	NA	NA	NA
29380327_748382	29380327	A	Thupl.29380327s0004	Thupl.29380327s0004.1.v3.1	Transcript	3_prime_UTR_variant	3889	NA	NA	NA	NA	NA
29380339_1686655	29380339	C	Thupl.29380339s0013	Thupl.29380339s0013.1.v3.1	Transcript	3_prime_UTR_variant	356	NA	NA	NA	NA	NA
29380340_272575	29380340	G	Thupl.29380340s0001	Thupl.29380340s0001.1.v3.1	Transcript	3_prime_UTR_variant	749	NA	NA	NA	NA	NA
29380345_104474	29380345	C	Thupl.29380345s0001	Thupl.29380345s0001.1.v3.1	Transcript	3_prime_UTR_variant	2525	NA	NA	NA	NA	NA
29380345_104530	29380345	C	Thupl.29380345s0001	Thupl.29380345s0001.1.v3.1	Transcript	3_prime_UTR_variant	2469	NA	NA	NA	NA	NA
29380345_6573449	29380345	C	Thupl.29380345s0032	Thupl.29380345s0032.1.v3.1	Transcript	3_prime_UTR_variant	1112	NA	NA	NA	NA	NA
29380345_6573483	29380345	C	Thupl.29380345s0032	Thupl.29380345s0032.1.v3.1	Transcript	3_prime_UTR_variant	1146	NA	NA	NA	NA	NA
29380345_6573520	29380345	G	Thupl.29380345s0032	Thupl.29380345s0032.1.v3.1	Transcript	3_prime_UTR_variant	1183	NA	NA	NA	NA	NA
29380345_6573557	29380345	A	Thupl.29380345s0032	Thupl.29380345s0032.1.v3.1	Transcript	3_prime_UTR_variant	1220	NA	NA	NA	NA	NA
29380345_6573712	29380345	T	Thupl.29380345s0032	Thupl.29380345s0032.1.v3.1	Transcript	3_prime_UTR_variant	1375	NA	NA	NA	NA	NA
29380345_7366910	29380345	C	Thupl.29380345s0035	Thupl.29380345s0035.1.v3.1	Transcript	3_prime_UTR_variant	1444	NA	NA	NA	NA	NA
29380345_8785852	29380345	G	Thupl.29380345s0039	Thupl.29380345s0039.1.v3.1	Transcript	3_prime_UTR_variant	1643	NA	NA	NA	NA	NA
29380345_13933658	29380345	C	Thupl.29380345s0052	Thupl.29380345s0052.1.v3.1	Transcript	3_prime_UTR_variant	937	NA	NA	NA	NA	NA
29380345_13933682	29380345	C	Thupl.29380345s0052	Thupl.29380345s0052.1.v3.1	Transcript	3_prime_UTR_variant	961	NA	NA	NA	NA	NA
29380345_13933732	29380345	G	Thupl.29380345s0052	Thupl.29380345s0052.1.v3.1	Transcript	3_prime_UTR_variant	1011	NA	NA	NA	NA	NA
29380345_13933788	29380345	C	Thupl.29380345s0052	Thupl.29380345s0052.1.v3.1	Transcript	3_prime_UTR_variant	1067	NA	NA	NA	NA	NA
29380350_254616	29380350	A	Thupl.29380350s0002	Thupl.29380350s0002.1.v3.1	Transcript	3_prime_UTR_variant	1867	NA	NA	NA	NA	NA
29380350_254717	29380350	A	Thupl.29380350s0002	Thupl.29380350s0002.1.v3.1	Transcript	3_prime_UTR_variant	1766	NA	NA	NA	NA	NA
29380350_514017	29380350	T	Thupl.29380350s0003	Thupl.29380350s0003.1.v3.1	Transcript	3_prime_UTR_variant	776	NA	NA	NA	NA	NA
29380350_514023	29380350	G	Thupl.29380350s0003	Thupl.29380350s0003.1.v3.1	Transcript	3_prime_UTR_variant	782	NA	NA	NA	NA	NA
29380353_344944	29380353	A	Thupl.29380353s0002	Thupl.29380353s0002.1.v3.1	Transcript	3_prime_UTR_variant	2725	NA	NA	NA	NA	NA
29380353_345009	29380353	A	Thupl.29380353s0002	Thupl.29380353s0002.1.v3.1	Transcript	3_prime_UTR_variant	2660	NA	NA	NA	NA	NA
29380353_345527	29380353	C	Thupl.29380353s0002	Thupl.29380353s0002.1.v3.1	Transcript	3_prime_UTR_variant	2142	NA	NA	NA	NA	NA
29380353_345543	29380353	G	Thupl.29380353s0002	Thupl.29380353s0002.1.v3.1	Transcript	3_prime_UTR_variant	2126	NA	NA	NA	NA	NA
29380355_4629383	29380355	A	Thupl.29380355s0011	Thupl.29380355s0011.1.v3.1	Transcript	3_prime_UTR_variant	3339	NA	NA	NA	NA	NA
29380357_690572	29380357	C	Thupl.29380357s0002	Thupl.29380357s0002.1.v3.1	Transcript	3_prime_UTR_variant	2438	NA	NA	NA	NA	NA
29380358_2593555	29380358	C	Thupl.29380358s0013	Thupl.29380358s0013.1.v3.1	Transcript	3_prime_UTR_variant	4316	NA	NA	NA	NA	NA
29380361_225244	29380361	A	Thupl.29380361s0002	Thupl.29380361s0002.1.v3.1	Transcript	3_prime_UTR_variant	1252	NA	NA	NA	NA	NA
29380364_1222275	29380364	G	Thupl.29380364s0003	Thupl.29380364s0003.1.v3.1	Transcript	3_prime_UTR_variant	2424	NA	NA	NA	NA	NA
29380364_1486492	29380364	A	Thupl.29380364s0005	Thupl.29380364s0005.1.v3.1	Transcript	3_prime_UTR_variant	1283	NA	NA	NA	NA	NA
29380367_168859	29380367	C	Thupl.29380367s0001	Thupl.29380367s0001.1.v3.1	Transcript	3_prime_UTR_variant	1921	NA	NA	NA	NA	NA
29380367_543162	29380367	C	Thupl.29380367s0002	Thupl.29380367s0002.1.v3.1	Transcript	3_prime_UTR_variant	1722	NA	NA	NA	NA	NA
29380367_543281	29380367	C	Thupl.29380367s0002	Thupl.29380367s0002.1.v3.1	Transcript	3_prime_UTR_variant	1841	NA	NA	NA	NA	NA
29380368_161371	29380368	C	Thupl.29380368s0001	Thupl.29380368s0001.1.v3.1	Transcript	3_prime_UTR_variant	1282	NA	NA	NA	NA	NA
29380368_161384	29380368	T	Thupl.29380368s0001	Thupl.29380368s0001.1.v3.1	Transcript	3_prime_UTR_variant	1269	NA	NA	NA	NA	NA
29380368_555468	29380368	G	Thupl.29380368s0002	Thupl.29380368s0002.1.v3.1	Transcript	3_prime_UTR_variant	874	NA	NA	NA	NA	NA
29380368_555470	29380368	G	Thupl.29380368s0002	Thupl.29380368s0002.1.v3.1	Transcript	3_prime_UTR_variant	876	NA	NA	NA	NA	NA
29380374_4380314	29380374	G	Thupl.29380374s0007	Thupl.29380374s0007.1.v3.1	Transcript	3_prime_UTR_variant	1582	NA	NA	NA	NA	NA
29380377_1061954	29380377	C	Thupl.29380377s0011	Thupl.29380377s0011.1.v3.1	Transcript	3_prime_UTR_variant	5154	NA	NA	NA	NA	NA
29380377_1061980	29380377	C	Thupl.29380377s0011	Thupl.29380377s0011.1.v3.1	Transcript	3_prime_UTR_variant	5128	NA	NA	NA	NA	NA
29380377_1381031	29380377	C	Thupl.29380377s0014	Thupl.29380377s0014.1.v3.1	Transcript	3_prime_UTR_variant	3037	NA	NA	NA	NA	NA
29380377_1381032	29380377	T	Thupl.29380377s0014	Thupl.29380377s0014.1.v3.1	Transcript	3_prime_UTR_variant	3036	NA	NA	NA	NA	NA
29380377_1381098	29380377	C	Thupl.29380377s0014	Thupl.29380377s0014.1.v3.1	Transcript	3_prime_UTR_variant	2970	NA	NA	NA	NA	NA
29380378_1261619	29380378	T	Thupl.29380378s0003	Thupl.29380378s0003.1.v3.1	Transcript	3_prime_UTR_variant	969	NA	NA	NA	NA	NA
29380378_1261639	29380378	T	Thupl.29380378s0003	Thupl.29380378s0003.1.v3.1	Transcript	3_prime_UTR_variant	989	NA	NA	NA	NA	NA
29380378_1261653	29380378	A	Thupl.29380378s0003	Thupl.29380378s0003.1.v3.1	Transcript	3_prime_UTR_variant	1003	NA	NA	NA	NA	NA
29380378_1261691	29380378	C	Thupl.29380378s0003	Thupl.29380378s0003.1.v3.1	Transcript	3_prime_UTR_variant	1041	NA	NA	NA	NA	NA
29380378_1261928	29380378	G	Thupl.29380378s0003	Thupl.29380378s0003.1.v3.1	Transcript	3_prime_UTR_variant	1278	NA	NA	NA	NA	NA
29380378_1262061	29380378	A	Thupl.29380378s0003	Thupl.29380378s0003.1.v3.1	Transcript	3_prime_UTR_variant	1411	NA	NA	NA	NA	NA
29380398_1103420	29380398	G	Thupl.29380398s0006	Thupl.29380398s0006.1.v3.1	Transcript	3_prime_UTR_variant	1332	NA	NA	NA	NA	NA
29380398_1889642	29380398	C	Thupl.29380398s0013	Thupl.29380398s0013.1.v3.1	Transcript	3_prime_UTR_variant	2838	NA	NA	NA	NA	NA
29380405_238984	29380405	T	Thupl.29380405s0001	Thupl.29380405s0001.1.v3.1	Transcript	3_prime_UTR_variant	1206	NA	NA	NA	NA	NA
29380405_238985	29380405	T	Thupl.29380405s0001	Thupl.29380405s0001.1.v3.1	Transcript	3_prime_UTR_variant	1207	NA	NA	NA	NA	NA
29380405_723195	29380405	T	Thupl.29380405s0005	Thupl.29380405s0005.1.v3.1	Transcript	3_prime_UTR_variant	901	NA	NA	NA	NA	NA
29380411_405148	29380411	A	Thupl.29380411s0009	Thupl.29380411s0009.1.v3.1	Transcript	3_prime_UTR_variant	821	NA	NA	NA	NA	NA
29380411_1135336	29380411	G	Thupl.29380411s0014	Thupl.29380411s0014.1.v3.1	Transcript	3_prime_UTR_variant	2871	NA	NA	NA	NA	NA
29380411_2225474	29380411	T	Thupl.29380411s0017	Thupl.29380411s0017.1.v3.1	Transcript	3_prime_UTR_variant	2555	NA	NA	NA	NA	NA
29380411_3271917	29380411	T	Thupl.29380411s0022	Thupl.29380411s0022.1.v3.1	Transcript	3_prime_UTR_variant	886	NA	NA	NA	NA	NA
29380411_3271933	29380411	G	Thupl.29380411s0022	Thupl.29380411s0022.1.v3.1	Transcript	3_prime_UTR_variant	870	NA	NA	NA	NA	NA
29380415_1730940	29380415	C	Thupl.29380415s0005	Thupl.29380415s0005.1.v3.1	Transcript	3_prime_UTR_variant	1547	NA	NA	NA	NA	NA
29380415_1731050	29380415	C	Thupl.29380415s0005	Thupl.29380415s0005.1.v3.1	Transcript	3_prime_UTR_variant	1437	NA	NA	NA	NA	NA
29380422_3444274	29380422	G	Thupl.29380422s0016	Thupl.29380422s0016.1.v3.1	Transcript	3_prime_UTR_variant	3800	NA	NA	NA	NA	NA
29380422_5827301	29380422	T	Thupl.29380422s0024	Thupl.29380422s0024.1.v3.1	Transcript	3_prime_UTR_variant	2304	NA	NA	NA	NA	NA
29380422_7137167	29380422	A	Thupl.29380422s0033	Thupl.29380422s0033.1.v3.1	Transcript	3_prime_UTR_variant	2220	NA	NA	NA	NA	NA
29380422_7227316	29380422	C	Thupl.29380422s0034	Thupl.29380422s0034.1.v3.1	Transcript	3_prime_UTR_variant	1290	NA	NA	NA	NA	NA
29380423_20396	29380423	T	Thupl.29380423s0002	Thupl.29380423s0002.1.v3.1	Transcript	3_prime_UTR_variant	4122	NA	NA	NA	NA	NA
29380423_186662	29380423	G	Thupl.29380423s0004	Thupl.29380423s0004.1.v3.1	Transcript	3_prime_UTR_variant	2799	NA	NA	NA	NA	NA
29380432_281901	29380432	A	Thupl.29380432s0003	Thupl.29380432s0003.1.v3.1	Transcript	3_prime_UTR_variant	1673	NA	NA	NA	NA	NA
29380433_288824	29380433	C	Thupl.29380433s0001	Thupl.29380433s0001.1.v3.1	Transcript	3_prime_UTR_variant	2064	NA	NA	NA	NA	NA
29380433_288889	29380433	A	Thupl.29380433s0001	Thupl.29380433s0001.1.v3.1	Transcript	3_prime_UTR_variant	1999	NA	NA	NA	NA	NA
29380433_629228	29380433	C	Thupl.29380433s0003	Thupl.29380433s0003.1.v3.1	Transcript	3_prime_UTR_variant	3769	NA	NA	NA	NA	NA
29380433_629341	29380433	G	Thupl.29380433s0003	Thupl.29380433s0003.1.v3.1	Transcript	3_prime_UTR_variant	3656	NA	NA	NA	NA	NA
29380434_1317650	29380434	A	Thupl.29380434s0005	Thupl.29380434s0005.1.v3.1	Transcript	3_prime_UTR_variant	1593	NA	NA	NA	NA	NA
29380434_1317656	29380434	C	Thupl.29380434s0005	Thupl.29380434s0005.1.v3.1	Transcript	3_prime_UTR_variant	1599	NA	NA	NA	NA	NA
29380434_1317693	29380434	T	Thupl.29380434s0005	Thupl.29380434s0005.1.v3.1	Transcript	3_prime_UTR_variant	1636	NA	NA	NA	NA	NA
29380434_1317702	29380434	G	Thupl.29380434s0005	Thupl.29380434s0005.1.v3.1	Transcript	3_prime_UTR_variant	1645	NA	NA	NA	NA	NA
29380437_2806129	29380437	A	Thupl.29380437s0008	Thupl.29380437s0008.1.v3.1	Transcript	3_prime_UTR_variant	1559	NA	NA	NA	NA	NA
29380438_1234141	29380438	C	Thupl.29380438s0011	Thupl.29380438s0011.1.v3.1	Transcript	3_prime_UTR_variant	1382	NA	NA	NA	NA	NA
29380441_739056	29380441	G	Thupl.29380441s0005	Thupl.29380441s0005.1.v3.1	Transcript	3_prime_UTR_variant	1370	NA	NA	NA	NA	NA
29380441_821195	29380441	G	Thupl.29380441s0008	Thupl.29380441s0008.1.v3.1	Transcript	3_prime_UTR_variant	1199	NA	NA	NA	NA	NA
29380447_1284642	29380447	T	Thupl.29380447s0004	Thupl.29380447s0004.1.v3.1	Transcript	3_prime_UTR_variant	1893	NA	NA	NA	NA	NA
29380447_1284707	29380447	A	Thupl.29380447s0004	Thupl.29380447s0004.1.v3.1	Transcript	3_prime_UTR_variant	1958	NA	NA	NA	NA	NA
29380449_2838096	29380449	G	Thupl.29380449s0011	Thupl.29380449s0011.1.v3.1	Transcript	3_prime_UTR_variant	1788	NA	NA	NA	NA	NA
29380449_2838104	29380449	T	Thupl.29380449s0011	Thupl.29380449s0011.1.v3.1	Transcript	3_prime_UTR_variant	1780	NA	NA	NA	NA	NA
29380449_2838160	29380449	G	Thupl.29380449s0011	Thupl.29380449s0011.1.v3.1	Transcript	3_prime_UTR_variant	1724	NA	NA	NA	NA	NA
29380450_263082	29380450	G	Thupl.29380450s0001	Thupl.29380450s0001.1.v3.1	Transcript	3_prime_UTR_variant	1731	NA	NA	NA	NA	NA
29380450_263576	29380450	G	Thupl.29380450s0001	Thupl.29380450s0001.1.v3.1	Transcript	3_prime_UTR_variant	2225	NA	NA	NA	NA	NA
29380466_560799	29380466	A	Thupl.29380466s0005	Thupl.29380466s0005.1.v3.1	Transcript	3_prime_UTR_variant	862	NA	NA	NA	NA	NA
29380468_1891748	29380468	T	Thupl.29380468s0008	Thupl.29380468s0008.1.v3.1	Transcript	3_prime_UTR_variant	1878	NA	NA	NA	NA	NA
29380468_1979819	29380468	C	Thupl.29380468s0010	Thupl.29380468s0010.1.v3.1	Transcript	3_prime_UTR_variant	1084	NA	NA	NA	NA	NA
29380470_654691	29380470	C	Thupl.29380470s0005	Thupl.29380470s0005.1.v3.1	Transcript	3_prime_UTR_variant	3220	NA	NA	NA	NA	NA
29380474_1086894	29380474	T	Thupl.29380474s0003	Thupl.29380474s0003.1.v3.1	Transcript	3_prime_UTR_variant	1063	NA	NA	NA	NA	NA
29380477_1479794	29380477	C	Thupl.29380477s0011	Thupl.29380477s0011.1.v3.1	Transcript	3_prime_UTR_variant	3389	NA	NA	NA	NA	NA
29380477_1479798	29380477	G	Thupl.29380477s0011	Thupl.29380477s0011.1.v3.1	Transcript	3_prime_UTR_variant	3385	NA	NA	NA	NA	NA
29380478_367830	29380478	T	Thupl.29380478s0001	Thupl.29380478s0001.1.v3.1	Transcript	3_prime_UTR_variant	1537	NA	NA	NA	NA	NA
29380479_838931	29380479	C	Thupl.29380479s0002	Thupl.29380479s0002.1.v3.1	Transcript	3_prime_UTR_variant	2017	NA	NA	NA	NA	NA
29380487_2014534	29380487	C	Thupl.29380487s0015	Thupl.29380487s0015.1.v3.1	Transcript	3_prime_UTR_variant	2487	NA	NA	NA	NA	NA
29380489_2217821	29380489	G	Thupl.29380489s0007	Thupl.29380489s0007.1.v3.1	Transcript	3_prime_UTR_variant	1952	NA	NA	NA	NA	NA
29380492_1025222	29380492	T	Thupl.29380492s0006	Thupl.29380492s0006.1.v3.1	Transcript	3_prime_UTR_variant	3286	NA	NA	NA	NA	NA
29380492_2370824	29380492	T	Thupl.29380492s0012	Thupl.29380492s0012.1.v3.1	Transcript	3_prime_UTR_variant	1739	NA	NA	NA	NA	NA
29380492_2370835	29380492	A	Thupl.29380492s0012	Thupl.29380492s0012.1.v3.1	Transcript	3_prime_UTR_variant	1728	NA	NA	NA	NA	NA
29380492_2370924	29380492	G	Thupl.29380492s0012	Thupl.29380492s0012.1.v3.1	Transcript	3_prime_UTR_variant	1639	NA	NA	NA	NA	NA
29380492_4602048	29380492	T	Thupl.29380492s0033	Thupl.29380492s0033.1.v3.1	Transcript	3_prime_UTR_variant	4685	NA	NA	NA	NA	NA
29380500_407041	29380500	A	Thupl.29380500s0003	Thupl.29380500s0003.1.v3.1	Transcript	3_prime_UTR_variant	1065	NA	NA	NA	NA	NA
29380502_515506	29380502	G	Thupl.29380502s0005	Thupl.29380502s0005.1.v3.1	Transcript	3_prime_UTR_variant	3483	NA	NA	NA	NA	NA
29380502_515610	29380502	T	Thupl.29380502s0005	Thupl.29380502s0005.1.v3.1	Transcript	3_prime_UTR_variant	3379	NA	NA	NA	NA	NA
29380510_1275373	29380510	T	Thupl.29380510s0003	Thupl.29380510s0003.1.v3.1	Transcript	3_prime_UTR_variant	770	NA	NA	NA	NA	NA
29380513_218934	29380513	C	Thupl.29380513s0001	Thupl.29380513s0001.1.v3.1	Transcript	3_prime_UTR_variant	1785	NA	NA	NA	NA	NA
29380514_345645	29380514	C	Thupl.29380514s0001	Thupl.29380514s0001.1.v3.1	Transcript	3_prime_UTR_variant	2012	NA	NA	NA	NA	NA
29380514_345646	29380514	A	Thupl.29380514s0001	Thupl.29380514s0001.1.v3.1	Transcript	3_prime_UTR_variant	2013	NA	NA	NA	NA	NA
29380523_3309780	29380523	T	Thupl.29380523s0020	Thupl.29380523s0020.1.v3.1	Transcript	3_prime_UTR_variant	1881	NA	NA	NA	NA	NA
29380527_107393	29380527	G	Thupl.29380527s0003	Thupl.29380527s0003.3.v3.1	Transcript	3_prime_UTR_variant	2593	NA	NA	NA	NA	NA
29380527_461808	29380527	T	Thupl.29380527s0005	Thupl.29380527s0005.1.v3.1	Transcript	3_prime_UTR_variant	1532	NA	NA	NA	NA	NA
29380534_244124	29380534	T	Thupl.29380534s0001	Thupl.29380534s0001.1.v3.1	Transcript	3_prime_UTR_variant	1195	NA	NA	NA	NA	NA
29380540_92148	29380540	C	Thupl.29380540s0001	Thupl.29380540s0001.1.v3.1	Transcript	3_prime_UTR_variant	2105	NA	NA	NA	NA	NA
29380540_92169	29380540	T	Thupl.29380540s0001	Thupl.29380540s0001.1.v3.1	Transcript	3_prime_UTR_variant	2084	NA	NA	NA	NA	NA
29380541_1121990	29380541	T	Thupl.29380541s0005	Thupl.29380541s0005.1.v3.1	Transcript	3_prime_UTR_variant	2453	NA	NA	NA	NA	NA
29380546_108279	29380546	A	Thupl.29380546s0002	Thupl.29380546s0002.1.v3.1	Transcript	3_prime_UTR_variant	2526	NA	NA	NA	NA	NA
29380546_728579	29380546	G	Thupl.29380546s0005	Thupl.29380546s0005.1.v3.1	Transcript	3_prime_UTR_variant	887	NA	NA	NA	NA	NA
29380546_728602	29380546	A	Thupl.29380546s0005	Thupl.29380546s0005.1.v3.1	Transcript	3_prime_UTR_variant	864	NA	NA	NA	NA	NA
29380546_924980	29380546	A	Thupl.29380546s0008	Thupl.29380546s0008.1.v3.1	Transcript	3_prime_UTR_variant	843	NA	NA	NA	NA	NA
29380548_1465461	29380548	C	Thupl.29380548s0009	Thupl.29380548s0009.1.v3.1	Transcript	3_prime_UTR_variant	664	NA	NA	NA	NA	NA
29380548_1465556	29380548	A	Thupl.29380548s0009	Thupl.29380548s0009.1.v3.1	Transcript	3_prime_UTR_variant	569	NA	NA	NA	NA	NA
29380548_1465561	29380548	C	Thupl.29380548s0009	Thupl.29380548s0009.1.v3.1	Transcript	3_prime_UTR_variant	564	NA	NA	NA	NA	NA
29380548_1465578	29380548	C	Thupl.29380548s0009	Thupl.29380548s0009.1.v3.1	Transcript	3_prime_UTR_variant	547	NA	NA	NA	NA	NA
29380562_1617170	29380562	T	Thupl.29380562s0011	Thupl.29380562s0011.1.v3.1	Transcript	3_prime_UTR_variant	1113	NA	NA	NA	NA	NA
29380567_194366	29380567	A	Thupl.29380567s0003	Thupl.29380567s0003.1.v3.1	Transcript	3_prime_UTR_variant	1511	NA	NA	NA	NA	NA
29380568_133280	29380568	C	Thupl.29380568s0002	Thupl.29380568s0002.1.v3.1	Transcript	3_prime_UTR_variant	1091	NA	NA	NA	NA	NA
29380568_133295	29380568	T	Thupl.29380568s0002	Thupl.29380568s0002.1.v3.1	Transcript	3_prime_UTR_variant	1076	NA	NA	NA	NA	NA
29380568_133311	29380568	C	Thupl.29380568s0002	Thupl.29380568s0002.1.v3.1	Transcript	3_prime_UTR_variant	1060	NA	NA	NA	NA	NA
29380569_447441	29380569	T	Thupl.29380569s0003	Thupl.29380569s0003.1.v3.1	Transcript	3_prime_UTR_variant	1673	NA	NA	NA	NA	NA
29380571_124814	29380571	G	Thupl.29380571s0002	Thupl.29380571s0002.1.v3.1	Transcript	3_prime_UTR_variant	2198	NA	NA	NA	NA	NA
29380572_173632	29380572	T	Thupl.29380572s0001	Thupl.29380572s0001.1.v3.1	Transcript	3_prime_UTR_variant	657	NA	NA	NA	NA	NA
29380572_537692	29380572	C	Thupl.29380572s0003	Thupl.29380572s0003.1.v3.1	Transcript	3_prime_UTR_variant	3843	NA	NA	NA	NA	NA
29380574_1152093	29380574	T	Thupl.29380574s0009	Thupl.29380574s0009.1.v3.1	Transcript	3_prime_UTR_variant	810	NA	NA	NA	NA	NA
29380574_1152099	29380574	G	Thupl.29380574s0009	Thupl.29380574s0009.1.v3.1	Transcript	3_prime_UTR_variant	804	NA	NA	NA	NA	NA
29380582_438406	29380582	A	Thupl.29380582s0005	Thupl.29380582s0005.1.v3.1	Transcript	3_prime_UTR_variant	1888	NA	NA	NA	NA	NA
29380586_61815	29380586	A	Thupl.29380586s0001	Thupl.29380586s0001.1.v3.1	Transcript	3_prime_UTR_variant	827	NA	NA	NA	NA	NA
29380600_271199	29380600	A	Thupl.29380600s0004	Thupl.29380600s0004.1.v3.1	Transcript	3_prime_UTR_variant	1212	NA	NA	NA	NA	NA
29380600_271211	29380600	A	Thupl.29380600s0004	Thupl.29380600s0004.1.v3.1	Transcript	3_prime_UTR_variant	1200	NA	NA	NA	NA	NA
29380600_271234	29380600	A	Thupl.29380600s0004	Thupl.29380600s0004.1.v3.1	Transcript	3_prime_UTR_variant	1177	NA	NA	NA	NA	NA
29380604_905724	29380604	G	Thupl.29380604s0005	Thupl.29380604s0005.1.v3.1	Transcript	3_prime_UTR_variant	1627	NA	NA	NA	NA	NA
29380611_175749	29380611	G	Thupl.29380611s0004	Thupl.29380611s0004.1.v3.1	Transcript	3_prime_UTR_variant	2142	NA	NA	NA	NA	NA
29380612_985626	29380612	G	Thupl.29380612s0004	Thupl.29380612s0004.1.v3.1	Transcript	3_prime_UTR_variant	2006	NA	NA	NA	NA	NA
29380612_985661	29380612	G	Thupl.29380612s0004	Thupl.29380612s0004.1.v3.1	Transcript	3_prime_UTR_variant	1971	NA	NA	NA	NA	NA
29380612_985672	29380612	T	Thupl.29380612s0004	Thupl.29380612s0004.1.v3.1	Transcript	3_prime_UTR_variant	1960	NA	NA	NA	NA	NA
29380616_613488	29380616	T	Thupl.29380616s0004	Thupl.29380616s0004.1.v3.1	Transcript	3_prime_UTR_variant	2129	NA	NA	NA	NA	NA
29380620_2849503	29380620	C	Thupl.29380620s0010	Thupl.29380620s0010.1.v3.1	Transcript	3_prime_UTR_variant	3052	NA	NA	NA	NA	NA
29380620_3528886	29380620	T	Thupl.29380620s0011	Thupl.29380620s0011.1.v3.1	Transcript	3_prime_UTR_variant	2116	NA	NA	NA	NA	NA
29380620_3695016	29380620	C	Thupl.29380620s0013	Thupl.29380620s0013.1.v3.1	Transcript	3_prime_UTR_variant	1177	NA	NA	NA	NA	NA
29380620_3695019	29380620	T	Thupl.29380620s0013	Thupl.29380620s0013.1.v3.1	Transcript	3_prime_UTR_variant	1174	NA	NA	NA	NA	NA
29380620_3695047	29380620	A	Thupl.29380620s0013	Thupl.29380620s0013.1.v3.1	Transcript	3_prime_UTR_variant	1146	NA	NA	NA	NA	NA
29380620_3945439	29380620	G	Thupl.29380620s0015	Thupl.29380620s0015.1.v3.1	Transcript	3_prime_UTR_variant	1237	NA	NA	NA	NA	NA
29380628_431181	29380628	C	Thupl.29380628s0002	Thupl.29380628s0002.1.v3.1	Transcript	3_prime_UTR_variant	1849	NA	NA	NA	NA	NA
29380628_431285	29380628	G	Thupl.29380628s0002	Thupl.29380628s0002.1.v3.1	Transcript	3_prime_UTR_variant	1745	NA	NA	NA	NA	NA
29380628_663903	29380628	A	Thupl.29380628s0005	Thupl.29380628s0005.1.v3.1	Transcript	3_prime_UTR_variant	1157	NA	NA	NA	NA	NA
29380633_1961692	29380633	T	Thupl.29380633s0008	Thupl.29380633s0008.1.v3.1	Transcript	3_prime_UTR_variant	5058	NA	NA	NA	NA	NA
29380636_933718	29380636	T	Thupl.29380636s0003	Thupl.29380636s0003.1.v3.1	Transcript	3_prime_UTR_variant	2872	NA	NA	NA	NA	NA
29380684_238570	29380684	G	Thupl.29380684s0001	Thupl.29380684s0001.1.v3.1	Transcript	3_prime_UTR_variant	2596	NA	NA	NA	NA	NA
29380684_1174635	29380684	A	Thupl.29380684s0007	Thupl.29380684s0007.1.v3.1	Transcript	3_prime_UTR_variant	3367	NA	NA	NA	NA	NA
29380684_1174963	29380684	A	Thupl.29380684s0007	Thupl.29380684s0007.1.v3.1	Transcript	3_prime_UTR_variant	3695	NA	NA	NA	NA	NA
29380684_2661739	29380684	T	Thupl.29380684s0012	Thupl.29380684s0012.1.v3.1	Transcript	3_prime_UTR_variant	3972	NA	NA	NA	NA	NA
29380685_1146028	29380685	C	Thupl.29380685s0006	Thupl.29380685s0006.1.v3.1	Transcript	3_prime_UTR_variant	2854	NA	NA	NA	NA	NA
29380685_1795542	29380685	C	Thupl.29380685s0011	Thupl.29380685s0011.1.v3.1	Transcript	3_prime_UTR_variant	2820	NA	NA	NA	NA	NA
29380685_1795587	29380685	A	Thupl.29380685s0011	Thupl.29380685s0011.1.v3.1	Transcript	3_prime_UTR_variant	2865	NA	NA	NA	NA	NA
29380685_1885044	29380685	C	Thupl.29380685s0012	Thupl.29380685s0012.1.v3.1	Transcript	3_prime_UTR_variant	1797	NA	NA	NA	NA	NA
29380686_1224792	29380686	C	Thupl.29380686s0009	Thupl.29380686s0009.1.v3.1	Transcript	3_prime_UTR_variant	1020	NA	NA	NA	NA	NA
29380692_3050031	29380692	A	Thupl.29380692s0013	Thupl.29380692s0013.1.v3.1	Transcript	3_prime_UTR_variant	2259	NA	NA	NA	NA	NA
29380692_3050103	29380692	T	Thupl.29380692s0013	Thupl.29380692s0013.1.v3.1	Transcript	3_prime_UTR_variant	2187	NA	NA	NA	NA	NA
29380692_3050124	29380692	C	Thupl.29380692s0013	Thupl.29380692s0013.1.v3.1	Transcript	3_prime_UTR_variant	2166	NA	NA	NA	NA	NA
29380692_3318996	29380692	A	Thupl.29380692s0014	Thupl.29380692s0014.1.v3.1	Transcript	3_prime_UTR_variant	2304	NA	NA	NA	NA	NA
29380697_572336	29380697	G	Thupl.29380697s0006	Thupl.29380697s0006.1.v3.1	Transcript	3_prime_UTR_variant	1543	NA	NA	NA	NA	NA
29380710_1567381	29380710	C	Thupl.29380710s0010	Thupl.29380710s0010.1.v3.1	Transcript	3_prime_UTR_variant	1351	NA	NA	NA	NA	NA
29380710_1567391	29380710	A	Thupl.29380710s0010	Thupl.29380710s0010.1.v3.1	Transcript	3_prime_UTR_variant	1341	NA	NA	NA	NA	NA
29380710_1813097	29380710	C	Thupl.29380710s0012	Thupl.29380710s0012.1.v3.1	Transcript	3_prime_UTR_variant	1499	NA	NA	NA	NA	NA
29380712_2285216	29380712	G	Thupl.29380712s0014	Thupl.29380712s0014.2.v3.1	Transcript	3_prime_UTR_variant	648	NA	NA	NA	NA	NA
29380712_2285224	29380712	T	Thupl.29380712s0014	Thupl.29380712s0014.2.v3.1	Transcript	3_prime_UTR_variant	640	NA	NA	NA	NA	NA
29380712_2818315	29380712	G	Thupl.29380712s0019	Thupl.29380712s0019.1.v3.1	Transcript	3_prime_UTR_variant	3604	NA	NA	NA	NA	NA
29380718_285753	29380718	A	Thupl.29380718s0001	Thupl.29380718s0001.1.v3.1	Transcript	3_prime_UTR_variant	1417	NA	NA	NA	NA	NA
29380719_1856691	29380719	A	Thupl.29380719s0009	Thupl.29380719s0009.1.v3.1	Transcript	3_prime_UTR_variant	839	NA	NA	NA	NA	NA
29380719_1856733	29380719	T	Thupl.29380719s0009	Thupl.29380719s0009.1.v3.1	Transcript	3_prime_UTR_variant	881	NA	NA	NA	NA	NA
29380719_1856747	29380719	G	Thupl.29380719s0009	Thupl.29380719s0009.1.v3.1	Transcript	3_prime_UTR_variant	895	NA	NA	NA	NA	NA
29380720_457807	29380720	G	Thupl.29380720s0004	Thupl.29380720s0004.1.v3.1	Transcript	3_prime_UTR_variant	1717	NA	NA	NA	NA	NA
29380720_457822	29380720	G	Thupl.29380720s0004	Thupl.29380720s0004.1.v3.1	Transcript	3_prime_UTR_variant	1702	NA	NA	NA	NA	NA
29380725_1017295	29380725	G	Thupl.29380725s0003	Thupl.29380725s0003.1.v3.1	Transcript	3_prime_UTR_variant	816	NA	NA	NA	NA	NA
29380725_1017419	29380725	A	Thupl.29380725s0003	Thupl.29380725s0003.1.v3.1	Transcript	3_prime_UTR_variant	940	NA	NA	NA	NA	NA
29380728_828066	29380728	G	Thupl.29380728s0007	Thupl.29380728s0007.1.v3.1	Transcript	3_prime_UTR_variant	1283	NA	NA	NA	NA	NA
29380728_1179557	29380728	G	Thupl.29380728s0010	Thupl.29380728s0010.1.v3.1	Transcript	3_prime_UTR_variant	2998	NA	NA	NA	NA	NA
29380728_1179582	29380728	G	Thupl.29380728s0010	Thupl.29380728s0010.1.v3.1	Transcript	3_prime_UTR_variant	3023	NA	NA	NA	NA	NA
29380730_222657	29380730	A	Thupl.29380730s0002	Thupl.29380730s0002.1.v3.1	Transcript	3_prime_UTR_variant	1197	NA	NA	NA	NA	NA
29380730_222665	29380730	T	Thupl.29380730s0002	Thupl.29380730s0002.1.v3.1	Transcript	3_prime_UTR_variant	1205	NA	NA	NA	NA	NA
29380730_222871	29380730	C	Thupl.29380730s0002	Thupl.29380730s0002.1.v3.1	Transcript	3_prime_UTR_variant	1411	NA	NA	NA	NA	NA
29380733_644233	29380733	C	Thupl.29380733s0001	Thupl.29380733s0001.1.v3.1	Transcript	3_prime_UTR_variant	3967	NA	NA	NA	NA	NA
29380738_1081090	29380738	A	Thupl.29380738s0004	Thupl.29380738s0004.1.v3.1	Transcript	3_prime_UTR_variant	1178	NA	NA	NA	NA	NA
29380738_1081094	29380738	A	Thupl.29380738s0004	Thupl.29380738s0004.1.v3.1	Transcript	3_prime_UTR_variant	1174	NA	NA	NA	NA	NA
29380738_1081105	29380738	T	Thupl.29380738s0004	Thupl.29380738s0004.1.v3.1	Transcript	3_prime_UTR_variant	1163	NA	NA	NA	NA	NA
29380741_119660	29380741	G	Thupl.29380741s0001	Thupl.29380741s0001.1.v3.1	Transcript	3_prime_UTR_variant	991	NA	NA	NA	NA	NA
29380744_3705286	29380744	C	Thupl.29380744s0022	Thupl.29380744s0022.1.v3.1	Transcript	3_prime_UTR_variant	2005	NA	NA	NA	NA	NA
29380744_3705353	29380744	C	Thupl.29380744s0022	Thupl.29380744s0022.1.v3.1	Transcript	3_prime_UTR_variant	2072	NA	NA	NA	NA	NA
29380744_3705358	29380744	A	Thupl.29380744s0022	Thupl.29380744s0022.1.v3.1	Transcript	3_prime_UTR_variant	2077	NA	NA	NA	NA	NA
29380744_3705365	29380744	G	Thupl.29380744s0022	Thupl.29380744s0022.1.v3.1	Transcript	3_prime_UTR_variant	2084	NA	NA	NA	NA	NA
29380744_3705422	29380744	G	Thupl.29380744s0022	Thupl.29380744s0022.1.v3.1	Transcript	3_prime_UTR_variant	2141	NA	NA	NA	NA	NA
29380744_4139473	29380744	C	Thupl.29380744s0023	Thupl.29380744s0023.1.v3.1	Transcript	3_prime_UTR_variant	1524	NA	NA	NA	NA	NA
29380744_4710996	29380744	G	Thupl.29380744s0026	Thupl.29380744s0026.1.v3.1	Transcript	3_prime_UTR_variant	2779	NA	NA	NA	NA	NA
29380744_6801082	29380744	T	Thupl.29380744s0048	Thupl.29380744s0048.1.v3.1	Transcript	3_prime_UTR_variant	1057	NA	NA	NA	NA	NA
29380744_6801138	29380744	A	Thupl.29380744s0048	Thupl.29380744s0048.1.v3.1	Transcript	3_prime_UTR_variant	1113	NA	NA	NA	NA	NA
29380747_2109260	29380747	G	Thupl.29380747s0013	Thupl.29380747s0013.1.v3.1	Transcript	3_prime_UTR_variant	1196	NA	NA	NA	NA	NA
29380749_2624536	29380749	A	Thupl.29380749s0009	Thupl.29380749s0009.1.v3.1	Transcript	3_prime_UTR_variant	3933	NA	NA	NA	NA	NA
29380749_2624581	29380749	T	Thupl.29380749s0009	Thupl.29380749s0009.1.v3.1	Transcript	3_prime_UTR_variant	3888	NA	NA	NA	NA	NA
29380749_2839755	29380749	A	Thupl.29380749s0010	Thupl.29380749s0010.1.v3.1	Transcript	3_prime_UTR_variant	777	NA	NA	NA	NA	NA
29380749_2839768	29380749	C	Thupl.29380749s0010	Thupl.29380749s0010.1.v3.1	Transcript	3_prime_UTR_variant	790	NA	NA	NA	NA	NA
29380750_127536	29380750	A	Thupl.29380750s0001	Thupl.29380750s0001.1.v3.1	Transcript	3_prime_UTR_variant	1922	NA	NA	NA	NA	NA
29380750_127573	29380750	T	Thupl.29380750s0001	Thupl.29380750s0001.1.v3.1	Transcript	3_prime_UTR_variant	1885	NA	NA	NA	NA	NA
29380777_1338325	29380777	T	Thupl.29380777s0003	Thupl.29380777s0003.1.v3.1	Transcript	3_prime_UTR_variant	2040	NA	NA	NA	NA	NA
29380786_706541	29380786	C	Thupl.29380786s0003	Thupl.29380786s0003.5.v3.1	Transcript	3_prime_UTR_variant	1383	NA	NA	NA	NA	NA
29380787_654584	29380787	G	Thupl.29380787s0003	Thupl.29380787s0003.1.v3.1	Transcript	3_prime_UTR_variant	2692	NA	NA	NA	NA	NA
29380787_654844	29380787	G	Thupl.29380787s0003	Thupl.29380787s0003.1.v3.1	Transcript	3_prime_UTR_variant	2432	NA	NA	NA	NA	NA
29380787_654870	29380787	G	Thupl.29380787s0003	Thupl.29380787s0003.1.v3.1	Transcript	3_prime_UTR_variant	2406	NA	NA	NA	NA	NA
29380787_654889	29380787	G	Thupl.29380787s0003	Thupl.29380787s0003.1.v3.1	Transcript	3_prime_UTR_variant	2387	NA	NA	NA	NA	NA
29380790_682149	29380790	T	Thupl.29380790s0001	Thupl.29380790s0001.4.v3.1	Transcript	3_prime_UTR_variant	1171	NA	NA	NA	NA	NA
29380793_5502645	29380793	A	Thupl.29380793s0020	Thupl.29380793s0020.1.v3.1	Transcript	3_prime_UTR_variant	936	NA	NA	NA	NA	NA
29380793_5502654	29380793	A	Thupl.29380793s0020	Thupl.29380793s0020.1.v3.1	Transcript	3_prime_UTR_variant	927	NA	NA	NA	NA	NA
29380801_2425839	29380801	T	Thupl.29380801s0012	Thupl.29380801s0012.1.v3.1	Transcript	3_prime_UTR_variant	1983	NA	NA	NA	NA	NA
29380801_2425862	29380801	G	Thupl.29380801s0012	Thupl.29380801s0012.1.v3.1	Transcript	3_prime_UTR_variant	1960	NA	NA	NA	NA	NA
29380804_2949322	29380804	A	Thupl.29380804s0016	Thupl.29380804s0016.1.v3.1	Transcript	3_prime_UTR_variant	2213	NA	NA	NA	NA	NA
29380804_4732746	29380804	C	Thupl.29380804s0026	Thupl.29380804s0026.1.v3.1	Transcript	3_prime_UTR_variant	2583	NA	NA	NA	NA	NA
29380804_4732747	29380804	A	Thupl.29380804s0026	Thupl.29380804s0026.1.v3.1	Transcript	3_prime_UTR_variant	2582	NA	NA	NA	NA	NA
29380806_390746	29380806	C	Thupl.29380806s0001	Thupl.29380806s0001.1.v3.1	Transcript	3_prime_UTR_variant	1786	NA	NA	NA	NA	NA
29380806_390958	29380806	T	Thupl.29380806s0001	Thupl.29380806s0001.1.v3.1	Transcript	3_prime_UTR_variant	1574	NA	NA	NA	NA	NA
29380806_535425	29380806	T	Thupl.29380806s0002	Thupl.29380806s0002.1.v3.1	Transcript	3_prime_UTR_variant	1647	NA	NA	NA	NA	NA
29380806_535460	29380806	A	Thupl.29380806s0002	Thupl.29380806s0002.1.v3.1	Transcript	3_prime_UTR_variant	1612	NA	NA	NA	NA	NA
29380806_1227380	29380806	A	Thupl.29380806s0005	Thupl.29380806s0005.1.v3.1	Transcript	3_prime_UTR_variant	3536	NA	NA	NA	NA	NA
29380806_1414591	29380806	A	Thupl.29380806s0006	Thupl.29380806s0006.1.v3.1	Transcript	3_prime_UTR_variant	720	NA	NA	NA	NA	NA
29380809_814681	29380809	A	Thupl.29380809s0002	Thupl.29380809s0002.1.v3.1	Transcript	3_prime_UTR_variant	1387	NA	NA	NA	NA	NA
29380809_814781	29380809	T	Thupl.29380809s0002	Thupl.29380809s0002.1.v3.1	Transcript	3_prime_UTR_variant	1487	NA	NA	NA	NA	NA
29380822_571050	29380822	G	Thupl.29380822s0002	Thupl.29380822s0002.1.v3.1	Transcript	3_prime_UTR_variant	638	NA	NA	NA	NA	NA
29380822_571091	29380822	C	Thupl.29380822s0002	Thupl.29380822s0002.1.v3.1	Transcript	3_prime_UTR_variant	679	NA	NA	NA	NA	NA
29380823_3007512	29380823	T	Thupl.29380823s0013	Thupl.29380823s0013.1.v3.1	Transcript	3_prime_UTR_variant	767	NA	NA	NA	NA	NA
29380824_2911344	29380824	A	Thupl.29380824s0015	Thupl.29380824s0015.1.v3.1	Transcript	3_prime_UTR_variant	4137	NA	NA	NA	NA	NA
29380828_220709	29380828	A	Thupl.29380828s0002	Thupl.29380828s0002.1.v3.1	Transcript	3_prime_UTR_variant	2036	NA	NA	NA	NA	NA
29380848_785027	29380848	A	Thupl.29380848s0004	Thupl.29380848s0004.1.v3.1	Transcript	3_prime_UTR_variant	617	NA	NA	NA	NA	NA
29380853_689027	29380853	C	Thupl.29380853s0004	Thupl.29380853s0004.1.v3.1	Transcript	3_prime_UTR_variant	2683	NA	NA	NA	NA	NA
29380853_689091	29380853	C	Thupl.29380853s0004	Thupl.29380853s0004.1.v3.1	Transcript	3_prime_UTR_variant	2619	NA	NA	NA	NA	NA
29380860_2587579	29380860	G	Thupl.29380860s0006	Thupl.29380860s0006.1.v3.1	Transcript	3_prime_UTR_variant	2246	NA	NA	NA	NA	NA
29380860_2791937	29380860	A	Thupl.29380860s0007	Thupl.29380860s0007.1.v3.1	Transcript	3_prime_UTR_variant	1721	NA	NA	NA	NA	NA
29380860_2791946	29380860	A	Thupl.29380860s0007	Thupl.29380860s0007.1.v3.1	Transcript	3_prime_UTR_variant	1712	NA	NA	NA	NA	NA
29380870_755844	29380870	G	Thupl.29380870s0002	Thupl.29380870s0002.1.v3.1	Transcript	3_prime_UTR_variant	3472	NA	NA	NA	NA	NA
29380870_763420	29380870	C	Thupl.29380870s0002	Thupl.29380870s0002.1.v3.1	Transcript	3_prime_UTR_variant	6741	NA	NA	NA	NA	NA
29380870_763658	29380870	G	Thupl.29380870s0002	Thupl.29380870s0002.1.v3.1	Transcript	3_prime_UTR_variant	6979	NA	NA	NA	NA	NA
29380870_2873150	29380870	G	Thupl.29380870s0010	Thupl.29380870s0010.1.v3.1	Transcript	3_prime_UTR_variant	1762	NA	NA	NA	NA	NA
29380870_5806860	29380870	G	Thupl.29380870s0044	Thupl.29380870s0044.1.v3.1	Transcript	3_prime_UTR_variant	2188	NA	NA	NA	NA	NA
29380870_5806941	29380870	G	Thupl.29380870s0044	Thupl.29380870s0044.1.v3.1	Transcript	3_prime_UTR_variant	2107	NA	NA	NA	NA	NA
29380870_5806970	29380870	C	Thupl.29380870s0044	Thupl.29380870s0044.1.v3.1	Transcript	3_prime_UTR_variant	2078	NA	NA	NA	NA	NA
29380880_408905	29380880	G	Thupl.29380880s0002	Thupl.29380880s0002.1.v3.1	Transcript	3_prime_UTR_variant	1150	NA	NA	NA	NA	NA
29380880_408910	29380880	A	Thupl.29380880s0002	Thupl.29380880s0002.1.v3.1	Transcript	3_prime_UTR_variant	1145	NA	NA	NA	NA	NA
29380880_409274	29380880	C	Thupl.29380880s0002	Thupl.29380880s0002.1.v3.1	Transcript	3_prime_UTR_variant	781	NA	NA	NA	NA	NA
29380886_209973	29380886	C	Thupl.29380886s0001	Thupl.29380886s0001.1.v3.1	Transcript	3_prime_UTR_variant	1105	NA	NA	NA	NA	NA
29380887_941591	29380887	A	Thupl.29380887s0004	Thupl.29380887s0004.1.v3.1	Transcript	3_prime_UTR_variant	962	NA	NA	NA	NA	NA
29380898_1204619	29380898	G	Thupl.29380898s0003	Thupl.29380898s0003.1.v3.1	Transcript	3_prime_UTR_variant	2934	NA	NA	NA	NA	NA
29380916_411564	29380916	A	Thupl.29380916s0002	Thupl.29380916s0002.1.v3.1	Transcript	3_prime_UTR_variant	5960	NA	NA	NA	NA	NA
29380916_411621	29380916	T	Thupl.29380916s0002	Thupl.29380916s0002.1.v3.1	Transcript	3_prime_UTR_variant	6017	NA	NA	NA	NA	NA
29380916_411622	29380916	C	Thupl.29380916s0002	Thupl.29380916s0002.1.v3.1	Transcript	3_prime_UTR_variant	6018	NA	NA	NA	NA	NA
29380919_776599	29380919	T	Thupl.29380919s0003	Thupl.29380919s0003.1.v3.1	Transcript	3_prime_UTR_variant	1614	NA	NA	NA	NA	NA
29380919_899706	29380919	G	Thupl.29380919s0004	Thupl.29380919s0004.1.v3.1	Transcript	3_prime_UTR_variant	4653	NA	NA	NA	NA	NA
29380919_899749	29380919	C	Thupl.29380919s0004	Thupl.29380919s0004.1.v3.1	Transcript	3_prime_UTR_variant	4610	NA	NA	NA	NA	NA
29380919_899796	29380919	T	Thupl.29380919s0004	Thupl.29380919s0004.1.v3.1	Transcript	3_prime_UTR_variant	4563	NA	NA	NA	NA	NA
29380925_362946	29380925	C	Thupl.29380925s0006	Thupl.29380925s0006.1.v3.1	Transcript	3_prime_UTR_variant	682	NA	NA	NA	NA	NA
29380925_1417650	29380925	A	Thupl.29380925s0011	Thupl.29380925s0011.2.v3.1	Transcript	3_prime_UTR_variant	1342	NA	NA	NA	NA	NA
29380929_619373	29380929	G	Thupl.29380929s0003	Thupl.29380929s0003.1.v3.1	Transcript	3_prime_UTR_variant	1099	NA	NA	NA	NA	NA
29380929_619391	29380929	C	Thupl.29380929s0003	Thupl.29380929s0003.1.v3.1	Transcript	3_prime_UTR_variant	1117	NA	NA	NA	NA	NA
29380931_140238	29380931	C	Thupl.29380931s0001	Thupl.29380931s0001.1.v3.1	Transcript	3_prime_UTR_variant	1294	NA	NA	NA	NA	NA
29380931_140255	29380931	A	Thupl.29380931s0001	Thupl.29380931s0001.1.v3.1	Transcript	3_prime_UTR_variant	1277	NA	NA	NA	NA	NA
29380931_625541	29380931	A	Thupl.29380931s0002	Thupl.29380931s0002.1.v3.1	Transcript	3_prime_UTR_variant	3119	NA	NA	NA	NA	NA
29380931_625567	29380931	C	Thupl.29380931s0002	Thupl.29380931s0002.1.v3.1	Transcript	3_prime_UTR_variant	3145	NA	NA	NA	NA	NA
29380931_6764557	29380931	T	Thupl.29380931s0015	Thupl.29380931s0015.1.v3.1	Transcript	3_prime_UTR_variant	2599	NA	NA	NA	NA	NA
29380935_77208	29380935	T	Thupl.29380935s0001	Thupl.29380935s0001.1.v3.1	Transcript	3_prime_UTR_variant	1081	NA	NA	NA	NA	NA
29380935_1114778	29380935	G	Thupl.29380935s0006	Thupl.29380935s0006.1.v3.1	Transcript	3_prime_UTR_variant	2078	NA	NA	NA	NA	NA
29380935_1114782	29380935	T	Thupl.29380935s0006	Thupl.29380935s0006.1.v3.1	Transcript	3_prime_UTR_variant	2074	NA	NA	NA	NA	NA
29380936_1119803	29380936	C	Thupl.29380936s0002	Thupl.29380936s0002.1.v3.1	Transcript	3_prime_UTR_variant	1071	NA	NA	NA	NA	NA
29380943_1326171	29380943	A	Thupl.29380943s0005	Thupl.29380943s0005.1.v3.1	Transcript	3_prime_UTR_variant	2061	NA	NA	NA	NA	NA
29380943_1326380	29380943	G	Thupl.29380943s0005	Thupl.29380943s0005.1.v3.1	Transcript	3_prime_UTR_variant	2270	NA	NA	NA	NA	NA
29380945_452411	29380945	T	Thupl.29380945s0001	Thupl.29380945s0001.1.v3.1	Transcript	3_prime_UTR_variant	2788	NA	NA	NA	NA	NA
29380945_2289916	29380945	A	Thupl.29380945s0008	Thupl.29380945s0008.1.v3.1	Transcript	3_prime_UTR_variant	2297	NA	NA	NA	NA	NA
29380948_2266228	29380948	T	Thupl.29380948s0010	Thupl.29380948s0010.1.v3.1	Transcript	3_prime_UTR_variant	4906	NA	NA	NA	NA	NA
29380948_2531679	29380948	G	Thupl.29380948s0011	Thupl.29380948s0011.1.v3.1	Transcript	3_prime_UTR_variant	1932	NA	NA	NA	NA	NA
29380951_522693	29380951	C	Thupl.29380951s0002	Thupl.29380951s0002.1.v3.1	Transcript	3_prime_UTR_variant	2483	NA	NA	NA	NA	NA
29380951_788507	29380951	C	Thupl.29380951s0004	Thupl.29380951s0004.1.v3.1	Transcript	3_prime_UTR_variant	2484	NA	NA	NA	NA	NA
29380951_788562	29380951	G	Thupl.29380951s0004	Thupl.29380951s0004.1.v3.1	Transcript	3_prime_UTR_variant	2429	NA	NA	NA	NA	NA
29380951_969197	29380951	A	Thupl.29380951s0005	Thupl.29380951s0005.1.v3.1	Transcript	3_prime_UTR_variant	1324	NA	NA	NA	NA	NA
29380959_1617815	29380959	G	Thupl.29380959s0007	Thupl.29380959s0007.1.v3.1	Transcript	3_prime_UTR_variant	3249	NA	NA	NA	NA	NA
29380959_1617922	29380959	A	Thupl.29380959s0007	Thupl.29380959s0007.1.v3.1	Transcript	3_prime_UTR_variant	3356	NA	NA	NA	NA	NA
29380965_461818	29380965	G	Thupl.29380965s0001	Thupl.29380965s0001.1.v3.1	Transcript	3_prime_UTR_variant	624	NA	NA	NA	NA	NA
29380965_461836	29380965	G	Thupl.29380965s0001	Thupl.29380965s0001.1.v3.1	Transcript	3_prime_UTR_variant	642	NA	NA	NA	NA	NA
29380965_462099	29380965	G	Thupl.29380965s0001	Thupl.29380965s0001.1.v3.1	Transcript	3_prime_UTR_variant	905	NA	NA	NA	NA	NA
29380965_4401477	29380965	T	Thupl.29380965s0010	Thupl.29380965s0010.1.v3.1	Transcript	3_prime_UTR_variant	1181	NA	NA	NA	NA	NA
29380970_2290613	29380970	A	Thupl.29380970s0017	Thupl.29380970s0017.1.v3.1	Transcript	3_prime_UTR_variant	1604	NA	NA	NA	NA	NA
29380970_2290705	29380970	A	Thupl.29380970s0017	Thupl.29380970s0017.1.v3.1	Transcript	3_prime_UTR_variant	1512	NA	NA	NA	NA	NA
29380971_1145866	29380971	C	Thupl.29380971s0008	Thupl.29380971s0008.1.v3.1	Transcript	3_prime_UTR_variant	2789	NA	NA	NA	NA	NA
[truncated: 15,729 more rows]

## Sheet: Coding_SNPs
SNP	Scaffold	Allele	Gene	Feature	Feature_type	Consequence	cDNA_position	CDS_position	Protein_position	Amino_acids	Codons	Existing_variation
28144677_2692	28144677	C	Thupl.28144677s0001	Thupl.28144677s0001.1.v3.1	Transcript	missense_variant	2558	2495	832	R/T	aGa/aCa	NA
28231171_1460	28231171	C	Thupl.28231171s0001	Thupl.28231171s0001.1.v3.1	Transcript	missense_variant	184	184	62	T/A	Aca/Gca	NA
28317569_5675	28317569	A	Thupl.28317569s0001	Thupl.28317569s0001.1.v3.1	Transcript	missense_variant	1394	842	281	R/L	cGc/cTc	NA
28317569_5681	28317569	T	Thupl.28317569s0001	Thupl.28317569s0001.1.v3.1	Transcript	missense_variant	1388	836	279	R/K	aGa/aAa	NA
28390819_2898	28390819	T	Thupl.28390819s0001	Thupl.28390819s0001.1.v3.1	Transcript	missense_variant	115	115	39	A/T	Gct/Act	NA
28503057_6335	28503057	T	Thupl.28503057s0001	Thupl.28503057s0001.1.v3.1	Transcript	missense_variant	1211	921	307	N/K	aaC/aaA	NA
28581233_2329	28581233	C	Thupl.28581233s0002	Thupl.28581233s0002.1.v3.1	Transcript	missense_variant	535	272	91	G/A	gGt/gCt	NA
29109334_2668	29109334	G	Thupl.29109334s0001	Thupl.29109334s0001.1.v3.1	Transcript	missense_variant	71	71	24	M/T	aTg/aCg	NA
29237346_4293	29237346	T	Thupl.29237346s0001	Thupl.29237346s0001.1.v3.1	Transcript	missense_variant	22	22	8	V/I	Gtt/Att	NA
293114653_4429	293114653	G	Thupl.293114653s0001	Thupl.293114653s0001.1.v3.1	Transcript	missense_variant	452	452	151	F/S	tTc/tCc	NA
293114653_4510	293114653	G	Thupl.293114653s0001	Thupl.293114653s0001.1.v3.1	Transcript	missense_variant	371	371	124	E/A	gAa/gCa	NA
29334608_228057	29334608	T	Thupl.29334608s0001	Thupl.29334608s0001.1.v3.1	Transcript	missense_variant	13963	4769	1590	R/H	cGc/cAc	NA
29334608_276102	29334608	C	Thupl.29334608s0001	Thupl.29334608s0001.1.v3.1	Transcript	missense_variant	11533	2339	780	Q/R	cAa/cGa	NA
29334608_276172	29334608	A	Thupl.29334608s0001	Thupl.29334608s0001.1.v3.1	Transcript	missense_variant	11463	2269	757	R/C	Cgt/Tgt	NA
29334608_276433	29334608	A	Thupl.29334608s0001	Thupl.29334608s0001.1.v3.1	Transcript	missense_variant	11202	2008	670	P/S	Ccc/Tcc	NA
29334608_278115	29334608	C	Thupl.29334608s0001	Thupl.29334608s0001.1.v3.1	Transcript	missense_variant	9520	326	109	D/G	gAt/gGt	NA
29334734_119735	29334734	T	Thupl.29334734s0001	Thupl.29334734s0001.1.v3.1	Transcript	missense_variant	1291	958	320	D/N	Gat/Aat	NA
29335367_307864	29335367	C	Thupl.29335367s0001	Thupl.29335367s0001.1.v3.1	Transcript	missense_variant	416	251	84	S/T	aGc/aCc	NA
29336754_408078	29336754	T	Thupl.29336754s0001	Thupl.29336754s0001.1.v3.1	Transcript	missense_variant	614	209	70	G/E	gGa/gAa	NA
29336754_408134	29336754	C	Thupl.29336754s0001	Thupl.29336754s0001.1.v3.1	Transcript	missense_variant	558	153	51	H/Q	caC/caG	NA
29337586_227351	29337586	A	Thupl.29337586s0001	Thupl.29337586s0001.1.v3.1	Transcript	missense_variant	238	230	77	A/V	gCc/gTc	NA
29338841_49895	29338841	G	Thupl.29338841s0002	Thupl.29338841s0002.1.v3.1	Transcript	missense_variant	632	613	205	P/A	Cca/Gca	NA
29339144_452208	29339144	T	Thupl.29339144s0002	Thupl.29339144s0002.1.v3.1	Transcript	missense_variant	4581	2304	768	D/E	gaT/gaA	NA
29339144_453117	29339144	G	Thupl.29339144s0002	Thupl.29339144s0002.1.v3.1	Transcript	missense_variant	3672	1395	465	M/I	atG/atC	NA
29339144_759625	29339144	C	Thupl.29339144s0003	Thupl.29339144s0003.1.v3.1	Transcript	missense_variant	268	268	90	L/V	Tta/Gta	NA
29339708_28509	29339708	T	Thupl.29339708s0001	Thupl.29339708s0001.1.v3.1	Transcript	missense_variant	707	472	158	V/F	Gtt/Ttt	NA
29341164_482171	29341164	A	Thupl.29341164s0002	Thupl.29341164s0002.1.v3.1	Transcript	missense_variant	294	118	40	S/T	Tct/Act	NA
29342720_371910	29342720	A	Thupl.29342720s0002	Thupl.29342720s0002.1.v3.1	Transcript	missense_variant	137	7	3	V/I	Gta/Ata	NA
29343224_1355	29343224	T	Thupl.29343224s0001	Thupl.29343224s0001.1.v3.1	Transcript	missense_variant	1098	96	32	K/N	aaA/aaT	NA
29343746_19067	29343746	C	Thupl.29343746s0001	Thupl.29343746s0001.1.v3.1	Transcript	missense_variant	308	277	93	R/G	Agg/Ggg	NA
29345239_713348	29345239	T	Thupl.29345239s0001	Thupl.29345239s0001.1.v3.1	Transcript	missense_variant	235	235	79	A/T	Gca/Aca	NA
29345763_330449	29345763	G	Thupl.29345763s0013	Thupl.29345763s0013.1.v3.1	Transcript	missense_variant	1019	590	197	I/S	aTt/aGt	NA
29345763_355901	29345763	T	Thupl.29345763s0013	Thupl.29345763s0013.1.v3.1	Transcript	missense_variant	1144	715	239	H/Y	Cat/Tat	NA
29346740_189284	29346740	G	Thupl.29346740s0001	Thupl.29346740s0001.1.v3.1	Transcript	missense_variant	178	20	7	N/T	aAt/aCt	NA
29349008_502063	29349008	A	Thupl.29349008s0002	Thupl.29349008s0002.1.v3.1	Transcript	missense_variant	4196	2960	987	C/F	tGc/tTc	NA
29349114_323786	29349114	A	Thupl.29349114s0004	Thupl.29349114s0004.1.v3.1	Transcript	missense_variant	775	538	180	P/T	Cca/Aca	NA
29349267_119307	29349267	G	Thupl.29349267s0001	Thupl.29349267s0001.1.v3.1	Transcript	missense_variant	461	213	71	M/I	atG/atC	NA
29350508_1110565	29350508	A	Thupl.29350508s0010	Thupl.29350508s0010.1.v3.1	Transcript	missense_variant	2028	1569	523	H/Q	caC/caA	NA
29350629_367049	29350629	G	Thupl.29350629s0001	Thupl.29350629s0001.1.v3.1	Transcript	missense_variant	1660	1432	478	I/V	Att/Gtt	NA
29350629_394925	29350629	C	Thupl.29350629s0001	Thupl.29350629s0001.1.v3.1	Transcript	missense_variant	2102	1874	625	V/A	gTt/gCt	NA
29352345_709468	29352345	G	Thupl.29352345s0003	Thupl.29352345s0003.1.v3.1	Transcript	missense_variant	1384	1189	397	C/R	Tgt/Cgt	NA
29353611_2647	29353611	A	Thupl.29353611s0001	Thupl.29353611s0001.1.v3.1	Transcript	missense_variant	530	114	38	D/E	gaT/gaA	NA
29353611_2663	29353611	G	Thupl.29353611s0001	Thupl.29353611s0001.1.v3.1	Transcript	missense_variant	546	130	44	R/G	Aga/Gga	NA
29353851_1139753	29353851	A	Thupl.29353851s0002	Thupl.29353851s0002.1.v3.1	Transcript	missense_variant	2975	2518	840	G/R	Ggg/Agg	NA
29355029_70803	29355029	C	Thupl.29355029s0001	Thupl.29355029s0001.1.v3.1	Transcript	missense_variant	2196	2153	718	V/G	gTg/gGg	NA
29355726_48273	29355726	G	Thupl.29355726s0001	Thupl.29355726s0001.1.v3.1	Transcript	missense_variant	1227	58	20	W/G	Tgg/Ggg	NA
29355726_48643	29355726	C	Thupl.29355726s0001	Thupl.29355726s0001.1.v3.1	Transcript	missense_variant	1597	428	143	V/A	gTa/gCa	NA
29355726_140573	29355726	A	Thupl.29355726s0003	Thupl.29355726s0003.1.v3.1	Transcript	missense_variant	268	17	6	T/M	aCg/aTg	NA
29356690_16845	29356690	A	Thupl.29356690s0001	Thupl.29356690s0001.1.v3.1	Transcript	missense_variant	79	79	27	L/I	Ctt/Att	NA
29356690_16899	29356690	A	Thupl.29356690s0001	Thupl.29356690s0001.1.v3.1	Transcript	missense_variant	133	133	45	H/N	Cac/Aac	NA
29356690_16902	29356690	A	Thupl.29356690s0001	Thupl.29356690s0001.1.v3.1	Transcript	missense_variant	136	136	46	G/R	Gga/Aga	NA
29356690_16906	29356690	G	Thupl.29356690s0001	Thupl.29356690s0001.1.v3.1	Transcript	missense_variant	140	140	47	N/S	aAc/aGc	NA
29356690_16945	29356690	C	Thupl.29356690s0001	Thupl.29356690s0001.1.v3.1	Transcript	missense_variant	179	179	60	N/T	aAt/aCt	NA
29358072_897249	29358072	T	Thupl.29358072s0002	Thupl.29358072s0002.1.v3.1	Transcript	missense_variant	477	309	103	Q/H	caG/caT	NA
29358072_897292	29358072	C	Thupl.29358072s0002	Thupl.29358072s0002.1.v3.1	Transcript	missense_variant	520	352	118	V/L	Gtg/Ctg	NA
29358072_921551	29358072	A	Thupl.29358072s0002	Thupl.29358072s0002.1.v3.1	Transcript	missense_variant	668	500	167	S/N	aGt/aAt	NA
29358072_1218582	29358072	C	Thupl.29358072s0003	Thupl.29358072s0003.1.v3.1	Transcript	missense_variant	1007	295	99	S/P	Tcc/Ccc	NA
29358265_288233	29358265	A	Thupl.29358265s0002	Thupl.29358265s0002.1.v3.1	Transcript	missense_variant	1058	647	216	L/Q	cTa/cAa	NA
29359568_180763	29359568	A	Thupl.29359568s0002	Thupl.29359568s0002.1.v3.1	Transcript	missense_variant	163	143	48	G/D	gGc/gAc	NA
29359568_180802	29359568	A	Thupl.29359568s0002	Thupl.29359568s0002.1.v3.1	Transcript	missense_variant	202	182	61	R/K	aGg/aAg	NA
29359568_186542	29359568	T	Thupl.29359568s0002	Thupl.29359568s0002.1.v3.1	Transcript	missense_variant	444	424	142	G/W	Ggg/Tgg	NA
29361372_486987	29361372	T	Thupl.29361372s0007	Thupl.29361372s0007.1.v3.1	Transcript	missense_variant	740	577	193	A/T	Gca/Aca	NA
29361803_60110	29361803	A	Thupl.29361803s0001	Thupl.29361803s0001.1.v3.1	Transcript	missense_variant	989	757	253	G/S	Ggt/Agt	NA
29362621_88059	29362621	C	Thupl.29362621s0001	Thupl.29362621s0001.1.v3.1	Transcript	missense_variant	731	565	189	L/V	Ctc/Gtc	NA
29362647_95080	29362647	A	Thupl.29362647s0001	Thupl.29362647s0001.1.v3.1	Transcript	missense_variant	1372	1372	458	A/T	Gca/Aca	NA
29363519_55273	29363519	G	Thupl.29363519s0001	Thupl.29363519s0001.1.v3.1	Transcript	missense_variant	668	491	164	V/A	gTa/gCa	NA
29363748_729034	29363748	A	Thupl.29363748s0003	Thupl.29363748s0003.1.v3.1	Transcript	missense_variant	1586	194	65	V/D	gTt/gAt	NA
29363748_936850	29363748	A	Thupl.29363748s0003	Thupl.29363748s0003.1.v3.1	Transcript	missense_variant	3329	1937	646	R/H	cGc/cAc	NA
29364006_9063	29364006	G	Thupl.29364006s0001	Thupl.29364006s0001.1.v3.1	Transcript	missense_variant	663	267	89	D/E	gaT/gaG	NA
29364006_27708	29364006	A	Thupl.29364006s0001	Thupl.29364006s0001.1.v3.1	Transcript	missense_variant	916	520	174	P/T	Ccg/Acg	NA
29364006_27724	29364006	T	Thupl.29364006s0001	Thupl.29364006s0001.1.v3.1	Transcript	missense_variant	932	536	179	T/I	aCa/aTa	NA
29364006_49228	29364006	T	Thupl.29364006s0001	Thupl.29364006s0001.1.v3.1	Transcript	missense_variant	1577	1181	394	P/L	cCt/cTt	NA
29364006_49230	29364006	C	Thupl.29364006s0001	Thupl.29364006s0001.1.v3.1	Transcript	missense_variant	1579	1183	395	S/P	Tcc/Ccc	NA
29364065_168584	29364065	T	Thupl.29364065s0002	Thupl.29364065s0002.1.v3.1	Transcript	missense_variant	575	259	87	V/F	Gtt/Ttt	NA
29366303_71781	29366303	G	Thupl.29366303s0001	Thupl.29366303s0001.1.v3.1	Transcript	missense_variant	908	389	130	I/T	aTc/aCc	NA
29367860_10385	29367860	C	Thupl.29367860s0001	Thupl.29367860s0001.1.v3.1	Transcript	missense_variant	4743	1718	573	Y/S	tAc/tCc	NA
29368928_1007197	29368928	T	Thupl.29368928s0008	Thupl.29368928s0008.1.v3.1	Transcript	missense_variant	370	88	30	A/T	Gcg/Acg	NA
29369386_37299	29369386	C	Thupl.29369386s0002	Thupl.29369386s0002.1.v3.1	Transcript	missense_variant	3107	2033	678	L/S	tTg/tCg	NA
29369386_353295	29369386	A	Thupl.29369386s0005	Thupl.29369386s0005.1.v3.1	Transcript	missense_variant	1057	631	211	A/S	Gct/Tct	NA
29370871_442343	29370871	A	Thupl.29370871s0003	Thupl.29370871s0003.1.v3.1	Transcript	missense_variant	745	343	115	F/I	Ttt/Att	NA
29372212_399891	29372212	A	Thupl.29372212s0003	Thupl.29372212s0003.1.v3.1	Transcript	missense_variant	386	19	7	L/I	Tta/Ata	NA
29372212_575723	29372212	T	Thupl.29372212s0005	Thupl.29372212s0005.1.v3.1	Transcript	missense_variant	1787	300	100	D/E	gaT/gaA	NA
29372657_230482	29372657	A	Thupl.29372657s0001	Thupl.29372657s0001.1.v3.1	Transcript	missense_variant	1045	452	151	A/V	gCa/gTa	NA
29372902_195663	29372902	C	Thupl.29372902s0002	Thupl.29372902s0002.1.v3.1	Transcript	missense_variant	324	116	39	F/S	tTt/tCt	NA
29373002_24767	29373002	A	Thupl.29373002s0001	Thupl.29373002s0001.1.v3.1	Transcript	missense_variant	889	727	243	P/T	Cca/Aca	NA
29373633_342328	29373633	A	Thupl.29373633s0001	Thupl.29373633s0001.1.v3.1	Transcript	missense_variant	1967	1612	538	R/W	Cgg/Tgg	NA
29373633_361246	29373633	A	Thupl.29373633s0001	Thupl.29373633s0001.1.v3.1	Transcript	missense_variant	1045	690	230	E/D	gaA/gaT	NA
29376465_295680	29376465	G	Thupl.29376465s0001	Thupl.29376465s0001.1.v3.1	Transcript	missense_variant	1516	1036	346	I/L	Atc/Ctc	NA
29376488_863539	29376488	T	Thupl.29376488s0005	Thupl.29376488s0005.1.v3.1	Transcript	missense_variant	790	227	76	S/F	tCt/tTt	NA
29376588_57734	29376588	A	Thupl.29376588s0001	Thupl.29376588s0001.1.v3.1	Transcript	missense_variant	596	238	80	L/F	Ctt/Ttt	NA
29376588_166991	29376588	G	Thupl.29376588s0002	Thupl.29376588s0002.1.v3.1	Transcript	missense_variant	438	190	64	T/A	Aca/Gca	NA
29376588_167001	29376588	G	Thupl.29376588s0002	Thupl.29376588s0002.1.v3.1	Transcript	missense_variant	448	200	67	H/R	cAt/cGt	NA
29376837_474407	29376837	A	Thupl.29376837s0007	Thupl.29376837s0007.1.v3.1	Transcript	missense_variant	247	170	57	P/L	cCt/cTt	NA
29376990_1407188	29376990	A	Thupl.29376990s0009	Thupl.29376990s0009.1.v3.1	Transcript	missense_variant	945	682	228	P/S	Cca/Tca	NA
29376992_81867	29376992	G	Thupl.29376992s0001	Thupl.29376992s0001.1.v3.1	Transcript	missense_variant	944	736	246	S/R	Agt/Cgt	NA
29376992_318616	29376992	T	Thupl.29376992s0002	Thupl.29376992s0002.1.v3.1	Transcript	missense_variant	314	154	52	V/I	Gta/Ata	NA
29376992_318657	29376992	T	Thupl.29376992s0002	Thupl.29376992s0002.1.v3.1	Transcript	missense_variant	273	113	38	L/H	cTt/cAt	NA
29376992_874828	29376992	T	Thupl.29376992s0005	Thupl.29376992s0005.1.v3.1	Transcript	missense_variant	317	127	43	L/F	Ctt/Ttt	NA
29377000_39969	29377000	A	Thupl.29377000s0001	Thupl.29377000s0001.1.v3.1	Transcript	missense_variant	1641	1165	389	V/F	Gtt/Ttt	NA
29377001_4086666	29377001	T	Thupl.29377001s0023	Thupl.29377001s0023.1.v3.1	Transcript	missense_variant	2036	1223	408	R/K	aGg/aAg	NA
29377001_4086844	29377001	C	Thupl.29377001s0023	Thupl.29377001s0023.1.v3.1	Transcript	missense_variant	1858	1045	349	I/V	Ata/Gta	NA
29377001_4086845	29377001	A	Thupl.29377001s0023	Thupl.29377001s0023.1.v3.1	Transcript	missense_variant	1857	1044	348	K/N	aaG/aaT	NA
29377001_4087317	29377001	C	Thupl.29377001s0023	Thupl.29377001s0023.1.v3.1	Transcript	missense_variant	1385	572	191	K/R	aAg/aGg	NA
29377007_507417	29377007	G	Thupl.29377007s0003	Thupl.29377007s0003.2.v3.1	Transcript	missense_variant	764	764	255	H/R	cAt/cGt	NA
29377012_293226	29377012	A	Thupl.29377012s0003	Thupl.29377012s0003.1.v3.1	Transcript	missense_variant	1027	700	234	A/T	Gct/Act	NA
29377013_1429919	29377013	C	Thupl.29377013s0008	Thupl.29377013s0008.1.v3.1	Transcript	missense_variant	231	86	29	G/A	gGc/gCc	NA
29377013_3396578	29377013	G	Thupl.29377013s0014	Thupl.29377013s0014.1.v3.1	Transcript	missense_variant	5146	4597	1533	I/V	Att/Gtt	NA
29377018_1553236	29377018	C	Thupl.29377018s0009	Thupl.29377018s0009.1.v3.1	Transcript	missense_variant	57	57	19	L/F	ttG/ttC	NA
29377018_1553252	29377018	G	Thupl.29377018s0009	Thupl.29377018s0009.1.v3.1	Transcript	missense_variant	73	73	25	T/A	Aca/Gca	NA
29377018_4421438	29377018	C	Thupl.29377018s0017	Thupl.29377018s0017.1.v3.1	Transcript	missense_variant	510	52	18	L/V	Ttg/Gtg	NA
29377020_478375	29377020	A	Thupl.29377020s0001	Thupl.29377020s0001.1.v3.1	Transcript	missense_variant	944	878	293	C/F	tGt/tTt	NA
29377027_799479	29377027	C	Thupl.29377027s0003	Thupl.29377027s0003.1.v3.1	Transcript	missense_variant	1225	872	291	G/A	gGa/gCa	NA
29377027_945642	29377027	G	Thupl.29377027s0004	Thupl.29377027s0004.1.v3.1	Transcript	missense_variant	2296	1735	579	T/A	Act/Gct	NA
29377027_945741	29377027	G	Thupl.29377027s0004	Thupl.29377027s0004.1.v3.1	Transcript	missense_variant	2395	1834	612	I/V	Atc/Gtc	NA
29377033_209671	29377033	A	Thupl.29377033s0001	Thupl.29377033s0001.1.v3.1	Transcript	missense_variant	208	79	27	P/S	Ccg/Tcg	NA
29377034_469708	29377034	A	Thupl.29377034s0001	Thupl.29377034s0001.1.v3.1	Transcript	missense_variant	477	400	134	D/N	Gat/Aat	NA
29377036_73913	29377036	A	Thupl.29377036s0001	Thupl.29377036s0001.1.v3.1	Transcript	missense_variant	1729	1729	577	V/F	Gtt/Ttt	NA
29377037_668375	29377037	C	Thupl.29377037s0002	Thupl.29377037s0002.1.v3.1	Transcript	missense_variant	2194	1168	390	Q/E	Cag/Gag	NA
29377037_1794277	29377037	C	Thupl.29377037s0007	Thupl.29377037s0007.1.v3.1	Transcript	missense_variant	2907	2651	884	Q/R	cAa/cGa	NA
29377042_4152706	29377042	G	Thupl.29377042s0016	Thupl.29377042s0016.1.v3.1	Transcript	missense_variant	502	76	26	I/V	Att/Gtt	NA
29377042_4163109	29377042	A	Thupl.29377042s0016	Thupl.29377042s0016.1.v3.1	Transcript	missense_variant	1121	695	232	S/N	aGt/aAt	NA
29377047_906952	29377047	A	Thupl.29377047s0010	Thupl.29377047s0010.1.v3.1	Transcript	missense_variant	1405	1135	379	F/I	Ttt/Att	NA
29377047_906976	29377047	A	Thupl.29377047s0010	Thupl.29377047s0010.1.v3.1	Transcript	missense_variant	1429	1159	387	E/K	Gaa/Aaa	NA
29377047_906977	29377047	A	Thupl.29377047s0010	Thupl.29377047s0010.1.v3.1	Transcript	missense_variant	1430	1160	387	L/Q	cTa/cAa	NA
29377047_1544449	29377047	T	Thupl.29377047s0014	Thupl.29377047s0014.1.v3.1	Transcript	missense_variant	197	48	16	K/N	aaG/aaT	NA
29377047_1544465	29377047	T	Thupl.29377047s0014	Thupl.29377047s0014.1.v3.1	Transcript	missense_variant	213	64	22	L/F	Ctt/Ttt	NA
29377047_1544517	29377047	G	Thupl.29377047s0014	Thupl.29377047s0014.1.v3.1	Transcript	missense_variant	265	116	39	D/G	gAc/gGc	NA
29377049_195782	29377049	A	Thupl.29377049s0001	Thupl.29377049s0001.1.v3.1	Transcript	missense_variant	1004	785	262	T/I	aCt/aTt	NA
29377049_423210	29377049	C	Thupl.29377049s0003	Thupl.29377049s0003.1.v3.1	Transcript	missense_variant	938	595	199	L/V	Ttg/Gtg	NA
29377049_425353	29377049	G	Thupl.29377049s0003	Thupl.29377049s0003.1.v3.1	Transcript	missense_variant	375	32	11	M/T	aTg/aCg	NA
29377049_2007441	29377049	G	Thupl.29377049s0010	Thupl.29377049s0010.1.v3.1	Transcript	missense_variant	629	450	150	Q/H	caA/caC	NA
29377055_929506	29377055	G	Thupl.29377055s0003	Thupl.29377055s0003.1.v3.1	Transcript	missense_variant	413	413	138	A/G	gCt/gGt	NA
29377068_896554	29377068	T	Thupl.29377068s0001	Thupl.29377068s0001.1.v3.1	Transcript	missense_variant	377	261	87	H/Q	caT/caA	NA
29377073_137947	29377073	T	Thupl.29377073s0001	Thupl.29377073s0001.1.v3.1	Transcript	missense_variant	1997	1514	505	S/N	aGt/aAt	NA
29377073_358559	29377073	T	Thupl.29377073s0003	Thupl.29377073s0003.1.v3.1	Transcript	missense_variant	198	59	20	F/Y	tTc/tAc	NA
29377079_994604	29377079	C	Thupl.29377079s0003	Thupl.29377079s0003.1.v3.1	Transcript	missense_variant	569	190	64	T/P	Act/Cct	NA
29377081_1316561	29377081	C	Thupl.29377081s0005	Thupl.29377081s0005.1.v3.1	Transcript	missense_variant	1941	1520	507	I/T	aTt/aCt	NA
29377087_812759	29377087	C	Thupl.29377087s0005	Thupl.29377087s0005.1.v3.1	Transcript	missense_variant	545	313	105	L/V	Ctt/Gtt	NA
29377091_1058711	29377091	T	Thupl.29377091s0009	Thupl.29377091s0009.1.v3.1	Transcript	missense_variant	240	52	18	P/S	Cct/Tct	NA
29377091_1058744	29377091	A	Thupl.29377091s0009	Thupl.29377091s0009.1.v3.1	Transcript	missense_variant	273	85	29	A/T	Gca/Aca	NA
29377095_204088	29377095	G	Thupl.29377095s0002	Thupl.29377095s0002.1.v3.1	Transcript	missense_variant	568	52	18	F/V	Ttt/Gtt	NA
29377095_204328	29377095	C	Thupl.29377095s0002	Thupl.29377095s0002.1.v3.1	Transcript	missense_variant	808	292	98	T/P	Act/Cct	NA
29377095_710777	29377095	T	Thupl.29377095s0004	Thupl.29377095s0004.1.v3.1	Transcript	missense_variant	770	332	111	T/I	aCc/aTc	NA
29377097_1010981	29377097	C	Thupl.29377097s0009	Thupl.29377097s0009.1.v3.1	Transcript	missense_variant	1600	1097	366	D/G	gAt/gGt	NA
29377097_1886231	29377097	A	Thupl.29377097s0014	Thupl.29377097s0014.1.v3.1	Transcript	missense_variant	1052	1010	337	T/K	aCa/aAa	NA
29377097_2883661	29377097	C	Thupl.29377097s0019	Thupl.29377097s0019.1.v3.1	Transcript	missense_variant	406	283	95	T/A	Act/Gct	NA
29377099_598142	29377099	A	Thupl.29377099s0003	Thupl.29377099s0003.1.v3.1	Transcript	missense_variant	4027	3663	1221	L/F	ttG/ttT	NA
29377099_598174	29377099	T	Thupl.29377099s0003	Thupl.29377099s0003.1.v3.1	Transcript	missense_variant	3995	3631	1211	L/I	Cta/Ata	NA
29377099_635149	29377099	C	Thupl.29377099s0003	Thupl.29377099s0003.1.v3.1	Transcript	missense_variant	3450	3086	1029	K/R	aAg/aGg	NA
29377099_704285	29377099	G	Thupl.29377099s0003	Thupl.29377099s0003.1.v3.1	Transcript	missense_variant	1520	1156	386	F/L	Ttt/Ctt	NA
29377099_1198373	29377099	A	Thupl.29377099s0006	Thupl.29377099s0006.1.v3.1	Transcript	missense_variant	337	337	113	G/C	Ggt/Tgt	NA
29377099_1198457	29377099	A	Thupl.29377099s0006	Thupl.29377099s0006.1.v3.1	Transcript	missense_variant	253	253	85	I/L	Ata/Tta	NA
29377099_1198538	29377099	T	Thupl.29377099s0006	Thupl.29377099s0006.1.v3.1	Transcript	missense_variant	172	172	58	P/T	Ccc/Acc	NA
29377099_2938694	29377099	G	Thupl.29377099s0019	Thupl.29377099s0019.1.v3.1	Transcript	missense_variant	202	68	23	N/S	aAt/aGt	NA
29377100_887885	29377100	A	Thupl.29377100s0009	Thupl.29377100s0009.1.v3.1	Transcript	missense_variant	891	352	118	D/Y	Gac/Tac	NA
29377105_1944518	29377105	G	Thupl.29377105s0007	Thupl.29377105s0007.1.v3.1	Transcript	missense_variant	1433	1066	356	F/L	Ttt/Ctt	NA
29377105_1944595	29377105	G	Thupl.29377105s0007	Thupl.29377105s0007.1.v3.1	Transcript	missense_variant	1356	989	330	V/A	gTc/gCc	NA
29377109_2370930	29377109	G	Thupl.29377109s0016	Thupl.29377109s0016.1.v3.1	Transcript	missense_variant	590	124	42	V/L	Gtg/Ctg	NA
29377110_3161042	29377110	T	Thupl.29377110s0012	Thupl.29377110s0012.1.v3.1	Transcript	missense_variant	573	455	152	R/K	aGg/aAg	NA
29377112_410905	29377112	T	Thupl.29377112s0007	Thupl.29377112s0007.1.v3.1	Transcript	missense_variant	2289	1783	595	S/C	Agt/Tgt	NA
29377112_1325822	29377112	T	Thupl.29377112s0011	Thupl.29377112s0011.1.v3.1	Transcript	missense_variant	183	53	18	A/E	gCa/gAa	NA
29377113_1403608	29377113	G	Thupl.29377113s0005	Thupl.29377113s0005.1.v3.1	Transcript	missense_variant	692	472	158	N/D	Aat/Gat	NA
29377118_705645	29377118	A	Thupl.29377118s0006	Thupl.29377118s0006.1.v3.1	Transcript	missense_variant	1192	881	294	R/K	aGa/aAa	NA
29377118_973830	29377118	G	Thupl.29377118s0007	Thupl.29377118s0007.1.v3.1	Transcript	missense_variant	335	80	27	V/A	gTt/gCt	NA
29377119_2598068	29377119	T	Thupl.29377119s0007	Thupl.29377119s0007.1.v3.1	Transcript	missense_variant	343	109	37	A/S	Gca/Tca	NA
29377120_114106	29377120	A	Thupl.29377120s0001	Thupl.29377120s0001.1.v3.1	Transcript	missense_variant	1494	1312	438	L/M	Ttg/Atg	NA
29377120_291038	29377120	A	Thupl.29377120s0001	Thupl.29377120s0001.1.v3.1	Transcript	missense_variant	3067	2885	962	R/H	cGc/cAc	NA
29377120_291040	29377120	C	Thupl.29377120s0001	Thupl.29377120s0001.1.v3.1	Transcript	missense_variant	3069	2887	963	S/P	Tca/Cca	NA
29377127_3670119	29377127	G	Thupl.29377127s0019	Thupl.29377127s0019.1.v3.1	Transcript	missense_variant	5234	4735	1579	G/R	Ggt/Cgt	NA
29377127_3674548	29377127	C	Thupl.29377127s0019	Thupl.29377127s0019.1.v3.1	Transcript	missense_variant	1289	790	264	I/V	Att/Gtt	NA
29377132_6978323	29377132	C	Thupl.29377132s0013	Thupl.29377132s0013.1.v3.1	Transcript	missense_variant	5359	4612	1538	T/P	Aca/Cca	NA
29377132_6980567	29377132	C	Thupl.29377132s0013	Thupl.29377132s0013.1.v3.1	Transcript	missense_variant	7603	6856	2286	I/L	Att/Ctt	NA
29377132_7153605	29377132	A	Thupl.29377132s0015	Thupl.29377132s0015.1.v3.1	Transcript	missense_variant	749	490	164	H/Y	Cat/Tat	NA
29377132_7424688	29377132	C	Thupl.29377132s0016	Thupl.29377132s0016.1.v3.1	Transcript	missense_variant	2221	2011	671	A/P	Gca/Cca	NA
29377132_7452845	29377132	G	Thupl.29377132s0016	Thupl.29377132s0016.1.v3.1	Transcript	missense_variant	2489	2279	760	E/G	gAg/gGg	NA
29377137_636274	29377137	G	Thupl.29377137s0004	Thupl.29377137s0004.1.v3.1	Transcript	missense_variant	856	856	286	S/P	Tca/Cca	NA
29377137_2225471	29377137	A	Thupl.29377137s0009	Thupl.29377137s0009.1.v3.1	Transcript	missense_variant	348	348	116	S/R	agT/agA	NA
29377139_2138918	29377139	T	Thupl.29377139s0007	Thupl.29377139s0007.1.v3.1	Transcript	missense_variant	2413	544	182	V/L	Gta/Tta	NA
29377141_346710	29377141	A	Thupl.29377141s0003	Thupl.29377141s0003.1.v3.1	Transcript	missense_variant	254	50	17	A/V	gCg/gTg	NA
29377145_668752	29377145	C	Thupl.29377145s0009	Thupl.29377145s0009.1.v3.1	Transcript	missense_variant	406	37	13	F/L	Ttt/Ctt	NA
29377151_3299356	29377151	C	Thupl.29377151s0009	Thupl.29377151s0009.1.v3.1	Transcript	missense_variant	698	625	209	Y/H	Tat/Cat	NA
29377152_912265	29377152	T	Thupl.29377152s0004	Thupl.29377152s0004.1.v3.1	Transcript	missense_variant	277	164	55	T/N	aCt/aAt	NA
29377152_1198687	29377152	T	Thupl.29377152s0005	Thupl.29377152s0005.1.v3.1	Transcript	missense_variant	1197	1006	336	Q/K	Cag/Aag	NA
29377169_2941532	29377169	A	Thupl.29377169s0021	Thupl.29377169s0021.1.v3.1	Transcript	missense_variant	1097	610	204	A/T	Gca/Aca	NA
29377170_6977367	29377170	T	Thupl.29377170s0036	Thupl.29377170s0036.1.v3.1	Transcript	missense_variant	2579	2272	758	F/I	Ttt/Att	NA
29377170_7690501	29377170	G	Thupl.29377170s0040	Thupl.29377170s0040.1.v3.1	Transcript	missense_variant	1076	907	303	I/V	Att/Gtt	NA
29377170_8690805	29377170	C	Thupl.29377170s0049	Thupl.29377170s0049.1.v3.1	Transcript	missense_variant	1583	1358	453	Q/R	cAa/cGa	NA
29377170_8690878	29377170	G	Thupl.29377170s0049	Thupl.29377170s0049.1.v3.1	Transcript	missense_variant	1510	1285	429	C/R	Tgt/Cgt	NA
29377170_9969011	29377170	T	Thupl.29377170s0054	Thupl.29377170s0054.1.v3.1	Transcript	missense_variant	79	79	27	P/T	Ccc/Acc	NA
29377171_3932082	29377171	A	Thupl.29377171s0011	Thupl.29377171s0011.1.v3.1	Transcript	missense_variant	2070	919	307	P/T	Cct/Act	NA
29377172_1263340	29377172	A	Thupl.29377172s0003	Thupl.29377172s0003.1.v3.1	Transcript	missense_variant	1226	1226	409	T/I	aCt/aTt	NA
29377172_1620210	29377172	T	Thupl.29377172s0004	Thupl.29377172s0004.1.v3.1	Transcript	missense_variant	3306	2539	847	L/F	Ctt/Ttt	NA
29377175_2827345	29377175	A	Thupl.29377175s0012	Thupl.29377175s0012.1.v3.1	Transcript	missense_variant	605	475	159	R/C	Cgt/Tgt	NA
29377190_487416	29377190	T	Thupl.29377190s0001	Thupl.29377190s0001.1.v3.1	Transcript	missense_variant	6238	5814	1938	E/D	gaA/gaT	NA
29377190_580150	29377190	G	Thupl.29377190s0003	Thupl.29377190s0003.1.v3.1	Transcript	missense_variant	530	509	170	V/A	gTt/gCt	NA
29377192_940526	29377192	A	Thupl.29377192s0003	Thupl.29377192s0003.1.v3.1	Transcript	missense_variant	116	116	39	G/E	gGg/gAg	NA
29377192_2254878	29377192	T	Thupl.29377192s0006	Thupl.29377192s0006.1.v3.1	Transcript	missense_variant	589	460	154	P/S	Cca/Tca	NA
29377193_1611235	29377193	A	Thupl.29377193s0007	Thupl.29377193s0007.4.v3.1	Transcript	missense_variant	834	22	8	I/F	Atc/Ttc	NA
29377198_2081962	29377198	C	Thupl.29377198s0015	Thupl.29377198s0015.1.v3.1	Transcript	missense_variant	128	17	6	I/T	aTt/aCt	NA
29377198_2081977	29377198	G	Thupl.29377198s0015	Thupl.29377198s0015.1.v3.1	Transcript	missense_variant	143	32	11	K/R	aAg/aGg	NA
29377198_2780454	29377198	G	Thupl.29377198s0021	Thupl.29377198s0021.1.v3.1	Transcript	missense_variant	1840	1030	344	K/Q	Aag/Cag	NA
29377199_138316	29377199	A	Thupl.29377199s0001	Thupl.29377199s0001.1.v3.1	Transcript	missense_variant	1891	1649	550	K/M	aAg/aTg	NA
29377199_140968	29377199	C	Thupl.29377199s0001	Thupl.29377199s0001.1.v3.1	Transcript	missense_variant	659	417	139	D/E	gaT/gaG	NA
29377199_303437	29377199	A	Thupl.29377199s0003	Thupl.29377199s0003.1.v3.1	Transcript	missense_variant	670	653	218	F/Y	tTt/tAt	NA
29377199_1313828	29377199	A	Thupl.29377199s0004	Thupl.29377199s0004.1.v3.1	Transcript	missense_variant	1019	839	280	H/L	cAt/cTt	NA
29377199_2199394	29377199	C	Thupl.29377199s0005	Thupl.29377199s0005.1.v3.1	Transcript	missense_variant	182	14	5	V/G	gTa/gGa	NA
29377203_1540548	29377203	C	Thupl.29377203s0002	Thupl.29377203s0002.1.v3.1	Transcript	missense_variant	2558	2081	694	A/G	gCg/gGg	NA
29377205_65142	29377205	A	Thupl.29377205s0004	Thupl.29377205s0004.1.v3.1	Transcript	missense_variant	1703	1178	393	Y/F	tAt/tTt	NA
29377205_65144	29377205	T	Thupl.29377205s0004	Thupl.29377205s0004.1.v3.1	Transcript	missense_variant	1701	1176	392	N/K	aaT/aaA	NA
29377205_102674	29377205	C	Thupl.29377205s0004	Thupl.29377205s0004.1.v3.1	Transcript	missense_variant	1652	1127	376	T/S	aCt/aGt	NA
29377205_137499	29377205	A	Thupl.29377205s0004	Thupl.29377205s0004.1.v3.1	Transcript	missense_variant	864	339	113	R/S	agG/agT	NA
29377205_137506	29377205	T	Thupl.29377205s0004	Thupl.29377205s0004.1.v3.1	Transcript	missense_variant	857	332	111	G/E	gGa/gAa	NA
29377205_137725	29377205	G	Thupl.29377205s0004	Thupl.29377205s0004.1.v3.1	Transcript	missense_variant	638	113	38	M/T	aTg/aCg	NA
29377205_225198	29377205	A	Thupl.29377205s0006	Thupl.29377205s0006.1.v3.1	Transcript	missense_variant	509	275	92	V/E	gTg/gAg	NA
29377205_557581	29377205	T	Thupl.29377205s0010	Thupl.29377205s0010.1.v3.1	Transcript	missense_variant	1375	1310	437	R/H	cGc/cAc	NA
29377205_580306	29377205	C	Thupl.29377205s0011	Thupl.29377205s0011.1.v3.1	Transcript	missense_variant	860	821	274	L/S	tTg/tCg	NA
29377207_339096	29377207	T	Thupl.29377207s0003	Thupl.29377207s0003.1.v3.1	Transcript	missense_variant	1007	602	201	S/N	aGt/aAt	NA
29377207_339196	29377207	C	Thupl.29377207s0003	Thupl.29377207s0003.1.v3.1	Transcript	missense_variant	907	502	168	L/V	Tta/Gta	NA
29377207_339210	29377207	A	Thupl.29377207s0003	Thupl.29377207s0003.1.v3.1	Transcript	missense_variant	893	488	163	T/M	aCg/aTg	NA
29377207_1648699	29377207	T	Thupl.29377207s0011	Thupl.29377207s0011.1.v3.1	Transcript	missense_variant	908	349	117	V/L	Gta/Tta	NA
29377214_4944644	29377214	T	Thupl.29377214s0021	Thupl.29377214s0021.1.v3.1	Transcript	missense_variant	756	419	140	T/M	aCg/aTg	NA
29377219_189052	29377219	C	Thupl.29377219s0002	Thupl.29377219s0002.1.v3.1	Transcript	missense_variant	2516	889	297	M/V	Atg/Gtg	NA
29377225_2810327	29377225	A	Thupl.29377225s0018	Thupl.29377225s0018.1.v3.1	Transcript	missense_variant	2767	2527	843	R/C	Cgt/Tgt	NA
29377225_3243710	29377225	C	Thupl.29377225s0023	Thupl.29377225s0023.1.v3.1	Transcript	missense_variant	2566	1318	440	L/V	Ttg/Gtg	NA
29377226_1277144	29377226	G	Thupl.29377226s0007	Thupl.29377226s0007.1.v3.1	Transcript	missense_variant	5485	4665	1555	D/E	gaC/gaG	NA
29377226_1409289	29377226	G	Thupl.29377226s0008	Thupl.29377226s0008.1.v3.1	Transcript	missense_variant	135	34	12	L/V	Cta/Gta	NA
29377226_1410168	29377226	C	Thupl.29377226s0008	Thupl.29377226s0008.1.v3.1	Transcript	missense_variant	528	427	143	S/P	Tct/Cct	NA
29377239_649065	29377239	G	Thupl.29377239s0013	Thupl.29377239s0013.1.v3.1	Transcript	missense_variant	154	40	14	L/V	Ttg/Gtg	NA
29377239_649581	29377239	A	Thupl.29377239s0013	Thupl.29377239s0013.1.v3.1	Transcript	missense_variant	398	284	95	R/H	cGt/cAt	NA
29377241_985196	29377241	C	Thupl.29377241s0007	Thupl.29377241s0007.1.v3.1	Transcript	missense_variant	1060	748	250	N/D	Aac/Gac	NA
29377241_1063854	29377241	T	Thupl.29377241s0007	Thupl.29377241s0007.1.v3.1	Transcript	missense_variant	329	17	6	S/Y	tCt/tAt	NA
29377241_2862395	29377241	A	Thupl.29377241s0011	Thupl.29377241s0011.1.v3.1	Transcript	missense_variant	88	88	30	H/Y	Cat/Tat	NA
29377242_509622	29377242	A	Thupl.29377242s0004	Thupl.29377242s0004.1.v3.1	Transcript	missense_variant	2925	2830	944	S/C	Agt/Tgt	NA
29377242_509656	29377242	A	Thupl.29377242s0004	Thupl.29377242s0004.1.v3.1	Transcript	missense_variant	2891	2796	932	M/I	atG/atT	NA
29377242_511514	29377242	G	Thupl.29377242s0004	Thupl.29377242s0004.1.v3.1	Transcript	missense_variant	1033	938	313	G/A	gGt/gCt	NA
29377247_85143	29377247	T	Thupl.29377247s0001	Thupl.29377247s0001.1.v3.1	Transcript	missense_variant	1908	1432	478	A/T	Gct/Act	NA
29377247_644098	29377247	G	Thupl.29377247s0003	Thupl.29377247s0003.1.v3.1	Transcript	missense_variant	1183	1032	344	L/F	ttA/ttC	NA
29377248_1910441	29377248	T	Thupl.29377248s0010	Thupl.29377248s0010.1.v3.1	Transcript	missense_variant	2818	2636	879	P/L	cCc/cTc	NA
29377248_2319427	29377248	A	Thupl.29377248s0012	Thupl.29377248s0012.2.v3.1	Transcript	missense_variant	483	32	11	G/D	gGt/gAt	NA
29377249_4884077	29377249	G	Thupl.29377249s0031	Thupl.29377249s0031.1.v3.1	Transcript	missense_variant	2494	2224	742	K/Q	Aag/Cag	NA
29377249_5341913	29377249	C	Thupl.29377249s0032	Thupl.29377249s0032.1.v3.1	Transcript	missense_variant	4708	4031	1344	N/S	aAc/aGc	NA
29377249_5341937	29377249	A	Thupl.29377249s0032	Thupl.29377249s0032.1.v3.1	Transcript	missense_variant	4684	4007	1336	S/F	tCc/tTc	NA
29377249_5342556	29377249	T	Thupl.29377249s0032	Thupl.29377249s0032.1.v3.1	Transcript	missense_variant	4065	3388	1130	V/I	Gta/Ata	NA
29377249_5346428	29377249	C	Thupl.29377249s0032	Thupl.29377249s0032.1.v3.1	Transcript	missense_variant	1362	685	229	L/V	Ctt/Gtt	NA
29377251_1521602	29377251	C	Thupl.29377251s0003	Thupl.29377251s0003.1.v3.1	Transcript	missense_variant	441	88	30	Y/D	Tat/Gat	NA
29377260_945335	29377260	G	Thupl.29377260s0006	Thupl.29377260s0006.1.v3.1	Transcript	missense_variant	748	414	138	I/M	atA/atG	NA
29377262_2788051	29377262	G	Thupl.29377262s0010	Thupl.29377262s0010.1.v3.1	Transcript	missense_variant	2934	2464	822	S/P	Tca/Cca	NA
29377264_63484	29377264	A	Thupl.29377264s0001	Thupl.29377264s0001.1.v3.1	Transcript	missense_variant	418	400	134	P/T	Ccc/Acc	NA
29377265_3534022	29377265	C	Thupl.29377265s0015	Thupl.29377265s0015.1.v3.1	Transcript	missense_variant	4689	4219	1407	N/H	Aat/Cat	NA
29377271_731302	29377271	G	Thupl.29377271s0003	Thupl.29377271s0003.1.v3.1	Transcript	missense_variant	576	383	128	D/G	gAt/gGt	NA
29377274_1505707	29377274	A	Thupl.29377274s0002	Thupl.29377274s0002.1.v3.1	Transcript	missense_variant	2962	2464	822	V/I	Gta/Ata	NA
29377274_1505765	29377274	T	Thupl.29377274s0002	Thupl.29377274s0002.1.v3.1	Transcript	missense_variant	3020	2522	841	A/V	gCg/gTg	NA
29377274_1583700	29377274	A	Thupl.29377274s0002	Thupl.29377274s0002.1.v3.1	Transcript	missense_variant	3982	3484	1162	V/I	Gtc/Atc	NA
29377274_2132176	29377274	G	Thupl.29377274s0006	Thupl.29377274s0006.1.v3.1	Transcript	missense_variant	957	88	30	S/A	Tct/Gct	NA
29377274_2132201	29377274	C	Thupl.29377274s0006	Thupl.29377274s0006.1.v3.1	Transcript	missense_variant	982	113	38	Y/S	tAc/tCc	NA
29377274_2132203	29377274	G	Thupl.29377274s0006	Thupl.29377274s0006.1.v3.1	Transcript	missense_variant	984	115	39	S/G	Agt/Ggt	NA
29377274_2178717	29377274	G	Thupl.29377274s0006	Thupl.29377274s0006.1.v3.1	Transcript	missense_variant	1650	781	261	S/A	Tct/Gct	NA
29377274_2275200	29377274	A	Thupl.29377274s0007	Thupl.29377274s0007.1.v3.1	Transcript	missense_variant	2980	2642	881	D/V	gAt/gTt	NA
29377274_2631419	29377274	C	Thupl.29377274s0009	Thupl.29377274s0009.1.v3.1	Transcript	missense_variant	507	197	66	I/S	aTc/aGc	NA
29377274_2631460	29377274	G	Thupl.29377274s0009	Thupl.29377274s0009.1.v3.1	Transcript	missense_variant	466	156	52	L/F	ttG/ttC	NA
29377275_228575	29377275	A	Thupl.29377275s0001	Thupl.29377275s0001.1.v3.1	Transcript	missense_variant	345	213	71	H/Q	caC/caA	NA
29377278_606648	29377278	G	Thupl.29377278s0007	Thupl.29377278s0007.1.v3.1	Transcript	missense_variant	1539	708	236	E/D	gaG/gaC	NA
29377278_623073	29377278	A	Thupl.29377278s0007	Thupl.29377278s0007.1.v3.1	Transcript	missense_variant	1283	452	151	A/V	gCa/gTa	NA
29377283_807004	29377283	A	Thupl.29377283s0004	Thupl.29377283s0004.1.v3.1	Transcript	missense_variant	989	953	318	A/V	gCt/gTt	NA
29377287_2406985	29377287	T	Thupl.29377287s0012	Thupl.29377287s0012.1.v3.1	Transcript	missense_variant	908	359	120	G/E	gGa/gAa	NA
29377287_2408642	29377287	G	Thupl.29377287s0012	Thupl.29377287s0012.1.v3.1	Transcript	missense_variant	722	173	58	R/P	cGc/cCc	NA
29377299_709440	29377299	T	Thupl.29377299s0002	Thupl.29377299s0002.1.v3.1	Transcript	missense_variant	1388	1115	372	A/E	gCg/gAg	NA
29377299_2975237	29377299	C	Thupl.29377299s0012	Thupl.29377299s0012.1.v3.1	Transcript	missense_variant	2369	1913	638	K/R	aAa/aGa	NA
29377299_3014190	29377299	T	Thupl.29377299s0012	Thupl.29377299s0012.1.v3.1	Transcript	missense_variant	1456	1000	334	L/M	Ctg/Atg	NA
29377300_941336	29377300	A	Thupl.29377300s0007	Thupl.29377300s0007.1.v3.1	Transcript	missense_variant	89	89	30	S/I	aGt/aTt	NA
29377303_1415260	29377303	C	Thupl.29377303s0004	Thupl.29377303s0004.1.v3.1	Transcript	missense_variant	2861	2685	895	L/F	ttG/ttC	NA
29377312_353240	29377312	A	Thupl.29377312s0002	Thupl.29377312s0002.1.v3.1	Transcript	missense_variant	2290	2058	686	M/I	atG/atT	NA
29377312_353908	29377312	G	Thupl.29377312s0002	Thupl.29377312s0002.1.v3.1	Transcript	missense_variant	2111	1879	627	I/L	Ata/Cta	NA
29377312_464504	29377312	C	Thupl.29377312s0002	Thupl.29377312s0002.1.v3.1	Transcript	missense_variant	882	650	217	N/S	aAt/aGt	NA
29377318_555956	29377318	C	Thupl.29377318s0003	Thupl.29377318s0003.1.v3.1	Transcript	missense_variant	459	106	36	K/E	Aaa/Gaa	NA
29377318_937795	29377318	T	Thupl.29377318s0006	Thupl.29377318s0006.1.v3.1	Transcript	missense_variant	421	202	68	V/L	Gtg/Ttg	NA
29377319_419367	29377319	C	Thupl.29377319s0005	Thupl.29377319s0005.1.v3.1	Transcript	missense_variant	228	148	50	M/V	Atg/Gtg	NA
29377325_140036	29377325	T	Thupl.29377325s0002	Thupl.29377325s0002.1.v3.1	Transcript	missense_variant	1215	858	286	E/D	gaA/gaT	NA
29377328_546991	29377328	A	Thupl.29377328s0004	Thupl.29377328s0004.1.v3.1	Transcript	missense_variant	367	206	69	R/H	cGc/cAc	NA
29377330_97899	29377330	C	Thupl.29377330s0001	Thupl.29377330s0001.1.v3.1	Transcript	missense_variant	1194	1040	347	Q/R	cAg/cGg	NA
29377330_924397	29377330	C	Thupl.29377330s0004	Thupl.29377330s0004.1.v3.1	Transcript	missense_variant	260	260	87	T/S	aCt/aGt	NA
29377333_1726050	29377333	A	Thupl.29377333s0006	Thupl.29377333s0006.1.v3.1	Transcript	missense_variant	4658	4658	1553	T/M	aCg/aTg	NA
29377336_580557	29377336	A	Thupl.29377336s0004	Thupl.29377336s0004.1.v3.1	Transcript	missense_variant	1143	791	264	A/V	gCc/gTc	NA
29377336_1284770	29377336	A	Thupl.29377336s0006	Thupl.29377336s0006.1.v3.1	Transcript	missense_variant	266	152	51	S/N	aGt/aAt	NA
29377337_966968	29377337	C	Thupl.29377337s0008	Thupl.29377337s0008.1.v3.1	Transcript	missense_variant	514	143	48	N/T	aAt/aCt	NA
29377337_984775	29377337	T	Thupl.29377337s0008	Thupl.29377337s0008.1.v3.1	Transcript	missense_variant	750	379	127	R/C	Cgt/Tgt	NA
29377337_1200393	29377337	T	Thupl.29377337s0009	Thupl.29377337s0009.1.v3.1	Transcript	missense_variant	459	56	19	L/Q	cTa/cAa	NA
29377341_1667308	29377341	A	Thupl.29377341s0004	Thupl.29377341s0004.1.v3.1	Transcript	missense_variant	243	16	6	G/S	Ggc/Agc	NA
29377343_898646	29377343	C	Thupl.29377343s0001	Thupl.29377343s0001.1.v3.1	Transcript	missense_variant	516	212	71	D/G	gAc/gGc	NA
29377343_898796	29377343	T	Thupl.29377343s0001	Thupl.29377343s0001.1.v3.1	Transcript	missense_variant	366	62	21	R/H	cGc/cAc	NA
29377343_2871206	29377343	G	Thupl.29377343s0009	Thupl.29377343s0009.1.v3.1	Transcript	missense_variant	951	436	146	V/L	Gtg/Ctg	NA
29377344_1241595	29377344	A	Thupl.29377344s0005	Thupl.29377344s0005.1.v3.1	Transcript	missense_variant	2060	1702	568	C/S	Tgt/Agt	NA
29377344_1241672	29377344	T	Thupl.29377344s0005	Thupl.29377344s0005.1.v3.1	Transcript	missense_variant	2137	1779	593	K/N	aaG/aaT	NA
29377349_364550	29377349	G	Thupl.29377349s0002	Thupl.29377349s0002.1.v3.1	Transcript	missense_variant	203	41	14	L/S	tTa/tCa	NA
29377349_1941774	29377349	A	Thupl.29377349s0006	Thupl.29377349s0006.1.v3.1	Transcript	missense_variant	678	353	118	R/K	aGg/aAg	NA
29377349_1942848	29377349	G	Thupl.29377349s0006	Thupl.29377349s0006.1.v3.1	Transcript	missense_variant	1163	838	280	L/V	Ctg/Gtg	NA
29377354_805593	29377354	T	Thupl.29377354s0003	Thupl.29377354s0003.1.v3.1	Transcript	missense_variant	877	517	173	L/I	Tta/Ata	NA
29377354_1099094	29377354	C	Thupl.29377354s0004	Thupl.29377354s0004.1.v3.1	Transcript	missense_variant	2145	2099	700	C/S	tGt/tCt	NA
29377354_1403826	29377354	C	Thupl.29377354s0005	Thupl.29377354s0005.1.v3.1	Transcript	missense_variant	1541	1210	404	F/L	Ttt/Ctt	NA
29377358_3742082	29377358	G	Thupl.29377358s0020	Thupl.29377358s0020.1.v3.1	Transcript	missense_variant	991	729	243	D/E	gaC/gaG	NA
29377365_48774	29377365	A	Thupl.29377365s0001	Thupl.29377365s0001.1.v3.1	Transcript	missense_variant	606	340	114	R/C	Cgc/Tgc	NA
29377365_119693	29377365	G	Thupl.29377365s0001	Thupl.29377365s0001.1.v3.1	Transcript	missense_variant	399	133	45	S/P	Tcg/Ccg	NA
29377365_354352	29377365	C	Thupl.29377365s0003	Thupl.29377365s0003.4.v3.1	Transcript	missense_variant	989	926	309	K/R	aAg/aGg	NA
29377366_767325	29377366	T	Thupl.29377366s0004	Thupl.29377366s0004.1.v3.1	Transcript	missense_variant	324	50	17	T/I	aCt/aTt	NA
29377367_1203741	29377367	G	Thupl.29377367s0002	Thupl.29377367s0002.1.v3.1	Transcript	missense_variant	2612	2060	687	V/G	gTg/gGg	NA
29377367_1249796	29377367	G	Thupl.29377367s0002	Thupl.29377367s0002.1.v3.1	Transcript	missense_variant	7181	6629	2210	Q/R	cAg/cGg	NA
29377372_11087	29377372	C	Thupl.29377372s0001	Thupl.29377372s0001.1.v3.1	Transcript	missense_variant	1233	996	332	N/K	aaT/aaG	NA
29377376_2845660	29377376	A	Thupl.29377376s0013	Thupl.29377376s0013.1.v3.1	Transcript	missense_variant	489	37	13	V/I	Gtt/Att	NA
29377376_2845702	29377376	A	Thupl.29377376s0013	Thupl.29377376s0013.1.v3.1	Transcript	missense_variant	531	79	27	A/T	Gcc/Acc	NA
29377381_2101079	29377381	C	Thupl.29377381s0010	Thupl.29377381s0010.1.v3.1	Transcript	missense_variant	1024	742	248	E/Q	Gag/Cag	NA
29377382_3823620	29377382	G	Thupl.29377382s0011	Thupl.29377382s0011.1.v3.1	Transcript	missense_variant	331	74	25	K/R	aAg/aGg	NA
29377393_1002275	29377393	G	Thupl.29377393s0012	Thupl.29377393s0012.1.v3.1	Transcript	missense_variant	25	25	9	E/Q	Gag/Cag	NA
29377393_1002277	29377393	G	Thupl.29377393s0012	Thupl.29377393s0012.1.v3.1	Transcript	missense_variant	23	23	8	R/T	aGa/aCa	NA
29377394_437413	29377394	A	Thupl.29377394s0004	Thupl.29377394s0004.1.v3.1	Transcript	missense_variant	405	405	135	E/D	gaA/gaT	NA
29377394_484968	29377394	C	Thupl.29377394s0004	Thupl.29377394s0004.1.v3.1	Transcript	missense_variant	46	46	16	S/A	Tca/Gca	NA
29377398_4815467	29377398	A	Thupl.29377398s0013	Thupl.29377398s0013.1.v3.1	Transcript	missense_variant	539	341	114	Y/F	tAc/tTc	NA
29377401_297700	29377401	T	Thupl.29377401s0002	Thupl.29377401s0002.1.v3.1	Transcript	missense_variant	1103	515	172	T/I	aCa/aTa	NA
29377401_1211601	29377401	G	Thupl.29377401s0006	Thupl.29377401s0006.1.v3.1	Transcript	missense_variant	566	238	80	T/A	Aca/Gca	NA
29377401_1688355	29377401	G	Thupl.29377401s0007	Thupl.29377401s0007.1.v3.1	Transcript	missense_variant	469	341	114	D/A	gAt/gCt	NA
29377401_1838546	29377401	T	Thupl.29377401s0009	Thupl.29377401s0009.1.v3.1	Transcript	missense_variant	343	206	69	C/F	tGc/tTc	NA
29377401_2116020	29377401	A	Thupl.29377401s0011	Thupl.29377401s0011.1.v3.1	Transcript	missense_variant	1612	1310	437	C/F	tGt/tTt	NA
29377401_2137120	29377401	C	Thupl.29377401s0011	Thupl.29377401s0011.1.v3.1	Transcript	missense_variant	1411	1109	370	N/S	aAt/aGt	NA
29377402_751948	29377402	A	Thupl.29377402s0004	Thupl.29377402s0004.1.v3.1	Transcript	missense_variant	1153	767	256	G/E	gGa/gAa	NA
29377402_2600163	29377402	C	Thupl.29377402s0011	Thupl.29377402s0011.1.v3.1	Transcript	missense_variant	254	23	8	I/T	aTt/aCt	NA
29377402_4444838	29377402	G	Thupl.29377402s0024	Thupl.29377402s0024.1.v3.1	Transcript	missense_variant	626	449	150	V/A	gTt/gCt	NA
29377402_6679617	29377402	C	Thupl.29377402s0038	Thupl.29377402s0038.1.v3.1	Transcript	missense_variant	2959	2630	877	L/S	tTa/tCa	NA
29377402_6680697	29377402	T	Thupl.29377402s0038	Thupl.29377402s0038.1.v3.1	Transcript	missense_variant	3925	3596	1199	S/I	aGc/aTc	NA
29377402_6682690	29377402	T	Thupl.29377402s0038	Thupl.29377402s0038.1.v3.1	Transcript	missense_variant	5593	5264	1755	A/V	gCa/gTa	NA
29377407_1084949	29377407	G	Thupl.29377407s0005	Thupl.29377407s0005.1.v3.1	Transcript	missense_variant	844	634	212	V/L	Gtt/Ctt	NA
29377415_1010745	29377415	C	Thupl.29377415s0007	Thupl.29377415s0007.1.v3.1	Transcript	missense_variant	693	482	161	D/G	gAt/gGt	NA
29377418_211310	29377418	A	Thupl.29377418s0001	Thupl.29377418s0001.1.v3.1	Transcript	missense_variant	1531	1236	412	Q/H	caA/caT	NA
29377418_2103244	29377418	T	Thupl.29377418s0012	Thupl.29377418s0012.1.v3.1	Transcript	missense_variant	688	430	144	L/F	Ctt/Ttt	NA
29377418_2844927	29377418	G	Thupl.29377418s0015	Thupl.29377418s0015.1.v3.1	Transcript	missense_variant	2001	1018	340	F/V	Ttt/Gtt	NA
29377418_3449906	29377418	G	Thupl.29377418s0017	Thupl.29377418s0017.1.v3.1	Transcript	missense_variant	395	167	56	K/R	aAg/aGg	NA
29377418_3452258	29377418	C	Thupl.29377418s0017	Thupl.29377418s0017.1.v3.1	Transcript	missense_variant	1621	1393	465	K/Q	Aag/Cag	NA
29377418_3452396	29377418	C	Thupl.29377418s0017	Thupl.29377418s0017.1.v3.1	Transcript	missense_variant	1759	1531	511	C/R	Tgt/Cgt	NA
29377418_3452454	29377418	G	Thupl.29377418s0017	Thupl.29377418s0017.1.v3.1	Transcript	missense_variant	1817	1589	530	I/R	aTa/aGa	NA
29377418_3474374	29377418	A	Thupl.29377418s0017	Thupl.29377418s0017.1.v3.1	Transcript	missense_variant	2263	2035	679	A/T	Gct/Act	NA
29377418_3474389	29377418	G	Thupl.29377418s0017	Thupl.29377418s0017.1.v3.1	Transcript	missense_variant	2278	2050	684	F/V	Ttt/Gtt	NA
29377418_3511466	29377418	T	Thupl.29377418s0017	Thupl.29377418s0017.1.v3.1	Transcript	missense_variant	3948	3720	1240	Q/H	caG/caT	NA
29377419_1225434	29377419	G	Thupl.29377419s0006	Thupl.29377419s0006.1.v3.1	Transcript	missense_variant	1813	1526	509	I/R	aTa/aGa	NA
29377421_3570652	29377421	C	Thupl.29377421s0011	Thupl.29377421s0011.1.v3.1	Transcript	missense_variant	1747	1741	581	L/V	Cta/Gta	NA
29377421_4295382	29377421	T	Thupl.29377421s0013	Thupl.29377421s0013.1.v3.1	Transcript	missense_variant	3159	2945	982	M/K	aTg/aAg	NA
29377421_4308279	29377421	G	Thupl.29377421s0013	Thupl.29377421s0013.1.v3.1	Transcript	missense_variant	809	595	199	A/P	Gca/Cca	NA
29377423_1084059	29377423	C	Thupl.29377423s0008	Thupl.29377423s0008.1.v3.1	Transcript	missense_variant	61	61	21	R/G	Cgt/Ggt	NA
29377424_516883	29377424	G	Thupl.29377424s0004	Thupl.29377424s0004.1.v3.1	Transcript	missense_variant	82	82	28	S/A	Tca/Gca	NA
29377424_627426	29377424	C	Thupl.29377424s0007	Thupl.29377424s0007.1.v3.1	Transcript	missense_variant	535	410	137	I/T	aTt/aCt	NA
29377428_856106	29377428	T	Thupl.29377428s0001	Thupl.29377428s0001.1.v3.1	Transcript	missense_variant	715	686	229	T/I	aCc/aTc	NA
29377428_856154	29377428	G	Thupl.29377428s0001	Thupl.29377428s0001.1.v3.1	Transcript	missense_variant	763	734	245	D/G	gAc/gGc	NA
29377428_856270	29377428	A	Thupl.29377428s0001	Thupl.29377428s0001.1.v3.1	Transcript	missense_variant	879	850	284	Y/N	Tac/Aac	NA
29377428_856303	29377428	T	Thupl.29377428s0001	Thupl.29377428s0001.1.v3.1	Transcript	missense_variant	912	883	295	T/S	Aca/Tca	NA
29377428_856333	29377428	C	Thupl.29377428s0001	Thupl.29377428s0001.1.v3.1	Transcript	missense_variant	942	913	305	S/P	Tca/Cca	NA
29377430_155453	29377430	A	Thupl.29377430s0001	Thupl.29377430s0001.2.v3.1	Transcript	missense_variant	320	248	83	S/N	aGt/aAt	NA
29377435_1658167	29377435	A	Thupl.29377435s0003	Thupl.29377435s0003.1.v3.1	Transcript	missense_variant	1321	329	110	A/V	gCa/gTa	NA
29377439_801492	29377439	A	Thupl.29377439s0010	Thupl.29377439s0010.1.v3.1	Transcript	missense_variant	88	61	21	F/I	Ttt/Att	NA
29377439_801513	29377439	T	Thupl.29377439s0010	Thupl.29377439s0010.1.v3.1	Transcript	missense_variant	109	82	28	R/C	Cgt/Tgt	NA
29377446_2267687	29377446	T	Thupl.29377446s0008	Thupl.29377446s0008.1.v3.1	Transcript	missense_variant	1784	1541	514	A/V	gCc/gTc	NA
29377450_2630903	29377450	G	Thupl.29377450s0007	Thupl.29377450s0007.1.v3.1	Transcript	missense_variant	757	363	121	N/K	aaT/aaG	NA
29377450_4121785	29377450	A	Thupl.29377450s0012	Thupl.29377450s0012.1.v3.1	Transcript	missense_variant	1284	1012	338	R/W	Cgg/Tgg	NA
29377455_832482	29377455	C	Thupl.29377455s0013	Thupl.29377455s0013.1.v3.1	Transcript	missense_variant	1500	1360	454	A/P	Gca/Cca	NA
29377459_1264437	29377459	G	Thupl.29377459s0005	Thupl.29377459s0005.1.v3.1	Transcript	missense_variant	1132	752	251	N/S	aAt/aGt	NA
29377462_3836097	29377462	C	Thupl.29377462s0013	Thupl.29377462s0013.1.v3.1	Transcript	missense_variant	4070	3314	1105	V/A	gTa/gCa	NA
29377462_3836179	29377462	G	Thupl.29377462s0013	Thupl.29377462s0013.1.v3.1	Transcript	missense_variant	4152	3396	1132	I/M	atC/atG	NA
29377464_2744871	29377464	T	Thupl.29377464s0010	Thupl.29377464s0010.1.v3.1	Transcript	missense_variant	453	269	90	R/K	aGa/aAa	NA
29377464_3152828	29377464	G	Thupl.29377464s0012	Thupl.29377464s0012.1.v3.1	Transcript	missense_variant	1209	935	312	V/A	gTt/gCt	NA
29377464_3604526	29377464	A	Thupl.29377464s0013	Thupl.29377464s0013.1.v3.1	Transcript	missense_variant	678	50	17	S/N	aGc/aAc	NA
29377464_4301350	29377464	T	Thupl.29377464s0017	Thupl.29377464s0017.1.v3.1	Transcript	missense_variant	330	41	14	A/E	gCa/gAa	NA
29377477_16081	29377477	A	Thupl.29377477s0001	Thupl.29377477s0001.1.v3.1	Transcript	missense_variant	1588	1280	427	P/L	cCc/cTc	NA
29377477_16091	29377477	T	Thupl.29377477s0001	Thupl.29377477s0001.1.v3.1	Transcript	missense_variant	1578	1270	424	A/T	Gca/Aca	NA
29377477_178132	29377477	A	Thupl.29377477s0001	Thupl.29377477s0001.1.v3.1	Transcript	missense_variant	772	464	155	A/V	gCt/gTt	NA
29377477_284358	29377477	A	Thupl.29377477s0003	Thupl.29377477s0003.1.v3.1	Transcript	missense_variant	1021	702	234	Q/H	caA/caT	NA
29377477_284423	29377477	C	Thupl.29377477s0003	Thupl.29377477s0003.1.v3.1	Transcript	missense_variant	956	637	213	S/A	Tcg/Gcg	NA
29377477_565822	29377477	A	Thupl.29377477s0004	Thupl.29377477s0004.1.v3.1	Transcript	missense_variant	270	37	13	V/I	Gtt/Att	NA
29377477_568208	29377477	T	Thupl.29377477s0004	Thupl.29377477s0004.1.v3.1	Transcript	missense_variant	1768	1535	512	A/V	gCc/gTc	NA
29377478_449535	29377478	T	Thupl.29377478s0004	Thupl.29377478s0004.1.v3.1	Transcript	missense_variant	396	139	47	L/F	Ctc/Ttc	NA
29377478_487512	29377478	A	Thupl.29377478s0004	Thupl.29377478s0004.1.v3.1	Transcript	missense_variant	1318	1061	354	I/N	aTt/aAt	NA
29377478_487581	29377478	G	Thupl.29377478s0004	Thupl.29377478s0004.1.v3.1	Transcript	missense_variant	1387	1130	377	A/G	gCa/gGa	NA
29377478_895800	29377478	T	Thupl.29377478s0005	Thupl.29377478s0005.1.v3.1	Transcript	missense_variant	1742	1426	476	T/S	Aca/Tca	NA
29377480_833187	29377480	A	Thupl.29377480s0001	Thupl.29377480s0001.1.v3.1	Transcript	missense_variant	576	230	77	L/Q	cTg/cAg	NA
29377480_833188	29377480	A	Thupl.29377480s0001	Thupl.29377480s0001.1.v3.1	Transcript	missense_variant	577	231	77	H/Q	caC/caA	NA
29377480_833189	29377480	A	Thupl.29377480s0001	Thupl.29377480s0001.1.v3.1	Transcript	missense_variant	578	232	78	V/I	Gta/Ata	NA
29377481_1923815	29377481	A	Thupl.29377481s0010	Thupl.29377481s0010.1.v3.1	Transcript	missense_variant	90	90	30	D/E	gaT/gaA	NA
29377482_1729039	29377482	A	Thupl.29377482s0008	Thupl.29377482s0008.1.v3.1	Transcript	missense_variant	327	14	5	S/I	aGc/aTc	NA
29377484_356677	29377484	G	Thupl.29377484s0003	Thupl.29377484s0003.1.v3.1	Transcript	missense_variant	521	141	47	I/M	atA/atG	NA
29377485_920185	29377485	T	Thupl.29377485s0004	Thupl.29377485s0004.1.v3.1	Transcript	missense_variant	2426	2132	711	N/I	aAc/aTc	NA
29377492_4591676	29377492	A	Thupl.29377492s0015	Thupl.29377492s0015.1.v3.1	Transcript	missense_variant	1641	1391	464	N/I	aAt/aTt	NA
29377492_4591698	29377492	G	Thupl.29377492s0015	Thupl.29377492s0015.1.v3.1	Transcript	missense_variant	1619	1369	457	F/L	Ttt/Ctt	NA
29377494_80080	29377494	G	Thupl.29377494s0001	Thupl.29377494s0001.1.v3.1	Transcript	missense_variant	325	166	56	S/G	Agc/Ggc	NA
29377494_487873	29377494	A	Thupl.29377494s0004	Thupl.29377494s0004.1.v3.1	Transcript	missense_variant	1613	1183	395	A/S	Gct/Tct	NA
29377494_1361658	29377494	T	Thupl.29377494s0007	Thupl.29377494s0007.1.v3.1	Transcript	missense_variant	29	13	5	S/C	Agc/Tgc	NA
29377496_1525926	29377496	G	Thupl.29377496s0016	Thupl.29377496s0016.1.v3.1	Transcript	missense_variant	920	707	236	S/C	tCt/tGt	NA
29377503_590496	29377503	C	Thupl.29377503s0007	Thupl.29377503s0007.1.v3.1	Transcript	missense_variant	1305	886	296	L/V	Ctg/Gtg	NA
29377508_594224	29377508	T	Thupl.29377508s0004	Thupl.29377508s0004.1.v3.1	Transcript	missense_variant	2099	1717	573	A/T	Gca/Aca	NA
29377508_604354	29377508	A	Thupl.29377508s0004	Thupl.29377508s0004.1.v3.1	Transcript	missense_variant	1586	1204	402	D/Y	Gat/Tat	NA
29377508_1355624	29377508	G	Thupl.29377508s0007	Thupl.29377508s0007.1.v3.1	Transcript	missense_variant	1400	1319	440	E/G	gAa/gGa	NA
29377513_613951	29377513	A	Thupl.29377513s0002	Thupl.29377513s0002.1.v3.1	Transcript	missense_variant	758	440	147	S/F	tCt/tTt	NA
29377513_614718	29377513	A	Thupl.29377513s0002	Thupl.29377513s0002.1.v3.1	Transcript	missense_variant	401	83	28	S/F	tCt/tTt	NA
29377513_614794	29377513	A	Thupl.29377513s0002	Thupl.29377513s0002.1.v3.1	Transcript	missense_variant	325	7	3	I/F	Att/Ttt	NA
29377513_2848035	29377513	T	Thupl.29377513s0012	Thupl.29377513s0012.1.v3.1	Transcript	missense_variant	250	154	52	I/F	Atc/Ttc	NA
29377513_2994401	29377513	C	Thupl.29377513s0012	Thupl.29377513s0012.1.v3.1	Transcript	missense_variant	724	628	210	S/P	Tca/Cca	NA
29377528_82199	29377528	C	Thupl.29377528s0001	Thupl.29377528s0001.1.v3.1	Transcript	missense_variant	526	190	64	D/H	Gac/Cac	NA
29377532_224799	29377532	G	Thupl.29377532s0001	Thupl.29377532s0001.1.v3.1	Transcript	missense_variant	1121	896	299	C/S	tGt/tCt	NA
29377532_328386	29377532	T	Thupl.29377532s0001	Thupl.29377532s0001.1.v3.1	Transcript	missense_variant	867	642	214	N/K	aaT/aaA	NA
29377533_546349	29377533	T	Thupl.29377533s0002	Thupl.29377533s0002.1.v3.1	Transcript	missense_variant	991	784	262	R/C	Cgc/Tgc	NA
29377534_1942092	29377534	A	Thupl.29377534s0012	Thupl.29377534s0012.1.v3.1	Transcript	missense_variant	257	41	14	G/E	gGa/gAa	NA
29377534_2068947	29377534	A	Thupl.29377534s0013	Thupl.29377534s0013.1.v3.1	Transcript	missense_variant	1348	938	313	P/L	cCt/cTt	NA
29377534_2091733	29377534	T	Thupl.29377534s0013	Thupl.29377534s0013.1.v3.1	Transcript	missense_variant	834	424	142	S/T	Tca/Aca	NA
29377534_4469911	29377534	A	Thupl.29377534s0025	Thupl.29377534s0025.1.v3.1	Transcript	missense_variant	1340	1337	446	G/E	gGa/gAa	NA
29377535_693383	29377535	T	Thupl.29377535s0001	Thupl.29377535s0001.1.v3.1	Transcript	missense_variant	2592	2279	760	S/F	tCt/tTt	NA
29377535_3562009	29377535	T	Thupl.29377535s0008	Thupl.29377535s0008.1.v3.1	Transcript	missense_variant	429	149	50	A/V	gCa/gTa	NA
29377535_3562329	29377535	G	Thupl.29377535s0008	Thupl.29377535s0008.1.v3.1	Transcript	missense_variant	749	469	157	N/D	Aat/Gat	NA
29377537_490950	29377537	A	Thupl.29377537s0005	Thupl.29377537s0005.1.v3.1	Transcript	missense_variant	47	47	16	S/N	aGc/aAc	NA
29377538_4173149	29377538	C	Thupl.29377538s0016	Thupl.29377538s0016.1.v3.1	Transcript	missense_variant	1949	1666	556	D/H	Gat/Cat	NA
29377538_4173150	29377538	T	Thupl.29377538s0016	Thupl.29377538s0016.1.v3.1	Transcript	missense_variant	1950	1667	556	D/V	gAt/gTt	NA
29377543_139099	29377543	A	Thupl.29377543s0002	Thupl.29377543s0002.1.v3.1	Transcript	missense_variant	803	664	222	E/K	Gag/Aag	NA
29377543_1112788	29377543	T	Thupl.29377543s0004	Thupl.29377543s0004.1.v3.1	Transcript	missense_variant	1137	863	288	R/L	cGt/cTt	NA
29377543_1123660	29377543	T	Thupl.29377543s0004	Thupl.29377543s0004.1.v3.1	Transcript	missense_variant	1286	1012	338	I/F	Att/Ttt	NA
29377543_1123684	29377543	G	Thupl.29377543s0004	Thupl.29377543s0004.1.v3.1	Transcript	missense_variant	1310	1036	346	M/V	Atg/Gtg	NA
29377543_2491709	29377543	A	Thupl.29377543s0014	Thupl.29377543s0014.1.v3.1	Transcript	missense_variant	871	764	255	T/M	aCg/aTg	NA
29377543_2491905	29377543	C	Thupl.29377543s0014	Thupl.29377543s0014.1.v3.1	Transcript	missense_variant	675	568	190	T/A	Acc/Gcc	NA
29377543_2491985	29377543	T	Thupl.29377543s0014	Thupl.29377543s0014.1.v3.1	Transcript	missense_variant	595	488	163	R/K	aGa/aAa	NA
29377544_354601	29377544	C	Thupl.29377544s0005	Thupl.29377544s0005.1.v3.1	Transcript	missense_variant	762	557	186	V/G	gTt/gGt	NA
29377544_354671	29377544	C	Thupl.29377544s0005	Thupl.29377544s0005.1.v3.1	Transcript	missense_variant	692	487	163	W/G	Tgg/Ggg	NA
29377544_850721	29377544	A	Thupl.29377544s0008	Thupl.29377544s0008.1.v3.1	Transcript	missense_variant	3855	3220	1074	L/F	Ctt/Ttt	NA
29377544_851338	29377544	C	Thupl.29377544s0008	Thupl.29377544s0008.1.v3.1	Transcript	missense_variant	3238	2603	868	K/R	aAg/aGg	NA
29377544_1055422	29377544	T	Thupl.29377544s0009	Thupl.29377544s0009.1.v3.1	Transcript	missense_variant	1035	602	201	L/Q	cTa/cAa	NA
29377547_1896280	29377547	T	Thupl.29377547s0005	Thupl.29377547s0005.1.v3.1	Transcript	missense_variant	343	59	20	I/N	aTt/aAt	NA
29377547_1896305	29377547	C	Thupl.29377547s0005	Thupl.29377547s0005.1.v3.1	Transcript	missense_variant	318	34	12	S/G	Agt/Ggt	NA
29377552_868861	29377552	G	Thupl.29377552s0003	Thupl.29377552s0003.1.v3.1	Transcript	missense_variant	2094	1684	562	N/H	Aac/Cac	NA
29377552_869280	29377552	C	Thupl.29377552s0003	Thupl.29377552s0003.1.v3.1	Transcript	missense_variant	1675	1265	422	K/R	aAa/aGa	NA
29377552_1646360	29377552	G	Thupl.29377552s0004	Thupl.29377552s0004.1.v3.1	Transcript	missense_variant	1591	1334	445	D/G	gAt/gGt	NA
29377552_1941244	29377552	A	Thupl.29377552s0006	Thupl.29377552s0006.1.v3.1	Transcript	missense_variant	957	620	207	A/V	gCa/gTa	NA
29377556_273474	29377556	C	Thupl.29377556s0003	Thupl.29377556s0003.1.v3.1	Transcript	missense_variant	1687	1394	465	A/G	gCt/gGt	NA
29377556_1582905	29377556	G	Thupl.29377556s0007	Thupl.29377556s0007.1.v3.1	Transcript	missense_variant	1272	1000	334	L/V	Ctc/Gtc	NA
29377558_2400695	29377558	C	Thupl.29377558s0020	Thupl.29377558s0020.1.v3.1	Transcript	missense_variant	2713	2515	839	I/V	Atc/Gtc	NA
29377559_3151474	29377559	C	Thupl.29377559s0012	Thupl.29377559s0012.11.v3.1	Transcript	missense_variant	1741	1487	496	C/S	tGt/tCt	NA
29377567_86091	29377567	C	Thupl.29377567s0001	Thupl.29377567s0001.1.v3.1	Transcript	missense_variant	817	643	215	T/A	Act/Gct	NA
29377567_105462	29377567	A	Thupl.29377567s0001	Thupl.29377567s0001.1.v3.1	Transcript	missense_variant	472	298	100	A/S	Gca/Tca	NA
29377567_279229	29377567	A	Thupl.29377567s0003	Thupl.29377567s0003.1.v3.1	Transcript	missense_variant	1824	895	299	L/M	Ctg/Atg	NA
29377567_279341	29377567	A	Thupl.29377567s0003	Thupl.29377567s0003.1.v3.1	Transcript	missense_variant	1936	1007	336	C/Y	tGt/tAt	NA
29377567_279343	29377567	C	Thupl.29377567s0003	Thupl.29377567s0003.1.v3.1	Transcript	missense_variant	1938	1009	337	V/L	Gtc/Ctc	NA
29377567_868613	29377567	G	Thupl.29377567s0009	Thupl.29377567s0009.1.v3.1	Transcript	missense_variant	2299	2012	671	L/P	cTa/cCa	NA
29377567_868614	29377567	T	Thupl.29377567s0009	Thupl.29377567s0009.1.v3.1	Transcript	missense_variant	2298	2011	671	E/K	Gaa/Aaa	NA
29377572_1357732	29377572	C	Thupl.29377572s0006	Thupl.29377572s0006.1.v3.1	Transcript	missense_variant	1629	1001	334	A/G	gCt/gGt	NA
29377573_801241	29377573	T	Thupl.29377573s0004	Thupl.29377573s0004.1.v3.1	Transcript	missense_variant	2087	2087	696	P/L	cCg/cTg	NA
29377578_2205427	29377578	C	Thupl.29377578s0004	Thupl.29377578s0004.1.v3.1	Transcript	missense_variant	4963	4625	1542	I/T	aTa/aCa	NA
29377579_599516	29377579	C	Thupl.29377579s0001	Thupl.29377579s0001.1.v3.1	Transcript	missense_variant	1714	1595	532	K/R	aAg/aGg	NA
29377579_599591	29377579	G	Thupl.29377579s0001	Thupl.29377579s0001.1.v3.1	Transcript	missense_variant	1639	1520	507	S/T	aGt/aCt	NA
29377580_808249	29377580	A	Thupl.29377580s0001	Thupl.29377580s0001.1.v3.1	Transcript	missense_variant	307	140	47	R/H	cGt/cAt	NA
29377583_2096336	29377583	T	Thupl.29377583s0015	Thupl.29377583s0015.1.v3.1	Transcript	missense_variant	302	12	4	M/I	atG/atA	NA
29377584_3181860	29377584	G	Thupl.29377584s0012	Thupl.29377584s0012.1.v3.1	Transcript	missense_variant	1728	1462	488	F/V	Ttt/Gtt	NA
29377584_3212565	29377584	A	Thupl.29377584s0012	Thupl.29377584s0012.1.v3.1	Transcript	missense_variant	2379	2113	705	A/T	Gct/Act	NA
29377584_3213554	29377584	G	Thupl.29377584s0012	Thupl.29377584s0012.1.v3.1	Transcript	missense_variant	2739	2473	825	T/A	Acg/Gcg	NA
29377587_4171602	29377587	G	Thupl.29377587s0016	Thupl.29377587s0016.1.v3.1	Transcript	missense_variant	753	151	51	V/L	Gtt/Ctt	NA
29377588_959573	29377588	C	Thupl.29377588s0006	Thupl.29377588s0006.1.v3.1	Transcript	missense_variant	1854	1714	572	F/V	Ttt/Gtt	NA
29377590_6615039	29377590	G	Thupl.29377590s0014	Thupl.29377590s0014.1.v3.1	Transcript	missense_variant	830	830	277	K/R	aAa/aGa	NA
29377600_1072241	29377600	C	Thupl.29377600s0003	Thupl.29377600s0003.1.v3.1	Transcript	missense_variant	357	32	11	P/R	cCa/cGa	NA
29377600_2758770	29377600	G	Thupl.29377600s0009	Thupl.29377600s0009.1.v3.1	Transcript	missense_variant	542	223	75	M/V	Atg/Gtg	NA
29377603_568510	29377603	A	Thupl.29377603s0002	Thupl.29377603s0002.1.v3.1	Transcript	missense_variant	420	370	124	D/N	Gat/Aat	NA
29377605_327404	29377605	G	Thupl.29377605s0002	Thupl.29377605s0002.1.v3.1	Transcript	missense_variant	740	653	218	K/R	aAa/aGa	NA
29377609_6178693	29377609	C	Thupl.29377609s0021	Thupl.29377609s0021.1.v3.1	Transcript	missense_variant	1658	1441	481	R/G	Cgt/Ggt	NA
29377613_1063390	29377613	T	Thupl.29377613s0007	Thupl.29377613s0007.1.v3.1	Transcript	missense_variant	372	187	63	H/Y	Cat/Tat	NA
29377618_955888	29377618	T	Thupl.29377618s0003	Thupl.29377618s0003.1.v3.1	Transcript	missense_variant	449	348	116	E/D	gaG/gaT	NA
29377618_956021	29377618	A	Thupl.29377618s0003	Thupl.29377618s0003.1.v3.1	Transcript	missense_variant	582	481	161	L/I	Ctc/Atc	NA
29377622_684985	29377622	G	Thupl.29377622s0002	Thupl.29377622s0002.1.v3.1	Transcript	missense_variant	890	719	240	K/R	aAa/aGa	NA
29377647_51861	29377647	C	Thupl.29377647s0001	Thupl.29377647s0001.1.v3.1	Transcript	missense_variant	822	485	162	R/P	cGa/cCa	NA
29377647_52061	29377647	G	Thupl.29377647s0001	Thupl.29377647s0001.1.v3.1	Transcript	missense_variant	1022	685	229	S/G	Agc/Ggc	NA
29377668_416721	29377668	A	Thupl.29377668s0004	Thupl.29377668s0004.1.v3.1	Transcript	missense_variant	1051	496	166	P/S	Ccc/Tcc	NA
29377672_1199250	29377672	T	Thupl.29377672s0006	Thupl.29377672s0006.1.v3.1	Transcript	missense_variant	934	934	312	A/T	Gca/Aca	NA
29377672_1964473	29377672	C	Thupl.29377672s0010	Thupl.29377672s0010.1.v3.1	Transcript	missense_variant	766	488	163	I/S	aTt/aGt	NA
29377672_1964477	29377672	G	Thupl.29377672s0010	Thupl.29377672s0010.1.v3.1	Transcript	missense_variant	762	484	162	K/Q	Aaa/Caa	NA
29377673_1816805	29377673	G	Thupl.29377673s0005	Thupl.29377673s0005.1.v3.1	Transcript	missense_variant	465	199	67	T/P	Act/Cct	NA
29377673_2070264	29377673	C	Thupl.29377673s0006	Thupl.29377673s0006.1.v3.1	Transcript	missense_variant	2250	1724	575	R/P	cGa/cCa	NA
29377676_177714	29377676	C	Thupl.29377676s0001	Thupl.29377676s0001.1.v3.1	Transcript	missense_variant	839	702	234	D/E	gaC/gaG	NA
29377676_179149	29377676	C	Thupl.29377676s0001	Thupl.29377676s0001.1.v3.1	Transcript	missense_variant	702	565	189	R/G	Cgt/Ggt	NA
29377680_1628163	29377680	C	Thupl.29377680s0007	Thupl.29377680s0007.1.v3.1	Transcript	missense_variant	200	108	36	N/K	aaC/aaG	NA
29377683_154743	29377683	T	Thupl.29377683s0002	Thupl.29377683s0002.1.v3.1	Transcript	missense_variant	2447	2006	669	S/Y	tCc/tAc	NA
29377684_4261458	29377684	C	Thupl.29377684s0013	Thupl.29377684s0013.1.v3.1	Transcript	missense_variant	2267	1541	514	L/R	cTa/cGa	NA
29377684_4262410	29377684	A	Thupl.29377684s0013	Thupl.29377684s0013.1.v3.1	Transcript	missense_variant	1315	589	197	R/W	Cgg/Tgg	NA
29377687_5741666	29377687	G	Thupl.29377687s0030	Thupl.29377687s0030.1.v3.1	Transcript	missense_variant	1080	670	224	E/Q	Gaa/Caa	NA
29377689_524270	29377689	C	Thupl.29377689s0005	Thupl.29377689s0005.1.v3.1	Transcript	missense_variant	359	16	6	G/R	Gga/Cga	NA
29377690_1154109	29377690	A	Thupl.29377690s0007	Thupl.29377690s0007.1.v3.1	Transcript	missense_variant	2144	1945	649	V/I	Gta/Ata	NA
29377693_1743372	29377693	T	Thupl.29377693s0008	Thupl.29377693s0008.1.v3.1	Transcript	missense_variant	776	559	187	V/I	Gta/Ata	NA
29377707_808019	29377707	A	Thupl.29377707s0006	Thupl.29377707s0006.1.v3.1	Transcript	missense_variant	1684	1079	360	S/F	tCc/tTc	NA
29377708_1471245	29377708	T	Thupl.29377708s0008	Thupl.29377708s0008.1.v3.1	Transcript	missense_variant	308	137	46	T/I	aCt/aTt	NA
29377712_766011	29377712	T	Thupl.29377712s0004	Thupl.29377712s0004.1.v3.1	Transcript	missense_variant	594	242	81	V/E	gTg/gAg	NA
29377713_528220	29377713	T	Thupl.29377713s0003	Thupl.29377713s0003.1.v3.1	Transcript	missense_variant	449	179	60	A/D	gCc/gAc	NA
29377713_528259	29377713	T	Thupl.29377713s0003	Thupl.29377713s0003.1.v3.1	Transcript	missense_variant	410	140	47	T/K	aCa/aAa	NA
29377714_327529	29377714	C	Thupl.29377714s0002	Thupl.29377714s0002.1.v3.1	Transcript	missense_variant	978	978	326	D/E	gaC/gaG	NA
29377719_704337	29377719	T	Thupl.29377719s0003	Thupl.29377719s0003.1.v3.1	Transcript	missense_variant	984	808	270	R/C	Cgc/Tgc	NA
29377719_2074570	29377719	G	Thupl.29377719s0008	Thupl.29377719s0008.1.v3.1	Transcript	missense_variant	872	535	179	A/P	Gct/Cct	NA
29377719_2582284	29377719	A	Thupl.29377719s0009	Thupl.29377719s0009.1.v3.1	Transcript	missense_variant	759	82	28	A/T	Gct/Act	NA
29377721_3582553	29377721	G	Thupl.29377721s0018	Thupl.29377721s0018.1.v3.1	Transcript	missense_variant	667	305	102	I/T	aTa/aCa	NA
29377721_4282292	29377721	T	Thupl.29377721s0019	Thupl.29377721s0019.1.v3.1	Transcript	missense_variant	1037	535	179	A/T	Gcg/Acg	NA
29377721_5022148	29377721	T	Thupl.29377721s0022	Thupl.29377721s0022.1.v3.1	Transcript	missense_variant	947	773	258	C/Y	tGt/tAt	NA
29377721_6005866	29377721	T	Thupl.29377721s0024	Thupl.29377721s0024.1.v3.1	Transcript	missense_variant	1320	764	255	P/Q	cCa/cAa	NA
29377726_1369218	29377726	A	Thupl.29377726s0006	Thupl.29377726s0006.1.v3.1	Transcript	missense_variant	4395	3766	1256	L/F	Ctt/Ttt	NA
29377726_1470058	29377726	A	Thupl.29377726s0006	Thupl.29377726s0006.1.v3.1	Transcript	missense_variant	3607	2978	993	R/M	aGg/aTg	NA
29377726_1568124	29377726	A	Thupl.29377726s0006	Thupl.29377726s0006.1.v3.1	Transcript	missense_variant	1687	1058	353	P/L	cCt/cTt	NA
29377731_299696	29377731	G	Thupl.29377731s0004	Thupl.29377731s0004.1.v3.1	Transcript	missense_variant	926	788	263	M/T	aTg/aCg	NA
29377731_299738	29377731	G	Thupl.29377731s0004	Thupl.29377731s0004.1.v3.1	Transcript	missense_variant	884	746	249	V/A	gTt/gCt	NA
29377737_1200785	29377737	T	Thupl.29377737s0009	Thupl.29377737s0009.1.v3.1	Transcript	missense_variant	958	794	265	L/H	cTt/cAt	NA
29377737_1200789	29377737	G	Thupl.29377737s0009	Thupl.29377737s0009.1.v3.1	Transcript	missense_variant	954	790	264	T/P	Act/Cct	NA
29377737_1200797	29377737	G	Thupl.29377737s0009	Thupl.29377737s0009.1.v3.1	Transcript	missense_variant	946	782	261	Q/P	cAa/cCa	NA
29377737_1204401	29377737	A	Thupl.29377737s0009	Thupl.29377737s0009.1.v3.1	Transcript	missense_variant	525	361	121	P/S	Cca/Tca	NA
29377737_1608066	29377737	G	Thupl.29377737s0010	Thupl.29377737s0010.1.v3.1	Transcript	missense_variant	914	905	302	I/T	aTa/aCa	NA
29377741_293496	29377741	T	Thupl.29377741s0002	Thupl.29377741s0002.1.v3.1	Transcript	missense_variant	213	11	4	R/L	cGc/cTc	NA
29377741_318707	29377741	C	Thupl.29377741s0002	Thupl.29377741s0002.1.v3.1	Transcript	missense_variant	407	205	69	F/L	Ttt/Ctt	NA
29377742_550204	29377742	G	Thupl.29377742s0005	Thupl.29377742s0005.1.v3.1	Transcript	missense_variant	1301	1033	345	R/G	Aga/Gga	NA
29377742_2377021	29377742	T	Thupl.29377742s0007	Thupl.29377742s0007.1.v3.1	Transcript	missense_variant	1075	185	62	S/L	tCa/tTa	NA
29377745_1570117	29377745	C	Thupl.29377745s0011	Thupl.29377745s0011.1.v3.1	Transcript	missense_variant	2352	2176	726	V/L	Gta/Cta	NA
29377746_283449	29377746	C	Thupl.29377746s0001	Thupl.29377746s0001.1.v3.1	Transcript	missense_variant	521	440	147	G/A	gGt/gCt	NA
29377746_291997	29377746	A	Thupl.29377746s0001	Thupl.29377746s0001.1.v3.1	Transcript	missense_variant	1381	1300	434	D/N	Gat/Aat	NA
29377747_852713	29377747	C	Thupl.29377747s0008	Thupl.29377747s0008.1.v3.1	Transcript	missense_variant	867	434	145	L/P	cTa/cCa	NA
29377749_6114496	29377749	C	Thupl.29377749s0015	Thupl.29377749s0015.1.v3.1	Transcript	missense_variant	2458	2150	717	Q/R	cAg/cGg	NA
29377750_1871466	29377750	A	Thupl.29377750s0009	Thupl.29377750s0009.1.v3.1	Transcript	missense_variant	244	16	6	L/F	Ctt/Ttt	NA
29377758_1658982	29377758	C	Thupl.29377758s0010	Thupl.29377758s0010.1.v3.1	Transcript	missense_variant	2213	1792	598	L/V	Ctc/Gtc	NA
29377760_3389984	29377760	C	Thupl.29377760s0022	Thupl.29377760s0022.1.v3.1	Transcript	missense_variant	4	4	2	S/P	Tcg/Ccg	NA
29377760_3389997	29377760	T	Thupl.29377760s0022	Thupl.29377760s0022.1.v3.1	Transcript	missense_variant	17	17	6	A/V	gCt/gTt	NA
29377763_57176	29377763	G	Thupl.29377763s0001	Thupl.29377763s0001.1.v3.1	Transcript	missense_variant	2123	1948	650	S/G	Agt/Ggt	NA
29377768_4091337	29377768	T	Thupl.29377768s0020	Thupl.29377768s0020.1.v3.1	Transcript	missense_variant	1449	1363	455	H/Y	Cat/Tat	NA
29377768_4091368	29377768	C	Thupl.29377768s0020	Thupl.29377768s0020.1.v3.1	Transcript	missense_variant	1480	1394	465	V/A	gTa/gCa	NA
29377768_4091422	29377768	A	Thupl.29377768s0020	Thupl.29377768s0020.3.v3.1	Transcript	missense_variant	1532	1448	483	R/Q	cGa/cAa	NA
29377770_382965	29377770	T	Thupl.29377770s0001	Thupl.29377770s0001.1.v3.1	Transcript	missense_variant	1383	1171	391	L/I	Tta/Ata	NA
29377770_409554	29377770	C	Thupl.29377770s0001	Thupl.29377770s0001.1.v3.1	Transcript	missense_variant	849	637	213	L/V	Ttg/Gtg	NA
29377770_409583	29377770	C	Thupl.29377770s0001	Thupl.29377770s0001.1.v3.1	Transcript	missense_variant	820	608	203	N/S	aAc/aGc	NA
29377775_982991	29377775	C	Thupl.29377775s0004	Thupl.29377775s0004.1.v3.1	Transcript	missense_variant	1393	1069	357	L/V	Cta/Gta	NA
29377779_270573	29377779	A	Thupl.29377779s0002	Thupl.29377779s0002.1.v3.1	Transcript	missense_variant	427	286	96	A/T	Gca/Aca	NA
29377779_470352	29377779	T	Thupl.29377779s0002	Thupl.29377779s0002.1.v3.1	Transcript	missense_variant	4756	4615	1539	D/Y	Gat/Tat	NA
29377779_496531	29377779	T	Thupl.29377779s0002	Thupl.29377779s0002.1.v3.1	Transcript	missense_variant	6244	6103	2035	H/Y	Cat/Tat	NA
29377781_1121669	29377781	C	Thupl.29377781s0006	Thupl.29377781s0006.1.v3.1	Transcript	missense_variant	1288	829	277	C/G	Tgt/Ggt	NA
29377781_1399246	29377781	C	Thupl.29377781s0007	Thupl.29377781s0007.1.v3.1	Transcript	missense_variant	574	197	66	Q/P	cAa/cCa	NA
29377784_2968554	29377784	T	Thupl.29377784s0009	Thupl.29377784s0009.1.v3.1	Transcript	missense_variant	1654	1478	493	G/E	gGg/gAg	NA
29377784_2977320	29377784	A	Thupl.29377784s0009	Thupl.29377784s0009.1.v3.1	Transcript	missense_variant	298	122	41	P/L	cCt/cTt	NA
29377784_3399789	29377784	A	Thupl.29377784s0011	Thupl.29377784s0011.1.v3.1	Transcript	missense_variant	1143	1072	358	S/T	Tca/Aca	NA
29377784_3787454	29377784	A	Thupl.29377784s0013	Thupl.29377784s0013.1.v3.1	Transcript	missense_variant	352	14	5	G/E	gGa/gAa	NA
29377784_3787459	29377784	T	Thupl.29377784s0013	Thupl.29377784s0013.1.v3.1	Transcript	missense_variant	357	19	7	M/L	Atg/Ttg	NA
29377784_3811106	29377784	A	Thupl.29377784s0013	Thupl.29377784s0013.1.v3.1	Transcript	missense_variant	756	418	140	P/T	Cct/Act	NA
29377784_3811420	29377784	G	Thupl.29377784s0013	Thupl.29377784s0013.1.v3.1	Transcript	missense_variant	854	516	172	H/Q	caC/caG	NA
29377784_3811423	29377784	T	Thupl.29377784s0013	Thupl.29377784s0013.1.v3.1	Transcript	missense_variant	857	519	173	E/D	gaA/gaT	NA
29377784_3811755	29377784	C	Thupl.29377784s0013	Thupl.29377784s0013.1.v3.1	Transcript	missense_variant	1092	754	252	F/L	Ttt/Ctt	NA
29377784_3815419	29377784	T	Thupl.29377784s0013	Thupl.29377784s0013.1.v3.1	Transcript	missense_variant	1204	866	289	T/I	aCa/aTa	NA
29377784_3957444	29377784	A	Thupl.29377784s0014	Thupl.29377784s0014.1.v3.1	Transcript	missense_variant	2874	2350	784	A/S	Gca/Tca	NA
29377784_4770552	29377784	G	Thupl.29377784s0016	Thupl.29377784s0016.1.v3.1	Transcript	missense_variant	367	106	36	T/A	Acc/Gcc	NA
29377784_5076944	29377784	G	Thupl.29377784s0019	Thupl.29377784s0019.1.v3.1	Transcript	missense_variant	808	347	116	T/S	aCt/aGt	NA
29377785_58241	29377785	G	Thupl.29377785s0001	Thupl.29377785s0001.1.v3.1	Transcript	missense_variant	2809	2336	779	E/G	gAg/gGg	NA
29377790_2948144	29377790	T	Thupl.29377790s0011	Thupl.29377790s0011.1.v3.1	Transcript	missense_variant	76	76	26	R/C	Cgc/Tgc	NA
29377790_2948185	29377790	T	Thupl.29377790s0011	Thupl.29377790s0011.1.v3.1	Transcript	missense_variant	117	117	39	L/F	ttG/ttT	NA
29377790_3755760	29377790	G	Thupl.29377790s0015	Thupl.29377790s0015.1.v3.1	Transcript	missense_variant	429	247	83	S/A	Tct/Gct	NA
29377790_3918280	29377790	C	Thupl.29377790s0017	Thupl.29377790s0017.1.v3.1	Transcript	missense_variant	1231	839	280	P/R	cCt/cGt	NA
29377790_3918383	29377790	A	Thupl.29377790s0017	Thupl.29377790s0017.1.v3.1	Transcript	missense_variant	1128	736	246	N/Y	Aat/Tat	NA
29377790_5843449	29377790	A	Thupl.29377790s0025	Thupl.29377790s0025.1.v3.1	Transcript	missense_variant	103	79	27	N/Y	Aat/Tat	NA
29377790_5845736	29377790	A	Thupl.29377790s0026	Thupl.29377790s0026.1.v3.1	Transcript	missense_variant	1432	976	326	P/S	Cca/Tca	NA
29377794_12394	29377794	G	Thupl.29377794s0001	Thupl.29377794s0001.1.v3.1	Transcript	missense_variant	1495	1495	499	F/L	Ttt/Ctt	NA
29377794_1176975	29377794	T	Thupl.29377794s0008	Thupl.29377794s0008.1.v3.1	Transcript	missense_variant	853	382	128	D/Y	Gat/Tat	NA
29377794_1176996	29377794	G	Thupl.29377794s0008	Thupl.29377794s0008.1.v3.1	Transcript	missense_variant	874	403	135	C/G	Tgc/Ggc	NA
29377794_1178134	29377794	G	Thupl.29377794s0008	Thupl.29377794s0008.1.v3.1	Transcript	missense_variant	1009	538	180	M/V	Atg/Gtg	NA
29377795_802460	29377795	C	Thupl.29377795s0002	Thupl.29377795s0002.1.v3.1	Transcript	missense_variant	1643	1355	452	V/G	gTc/gGc	NA
29377795_1570288	29377795	T	Thupl.29377795s0006	Thupl.29377795s0006.1.v3.1	Transcript	missense_variant	1916	1091	364	S/I	aGc/aTc	NA
29377795_1571187	29377795	G	Thupl.29377795s0006	Thupl.29377795s0006.1.v3.1	Transcript	missense_variant	2815	1990	664	T/A	Act/Gct	NA
29377795_1571470	29377795	C	Thupl.29377795s0006	Thupl.29377795s0006.1.v3.1	Transcript	missense_variant	3098	2273	758	V/A	gTt/gCt	NA
29377796_260006	29377796	G	Thupl.29377796s0002	Thupl.29377796s0002.1.v3.1	Transcript	missense_variant	324	109	37	Y/H	Tat/Cat	NA
29377796_1243800	29377796	G	Thupl.29377796s0007	Thupl.29377796s0007.1.v3.1	Transcript	missense_variant	379	299	100	K/R	aAa/aGa	NA
29377803_849359	29377803	A	Thupl.29377803s0004	Thupl.29377803s0004.1.v3.1	Transcript	missense_variant	747	176	59	A/E	gCa/gAa	NA
29377807_412928	29377807	A	Thupl.29377807s0005	Thupl.29377807s0005.1.v3.1	Transcript	missense_variant	391	190	64	I/F	Att/Ttt	NA
29377811_376068	29377811	G	Thupl.29377811s0002	Thupl.29377811s0002.1.v3.1	Transcript	missense_variant	3026	2416	806	E/Q	Gag/Cag	NA
29377813_768501	29377813	G	Thupl.29377813s0003	Thupl.29377813s0003.1.v3.1	Transcript	missense_variant	303	136	46	V/L	Gtg/Ctg	NA
29377832_144710	29377832	T	Thupl.29377832s0002	Thupl.29377832s0002.1.v3.1	Transcript	missense_variant	837	837	279	M/I	atG/atA	NA
29377832_1232161	29377832	T	Thupl.29377832s0011	Thupl.29377832s0011.1.v3.1	Transcript	missense_variant	282	49	17	P/S	Cca/Tca	NA
29377832_1232176	29377832	G	Thupl.29377832s0011	Thupl.29377832s0011.1.v3.1	Transcript	missense_variant	297	64	22	S/G	Agt/Ggt	NA
29377832_1795744	29377832	C	Thupl.29377832s0018	Thupl.29377832s0018.1.v3.1	Transcript	missense_variant	1563	1363	455	F/L	Ttc/Ctc	NA
29377837_1172770	29377837	C	Thupl.29377837s0013	Thupl.29377837s0013.1.v3.1	Transcript	missense_variant	2174	1765	589	P/A	Cca/Gca	NA
29377837_1184196	29377837	G	Thupl.29377837s0013	Thupl.29377837s0013.1.v3.1	Transcript	missense_variant	2076	1667	556	N/T	aAt/aCt	NA
29377837_1286270	29377837	A	Thupl.29377837s0013	Thupl.29377837s0013.1.v3.1	Transcript	missense_variant	1764	1355	452	Y/F	tAt/tTt	NA
29377840_591845	29377840	G	Thupl.29377840s0007	Thupl.29377840s0007.1.v3.1	Transcript	missense_variant	400	132	44	K/N	aaG/aaC	NA
29377840_591855	29377840	C	Thupl.29377840s0007	Thupl.29377840s0007.1.v3.1	Transcript	missense_variant	390	122	41	V/G	gTa/gGa	NA
29377840_1000691	29377840	G	Thupl.29377840s0011	Thupl.29377840s0011.1.v3.1	Transcript	missense_variant	966	808	270	T/P	Acg/Ccg	NA
29377843_136532	29377843	G	Thupl.29377843s0001	Thupl.29377843s0001.1.v3.1	Transcript	missense_variant	1401	963	321	L/F	ttG/ttC	NA
29377843_136605	29377843	G	Thupl.29377843s0001	Thupl.29377843s0001.1.v3.1	Transcript	missense_variant	1328	890	297	C/S	tGt/tCt	NA
29377850_62161	29377850	C	Thupl.29377850s0001	Thupl.29377850s0001.1.v3.1	Transcript	missense_variant	1657	1313	438	C/S	tGt/tCt	NA
29377863_26382	29377863	A	Thupl.29377863s0001	Thupl.29377863s0001.1.v3.1	Transcript	missense_variant	594	113	38	P/L	cCg/cTg	NA
29377863_26487	29377863	G	Thupl.29377863s0001	Thupl.29377863s0001.1.v3.1	Transcript	missense_variant	489	8	3	I/T	aTa/aCa	NA
29377870_193005	29377870	C	Thupl.29377870s0001	Thupl.29377870s0001.1.v3.1	Transcript	missense_variant	457	410	137	I/T	aTa/aCa	NA
29377870_204102	29377870	C	Thupl.29377870s0001	Thupl.29377870s0001.1.v3.1	Transcript	missense_variant	1855	1808	603	I/T	aTt/aCt	NA
29377870_204262	29377870	T	Thupl.29377870s0001	Thupl.29377870s0001.1.v3.1	Transcript	missense_variant	2015	1968	656	Q/H	caG/caT	NA
29377872_860651	29377872	A	Thupl.29377872s0002	Thupl.29377872s0002.1.v3.1	Transcript	missense_variant	3134	3030	1010	N/K	aaT/aaA	NA
29377881_640437	29377881	T	Thupl.29377881s0005	Thupl.29377881s0005.2.v3.1	Transcript	missense_variant	369	275	92	L/H	cTt/cAt	NA
29377886_516961	29377886	A	Thupl.29377886s0001	Thupl.29377886s0001.1.v3.1	Transcript	missense_variant	1297	1289	430	R/H	cGt/cAt	NA
29377887_2934	29377887	C	Thupl.29377887s0001	Thupl.29377887s0001.1.v3.1	Transcript	missense_variant	266	116	39	I/T	aTt/aCt	NA
29377890_330356	29377890	A	Thupl.29377890s0002	Thupl.29377890s0002.1.v3.1	Transcript	missense_variant	203	106	36	D/N	Gac/Aac	NA
29377890_330359	29377890	C	Thupl.29377890s0002	Thupl.29377890s0002.1.v3.1	Transcript	missense_variant	206	109	37	S/P	Tca/Cca	NA
29377892_987626	29377892	A	Thupl.29377892s0006	Thupl.29377892s0006.1.v3.1	Transcript	missense_variant	2036	1249	417	I/L	Ata/Tta	NA
29377892_987669	29377892	C	Thupl.29377892s0006	Thupl.29377892s0006.1.v3.1	Transcript	missense_variant	1993	1206	402	I/M	atT/atG	NA
29377905_134425	29377905	A	Thupl.29377905s0002	Thupl.29377905s0002.1.v3.1	Transcript	missense_variant	903	507	169	H/Q	caT/caA	NA
29377905_372150	29377905	G	Thupl.29377905s0004	Thupl.29377905s0004.1.v3.1	Transcript	missense_variant	2558	2474	825	I/S	aTc/aGc	NA
29377909_2370775	29377909	C	Thupl.29377909s0007	Thupl.29377909s0007.1.v3.1	Transcript	missense_variant	1371	1028	343	H/R	cAc/cGc	NA
29377912_92788	29377912	A	Thupl.29377912s0001	Thupl.29377912s0001.1.v3.1	Transcript	missense_variant	2524	1679	560	F/Y	tTt/tAt	NA
29377919_164866	29377919	T	Thupl.29377919s0004	Thupl.29377919s0004.1.v3.1	Transcript	missense_variant	638	540	180	F/L	ttT/ttA	NA
29377921_718896	29377921	G	Thupl.29377921s0003	Thupl.29377921s0003.1.v3.1	Transcript	missense_variant	464	152	51	I/S	aTt/aGt	NA
29377921_718955	29377921	A	Thupl.29377921s0003	Thupl.29377921s0003.1.v3.1	Transcript	missense_variant	523	211	71	S/T	Tcc/Acc	NA
29377921_873214	29377921	A	Thupl.29377921s0003	Thupl.29377921s0003.1.v3.1	Transcript	missense_variant	1082	770	257	R/H	cGc/cAc	NA
29377931_943068	29377931	T	Thupl.29377931s0003	Thupl.29377931s0003.1.v3.1	Transcript	missense_variant	299	299	100	S/L	tCg/tTg	NA
29377931_1893677	29377931	A	Thupl.29377931s0010	Thupl.29377931s0010.1.v3.1	Transcript	missense_variant	1700	1252	418	A/S	Gct/Tct	NA
29377931_1893739	29377931	C	Thupl.29377931s0010	Thupl.29377931s0010.1.v3.1	Transcript	missense_variant	1638	1190	397	P/R	cCt/cGt	NA
29377931_1893790	29377931	G	Thupl.29377931s0010	Thupl.29377931s0010.1.v3.1	Transcript	missense_variant	1587	1139	380	L/S	tTg/tCg	NA
29377941_549760	29377941	A	Thupl.29377941s0001	Thupl.29377941s0001.1.v3.1	Transcript	missense_variant	693	332	111	C/Y	tGc/tAc	NA
29377941_670484	29377941	C	Thupl.29377941s0001	Thupl.29377941s0001.1.v3.1	Transcript	missense_variant	2751	2390	797	N/T	aAt/aCt	NA
29377941_675427	29377941	C	Thupl.29377941s0001	Thupl.29377941s0001.1.v3.1	Transcript	missense_variant	3575	3214	1072	S/P	Tca/Cca	NA
29377949_370338	29377949	G	Thupl.29377949s0003	Thupl.29377949s0003.1.v3.1	Transcript	missense_variant	1261	653	218	K/R	aAg/aGg	NA
29377954_1645779	29377954	A	Thupl.29377954s0006	Thupl.29377954s0006.1.v3.1	Transcript	missense_variant	1599	1166	389	A/D	gCt/gAt	NA
29377971_2125647	29377971	C	Thupl.29377971s0013	Thupl.29377971s0013.1.v3.1	Transcript	missense_variant	1966	1829	610	A/G	gCa/gGa	NA
29377978_364535	29377978	T	Thupl.29377978s0003	Thupl.29377978s0003.1.v3.1	Transcript	missense_variant	929	398	133	P/H	cCc/cAc	NA
29377978_1683701	29377978	C	Thupl.29377978s0006	Thupl.29377978s0006.1.v3.1	Transcript	missense_variant	202	40	14	Y/H	Tat/Cat	NA
29377981_208993	29377981	T	Thupl.29377981s0002	Thupl.29377981s0002.1.v3.1	Transcript	missense_variant	1638	1362	454	E/D	gaA/gaT	NA
29377981_933306	29377981	T	Thupl.29377981s0009	Thupl.29377981s0009.1.v3.1	Transcript	missense_variant	810	133	45	P/S	Ccc/Tcc	NA
29377981_1676477	29377981	A	Thupl.29377981s0019	Thupl.29377981s0019.1.v3.1	Transcript	missense_variant	181	64	22	S/T	Tca/Aca	NA
29377981_1676516	29377981	T	Thupl.29377981s0019	Thupl.29377981s0019.1.v3.1	Transcript	missense_variant	220	103	35	A/S	Gca/Tca	NA
29377981_1775690	29377981	C	Thupl.29377981s0019	Thupl.29377981s0019.1.v3.1	Transcript	missense_variant	488	371	124	V/A	gTa/gCa	NA
29377986_1568994	29377986	G	Thupl.29377986s0010	Thupl.29377986s0010.1.v3.1	Transcript	missense_variant	917	836	279	Q/R	cAg/cGg	NA
29377990_640457	29377990	C	Thupl.29377990s0015	Thupl.29377990s0015.1.v3.1	Transcript	missense_variant	2112	1721	574	N/S	aAc/aGc	NA
29377992_611312	29377992	C	Thupl.29377992s0003	Thupl.29377992s0003.1.v3.1	Transcript	missense_variant	5577	5083	1695	G/R	Ggt/Cgt	NA
29377995_2368118	29377995	C	Thupl.29377995s0003	Thupl.29377995s0003.1.v3.1	Transcript	missense_variant	1921	1034	345	Q/P	cAg/cCg	NA
29378000_292427	29378000	G	Thupl.29378000s0001	Thupl.29378000s0001.1.v3.1	Transcript	missense_variant	1129	952	318	T/A	Aca/Gca	NA
29378000_293404	29378000	T	Thupl.29378000s0001	Thupl.29378000s0001.1.v3.1	Transcript	missense_variant	1238	1061	354	A/V	gCa/gTa	NA
29378000_293433	29378000	A	Thupl.29378000s0001	Thupl.29378000s0001.1.v3.1	Transcript	missense_variant	1267	1090	364	V/M	Gtg/Atg	NA
29378001_1172210	29378001	G	Thupl.29378001s0003	Thupl.29378001s0003.1.v3.1	Transcript	missense_variant	1206	878	293	Q/R	cAa/cGa	NA
29378005_80014	29378005	G	Thupl.29378005s0001	Thupl.29378005s0001.1.v3.1	Transcript	missense_variant	918	541	181	L/V	Ttg/Gtg	NA
29378005_193711	29378005	A	Thupl.29378005s0001	Thupl.29378005s0001.1.v3.1	Transcript	missense_variant	1558	1181	394	L/Q	cTg/cAg	NA
29378006_853068	29378006	G	Thupl.29378006s0002	Thupl.29378006s0002.1.v3.1	Transcript	missense_variant	262	88	30	V/L	Gtt/Ctt	NA
29378009_1231379	29378009	A	Thupl.29378009s0003	Thupl.29378009s0003.1.v3.1	Transcript	missense_variant	240	163	55	P/T	Ccc/Acc	NA
29378009_1231417	29378009	T	Thupl.29378009s0003	Thupl.29378009s0003.1.v3.1	Transcript	missense_variant	278	201	67	K/N	aaA/aaT	NA
29378015_1255416	29378015	A	Thupl.29378015s0006	Thupl.29378015s0006.1.v3.1	Transcript	missense_variant	3243	2764	922	V/I	Gtt/Att	NA
29378015_2176697	29378015	A	Thupl.29378015s0012	Thupl.29378015s0012.1.v3.1	Transcript	missense_variant	41	25	9	V/I	Gtt/Att	NA
29378015_2321695	29378015	T	Thupl.29378015s0016	Thupl.29378015s0016.1.v3.1	Transcript	missense_variant	851	820	274	L/M	Ctg/Atg	NA
29378015_3650507	29378015	C	Thupl.29378015s0022	Thupl.29378015s0022.1.v3.1	Transcript	missense_variant	656	656	219	N/S	aAt/aGt	NA
29378015_3650964	29378015	A	Thupl.29378015s0022	Thupl.29378015s0022.1.v3.1	Transcript	missense_variant	199	199	67	A/S	Gca/Tca	NA
29378015_4684367	29378015	C	Thupl.29378015s0026	Thupl.29378015s0026.2.v3.1	Transcript	missense_variant	932	884	295	I/T	aTt/aCt	NA
29378015_5350259	29378015	T	Thupl.29378015s0030	Thupl.29378015s0030.1.v3.1	Transcript	missense_variant	1360	733	245	M/L	Atg/Ttg	NA
29378015_5480242	29378015	C	Thupl.29378015s0032	Thupl.29378015s0032.1.v3.1	Transcript	missense_variant	394	34	12	I/V	Att/Gtt	NA
29378015_5798567	29378015	A	Thupl.29378015s0033	Thupl.29378015s0033.1.v3.1	Transcript	missense_variant	1613	1564	522	V/M	Gtg/Atg	NA
29378023_2449052	29378023	T	Thupl.29378023s0008	Thupl.29378023s0008.1.v3.1	Transcript	missense_variant	1471	1193	398	R/K	aGa/aAa	NA
29378023_3807226	29378023	T	Thupl.29378023s0014	Thupl.29378023s0014.1.v3.1	Transcript	missense_variant	505	271	91	V/L	Gtg/Ttg	NA
29378023_3859313	29378023	A	Thupl.29378023s0014	Thupl.29378023s0014.1.v3.1	Transcript	missense_variant	881	647	216	R/Q	cGa/cAa	NA
29378023_3939016	29378023	G	Thupl.29378023s0014	Thupl.29378023s0014.1.v3.1	Transcript	missense_variant	1285	1051	351	Q/E	Cag/Gag	NA
29378023_3939091	29378023	G	Thupl.29378023s0014	Thupl.29378023s0014.1.v3.1	Transcript	missense_variant	1360	1126	376	I/V	Att/Gtt	NA
29378023_3991002	29378023	A	Thupl.29378023s0014	Thupl.29378023s0014.1.v3.1	Transcript	missense_variant	1924	1690	564	L/M	Ttg/Atg	NA
29378023_3992487	29378023	A	Thupl.29378023s0014	Thupl.29378023s0014.1.v3.1	Transcript	missense_variant	2125	1891	631	D/N	Gat/Aat	NA
29378028_1354349	29378028	A	Thupl.29378028s0005	Thupl.29378028s0005.1.v3.1	Transcript	missense_variant	839	588	196	L/F	ttA/ttT	NA
29378028_1359538	29378028	T	Thupl.29378028s0005	Thupl.29378028s0005.1.v3.1	Transcript	missense_variant	258	7	3	H/N	Cac/Aac	NA
29378042_463362	29378042	G	Thupl.29378042s0003	Thupl.29378042s0003.1.v3.1	Transcript	missense_variant	340	124	42	S/A	Tct/Gct	NA
29378043_882810	29378043	T	Thupl.29378043s0003	Thupl.29378043s0003.1.v3.1	Transcript	missense_variant	261	193	65	L/F	Ctc/Ttc	NA
29378043_1143281	29378043	A	Thupl.29378043s0006	Thupl.29378043s0006.1.v3.1	Transcript	missense_variant	659	400	134	A/T	Gca/Aca	NA
29378043_1192678	29378043	T	Thupl.29378043s0006	Thupl.29378043s0006.1.v3.1	Transcript	missense_variant	2147	1888	630	S/C	Agt/Tgt	NA
29378043_1192704	29378043	A	Thupl.29378043s0006	Thupl.29378043s0006.1.v3.1	Transcript	missense_variant	2173	1914	638	F/L	ttC/ttA	NA
29378048_378953	29378048	G	Thupl.29378048s0005	Thupl.29378048s0005.1.v3.1	Transcript	missense_variant	1984	1178	393	V/A	gTa/gCa	NA
29378048_378961	29378048	A	Thupl.29378048s0005	Thupl.29378048s0005.1.v3.1	Transcript	missense_variant	1976	1170	390	K/N	aaA/aaT	NA
29378052_142721	29378052	T	Thupl.29378052s0002	Thupl.29378052s0002.1.v3.1	Transcript	missense_variant	514	514	172	M/L	Atg/Ttg	NA
29378052_1717497	29378052	C	Thupl.29378052s0009	Thupl.29378052s0009.1.v3.1	Transcript	missense_variant	2478	2171	724	T/S	aCt/aGt	NA
29378052_2079356	29378052	T	Thupl.29378052s0013	Thupl.29378052s0013.1.v3.1	Transcript	missense_variant	268	127	43	L/M	Ctg/Atg	NA
29378052_2728122	29378052	G	Thupl.29378052s0022	Thupl.29378052s0022.1.v3.1	Transcript	missense_variant	54	54	18	E/D	gaG/gaC	NA
29378052_3174232	29378052	A	Thupl.29378052s0025	Thupl.29378052s0025.1.v3.1	Transcript	missense_variant	1997	1493	498	G/E	gGg/gAg	NA
29378052_3290320	29378052	C	Thupl.29378052s0025	Thupl.29378052s0025.1.v3.1	Transcript	missense_variant	3272	2768	923	I/T	aTa/aCa	NA
29378057_252840	29378057	A	Thupl.29378057s0002	Thupl.29378057s0002.1.v3.1	Transcript	missense_variant	520	206	69	S/I	aGt/aTt	NA
29378057_252845	29378057	C	Thupl.29378057s0002	Thupl.29378057s0002.1.v3.1	Transcript	missense_variant	515	201	67	I/M	atA/atG	NA
29378057_1455720	29378057	C	Thupl.29378057s0008	Thupl.29378057s0008.1.v3.1	Transcript	missense_variant	366	293	98	N/S	aAc/aGc	NA
29378057_3167908	29378057	T	Thupl.29378057s0014	Thupl.29378057s0014.1.v3.1	Transcript	missense_variant	1033	943	315	V/I	Gtc/Atc	NA
29378058_1761175	29378058	A	Thupl.29378058s0006	Thupl.29378058s0006.1.v3.1	Transcript	missense_variant	2522	1715	572	G/E	gGa/gAa	NA
29378058_1807134	29378058	G	Thupl.29378058s0006	Thupl.29378058s0006.1.v3.1	Transcript	missense_variant	3179	2372	791	I/R	aTa/aGa	NA
29378059_617624	29378059	C	Thupl.29378059s0002	Thupl.29378059s0002.1.v3.1	Transcript	missense_variant	1984	1292	431	S/W	tCg/tGg	NA
29378064_4185357	29378064	A	Thupl.29378064s0023	Thupl.29378064s0023.1.v3.1	Transcript	missense_variant	5169	4867	1623	R/C	Cgt/Tgt	NA
29378064_4185440	29378064	T	Thupl.29378064s0023	Thupl.29378064s0023.1.v3.1	Transcript	missense_variant	5086	4784	1595	V/E	gTa/gAa	NA
29378064_4506660	29378064	T	Thupl.29378064s0024	Thupl.29378064s0024.1.v3.1	Transcript	missense_variant	1175	1018	340	A/T	Gct/Act	NA
29378064_4512092	29378064	A	Thupl.29378064s0024	Thupl.29378064s0024.1.v3.1	Transcript	missense_variant	234	77	26	S/F	tCc/tTc	NA
29378064_4581955	29378064	G	Thupl.29378064s0025	Thupl.29378064s0025.1.v3.1	Transcript	missense_variant	708	542	181	A/G	gCt/gGt	NA
29378066_597430	29378066	G	Thupl.29378066s0005	Thupl.29378066s0005.1.v3.1	Transcript	missense_variant	941	338	113	S/T	aGc/aCc	NA
29378070_5456038	29378070	A	Thupl.29378070s0015	Thupl.29378070s0015.1.v3.1	Transcript	missense_variant	317	15	5	E/D	gaG/gaT	NA
29378073_2605656	29378073	T	Thupl.29378073s0014	Thupl.29378073s0014.1.v3.1	Transcript	missense_variant	4014	3946	1316	L/I	Ctt/Att	NA
29378074_2194164	29378074	C	Thupl.29378074s0008	Thupl.29378074s0008.1.v3.1	Transcript	missense_variant	112	31	11	C/G	Tgt/Ggt	NA
29378083_57183	29378083	T	Thupl.29378083s0001	Thupl.29378083s0001.1.v3.1	Transcript	missense_variant	502	7	3	V/M	Gtg/Atg	NA
29378093_444779	29378093	A	Thupl.29378093s0001	Thupl.29378093s0001.1.v3.1	Transcript	missense_variant	1616	831	277	M/I	atG/atA	NA
29378095_664732	29378095	G	Thupl.29378095s0003	Thupl.29378095s0003.1.v3.1	Transcript	missense_variant	404	77	26	D/G	gAc/gGc	NA
29378095_664784	29378095	A	Thupl.29378095s0003	Thupl.29378095s0003.1.v3.1	Transcript	missense_variant	456	129	43	F/L	ttT/ttA	NA
29378097_183302	29378097	T	Thupl.29378097s0001	Thupl.29378097s0001.1.v3.1	Transcript	missense_variant	243	28	10	A/T	Gcc/Acc	NA
29378097_183313	29378097	C	Thupl.29378097s0001	Thupl.29378097s0001.1.v3.1	Transcript	missense_variant	232	17	6	N/S	aAc/aGc	NA
29378097_224005	29378097	G	Thupl.29378097s0002	Thupl.29378097s0002.1.v3.1	Transcript	missense_variant	5376	4603	1535	K/E	Aag/Gag	NA
29378097_224113	29378097	A	Thupl.29378097s0002	Thupl.29378097s0002.1.v3.1	Transcript	missense_variant	5484	4711	1571	V/I	Gtt/Att	NA
29378097_224309	29378097	G	Thupl.29378097s0002	Thupl.29378097s0002.2.v3.1	Transcript	missense_variant	5871	4798	1600	T/A	Acc/Gcc	NA
29378100_284992	29378100	T	Thupl.29378100s0001	Thupl.29378100s0001.1.v3.1	Transcript	missense_variant	100	90	30	W/C	tgG/tgT	NA
29378106_525274	29378106	C	Thupl.29378106s0003	Thupl.29378106s0003.1.v3.1	Transcript	missense_variant	1001	908	303	V/A	gTt/gCt	NA
29378106_600418	29378106	C	Thupl.29378106s0003	Thupl.29378106s0003.1.v3.1	Transcript	missense_variant	1061	968	323	F/S	tTt/tCt	NA
29378116_2826071	29378116	C	Thupl.29378116s0009	Thupl.29378116s0009.1.v3.1	Transcript	missense_variant	490	458	153	L/R	cTa/cGa	NA
29378116_3790075	29378116	G	Thupl.29378116s0022	Thupl.29378116s0022.1.v3.1	Transcript	missense_variant	167	60	20	D/E	gaC/gaG	NA
29378116_4331698	29378116	T	Thupl.29378116s0023	Thupl.29378116s0023.1.v3.1	Transcript	missense_variant	1480	1104	368	M/I	atG/atA	NA
29378116_5214150	29378116	T	Thupl.29378116s0026	Thupl.29378116s0026.1.v3.1	Transcript	missense_variant	841	636	212	K/N	aaA/aaT	NA
29378116_5214208	29378116	C	Thupl.29378116s0026	Thupl.29378116s0026.1.v3.1	Transcript	missense_variant	899	694	232	G/R	Ggc/Cgc	NA
29378119_1487809	29378119	C	Thupl.29378119s0010	Thupl.29378119s0010.1.v3.1	Transcript	missense_variant	592	277	93	N/H	Aac/Cac	NA
29378119_1566098	29378119	T	Thupl.29378119s0010	Thupl.29378119s0010.1.v3.1	Transcript	missense_variant	1570	1255	419	H/Y	Cat/Tat	NA
29378119_1566130	29378119	A	Thupl.29378119s0010	Thupl.29378119s0010.1.v3.1	Transcript	missense_variant	1602	1287	429	F/L	ttC/ttA	NA
29378119_1566146	29378119	A	Thupl.29378119s0010	Thupl.29378119s0010.1.v3.1	Transcript	missense_variant	1618	1303	435	F/I	Ttc/Atc	NA
29378131_1296279	29378131	T	Thupl.29378131s0003	Thupl.29378131s0003.1.v3.1	Transcript	missense_variant	19	19	7	T/S	Acg/Tcg	NA
29378131_1879417	29378131	C	Thupl.29378131s0005	Thupl.29378131s0005.1.v3.1	Transcript	missense_variant	161	19	7	F/L	Ttt/Ctt	NA
29378131_1879423	29378131	G	Thupl.29378131s0005	Thupl.29378131s0005.1.v3.1	Transcript	missense_variant	167	25	9	S/A	Tca/Gca	NA
29378131_1879496	29378131	C	Thupl.29378131s0005	Thupl.29378131s0005.1.v3.1	Transcript	missense_variant	240	98	33	M/T	aTg/aCg	NA
29378131_1879498	29378131	C	Thupl.29378131s0005	Thupl.29378131s0005.1.v3.1	Transcript	missense_variant	242	100	34	F/L	Ttt/Ctt	NA
29378131_2721719	29378131	T	Thupl.29378131s0013	Thupl.29378131s0013.1.v3.1	Transcript	missense_variant	2932	2806	936	D/N	Gat/Aat	NA
29378131_2721728	29378131	C	Thupl.29378131s0013	Thupl.29378131s0013.1.v3.1	Transcript	missense_variant	2923	2797	933	K/E	Aaa/Gaa	NA
29378132_720326	29378132	A	Thupl.29378132s0001	Thupl.29378132s0001.1.v3.1	Transcript	missense_variant	1559	1148	383	Y/F	tAc/tTc	NA
29378133_45401	29378133	C	Thupl.29378133s0001	Thupl.29378133s0001.1.v3.1	Transcript	missense_variant	2926	2087	696	I/T	aTa/aCa	NA
29378134_476558	29378134	G	Thupl.29378134s0002	Thupl.29378134s0002.1.v3.1	Transcript	missense_variant	1201	1071	357	K/N	aaA/aaC	NA
29378135_1612032	29378135	G	Thupl.29378135s0013	Thupl.29378135s0013.1.v3.1	Transcript	missense_variant	2208	536	179	V/A	gTa/gCa	NA
29378135_2004575	29378135	T	Thupl.29378135s0014	Thupl.29378135s0014.1.v3.1	Transcript	missense_variant	824	587	196	R/L	cGa/cTa	NA
29378135_2006110	29378135	G	Thupl.29378135s0014	Thupl.29378135s0014.1.v3.1	Transcript	missense_variant	1544	1307	436	H/R	cAt/cGt	NA
29378143_2438050	29378143	A	Thupl.29378143s0013	Thupl.29378143s0013.1.v3.1	Transcript	missense_variant	380	97	33	D/Y	Gac/Tac	NA
29378151_2310668	29378151	T	Thupl.29378151s0016	Thupl.29378151s0016.1.v3.1	Transcript	missense_variant	3524	3208	1070	H/N	Cac/Aac	NA
29378155_437247	29378155	T	Thupl.29378155s0001	Thupl.29378155s0001.1.v3.1	Transcript	missense_variant	1835	1651	551	A/T	Gca/Aca	NA
29378161_1413771	29378161	T	Thupl.29378161s0014	Thupl.29378161s0014.1.v3.1	Transcript	missense_variant	712	5	2	S/I	aGt/aTt	NA
29378161_1413773	29378161	A	Thupl.29378161s0014	Thupl.29378161s0014.1.v3.1	Transcript	missense_variant	714	7	3	S/T	Tcg/Acg	NA
29378161_1413774	29378161	T	Thupl.29378161s0014	Thupl.29378161s0014.1.v3.1	Transcript	missense_variant	715	8	3	S/L	tCg/tTg	NA
29378161_1413819	29378161	T	Thupl.29378161s0014	Thupl.29378161s0014.1.v3.1	Transcript	missense_variant	760	53	18	G/V	gGg/gTg	NA
29378161_1413855	29378161	G	Thupl.29378161s0014	Thupl.29378161s0014.1.v3.1	Transcript	missense_variant	796	89	30	N/S	aAt/aGt	NA
29378161_1884450	29378161	A	Thupl.29378161s0017	Thupl.29378161s0017.1.v3.1	Transcript	missense_variant	316	209	70	A/V	gCa/gTa	NA
29378161_2531945	29378161	C	Thupl.29378161s0018	Thupl.29378161s0018.1.v3.1	Transcript	missense_variant	167	134	45	Q/P	cAg/cCg	NA
29378162_5365341	29378162	C	Thupl.29378162s0013	Thupl.29378162s0013.1.v3.1	Transcript	missense_variant	2395	1960	654	T/P	Aca/Cca	NA
29378162_5880298	29378162	T	Thupl.29378162s0014	Thupl.29378162s0014.1.v3.1	Transcript	missense_variant	2401	1748	583	S/L	tCa/tTa	NA
29378162_5880520	29378162	T	Thupl.29378162s0014	Thupl.29378162s0014.1.v3.1	Transcript	missense_variant	2623	1970	657	A/V	gCt/gTt	NA
29378164_96108	29378164	A	Thupl.29378164s0001	Thupl.29378164s0001.1.v3.1	Transcript	missense_variant	1614	1358	453	S/F	tCt/tTt	NA
29378164_96207	29378164	A	Thupl.29378164s0001	Thupl.29378164s0001.1.v3.1	Transcript	missense_variant	1515	1259	420	A/V	gCg/gTg	NA
29378165_286190	29378165	G	Thupl.29378165s0005	Thupl.29378165s0005.1.v3.1	Transcript	missense_variant	385	94	32	T/P	Acc/Ccc	NA
29378165_286253	29378165	G	Thupl.29378165s0005	Thupl.29378165s0005.1.v3.1	Transcript	missense_variant	322	31	11	Y/H	Tac/Cac	NA
29378169_636195	29378169	T	Thupl.29378169s0005	Thupl.29378169s0005.1.v3.1	Transcript	missense_variant	4106	2950	984	H/Y	Cac/Tac	NA
29378171_450617	29378171	T	Thupl.29378171s0002	Thupl.29378171s0002.1.v3.1	Transcript	missense_variant	232	56	19	R/K	aGg/aAg	NA
29378171_621842	29378171	G	Thupl.29378171s0004	Thupl.29378171s0004.1.v3.1	Transcript	missense_variant	1544	1177	393	S/P	Tca/Cca	NA
29378174_643418	29378174	G	Thupl.29378174s0004	Thupl.29378174s0004.1.v3.1	Transcript	missense_variant	926	595	199	D/H	Gac/Cac	NA
29378174_643420	29378174	C	Thupl.29378174s0004	Thupl.29378174s0004.1.v3.1	Transcript	missense_variant	924	593	198	T/R	aCa/aGa	NA
29378174_643457	29378174	A	Thupl.29378174s0004	Thupl.29378174s0004.1.v3.1	Transcript	missense_variant	887	556	186	I/F	Att/Ttt	NA
29378174_645677	29378174	T	Thupl.29378174s0004	Thupl.29378174s0004.1.v3.1	Transcript	missense_variant	576	245	82	R/Q	cGg/cAg	NA
29378174_645720	29378174	T	Thupl.29378174s0004	Thupl.29378174s0004.1.v3.1	Transcript	missense_variant	533	202	68	L/M	Ctg/Atg	NA
29378174_645722	29378174	A	Thupl.29378174s0004	Thupl.29378174s0004.1.v3.1	Transcript	missense_variant	531	200	67	K/M	aAg/aTg	NA
29378174_963837	29378174	G	Thupl.29378174s0007	Thupl.29378174s0007.1.v3.1	Transcript	missense_variant	401	278	93	V/G	gTg/gGg	NA
29378174_963849	29378174	G	Thupl.29378174s0007	Thupl.29378174s0007.1.v3.1	Transcript	missense_variant	413	290	97	T/S	aCt/aGt	NA
29378174_1435949	29378174	T	Thupl.29378174s0009	Thupl.29378174s0009.1.v3.1	Transcript	missense_variant	335	61	21	L/M	Ctg/Atg	NA
29378174_2766889	29378174	A	Thupl.29378174s0013	Thupl.29378174s0013.1.v3.1	Transcript	missense_variant	422	89	30	P/L	cCg/cTg	NA
29378176_1225586	29378176	C	Thupl.29378176s0001	Thupl.29378176s0001.1.v3.1	Transcript	missense_variant	330	26	9	I/T	aTt/aCt	NA
29378177_83956	29378177	A	Thupl.29378177s0002	Thupl.29378177s0002.1.v3.1	Transcript	missense_variant	548	44	15	T/K	aCg/aAg	NA
29378181_412788	29378181	G	Thupl.29378181s0002	Thupl.29378181s0002.1.v3.1	Transcript	missense_variant	1072	515	172	E/G	gAa/gGa	NA
29378182_129040	29378182	T	Thupl.29378182s0001	Thupl.29378182s0001.1.v3.1	Transcript	missense_variant	357	256	86	H/Y	Cac/Tac	NA
29378182_184386	29378182	C	Thupl.29378182s0003	Thupl.29378182s0003.1.v3.1	Transcript	missense_variant	5116	4664	1555	E/G	gAg/gGg	NA
29378182_184704	29378182	C	Thupl.29378182s0003	Thupl.29378182s0003.1.v3.1	Transcript	missense_variant	4798	4346	1449	H/R	cAt/cGt	NA
29378182_200625	29378182	G	Thupl.29378182s0003	Thupl.29378182s0003.1.v3.1	Transcript	missense_variant	3087	2635	879	V/L	Gtt/Ctt	NA
29378182_229309	29378182	A	Thupl.29378182s0003	Thupl.29378182s0003.1.v3.1	Transcript	missense_variant	2110	1658	553	A/V	gCt/gTt	NA
29378184_891793	29378184	T	Thupl.29378184s0010	Thupl.29378184s0010.1.v3.1	Transcript	missense_variant	2563	2317	773	H/Y	Cat/Tat	NA
29378187_1071928	29378187	A	Thupl.29378187s0006	Thupl.29378187s0006.1.v3.1	Transcript	missense_variant	345	17	6	A/E	gCg/gAg	NA
29378197_164961	29378197	G	Thupl.29378197s0003	Thupl.29378197s0003.1.v3.1	Transcript	missense_variant	210	8	3	A/G	gCg/gGg	NA
29378197_164979	29378197	T	Thupl.29378197s0003	Thupl.29378197s0003.1.v3.1	Transcript	missense_variant	228	26	9	G/V	gGg/gTg	NA
29378199_1021392	29378199	G	Thupl.29378199s0007	Thupl.29378199s0007.1.v3.1	Transcript	missense_variant	446	20	7	D/G	gAt/gGt	NA
29378199_1075445	29378199	G	Thupl.29378199s0007	Thupl.29378199s0007.1.v3.1	Transcript	missense_variant	1679	1253	418	N/S	aAt/aGt	NA
29378199_4298062	29378199	A	Thupl.29378199s0018	Thupl.29378199s0018.1.v3.1	Transcript	missense_variant	1912	1514	505	R/Q	cGg/cAg	NA
29378199_4298115	29378199	T	Thupl.29378199s0018	Thupl.29378199s0018.1.v3.1	Transcript	missense_variant	1965	1567	523	V/L	Gta/Tta	NA
29378199_6400494	29378199	T	Thupl.29378199s0027	Thupl.29378199s0027.1.v3.1	Transcript	missense_variant	1471	1272	424	K/N	aaG/aaT	NA
29378206_697387	29378206	A	Thupl.29378206s0003	Thupl.29378206s0003.1.v3.1	Transcript	missense_variant	1360	1200	400	M/I	atG/atA	NA
29378206_701342	29378206	A	Thupl.29378206s0003	Thupl.29378206s0003.1.v3.1	Transcript	missense_variant	1688	1528	510	P/T	Ccc/Acc	NA
29378206_832780	29378206	G	Thupl.29378206s0005	Thupl.29378206s0005.1.v3.1	Transcript	missense_variant	670	155	52	K/R	aAa/aGa	NA
29378206_1063021	29378206	C	Thupl.29378206s0005	Thupl.29378206s0005.1.v3.1	Transcript	missense_variant	2290	1775	592	V/A	gTa/gCa	NA
29378207_1697554	29378207	A	Thupl.29378207s0010	Thupl.29378207s0010.1.v3.1	Transcript	missense_variant	2020	1491	497	K/N	aaA/aaT	NA
29378212_8284293	29378212	C	Thupl.29378212s0031	Thupl.29378212s0031.1.v3.1	Transcript	missense_variant	2157	182	61	Q/R	cAg/cGg	NA
29378215_3598845	29378215	T	Thupl.29378215s0013	Thupl.29378215s0013.1.v3.1	Transcript	missense_variant	344	107	36	S/N	aGt/aAt	NA
29378220_1289495	29378220	A	Thupl.29378220s0005	Thupl.29378220s0005.1.v3.1	Transcript	missense_variant	2675	2333	778	R/Q	cGa/cAa	NA
29378220_1289504	29378220	T	Thupl.29378220s0005	Thupl.29378220s0005.1.v3.1	Transcript	missense_variant	2684	2342	781	T/I	aCa/aTa	NA
29378226_4400185	29378226	A	Thupl.29378226s0018	Thupl.29378226s0018.1.v3.1	Transcript	missense_variant	348	308	103	A/V	gCa/gTa	NA
29378226_4400251	29378226	C	Thupl.29378226s0018	Thupl.29378226s0018.1.v3.1	Transcript	missense_variant	282	242	81	T/R	aCg/aGg	NA
29378226_4961228	29378226	A	Thupl.29378226s0024	Thupl.29378226s0024.1.v3.1	Transcript	missense_variant	2594	2069	690	T/I	aCt/aTt	NA
29378226_5009185	29378226	G	Thupl.29378226s0024	Thupl.29378226s0024.1.v3.1	Transcript	missense_variant	1697	1172	391	V/A	gTt/gCt	NA
29378234_320426	29378234	A	Thupl.29378234s0002	Thupl.29378234s0002.1.v3.1	Transcript	missense_variant	648	608	203	R/Q	cGa/cAa	NA
29378234_702383	29378234	A	Thupl.29378234s0004	Thupl.29378234s0004.1.v3.1	Transcript	missense_variant	1693	1532	511	D/V	gAt/gTt	NA
29378234_702384	29378234	T	Thupl.29378234s0004	Thupl.29378234s0004.1.v3.1	Transcript	missense_variant	1692	1531	511	D/N	Gat/Aat	NA
29378234_702512	29378234	G	Thupl.29378234s0004	Thupl.29378234s0004.1.v3.1	Transcript	missense_variant	1564	1403	468	K/T	aAg/aCg	NA
29378234_703527	29378234	G	Thupl.29378234s0004	Thupl.29378234s0004.1.v3.1	Transcript	missense_variant	549	388	130	E/Q	Gag/Cag	NA
29378234_928173	29378234	T	Thupl.29378234s0005	Thupl.29378234s0005.1.v3.1	Transcript	missense_variant	565	140	47	S/N	aGc/aAc	NA
29378234_928194	29378234	G	Thupl.29378234s0005	Thupl.29378234s0005.1.v3.1	Transcript	missense_variant	544	119	40	S/T	aGc/aCc	NA
29378234_928248	29378234	T	Thupl.29378234s0005	Thupl.29378234s0005.1.v3.1	Transcript	missense_variant	490	65	22	V/E	gTa/gAa	NA
29378241_180228	29378241	G	Thupl.29378241s0003	Thupl.29378241s0003.1.v3.1	Transcript	missense_variant	2413	608	203	G/A	gGt/gCt	NA
29378242_1530260	29378242	T	Thupl.29378242s0005	Thupl.29378242s0005.1.v3.1	Transcript	missense_variant	829	260	87	T/M	aCg/aTg	NA
29378243_783065	29378243	G	Thupl.29378243s0005	Thupl.29378243s0005.1.v3.1	Transcript	missense_variant	622	415	139	I/L	Att/Ctt	NA
29378244_857084	29378244	A	Thupl.29378244s0003	Thupl.29378244s0003.1.v3.1	Transcript	missense_variant	77	77	26	T/I	aCt/aTt	NA
29378249_606953	29378249	A	Thupl.29378249s0005	Thupl.29378249s0005.1.v3.1	Transcript	missense_variant	225	225	75	E/D	gaA/gaT	NA
29378258_3368096	29378258	G	Thupl.29378258s0007	Thupl.29378258s0007.1.v3.1	Transcript	missense_variant	999	517	173	M/V	Atg/Gtg	NA
29378258_4295536	29378258	G	Thupl.29378258s0011	Thupl.29378258s0011.1.v3.1	Transcript	missense_variant	1217	901	301	M/V	Atg/Gtg	NA
29378264_900339	29378264	T	Thupl.29378264s0002	Thupl.29378264s0002.1.v3.1	Transcript	missense_variant	2733	2014	672	T/S	Act/Tct	NA
29378269_36557	29378269	T	Thupl.29378269s0001	Thupl.29378269s0001.1.v3.1	Transcript	missense_variant	653	550	184	R/C	Cgc/Tgc	NA
29378269_236510	29378269	T	Thupl.29378269s0004	Thupl.29378269s0004.1.v3.1	Transcript	missense_variant	126	64	22	L/F	Ctc/Ttc	NA
29378269_236517	29378269	C	Thupl.29378269s0004	Thupl.29378269s0004.1.v3.1	Transcript	missense_variant	133	71	24	H/P	cAc/cCc	NA
29378269_236860	29378269	G	Thupl.29378269s0004	Thupl.29378269s0004.2.v3.1	Transcript	missense_variant	340	263	88	M/R	aTg/aGg	NA
29378269_1136483	29378269	C	Thupl.29378269s0006	Thupl.29378269s0006.1.v3.1	Transcript	missense_variant	3044	2591	864	K/R	aAa/aGa	NA
29378269_1136856	29378269	T	Thupl.29378269s0006	Thupl.29378269s0006.1.v3.1	Transcript	missense_variant	2671	2218	740	A/T	Gct/Act	NA
29378275_21557	29378275	C	Thupl.29378275s0001	Thupl.29378275s0001.1.v3.1	Transcript	missense_variant	3123	392	131	I/T	aTt/aCt	NA
29378276_400686	29378276	G	Thupl.29378276s0004	Thupl.29378276s0004.1.v3.1	Transcript	missense_variant	2232	1770	590	I/M	atA/atG	NA
29378279_1649175	29378279	A	Thupl.29378279s0012	Thupl.29378279s0012.1.v3.1	Transcript	missense_variant	589	363	121	Q/H	caG/caT	NA
29378279_1649191	29378279	C	Thupl.29378279s0012	Thupl.29378279s0012.1.v3.1	Transcript	missense_variant	573	347	116	Q/R	cAg/cGg	NA
29378279_1649300	29378279	G	Thupl.29378279s0012	Thupl.29378279s0012.1.v3.1	Transcript	missense_variant	464	238	80	S/P	Tct/Cct	NA
29378279_1960508	29378279	G	Thupl.29378279s0013	Thupl.29378279s0013.1.v3.1	Transcript	missense_variant	1015	784	262	R/G	Cga/Gga	NA
29378279_8524243	29378279	A	Thupl.29378279s0027	Thupl.29378279s0027.1.v3.1	Transcript	missense_variant	4364	3933	1311	F/L	ttT/ttA	NA
29378279_9837069	29378279	G	Thupl.29378279s0032	Thupl.29378279s0032.1.v3.1	Transcript	missense_variant	1399	1145	382	Q/R	cAa/cGa	NA
29378279_9837494	29378279	A	Thupl.29378279s0032	Thupl.29378279s0032.1.v3.1	Transcript	missense_variant	1824	1570	524	V/I	Gtt/Att	NA
29378279_9837553	29378279	T	Thupl.29378279s0032	Thupl.29378279s0032.1.v3.1	Transcript	missense_variant	1883	1629	543	K/N	aaA/aaT	NA
29378279_9837662	29378279	A	Thupl.29378279s0032	Thupl.29378279s0032.1.v3.1	Transcript	missense_variant	1992	1738	580	A/T	Gct/Act	NA
29378279_9837666	29378279	T	Thupl.29378279s0032	Thupl.29378279s0032.1.v3.1	Transcript	missense_variant	1996	1742	581	S/F	tCt/tTt	NA
29378286_467129	29378286	G	Thupl.29378286s0002	Thupl.29378286s0002.1.v3.1	Transcript	missense_variant	2645	1396	466	L/V	Cta/Gta	NA
29378286_519560	29378286	G	Thupl.29378286s0002	Thupl.29378286s0002.1.v3.1	Transcript	missense_variant	3269	2020	674	K/E	Aaa/Gaa	NA
29378287_2494708	29378287	A	Thupl.29378287s0024	Thupl.29378287s0024.1.v3.1	Transcript	missense_variant	2295	1891	631	V/I	Gtc/Atc	NA
29378294_993978	29378294	C	Thupl.29378294s0008	Thupl.29378294s0008.1.v3.1	Transcript	missense_variant	2447	2211	737	I/M	atA/atG	NA
29378294_994178	29378294	T	Thupl.29378294s0008	Thupl.29378294s0008.1.v3.1	Transcript	missense_variant	2247	2011	671	C/S	Tgt/Agt	NA
29378294_994210	29378294	G	Thupl.29378294s0008	Thupl.29378294s0008.1.v3.1	Transcript	missense_variant	2215	1979	660	V/A	gTc/gCc	NA
29378294_994223	29378294	T	Thupl.29378294s0008	Thupl.29378294s0008.1.v3.1	Transcript	missense_variant	2202	1966	656	L/M	Ttg/Atg	NA
29378296_191435	29378296	T	Thupl.29378296s0001	Thupl.29378296s0001.1.v3.1	Transcript	missense_variant	473	187	63	V/I	Gtt/Att	NA
29378297_265018	29378297	T	Thupl.29378297s0004	Thupl.29378297s0004.1.v3.1	Transcript	missense_variant	1825	1564	522	H/Y	Cat/Tat	NA
29378297_265031	29378297	T	Thupl.29378297s0004	Thupl.29378297s0004.1.v3.1	Transcript	missense_variant	1838	1577	526	A/V	gCg/gTg	NA
29378303_546755	29378303	G	Thupl.29378303s0001	Thupl.29378303s0001.1.v3.1	Transcript	missense_variant	146	146	49	W/S	tGg/tCg	NA
29378303_546774	29378303	T	Thupl.29378303s0001	Thupl.29378303s0001.1.v3.1	Transcript	missense_variant	127	127	43	P/T	Ccc/Acc	NA
29378303_1212645	29378303	C	Thupl.29378303s0003	Thupl.29378303s0003.1.v3.1	Transcript	missense_variant	2695	2426	809	N/S	aAt/aGt	NA
29378303_1219568	29378303	A	Thupl.29378303s0003	Thupl.29378303s0003.1.v3.1	Transcript	missense_variant	2068	1799	600	D/V	gAc/gTc	NA
29378303_2358459	29378303	A	Thupl.29378303s0005	Thupl.29378303s0005.1.v3.1	Transcript	missense_variant	603	460	154	V/I	Gta/Ata	NA
29378303_2358472	29378303	C	Thupl.29378303s0005	Thupl.29378303s0005.1.v3.1	Transcript	missense_variant	616	473	158	L/P	cTc/cCc	NA
29378304_920186	29378304	G	Thupl.29378304s0004	Thupl.29378304s0004.1.v3.1	Transcript	missense_variant	1706	1082	361	C/S	tGt/tCt	NA
29378305_292308	29378305	G	Thupl.29378305s0003	Thupl.29378305s0003.1.v3.1	Transcript	missense_variant	504	86	29	F/S	tTc/tCc	NA
29378318_2665867	29378318	T	Thupl.29378318s0005	Thupl.29378318s0005.1.v3.1	Transcript	missense_variant	540	527	176	S/N	aGt/aAt	NA
29378318_3569643	29378318	C	Thupl.29378318s0008	Thupl.29378318s0008.1.v3.1	Transcript	missense_variant	700	677	226	L/S	tTa/tCa	NA
29378318_3691707	29378318	G	Thupl.29378318s0011	Thupl.29378318s0011.1.v3.1	Transcript	missense_variant	215	76	26	I/V	Ata/Gta	NA
29378318_3691767	29378318	A	Thupl.29378318s0011	Thupl.29378318s0011.1.v3.1	Transcript	missense_variant	275	136	46	S/T	Tca/Aca	NA
29378322_1003403	29378322	C	Thupl.29378322s0003	Thupl.29378322s0003.1.v3.1	Transcript	missense_variant	904	841	281	L/V	Ctt/Gtt	NA
29378322_1058914	29378322	C	Thupl.29378322s0003	Thupl.29378322s0003.1.v3.1	Transcript	missense_variant	370	307	103	N/D	Aat/Gat	NA
29378326_539293	29378326	A	Thupl.29378326s0008	Thupl.29378326s0008.1.v3.1	Transcript	missense_variant	949	706	236	V/I	Gtt/Att	NA
29378336_65143	29378336	G	Thupl.29378336s0001	Thupl.29378336s0001.1.v3.1	Transcript	missense_variant	333	14	5	I/S	aTc/aGc	NA
29378336_65220	29378336	T	Thupl.29378336s0001	Thupl.29378336s0001.1.v3.1	Transcript	missense_variant	410	91	31	H/Y	Cat/Tat	NA
29378339_3476437	29378339	T	Thupl.29378339s0019	Thupl.29378339s0019.1.v3.1	Transcript	missense_variant	2442	1916	639	A/V	gCc/gTc	NA
29378343_567385	29378343	T	Thupl.29378343s0003	Thupl.29378343s0003.1.v3.1	Transcript	missense_variant	4613	4139	1380	R/H	cGt/cAt	NA
29378343_567449	29378343	C	Thupl.29378343s0003	Thupl.29378343s0003.1.v3.1	Transcript	missense_variant	4549	4075	1359	N/D	Aat/Gat	NA
29378345_97992	29378345	C	Thupl.29378345s0001	Thupl.29378345s0001.1.v3.1	Transcript	missense_variant	6218	6158	2053	L/P	cTa/cCa	NA
29378347_1359450	29378347	A	Thupl.29378347s0006	Thupl.29378347s0006.1.v3.1	Transcript	missense_variant	1021	997	333	G/S	Ggt/Agt	NA
29378351_1307090	29378351	G	Thupl.29378351s0003	Thupl.29378351s0003.1.v3.1	Transcript	missense_variant	812	781	261	I/V	Att/Gtt	NA
29378351_1310204	29378351	G	Thupl.29378351s0003	Thupl.29378351s0003.1.v3.1	Transcript	missense_variant	1955	1924	642	K/E	Aaa/Gaa	NA
29378351_1310219	29378351	A	Thupl.29378351s0003	Thupl.29378351s0003.1.v3.1	Transcript	missense_variant	1970	1939	647	D/N	Gac/Aac	NA
29378351_1318694	29378351	C	Thupl.29378351s0003	Thupl.29378351s0003.1.v3.1	Transcript	missense_variant	2190	2159	720	V/A	gTt/gCt	NA
29378352_289031	29378352	C	Thupl.29378352s0001	Thupl.29378352s0001.1.v3.1	Transcript	missense_variant	630	206	69	L/P	cTg/cCg	NA
29378352_364627	29378352	A	Thupl.29378352s0001	Thupl.29378352s0001.1.v3.1	Transcript	missense_variant	952	528	176	D/E	gaT/gaA	NA
29378354_378083	29378354	C	Thupl.29378354s0002	Thupl.29378354s0002.1.v3.1	Transcript	missense_variant	670	343	115	S/P	Tct/Cct	NA
29378354_415791	29378354	G	Thupl.29378354s0002	Thupl.29378354s0002.1.v3.1	Transcript	missense_variant	1201	874	292	I/V	Ata/Gta	NA
29378354_486800	29378354	T	Thupl.29378354s0002	Thupl.29378354s0002.1.v3.1	Transcript	missense_variant	2602	2275	759	V/L	Gta/Tta	NA
29378354_543466	29378354	G	Thupl.29378354s0002	Thupl.29378354s0002.1.v3.1	Transcript	missense_variant	2677	2350	784	I/V	Att/Gtt	NA
29378366_263808	29378366	G	Thupl.29378366s0001	Thupl.29378366s0001.1.v3.1	Transcript	missense_variant	1080	998	333	A/G	gCa/gGa	NA
29378366_717302	29378366	A	Thupl.29378366s0007	Thupl.29378366s0007.1.v3.1	Transcript	missense_variant	2330	1892	631	Y/F	tAt/tTt	NA
29378370_2627322	29378370	T	Thupl.29378370s0011	Thupl.29378370s0011.1.v3.1	Transcript	missense_variant	633	287	96	R/M	aGg/aTg	NA
29378373_1533197	29378373	C	Thupl.29378373s0005	Thupl.29378373s0005.1.v3.1	Transcript	missense_variant	519	81	27	R/S	agA/agC	NA
29378377_3753591	29378377	T	Thupl.29378377s0014	Thupl.29378377s0014.1.v3.1	Transcript	missense_variant	518	469	157	S/T	Tct/Act	NA
29378377_3753645	29378377	A	Thupl.29378377s0014	Thupl.29378377s0014.1.v3.1	Transcript	missense_variant	464	415	139	P/S	Cct/Tct	NA
29378377_4103749	29378377	T	Thupl.29378377s0015	Thupl.29378377s0015.1.v3.1	Transcript	missense_variant	1938	1673	558	G/E	gGa/gAa	NA
29378377_4494068	29378377	T	Thupl.29378377s0018	Thupl.29378377s0018.1.v3.1	Transcript	missense_variant	1043	676	226	R/S	Cgc/Agc	NA
29378377_4494089	29378377	A	Thupl.29378377s0018	Thupl.29378377s0018.1.v3.1	Transcript	missense_variant	1022	655	219	L/F	Ctt/Ttt	NA
29378377_4494221	29378377	G	Thupl.29378377s0018	Thupl.29378377s0018.1.v3.1	Transcript	missense_variant	890	523	175	V/L	Gtg/Ctg	NA
29378377_4786452	29378377	C	Thupl.29378377s0019	Thupl.29378377s0019.1.v3.1	Transcript	missense_variant	3004	2461	821	F/L	Ttt/Ctt	NA
29378377_4786453	29378377	G	Thupl.29378377s0019	Thupl.29378377s0019.1.v3.1	Transcript	missense_variant	3005	2462	821	N/S	aAt/aGt	NA
29378377_4827180	29378377	G	Thupl.29378377s0019	Thupl.29378377s0019.1.v3.1	Transcript	missense_variant	3839	3296	1099	K/R	aAa/aGa	NA
29378377_4827473	29378377	A	Thupl.29378377s0019	Thupl.29378377s0019.1.v3.1	Transcript	missense_variant	4132	3589	1197	G/S	Ggt/Agt	NA
29378377_4827522	29378377	C	Thupl.29378377s0019	Thupl.29378377s0019.1.v3.1	Transcript	missense_variant	4181	3638	1213	I/T	aTt/aCt	NA
29378388_1472013	29378388	G	Thupl.29378388s0015	Thupl.29378388s0015.1.v3.1	Transcript	missense_variant	1384	1340	447	V/A	gTc/gCc	NA
29378388_1967000	29378388	T	Thupl.29378388s0016	Thupl.29378388s0016.1.v3.1	Transcript	missense_variant	2753	2180	727	T/I	aCc/aTc	NA
29378393_1214588	29378393	C	Thupl.29378393s0002	Thupl.29378393s0002.1.v3.1	Transcript	missense_variant	452	352	118	S/P	Tcc/Ccc	NA
29378393_1739604	29378393	G	Thupl.29378393s0003	Thupl.29378393s0003.1.v3.1	Transcript	missense_variant	1778	1334	445	K/R	aAg/aGg	NA
29378393_1777639	29378393	A	Thupl.29378393s0003	Thupl.29378393s0003.4.v3.1	Transcript	missense_variant	1717	1354	452	D/N	Gat/Aat	NA
29378406_672571	29378406	T	Thupl.29378406s0002	Thupl.29378406s0002.1.v3.1	Transcript	missense_variant	5068	5068	1690	G/S	Ggt/Agt	NA
29378406_718889	29378406	G	Thupl.29378406s0002	Thupl.29378406s0002.1.v3.1	Transcript	missense_variant	3486	3486	1162	E/D	gaA/gaC	NA
29378407_4549427	29378407	G	Thupl.29378407s0020	Thupl.29378407s0020.1.v3.1	Transcript	missense_variant	3048	1745	582	I/T	aTa/aCa	NA
29378410_2875537	29378410	G	Thupl.29378410s0008	Thupl.29378410s0008.1.v3.1	Transcript	missense_variant	16	13	5	E/Q	Gag/Cag	NA
29378414_207527	29378414	A	Thupl.29378414s0001	Thupl.29378414s0001.1.v3.1	Transcript	missense_variant	412	342	114	L/F	ttG/ttT	NA
29378414_207765	29378414	C	Thupl.29378414s0001	Thupl.29378414s0001.1.v3.1	Transcript	missense_variant	174	104	35	L/R	cTa/cGa	NA
29378414_3652516	29378414	C	Thupl.29378414s0012	Thupl.29378414s0012.1.v3.1	Transcript	missense_variant	1095	836	279	M/T	aTg/aCg	NA
29378414_3680370	29378414	C	Thupl.29378414s0012	Thupl.29378414s0012.1.v3.1	Transcript	missense_variant	1572	1313	438	G/A	gGc/gCc	NA
29378414_4735206	29378414	C	Thupl.29378414s0021	Thupl.29378414s0021.1.v3.1	Transcript	missense_variant	2515	851	284	L/S	tTa/tCa	NA
29378414_4735532	29378414	A	Thupl.29378414s0021	Thupl.29378414s0021.1.v3.1	Transcript	missense_variant	2841	1177	393	V/I	Gtt/Att	NA
29378417_1463835	29378417	C	Thupl.29378417s0006	Thupl.29378417s0006.1.v3.1	Transcript	missense_variant	122	4	2	T/A	Acc/Gcc	NA
29378419_2294348	29378419	C	Thupl.29378419s0008	Thupl.29378419s0008.1.v3.1	Transcript	missense_variant	677	464	155	D/G	gAt/gGt	NA
29378420_1282596	29378420	T	Thupl.29378420s0005	Thupl.29378420s0005.1.v3.1	Transcript	missense_variant	4902	3350	1117	C/F	tGt/tTt	NA
29378427_1262475	29378427	T	Thupl.29378427s0012	Thupl.29378427s0012.1.v3.1	Transcript	missense_variant	1052	726	242	K/N	aaA/aaT	NA
29378434_1691201	29378434	G	Thupl.29378434s0008	Thupl.29378434s0008.1.v3.1	Transcript	missense_variant	456	182	61	S/C	tCt/tGt	NA
29378438_1393563	29378438	A	Thupl.29378438s0004	Thupl.29378438s0004.1.v3.1	Transcript	missense_variant	1362	919	307	N/Y	Aat/Tat	NA
29378438_1393576	29378438	C	Thupl.29378438s0004	Thupl.29378438s0004.1.v3.1	Transcript	missense_variant	1349	906	302	N/K	aaT/aaG	NA
29378444_464593	29378444	G	Thupl.29378444s0004	Thupl.29378444s0004.1.v3.1	Transcript	missense_variant	1322	764	255	D/A	gAt/gCt	NA
29378445_1330934	29378445	T	Thupl.29378445s0015	Thupl.29378445s0015.1.v3.1	Transcript	missense_variant	442	145	49	R/C	Cgc/Tgc	NA
29378451_517725	29378451	A	Thupl.29378451s0009	Thupl.29378451s0009.1.v3.1	Transcript	missense_variant	204	23	8	G/D	gGc/gAc	NA
29378451_517974	29378451	G	Thupl.29378451s0009	Thupl.29378451s0009.1.v3.1	Transcript	missense_variant	453	272	91	D/G	gAt/gGt	NA
29378451_568407	29378451	C	Thupl.29378451s0009	Thupl.29378451s0009.1.v3.1	Transcript	missense_variant	905	724	242	I/L	Att/Ctt	NA
29378451_606979	29378451	A	Thupl.29378451s0009	Thupl.29378451s0009.1.v3.1	Transcript	missense_variant	1301	1120	374	V/I	Gtt/Att	NA
29378456_1571176	29378456	C	Thupl.29378456s0020	Thupl.29378456s0020.1.v3.1	Transcript	missense_variant	260	40	14	S/G	Agt/Ggt	NA
29378456_2087668	29378456	A	Thupl.29378456s0031	Thupl.29378456s0031.3.v3.1	Transcript	missense_variant	1018	931	311	A/T	Gct/Act	NA
29378458_500697	29378458	T	Thupl.29378458s0005	Thupl.29378458s0005.1.v3.1	Transcript	missense_variant	966	947	316	V/E	gTa/gAa	NA
29378459_2111537	29378459	G	Thupl.29378459s0005	Thupl.29378459s0005.1.v3.1	Transcript	missense_variant	334	20	7	N/S	aAt/aGt	NA
29378459_2111574	29378459	G	Thupl.29378459s0005	Thupl.29378459s0005.1.v3.1	Transcript	missense_variant	371	57	19	I/M	atA/atG	NA
29378459_2128293	29378459	A	Thupl.29378459s0005	Thupl.29378459s0005.1.v3.1	Transcript	missense_variant	5741	5427	1809	H/Q	caT/caA	NA
29378459_2982812	29378459	T	Thupl.29378459s0008	Thupl.29378459s0008.1.v3.1	Transcript	missense_variant	543	172	58	G/W	Ggg/Tgg	NA
29378460_452334	29378460	G	Thupl.29378460s0003	Thupl.29378460s0003.1.v3.1	Transcript	missense_variant	1909	973	325	S/A	Tca/Gca	NA
29378460_972306	29378460	T	Thupl.29378460s0006	Thupl.29378460s0006.1.v3.1	Transcript	missense_variant	226	84	28	M/I	atG/atT	NA
29378460_1338310	29378460	A	Thupl.29378460s0008	Thupl.29378460s0008.1.v3.1	Transcript	missense_variant	1248	542	181	G/D	gGc/gAc	NA
29378460_1472378	29378460	A	Thupl.29378460s0009	Thupl.29378460s0009.1.v3.1	Transcript	missense_variant	352	58	20	A/S	Gca/Tca	NA
29378461_2390263	29378461	T	Thupl.29378461s0012	Thupl.29378461s0012.1.v3.1	Transcript	missense_variant	994	860	287	A/E	gCa/gAa	NA
29378461_2462055	29378461	T	Thupl.29378461s0012	Thupl.29378461s0012.1.v3.1	Transcript	missense_variant	402	268	90	D/N	Gac/Aac	NA
29378461_3024093	29378461	A	Thupl.29378461s0013	Thupl.29378461s0013.1.v3.1	Transcript	missense_variant	622	316	106	V/I	Gtc/Atc	NA
29378461_3040662	29378461	A	Thupl.29378461s0013	Thupl.29378461s0013.1.v3.1	Transcript	missense_variant	1025	719	240	G/E	gGa/gAa	NA
29378461_3718408	29378461	A	Thupl.29378461s0017	Thupl.29378461s0017.1.v3.1	Transcript	missense_variant	691	67	23	E/K	Gaa/Aaa	NA
29378461_4689531	29378461	T	Thupl.29378461s0019	Thupl.29378461s0019.1.v3.1	Transcript	missense_variant	1772	464	155	T/M	aCg/aTg	NA
29378467_656034	29378467	C	Thupl.29378467s0006	Thupl.29378467s0006.1.v3.1	Transcript	missense_variant	116	116	39	M/T	aTg/aCg	NA
29378467_1666600	29378467	T	Thupl.29378467s0011	Thupl.29378467s0011.1.v3.1	Transcript	missense_variant	258	185	62	S/N	aGt/aAt	NA
29378467_2597923	29378467	G	Thupl.29378467s0014	Thupl.29378467s0014.1.v3.1	Transcript	missense_variant	686	579	193	N/K	aaC/aaG	NA
29378467_3183172	29378467	G	Thupl.29378467s0017	Thupl.29378467s0017.1.v3.1	Transcript	missense_variant	576	576	192	N/K	aaC/aaG	NA
29378467_3183217	29378467	C	Thupl.29378467s0017	Thupl.29378467s0017.1.v3.1	Transcript	missense_variant	621	621	207	Q/H	caG/caC	NA
29378472_1834589	29378472	C	Thupl.29378472s0014	Thupl.29378472s0014.1.v3.1	Transcript	missense_variant	1475	343	115	N/H	Aac/Cac	NA
29378472_2614711	29378472	C	Thupl.29378472s0018	Thupl.29378472s0018.1.v3.1	Transcript	missense_variant	813	608	203	I/R	aTa/aGa	NA
29378472_2906956	29378472	T	Thupl.29378472s0019	Thupl.29378472s0019.1.v3.1	Transcript	missense_variant	151	33	11	H/Q	caT/caA	NA
29378472_3107117	29378472	G	Thupl.29378472s0020	Thupl.29378472s0020.1.v3.1	Transcript	missense_variant	1899	1750	584	I/V	Atc/Gtc	NA
29378474_683556	29378474	G	Thupl.29378474s0003	Thupl.29378474s0003.1.v3.1	Transcript	missense_variant	2206	857	286	H/R	cAt/cGt	NA
29378475_145994	29378475	G	Thupl.29378475s0001	Thupl.29378475s0001.1.v3.1	Transcript	missense_variant	1792	1419	473	I/M	atT/atG	NA
29378475_398640	29378475	G	Thupl.29378475s0002	Thupl.29378475s0002.1.v3.1	Transcript	missense_variant	1013	906	302	F/L	ttT/ttG	NA
29378479_753922	29378479	T	Thupl.29378479s0002	Thupl.29378479s0002.1.v3.1	Transcript	missense_variant	1649	1326	442	L/F	ttA/ttT	NA
29378479_776188	29378479	C	Thupl.29378479s0002	Thupl.29378479s0002.1.v3.1	Transcript	missense_variant	2439	2116	706	F/L	Ttc/Ctc	NA
29378480_450636	29378480	G	Thupl.29378480s0002	Thupl.29378480s0002.1.v3.1	Transcript	missense_variant	2279	2050	684	L/V	Ttg/Gtg	NA
29378480_558698	29378480	A	Thupl.29378480s0004	Thupl.29378480s0004.1.v3.1	Transcript	missense_variant	921	777	259	D/E	gaC/gaA	NA
29378480_558805	29378480	C	Thupl.29378480s0004	Thupl.29378480s0004.1.v3.1	Transcript	missense_variant	1028	884	295	L/P	cTa/cCa	NA
29378480_1307821	29378480	G	Thupl.29378480s0006	Thupl.29378480s0006.1.v3.1	Transcript	missense_variant	1633	1044	348	C/W	tgC/tgG	NA
29378482_1161820	29378482	A	Thupl.29378482s0005	Thupl.29378482s0005.1.v3.1	Transcript	missense_variant	559	259	87	A/T	Gct/Act	NA
29378483_220213	29378483	G	Thupl.29378483s0003	Thupl.29378483s0003.1.v3.1	Transcript	missense_variant	194	9	3	E/D	gaA/gaC	NA
29378484_1000348	29378484	G	Thupl.29378484s0007	Thupl.29378484s0007.1.v3.1	Transcript	missense_variant	1271	658	220	T/A	Aca/Gca	NA
29378485_4350617	29378485	G	Thupl.29378485s0009	Thupl.29378485s0009.1.v3.1	Transcript	missense_variant	668	368	123	Q/R	cAa/cGa	NA
29378485_4350620	29378485	A	Thupl.29378485s0009	Thupl.29378485s0009.1.v3.1	Transcript	missense_variant	671	371	124	G/D	gGt/gAt	NA
29378485_4897247	29378485	A	Thupl.29378485s0012	Thupl.29378485s0012.1.v3.1	Transcript	missense_variant	744	262	88	E/K	Gaa/Aaa	NA
29378485_7434999	29378485	T	Thupl.29378485s0020	Thupl.29378485s0020.1.v3.1	Transcript	missense_variant	661	241	81	V/F	Gtt/Ttt	NA
29378485_7435420	29378485	C	Thupl.29378485s0020	Thupl.29378485s0020.1.v3.1	Transcript	missense_variant	745	325	109	V/L	Gtt/Ctt	NA
29378485_7523417	29378485	C	Thupl.29378485s0020	Thupl.29378485s0020.1.v3.1	Transcript	missense_variant	1184	764	255	V/A	gTt/gCt	NA
29378485_7825381	29378485	G	Thupl.29378485s0023	Thupl.29378485s0023.1.v3.1	Transcript	missense_variant	1582	1299	433	F/L	ttC/ttG	NA
29378485_8050199	29378485	C	Thupl.29378485s0024	Thupl.29378485s0024.1.v3.1	Transcript	missense_variant	2196	1256	419	A/G	gCt/gGt	NA
29378487_167982	29378487	A	Thupl.29378487s0001	Thupl.29378487s0001.1.v3.1	Transcript	missense_variant	1162	916	306	H/Y	Cat/Tat	NA
29378490_2129924	29378490	C	Thupl.29378490s0004	Thupl.29378490s0004.1.v3.1	Transcript	missense_variant	883	658	220	S/P	Tct/Cct	NA
29378490_3518111	29378490	G	Thupl.29378490s0009	Thupl.29378490s0009.1.v3.1	Transcript	missense_variant	65	65	22	L/R	cTa/cGa	NA
29378490_3518157	29378490	T	Thupl.29378490s0009	Thupl.29378490s0009.1.v3.1	Transcript	missense_variant	111	111	37	E/D	gaG/gaT	NA
29378491_409352	29378491	A	Thupl.29378491s0007	Thupl.29378491s0007.1.v3.1	Transcript	missense_variant	1457	1321	441	N/Y	Aac/Tac	NA
29378491_409435	29378491	T	Thupl.29378491s0007	Thupl.29378491s0007.1.v3.1	Transcript	missense_variant	1374	1238	413	R/H	cGt/cAt	NA
29378491_600690	29378491	A	Thupl.29378491s0008	Thupl.29378491s0008.1.v3.1	Transcript	missense_variant	779	121	41	T/S	Act/Tct	NA
29378497_2940609	29378497	T	Thupl.29378497s0008	Thupl.29378497s0008.1.v3.1	Transcript	missense_variant	450	130	44	D/N	Gac/Aac	NA
29378499_428812	29378499	G	Thupl.29378499s0005	Thupl.29378499s0005.1.v3.1	Transcript	missense_variant	646	544	182	Y/H	Tac/Cac	NA
29378499_659379	29378499	G	Thupl.29378499s0009	Thupl.29378499s0009.1.v3.1	Transcript	missense_variant	2113	2023	675	N/D	Aac/Gac	NA
29378499_2463033	29378499	G	Thupl.29378499s0022	Thupl.29378499s0022.1.v3.1	Transcript	missense_variant	761	587	196	S/C	tCt/tGt	NA
29378499_2463047	29378499	C	Thupl.29378499s0022	Thupl.29378499s0022.1.v3.1	Transcript	missense_variant	775	601	201	S/P	Tca/Cca	NA
29378501_913068	29378501	A	Thupl.29378501s0005	Thupl.29378501s0005.1.v3.1	Transcript	missense_variant	1512	608	203	A/E	gCa/gAa	NA
29378511_609516	29378511	G	Thupl.29378511s0007	Thupl.29378511s0007.1.v3.1	Transcript	missense_variant	406	269	90	E/A	gAa/gCa	NA
29378516_577595	29378516	T	Thupl.29378516s0002	Thupl.29378516s0002.1.v3.1	Transcript	missense_variant	724	59	20	C/Y	tGt/tAt	NA
29378517_699646	29378517	T	Thupl.29378517s0003	Thupl.29378517s0003.1.v3.1	Transcript	missense_variant	214	122	41	N/I	aAt/aTt	NA
29378517_724046	29378517	C	Thupl.29378517s0003	Thupl.29378517s0003.1.v3.1	Transcript	missense_variant	505	413	138	G/A	gGt/gCt	NA
29378518_239840	29378518	C	Thupl.29378518s0002	Thupl.29378518s0002.1.v3.1	Transcript	missense_variant	692	309	103	I/M	atA/atG	NA
29378522_1394451	29378522	G	Thupl.29378522s0004	Thupl.29378522s0004.1.v3.1	Transcript	missense_variant	782	140	47	G/A	gGc/gCc	NA
29378522_2405881	29378522	T	Thupl.29378522s0005	Thupl.29378522s0005.1.v3.1	Transcript	missense_variant	557	395	132	S/N	aGt/aAt	NA
29378522_2760456	29378522	A	Thupl.29378522s0007	Thupl.29378522s0007.1.v3.1	Transcript	missense_variant	2407	1889	630	G/V	gGt/gTt	NA
29378522_4083105	29378522	C	Thupl.29378522s0016	Thupl.29378522s0016.1.v3.1	Transcript	missense_variant	1429	452	151	T/S	aCt/aGt	NA
29378522_4083136	29378522	T	Thupl.29378522s0016	Thupl.29378522s0016.1.v3.1	Transcript	missense_variant	1398	421	141	L/M	Ctg/Atg	NA
29378524_3791477	29378524	A	Thupl.29378524s0020	Thupl.29378524s0020.1.v3.1	Transcript	missense_variant	1627	894	298	H/Q	caC/caA	NA
29378524_3791483	29378524	C	Thupl.29378524s0020	Thupl.29378524s0020.1.v3.1	Transcript	missense_variant	1633	900	300	E/D	gaG/gaC	NA
29378524_4690271	29378524	A	Thupl.29378524s0024	Thupl.29378524s0024.1.v3.1	Transcript	missense_variant	4804	4529	1510	H/L	cAt/cTt	NA
29378524_4721744	29378524	A	Thupl.29378524s0024	Thupl.29378524s0024.1.v3.1	Transcript	missense_variant	4112	3837	1279	E/D	gaG/gaT	NA
29378524_4723486	29378524	C	Thupl.29378524s0024	Thupl.29378524s0024.1.v3.1	Transcript	missense_variant	2370	2095	699	N/D	Aat/Gat	NA
29378537_177117	29378537	G	Thupl.29378537s0003	Thupl.29378537s0003.1.v3.1	Transcript	missense_variant	546	47	16	L/R	cTt/cGt	NA
29378537_222338	29378537	A	Thupl.29378537s0003	Thupl.29378537s0003.1.v3.1	Transcript	missense_variant	698	199	67	P/T	Cca/Aca	NA
29378537_249685	29378537	G	Thupl.29378537s0003	Thupl.29378537s0003.1.v3.1	Transcript	missense_variant	822	323	108	N/S	aAt/aGt	NA
29378537_249770	29378537	G	Thupl.29378537s0003	Thupl.29378537s0003.1.v3.1	Transcript	missense_variant	907	408	136	D/E	gaC/gaG	NA
29378540_338405	29378540	G	Thupl.29378540s0001	Thupl.29378540s0001.1.v3.1	Transcript	missense_variant	704	330	110	Q/H	caG/caC	NA
29378540_338406	29378540	T	Thupl.29378540s0001	Thupl.29378540s0001.1.v3.1	Transcript	missense_variant	703	329	110	L/H	cTc/cAc	NA
29378540_443969	29378540	G	Thupl.29378540s0002	Thupl.29378540s0002.1.v3.1	Transcript	missense_variant	505	209	70	D/G	gAc/gGc	NA
29378540_444028	29378540	C	Thupl.29378540s0002	Thupl.29378540s0002.1.v3.1	Transcript	missense_variant	564	268	90	S/P	Tct/Cct	NA
29378540_1406198	29378540	G	Thupl.29378540s0008	Thupl.29378540s0008.1.v3.1	Transcript	missense_variant	888	676	226	V/L	Gtc/Ctc	NA
29378545_291524	29378545	T	Thupl.29378545s0001	Thupl.29378545s0001.2.v3.1	Transcript	missense_variant	494	62	21	P/L	cCg/cTg	NA
29378545_1310570	29378545	T	Thupl.29378545s0010	Thupl.29378545s0010.1.v3.1	Transcript	missense_variant	656	149	50	T/N	aCt/aAt	NA
29378545_3964653	29378545	A	Thupl.29378545s0022	Thupl.29378545s0022.1.v3.1	Transcript	missense_variant	1049	538	180	P/T	Cca/Aca	NA
29378545_4030291	29378545	T	Thupl.29378545s0022	Thupl.29378545s0022.1.v3.1	Transcript	missense_variant	1806	1295	432	R/I	aGa/aTa	NA
29378545_4030294	29378545	A	Thupl.29378545s0022	Thupl.29378545s0022.1.v3.1	Transcript	missense_variant	1809	1298	433	I/N	aTt/aAt	NA
29378546_1210773	29378546	T	Thupl.29378546s0006	Thupl.29378546s0006.1.v3.1	Transcript	missense_variant	4386	4058	1353	S/L	tCg/tTg	NA
29378546_1210811	29378546	A	Thupl.29378546s0006	Thupl.29378546s0006.1.v3.1	Transcript	missense_variant	4424	4096	1366	S/T	Tcc/Acc	NA
29378546_1269456	29378546	G	Thupl.29378546s0006	Thupl.29378546s0006.1.v3.1	Transcript	missense_variant	4713	4385	1462	S/C	tCt/tGt	NA
29378546_1270001	29378546	T	Thupl.29378546s0006	Thupl.29378546s0006.1.v3.1	Transcript	missense_variant	4999	4671	1557	K/N	aaG/aaT	NA
29378547_593937	29378547	G	Thupl.29378547s0001	Thupl.29378547s0001.1.v3.1	Transcript	missense_variant	1334	863	288	F/C	tTc/tGc	NA
29378549_96686	29378549	T	Thupl.29378549s0001	Thupl.29378549s0001.1.v3.1	Transcript	missense_variant	1882	1252	418	P/T	Cct/Act	NA
29378550_988043	29378550	C	Thupl.29378550s0004	Thupl.29378550s0004.1.v3.1	Transcript	missense_variant	199	150	50	L/F	ttA/ttC	NA
29378550_1314842	29378550	G	Thupl.29378550s0004	Thupl.29378550s0004.1.v3.1	Transcript	missense_variant	2381	2332	778	Q/E	Cag/Gag	NA
29378550_1360341	29378550	C	Thupl.29378550s0004	Thupl.29378550s0004.1.v3.1	Transcript	missense_variant	3011	2962	988	S/P	Tcc/Ccc	NA
29378550_2093787	29378550	G	Thupl.29378550s0007	Thupl.29378550s0007.1.v3.1	Transcript	missense_variant	2079	1208	403	Y/C	tAt/tGt	NA
29378550_2094167	29378550	T	Thupl.29378550s0007	Thupl.29378550s0007.1.v3.1	Transcript	missense_variant	2459	1588	530	G/C	Ggt/Tgt	NA
29378558_77556	29378558	G	Thupl.29378558s0002	Thupl.29378558s0002.1.v3.1	Transcript	missense_variant	268	230	77	M/T	aTg/aCg	NA
29378558_1935714	29378558	C	Thupl.29378558s0009	Thupl.29378558s0009.1.v3.1	Transcript	missense_variant	1198	706	236	Q/E	Caa/Gaa	NA
29378558_1935735	29378558	G	Thupl.29378558s0009	Thupl.29378558s0009.1.v3.1	Transcript	missense_variant	1177	685	229	G/R	Ggt/Cgt	NA
29378558_2390406	29378558	G	Thupl.29378558s0010	Thupl.29378558s0010.1.v3.1	Transcript	missense_variant	2950	2558	853	L/P	cTa/cCa	NA
29378558_3732161	29378558	G	Thupl.29378558s0014	Thupl.29378558s0014.1.v3.1	Transcript	missense_variant	1463	166	56	I/L	Atc/Ctc	NA
29378562_173231	29378562	C	Thupl.29378562s0003	Thupl.29378562s0003.1.v3.1	Transcript	missense_variant	2015	1676	559	D/G	gAt/gGt	NA
29378564_409779	29378564	T	Thupl.29378564s0003	Thupl.29378564s0003.1.v3.1	Transcript	missense_variant	685	530	177	A/V	gCc/gTc	NA
29378567_167973	29378567	T	Thupl.29378567s0002	Thupl.29378567s0002.1.v3.1	Transcript	missense_variant	220	220	74	V/I	Gta/Ata	NA
29378570_176786	29378570	G	Thupl.29378570s0004	Thupl.29378570s0004.1.v3.1	Transcript	missense_variant	341	42	14	D/E	gaC/gaG	NA
29378590_1112652	29378590	A	Thupl.29378590s0005	Thupl.29378590s0005.1.v3.1	Transcript	missense_variant	1829	1205	402	D/V	gAt/gTt	NA
29378590_1591896	29378590	A	Thupl.29378590s0006	Thupl.29378590s0006.1.v3.1	Transcript	missense_variant	338	169	57	V/I	Gtt/Att	NA
29378590_1592362	29378590	T	Thupl.29378590s0006	Thupl.29378590s0006.1.v3.1	Transcript	missense_variant	804	635	212	N/I	aAc/aTc	NA
29378590_1606474	29378590	A	Thupl.29378590s0006	Thupl.29378590s0006.1.v3.1	Transcript	missense_variant	1469	1300	434	A/T	Gcg/Acg	NA
29378590_1693828	29378590	G	Thupl.29378590s0006	Thupl.29378590s0006.1.v3.1	Transcript	missense_variant	1972	1803	601	F/L	ttT/ttG	NA
29378590_1981453	29378590	A	Thupl.29378590s0008	Thupl.29378590s0008.1.v3.1	Transcript	missense_variant	720	665	222	P/L	cCt/cTt	NA
29378590_2087162	29378590	G	Thupl.29378590s0009	Thupl.29378590s0009.1.v3.1	Transcript	missense_variant	1355	701	234	P/R	cCc/cGc	NA
29378590_2089708	29378590	T	Thupl.29378590s0009	Thupl.29378590s0009.1.v3.1	Transcript	missense_variant	2347	1693	565	T/S	Act/Tct	NA
29378590_2866888	29378590	C	Thupl.29378590s0015	Thupl.29378590s0015.1.v3.1	Transcript	missense_variant	674	472	158	I/V	Ata/Gta	NA
29378590_3254588	29378590	C	Thupl.29378590s0017	Thupl.29378590s0017.1.v3.1	Transcript	missense_variant	1044	443	148	V/A	gTa/gCa	NA
29378590_3718532	29378590	A	Thupl.29378590s0020	Thupl.29378590s0020.1.v3.1	Transcript	missense_variant	882	620	207	T/I	aCc/aTc	NA
29378592_1043709	29378592	A	Thupl.29378592s0007	Thupl.29378592s0007.1.v3.1	Transcript	missense_variant	354	125	42	P/L	cCa/cTa	NA
29378597_917699	29378597	C	Thupl.29378597s0003	Thupl.29378597s0003.1.v3.1	Transcript	missense_variant	2210	1132	378	I/V	Ata/Gta	NA
29378604_1504650	29378604	A	Thupl.29378604s0005	Thupl.29378604s0005.1.v3.1	Transcript	missense_variant	1751	1621	541	G/S	Ggt/Agt	NA
29378604_1593494	29378604	A	Thupl.29378604s0006	Thupl.29378604s0006.1.v3.1	Transcript	missense_variant	722	64	22	V/I	Gta/Ata	NA
29378604_1961603	29378604	T	Thupl.29378604s0011	Thupl.29378604s0011.1.v3.1	Transcript	missense_variant	665	525	175	L/F	ttG/ttT	NA
29378609_1266741	29378609	G	Thupl.29378609s0006	Thupl.29378609s0006.1.v3.1	Transcript	missense_variant	421	257	86	F/S	tTt/tCt	NA
29378616_195019	29378616	A	Thupl.29378616s0001	Thupl.29378616s0001.1.v3.1	Transcript	missense_variant	1298	102	34	F/L	ttT/ttA	NA
29378616_195636	29378616	T	Thupl.29378616s0001	Thupl.29378616s0001.1.v3.1	Transcript	missense_variant	1915	719	240	S/L	tCg/tTg	NA
29378618_1157993	29378618	A	Thupl.29378618s0005	Thupl.29378618s0005.1.v3.1	Transcript	missense_variant	104	52	18	L/I	Cta/Ata	NA
29378621_1977156	29378621	T	Thupl.29378621s0009	Thupl.29378621s0009.1.v3.1	Transcript	missense_variant	484	431	144	P/L	cCt/cTt	NA
29378621_2503261	29378621	T	Thupl.29378621s0012	Thupl.29378621s0012.1.v3.1	Transcript	missense_variant	280	222	74	D/E	gaC/gaA	NA
29378632_772440	29378632	C	Thupl.29378632s0001	Thupl.29378632s0001.1.v3.1	Transcript	missense_variant	1223	701	234	V/A	gTg/gCg	NA
29378632_773627	29378632	C	Thupl.29378632s0001	Thupl.29378632s0001.1.v3.1	Transcript	missense_variant	2410	1888	630	F/L	Ttt/Ctt	NA
29378632_1067533	29378632	T	Thupl.29378632s0003	Thupl.29378632s0003.1.v3.1	Transcript	missense_variant	1291	666	222	L/F	ttA/ttT	NA
29378636_2837329	29378636	A	Thupl.29378636s0006	Thupl.29378636s0006.1.v3.1	Transcript	missense_variant	185	16	6	V/I	Gta/Ata	NA
29378637_3087789	29378637	A	Thupl.29378637s0025	Thupl.29378637s0025.1.v3.1	Transcript	missense_variant	256	26	9	L/H	cTt/cAt	NA
29378644_495168	29378644	G	Thupl.29378644s0003	Thupl.29378644s0003.1.v3.1	Transcript	missense_variant	276	173	58	D/G	gAc/gGc	NA
29378647_340983	29378647	G	Thupl.29378647s0002	Thupl.29378647s0002.1.v3.1	Transcript	missense_variant	854	854	285	M/T	aTg/aCg	NA
29378649_1027256	29378649	G	Thupl.29378649s0002	Thupl.29378649s0002.1.v3.1	Transcript	missense_variant	5275	4661	1554	I/T	aTc/aCc	NA
29378649_1044505	29378649	T	Thupl.29378649s0002	Thupl.29378649s0002.1.v3.1	Transcript	missense_variant	4640	4026	1342	M/I	atG/atA	NA
29378657_957701	29378657	A	Thupl.29378657s0010	Thupl.29378657s0010.1.v3.1	Transcript	missense_variant	492	179	60	A/V	gCt/gTt	NA
29378660_592779	29378660	G	Thupl.29378660s0003	Thupl.29378660s0003.1.v3.1	Transcript	missense_variant	729	497	166	V/A	gTa/gCa	NA
29378664_2064722	29378664	G	Thupl.29378664s0008	Thupl.29378664s0008.1.v3.1	Transcript	missense_variant	82	16	6	I/V	Atc/Gtc	NA
29378664_3546079	29378664	T	Thupl.29378664s0015	Thupl.29378664s0015.1.v3.1	Transcript	missense_variant	1315	1045	349	V/I	Gta/Ata	NA
29378666_413661	29378666	T	Thupl.29378666s0007	Thupl.29378666s0007.1.v3.1	Transcript	missense_variant	799	743	248	P/Q	cCa/cAa	NA
29378673_234894	29378673	T	Thupl.29378673s0003	Thupl.29378673s0003.1.v3.1	Transcript	missense_variant	171	146	49	I/N	aTt/aAt	NA
29378680_448314	29378680	A	Thupl.29378680s0007	Thupl.29378680s0007.1.v3.1	Transcript	missense_variant	869	445	149	L/F	Ctc/Ttc	NA
29378682_233302	29378682	A	Thupl.29378682s0001	Thupl.29378682s0001.1.v3.1	Transcript	missense_variant	2358	1288	430	V/I	Gtt/Att	NA
29378682_2965396	29378682	A	Thupl.29378682s0010	Thupl.29378682s0010.1.v3.1	Transcript	missense_variant	951	709	237	R/C	Cgt/Tgt	NA
29378682_3004929	29378682	A	Thupl.29378682s0010	Thupl.29378682s0010.1.v3.1	Transcript	missense_variant	481	239	80	H/L	cAc/cTc	NA
29378683_758228	29378683	T	Thupl.29378683s0007	Thupl.29378683s0007.1.v3.1	Transcript	missense_variant	307	17	6	R/Q	cGg/cAg	NA
29378689_180635	29378689	G	Thupl.29378689s0001	Thupl.29378689s0001.1.v3.1	Transcript	missense_variant	452	151	51	T/P	Acc/Ccc	NA
29378699_1630935	29378699	G	Thupl.29378699s0008	Thupl.29378699s0008.1.v3.1	Transcript	missense_variant	863	307	103	S/A	Tct/Gct	NA
29378699_1631992	29378699	A	Thupl.29378699s0008	Thupl.29378699s0008.1.v3.1	Transcript	missense_variant	1920	1364	455	S/N	aGt/aAt	NA
29378699_1652160	29378699	C	Thupl.29378699s0008	Thupl.29378699s0008.1.v3.1	Transcript	missense_variant	3747	3191	1064	V/A	gTa/gCa	NA
29378707_353725	29378707	C	Thupl.29378707s0001	Thupl.29378707s0001.1.v3.1	Transcript	missense_variant	480	311	104	E/G	gAa/gGa	NA
29378707_353814	29378707	G	Thupl.29378707s0001	Thupl.29378707s0001.1.v3.1	Transcript	missense_variant	391	222	74	E/D	gaG/gaC	NA
29378707_353873	29378707	A	Thupl.29378707s0001	Thupl.29378707s0001.1.v3.1	Transcript	missense_variant	332	163	55	T/S	Acg/Tcg	NA
29378717_1232442	29378717	A	Thupl.29378717s0004	Thupl.29378717s0004.1.v3.1	Transcript	missense_variant	823	577	193	F/I	Ttt/Att	NA
29378725_96396	29378725	C	Thupl.29378725s0001	Thupl.29378725s0001.1.v3.1	Transcript	missense_variant	2257	2144	715	L/R	cTt/cGt	NA
29378725_96408	29378725	C	Thupl.29378725s0001	Thupl.29378725s0001.1.v3.1	Transcript	missense_variant	2245	2132	711	T/R	aCa/aGa	NA
29378725_96444	29378725	G	Thupl.29378725s0001	Thupl.29378725s0001.1.v3.1	Transcript	missense_variant	2209	2096	699	V/A	gTt/gCt	NA
29378725_96697	29378725	G	Thupl.29378725s0001	Thupl.29378725s0001.1.v3.1	Transcript	missense_variant	1956	1843	615	N/H	Aat/Cat	NA
29378725_608562	29378725	G	Thupl.29378725s0003	Thupl.29378725s0003.1.v3.1	Transcript	missense_variant	2265	2017	673	K/E	Aaa/Gaa	NA
29378727_397113	29378727	C	Thupl.29378727s0001	Thupl.29378727s0001.1.v3.1	Transcript	missense_variant	356	151	51	E/Q	Gaa/Caa	NA
29378727_507052	29378727	C	Thupl.29378727s0001	Thupl.29378727s0001.1.v3.1	Transcript	missense_variant	1112	907	303	F/L	Ttt/Ctt	NA
29378727_556519	29378727	C	Thupl.29378727s0001	Thupl.29378727s0001.1.v3.1	Transcript	missense_variant	2090	1885	629	C/R	Tgc/Cgc	NA
29378728_1568849	29378728	T	Thupl.29378728s0004	Thupl.29378728s0004.1.v3.1	Transcript	missense_variant	425	60	20	M/I	atG/atT	NA
29378728_1568979	29378728	T	Thupl.29378728s0004	Thupl.29378728s0004.1.v3.1	Transcript	missense_variant	555	190	64	A/S	Gca/Tca	NA
29378728_2348649	29378728	G	Thupl.29378728s0010	Thupl.29378728s0010.1.v3.1	Transcript	missense_variant	882	649	217	N/H	Aat/Cat	NA
29378728_2394310	29378728	G	Thupl.29378728s0010	Thupl.29378728s0010.1.v3.1	Transcript	missense_variant	657	424	142	V/L	Gtg/Ctg	NA
29378735_6461472	29378735	G	Thupl.29378735s0021	Thupl.29378735s0021.1.v3.1	Transcript	missense_variant	2132	1006	336	I/V	Att/Gtt	NA
29378735_6652952	29378735	T	Thupl.29378735s0023	Thupl.29378735s0023.1.v3.1	Transcript	missense_variant	2611	2374	792	H/N	Cat/Aat	NA
29378735_8270860	29378735	C	Thupl.29378735s0028	Thupl.29378735s0028.1.v3.1	Transcript	missense_variant	1908	1687	563	T/P	Acc/Ccc	NA
29378735_10577921	29378735	G	Thupl.29378735s0039	Thupl.29378735s0039.1.v3.1	Transcript	missense_variant	1597	550	184	T/A	Aca/Gca	NA
29378735_10581460	29378735	C	Thupl.29378735s0039	Thupl.29378735s0039.1.v3.1	Transcript	missense_variant	2662	1615	539	N/H	Aac/Cac	NA
29378736_82902	29378736	C	Thupl.29378736s0001	Thupl.29378736s0001.1.v3.1	Transcript	missense_variant	884	739	247	E/Q	Gaa/Caa	NA
29378736_108389	29378736	C	Thupl.29378736s0001	Thupl.29378736s0001.1.v3.1	Transcript	missense_variant	1230	1085	362	R/T	aGg/aCg	NA
29378736_179837	29378736	T	Thupl.29378736s0001	Thupl.29378736s0001.1.v3.1	Transcript	missense_variant	1530	1385	462	T/I	aCa/aTa	NA
29378736_1629390	29378736	G	Thupl.29378736s0014	Thupl.29378736s0014.1.v3.1	Transcript	missense_variant	395	43	15	N/D	Aac/Gac	NA
29378736_1629402	29378736	G	Thupl.29378736s0014	Thupl.29378736s0014.1.v3.1	Transcript	missense_variant	407	55	19	Y/D	Tat/Gat	NA
29378736_2635080	29378736	T	Thupl.29378736s0020	Thupl.29378736s0020.1.v3.1	Transcript	missense_variant	353	255	85	D/E	gaC/gaA	NA
29378737_222309	29378737	C	Thupl.29378737s0002	Thupl.29378737s0002.1.v3.1	Transcript	missense_variant	606	256	86	I/V	Att/Gtt	NA
29378743_1796103	29378743	C	Thupl.29378743s0009	Thupl.29378743s0009.1.v3.1	Transcript	missense_variant	2304	1400	467	I/T	aTa/aCa	NA
29378744_186311	29378744	C	Thupl.29378744s0002	Thupl.29378744s0002.1.v3.1	Transcript	missense_variant	273	273	91	E/D	gaG/gaC	NA
29378751_533174	29378751	T	Thupl.29378751s0001	Thupl.29378751s0001.1.v3.1	Transcript	missense_variant	408	80	27	A/V	gCt/gTt	NA
29378758_341637	29378758	T	Thupl.29378758s0005	Thupl.29378758s0005.1.v3.1	Transcript	missense_variant	3425	2830	944	H/N	Cac/Aac	NA
29378758_341684	29378758	T	Thupl.29378758s0005	Thupl.29378758s0005.1.v3.1	Transcript	missense_variant	3378	2783	928	R/K	aGa/aAa	NA
29378764_720534	29378764	A	Thupl.29378764s0002	Thupl.29378764s0002.1.v3.1	Transcript	missense_variant	1341	970	324	V/I	Gta/Ata	NA
29378771_155153	29378771	T	Thupl.29378771s0005	Thupl.29378771s0005.1.v3.1	Transcript	missense_variant	155	10	4	R/C	Cgt/Tgt	NA
29378771_155477	29378771	C	Thupl.29378771s0005	Thupl.29378771s0005.1.v3.1	Transcript	missense_variant	357	212	71	R/P	cGt/cCt	NA
29378771_4010462	29378771	T	Thupl.29378771s0025	Thupl.29378771s0025.1.v3.1	Transcript	missense_variant	932	698	233	N/I	aAt/aTt	NA
29378772_169075	29378772	T	Thupl.29378772s0003	Thupl.29378772s0003.1.v3.1	Transcript	missense_variant	2850	2506	836	V/I	Gtt/Att	NA
29378772_509714	29378772	C	Thupl.29378772s0006	Thupl.29378772s0006.1.v3.1	Transcript	missense_variant	671	310	104	G/R	Ggg/Cgg	NA
29378774_702002	29378774	A	Thupl.29378774s0004	Thupl.29378774s0004.1.v3.1	Transcript	missense_variant	910	589	197	I/F	Att/Ttt	NA
29378774_783422	29378774	C	Thupl.29378774s0006	Thupl.29378774s0006.1.v3.1	Transcript	missense_variant	416	230	77	N/S	aAt/aGt	NA
29378774_947179	29378774	G	Thupl.29378774s0008	Thupl.29378774s0008.1.v3.1	Transcript	missense_variant	1752	715	239	P/A	Ccc/Gcc	NA
29378774_947417	29378774	T	Thupl.29378774s0008	Thupl.29378774s0008.1.v3.1	Transcript	missense_variant	1990	953	318	S/F	tCt/tTt	NA
29378777_762119	29378777	C	Thupl.29378777s0002	Thupl.29378777s0002.1.v3.1	Transcript	missense_variant	596	494	165	V/A	gTg/gCg	NA
29378777_1103369	29378777	G	Thupl.29378777s0006	Thupl.29378777s0006.1.v3.1	Transcript	missense_variant	485	253	85	Y/D	Tat/Gat	NA
29378777_3452808	29378777	T	Thupl.29378777s0018	Thupl.29378777s0018.1.v3.1	Transcript	missense_variant	342	158	53	R/H	cGt/cAt	NA
29378781_195902	29378781	C	Thupl.29378781s0001	Thupl.29378781s0001.1.v3.1	Transcript	missense_variant	1650	1378	460	K/E	Aaa/Gaa	NA
29378800_706226	29378800	C	Thupl.29378800s0004	Thupl.29378800s0004.1.v3.1	Transcript	missense_variant	184	14	5	L/P	cTg/cCg	NA
29378800_2818217	29378800	A	Thupl.29378800s0012	Thupl.29378800s0012.1.v3.1	Transcript	missense_variant	479	16	6	P/S	Ccc/Tcc	NA
29378803_1164192	29378803	G	Thupl.29378803s0004	Thupl.29378803s0004.1.v3.1	Transcript	missense_variant	2080	1913	638	I/T	aTc/aCc	NA
29378803_7794668	29378803	C	Thupl.29378803s0030	Thupl.29378803s0030.1.v3.1	Transcript	missense_variant	1035	940	314	I/V	Ata/Gta	NA
29378803_7794727	29378803	T	Thupl.29378803s0030	Thupl.29378803s0030.1.v3.1	Transcript	missense_variant	976	881	294	A/D	gCc/gAc	NA
29378803_7795037	29378803	A	Thupl.29378803s0030	Thupl.29378803s0030.1.v3.1	Transcript	missense_variant	881	786	262	E/D	gaA/gaT	NA
29378803_10243610	29378803	C	Thupl.29378803s0044	Thupl.29378803s0044.1.v3.1	Transcript	missense_variant	663	502	168	V/L	Gtt/Ctt	NA
29378810_782046	29378810	G	Thupl.29378810s0007	Thupl.29378810s0007.1.v3.1	Transcript	missense_variant	7	7	3	I/V	Att/Gtt	NA
29378811_110935	29378811	G	Thupl.29378811s0003	Thupl.29378811s0003.1.v3.1	Transcript	missense_variant	179	179	60	N/S	aAt/aGt	NA
29378819_937093	29378819	C	Thupl.29378819s0007	Thupl.29378819s0007.1.v3.1	Transcript	missense_variant	657	584	195	M/T	aTg/aCg	NA
29378819_1133124	29378819	G	Thupl.29378819s0008	Thupl.29378819s0008.1.v3.1	Transcript	missense_variant	446	172	58	L/V	Cta/Gta	NA
29378819_1159205	29378819	G	Thupl.29378819s0008	Thupl.29378819s0008.1.v3.1	Transcript	missense_variant	742	468	156	D/E	gaT/gaG	NA
29378819_1621113	29378819	T	Thupl.29378819s0009	Thupl.29378819s0009.1.v3.1	Transcript	missense_variant	344	28	10	A/T	Gcg/Acg	NA
29378819_2195274	29378819	T	Thupl.29378819s0011	Thupl.29378819s0011.1.v3.1	Transcript	missense_variant	1074	145	49	G/R	Gga/Aga	NA
29378820_213772	29378820	C	Thupl.29378820s0001	Thupl.29378820s0001.1.v3.1	Transcript	missense_variant	1057	802	268	F/V	Ttt/Gtt	NA
29378820_1949879	29378820	A	Thupl.29378820s0014	Thupl.29378820s0014.1.v3.1	Transcript	missense_variant	2973	2353	785	A/T	Gct/Act	NA
29378820_1951299	29378820	G	Thupl.29378820s0014	Thupl.29378820s0014.1.v3.1	Transcript	missense_variant	4393	3773	1258	L/R	cTg/cGg	NA
29378820_1951440	29378820	A	Thupl.29378820s0014	Thupl.29378820s0014.1.v3.1	Transcript	missense_variant	4534	3914	1305	G/E	gGa/gAa	NA
29378823_857244	29378823	A	Thupl.29378823s0003	Thupl.29378823s0003.1.v3.1	Transcript	missense_variant	776	578	193	S/L	tCg/tTg	NA
29378823_1025095	29378823	A	Thupl.29378823s0004	Thupl.29378823s0004.1.v3.1	Transcript	missense_variant	1702	1360	454	L/I	Ctt/Att	NA
29378823_1026114	29378823	G	Thupl.29378823s0004	Thupl.29378823s0004.1.v3.1	Transcript	missense_variant	2570	2228	743	A/G	gCt/gGt	NA
29378823_1026173	29378823	G	Thupl.29378823s0004	Thupl.29378823s0004.1.v3.1	Transcript	missense_variant	2629	2287	763	S/A	Tct/Gct	NA
29378826_1168684	29378826	T	Thupl.29378826s0008	Thupl.29378826s0008.1.v3.1	Transcript	missense_variant	2001	1096	366	R/C	Cgt/Tgt	NA
29378826_1532245	29378826	T	Thupl.29378826s0009	Thupl.29378826s0009.1.v3.1	Transcript	missense_variant	2224	1601	534	T/M	aCg/aTg	NA
29378826_2012144	29378826	A	Thupl.29378826s0010	Thupl.29378826s0010.1.v3.1	Transcript	missense_variant	2081	1853	618	L/Q	cTg/cAg	NA
29378827_218986	29378827	T	Thupl.29378827s0002	Thupl.29378827s0002.1.v3.1	Transcript	missense_variant	961	563	188	G/D	gGt/gAt	NA
[truncated: 4,892 more rows]

## Sheet: Intergenic_SNPs
SNP	Scaffold	Allele	Gene	Feature	Feature_type	Consequence	cDNA_position	CDS_position	Protein_position	Amino_acids	Codons	Existing_variation
[truncated: 4,631 more rows]
